# Supplementary material for: Fasting and time of day independently modulate circadian rhythm relevant gene expression in adipose and skin tissue
Source: BMC Genomics. 2018 Sep 7;19:659. doi: 10.1186/s12864-018-4997-y (PMC6129005; doi:10.1186/s12864-018-4997-y)
Supplement: Supplementary file 1 — Table S1. Genes significantly associated with hours of fasting, time of day or seasonality in fat or skin. Table S2. Replicability of literature studies and our study across taxa. Table S3. Replicability of genes associated with hours fasting and time of day. Table S4. Gene ontology enrichment of the hours fasting and solar time in fat and skin using TopGO. Table S5. Gene ontology enrichment of the hours fasting and solar time in fat and skin using ToppFun. Table S6. Ingenuity canonical pathways enrichment of the hours fasting and solar time in fat and skin using Ingenuity software. Table S7. Sensitivity analysis of GO term enrichment using Cut-off P < 2E-6 equivalent to BY FDR < 5%. Table S8. Sensitivity analysis of GO term enrichment using Cut-off P < 5E-7 equivalent to Bonferroni correction for 100, 000 independent tests. Table S9. Number of genes associated with hours fasting as a function of tissue, quantification, regression model. Table S10. Top pathway obtained with enrichment analysis of Fat and Skin gene expression as a function of quantification, regression model, and P-value corrections. Table S11. Epidemiological identification of mediators of the response to fasting. Table S12. Genes with eQTL SNPs overlapping GWAS Signals associated with multiple phenotypes, enriched for cardio-metabolic and immune related phenotypes. Table S13. Genes with GxE eQTL SNPs with FWER< 0.05. (XLSX 440 kb) [file 12864_2018_4997_MOESM1_ESM.xlsx]

## Sheet: Table S1. Associated genes 
			Hours Fasting				Time of Day				Seasonality						Heritability		Annotations
			Beta		P		Beta		P		Beta				P
GeneName	Chr	Exon Coordinate (Build 37)	Fat	Skin	Fat	Skin	Fat	Skin	Fat	Skin	Sin Fat	Cos Fat	Sin Skin	Cos Skin	Fat	Skin	Fat	Skin	Gene_type	Strand	Gene_Symbol
ABCC2	10	101611259-101611949	0.0418637	-0.00962191	1.35773e-06	0.310859	-0.0946986	-0.0108536	2.36128e-06	0.619574	-0.0836173	-0.186906	0.0613812	0.157827	0.00116977	0.0244007	1.81305e-10	0.331916	protein_coding	+	ENSG00000023839
ABCE1	4	146048678-146050331	-0.0389373	-0.0178	1.01858e-06	0.0140413	0.00697286	-0.0317997	0.699612	0.0565164	0.0752425	-0.0151877	0.013959	0.0160803	0.298429	0.896832	0.240812	1.91314e-10	protein_coding	+	ENSG00000164163
ABCF2	7	150904923-150905193	-0.0399474	-0.00947037	9.18991e-06	0.269865	0.0182561	0.00103756	0.371605	0.957623	0.0056036	0.0609586	-0.0502853	0.113619	0.584181	0.104118	5.04718e-10	0.013676	protein_coding	-	ENSG00000033050
ABCG1	21	43716274-43717354	-0.0408736	-0.0184605	9.54217e-06	0.0617371	0.0296025	0.00695687	0.171219	0.761461	-0.0853373	-0.0820957	-0.0811194	-0.146095	0.139801	0.0340994	0.510282	0.344655	protein_coding	+	ENSG00000160179
AC004386.4	X	73595960-73596720	-0.0122906	-0.0162881	0.145237	0.0384527	-0.00771652	-0.00808634	0.689794	0.651049	-0.0194902	0.0664903	-0.237754	0.0908272	0.480656	3.90412e-06	0.218519	0.105977	pseudogene	-	ENSG00000213269
AC008738.1	19	33790853-33792753	0.0379983	0.00844564	5.70155e-06	0.204138	-0.048047	0.0203359	0.0134046	0.18191	-0.0147478	0.151219	-0.0312484	-0.0159566	0.030554	0.693631	0.249442	0.224059	pseudogene	-	ENSG00000230259
AC016738.4	2	101610138-101612471	-0.0203218	-0.0491198	0.0260563	1.18695e-08	0.0281324	0.0991855	0.178784	5.90392e-07	0.0435514	0.053703	0.107968	0.142315	0.47911	0.00469985	0.332481	0	antisense	-	ENSG00000223947
AC034193.5	3	10044401-10046928	0.00682772	-0.0131481	0.437054	0.118389	-0.00258882	-0.0233901	0.898867	0.225614	-0.0253171	-0.042571	0.227337	0.113709	0.686885	8.23575e-06	1.79538e-16	0.0422425	pseudogene	+	ENSG00000180385
AC096574.4	2	239154932-239155119	0.0550454	0.0216555	1.43594e-10	0.00864935	-0.0660087	-0.101766	0.000635823	1.02529e-07	0.0437887	0.0028975	0.061224	0.0525165	0.693473	0.288021	0	0.557791	processed_transcript	+	ENSG00000225057
AC097711.1	4	81000686-81002273	-0.041509	-0.00475337	2.82562e-06	0.618907	-0.000987779	0.00366843	0.960983	0.866939	0.120065	-0.0313591	0.0407251	-0.0687327	0.0848503	0.47391	2.46546e-11	0.0503752	pseudogene	+	ENSG00000236530
ACACB	12	109698285-109698462	0.0217247	0.00479957	0.00814032	0.593159	-0.0454171	-0.0055186	0.0196668	0.787866	0.051091	0.0549024	0.214936	0.216111	0.371112	5.63588e-07	0.543964	5.80291e-10	protein_coding	+	ENSG00000076555
ACAD8	11	134126982-134127151	-0.0101135	-0.00780607	0.246109	0.371527	0.0151679	0.0163932	0.452	0.411541	0.0301708	0.0614249	0.245205	0.119529	0.488389	3.0502e-06	0.0129842	0.419637	protein_coding	+	ENSG00000151498
ACAD8	11	134127641-134128518	0.00217656	0.00730894	0.807289	0.356304	0.0148524	0.042055	0.47061	0.0202601	0.0545502	-0.0627277	0.232032	0.0820642	0.382122	3.34696e-06	0.306175	0	protein_coding	+	ENSG00000151498
ACAD8	11	134128786-134131073	-0.0174195	-0.0208398	0.0461956	0.0138025	0.0471491	0.0240633	0.0200404	0.214631	0.0619722	-0.0707215	0.278979	0.0626437	0.28217	4.66443e-07	0.0243284	0.317452	protein_coding	+	ENSG00000151498
ACAD8	11	134131501-134131784	-0.00628214	-0.0165402	0.482205	0.0721113	0.0286438	0.00368475	0.165468	0.862064	-0.000497921	0.0118708	0.251995	0.120862	0.980992	8.8715e-06	0	0.285455	protein_coding	+	ENSG00000151498
ACKR4	3	132319233-132321059	-0.0474941	-0.000814144	2.18933e-07	0.930825	0.049403	-0.00755298	0.0196654	0.730923	-0.127258	-0.0600762	-0.0352002	-0.0410802	0.044868	0.673173	0.350014	6.1255e-12	protein_coding	+	ENSG00000129048
ACSL3	2	223795329-223795530	-0.0406928	-0.0102508	4.6529e-06	0.196729	-0.00485316	0.0135254	0.811016	0.455554	0.0197007	0.0206695	0.0727196	0.112791	0.875332	0.0284817	0.189677	0.41701	protein_coding	+	ENSG00000123983
ACSL3	2	223799248-223799405	-0.0393918	-0.00940154	5.89618e-06	0.246833	0.0206176	0.0017689	0.307697	0.924054	0.0164066	0.004789	0.099088	0.106102	0.952402	0.0166343	0.227189	0.517309	protein_coding	+	ENSG00000123983
ACTA2	10	90694831-90695123	-0.0444134	-0.00360982	4.86424e-07	0.704098	0.0557406	0.0406182	0.00591958	0.0660319	0.0385224	0.0104379	0.0238272	0.253534	0.764728	0.000503004	3.93313e-10	2.8091e-11	protein_coding	-	ENSG00000107796
ACTA2	10	90697818-90697999	-0.0456906	-0.00579419	3.35764e-07	0.535492	0.057534	0.0370058	0.0051194	0.0880967	0.061312	-0.0308668	0.0508135	0.258664	0.491925	0.000183826	1.56965e-13	7.5773e-11	protein_coding	-	ENSG00000107796
ACTA2	10	90699264-90699455	-0.0470838	-0.00513721	1.27599e-07	0.577727	0.0500184	0.0414472	0.0142379	0.0528861	0.0435426	-0.00125421	0.0761155	0.244319	0.734698	0.000195357	0.105358	8.78743e-19	protein_coding	-	ENSG00000107796
ACTA2	10	90700758-90701147	-0.0443668	-0.00509509	6.70198e-07	0.582921	0.0443795	0.0401281	0.0305493	0.0620682	0.0558186	-0.0159645	0.0935961	0.249453	0.591403	9.77458e-05	0.0270718	0	protein_coding	-	ENSG00000107796
ACTA2	10	90701542-90701626	-0.0478007	-0.00140889	2.14092e-07	0.871263	0.051329	0.0401152	0.0154532	0.0457184	0.0617287	-0.024606	0.102731	0.238685	0.529425	3.8635e-05	0.0540402	4.32088e-12	protein_coding	-	ENSG00000107796
ACTA2	10	90703554-90703664	-0.0469079	-0.00357375	2.62802e-07	0.690493	0.0403983	0.039758	0.0534419	0.0554051	0.087059	-0.046539	0.107261	0.231772	0.246762	8.87626e-05	4.18809e-10	9.05301e-10	protein_coding	-	ENSG00000107796
ACTA2	10	90706577-90707143	-0.0456965	-0.0031711	2.45709e-07	0.727625	0.0377415	0.0380333	0.0635836	0.0707735	0.0693018	-0.0383145	0.102787	0.234493	0.386872	0.000113984	0.0803473	3.01024e-17	protein_coding	-	ENSG00000107796
ACTA2	10	90707999-90708710	-0.0420775	-0.00570412	8.98696e-07	0.527204	0.0363224	0.0402001	0.065344	0.053877	0.0667334	-0.0074439	0.118814	0.248083	0.45982	2.31783e-05	0.104863	0	protein_coding	-	ENSG00000107796
ACTA2-AS1	10	90694655-90695330	-0.0443273	-0.00321043	3.6669e-07	0.736003	0.0516193	0.0401557	0.00980354	0.0697198	0.0388861	0.0156463	0.0207591	0.254101	0.73901	0.000523265	6.60597e-10	8.00601e-09	antisense	+	ENSG00000180139
ACTA2-AS1	10	90697969-90698233	-0.0443951	-0.00305135	5.64626e-07	0.739944	0.0514783	0.0347147	0.0114898	0.10337	0.0160741	0.00995251	0.0763058	0.255006	0.943204	9.56665e-05	0.176726	3.80036e-10	antisense	+	ENSG00000180139
ACTA2-AS1	10	90699152-90699731	-0.045341	-0.00458405	8.81477e-08	0.624797	0.0427304	0.0404369	0.0276936	0.0630384	0.0325208	-0.0183862	0.0808231	0.262498	0.791588	7.78814e-05	0.120877	5.67024e-10	antisense	+	ENSG00000180139
ACTG2	2	74128403-74128932	NA	-0.000881707	NA	0.925377	NA	0.0280864	NA	0.194391	NA	NA	0.142619	0.275702	NA	2.93113e-06	NA	0.184114	protein_coding	+	ENSG00000163017
ACTG2	2	74129487-74130316	-0.0119389	-0.00366136	0.187935	0.696311	0.00408528	0.0245821	0.843647	0.255184	-0.0527489	-0.0323988	0.115042	0.282898	0.534951	5.25842e-06	0.156956	0.218659	protein_coding	+	ENSG00000163017
ACTG2	2	74135417-74135978	-0.0192721	-0.00248983	0.0355929	0.789214	-0.00282506	0.0293246	0.892632	0.171667	-0.0471957	-0.0492965	0.131076	0.28325	0.488689	2.32214e-06	0.117442	0.151112	protein_coding	+	ENSG00000163017
ACTG2	2	74136182-74136266	NA	0.000993133	NA	0.915777	NA	0.0307198	NA	0.156694	NA	NA	0.11677	0.297075	NA	2.15184e-06	NA	0.198516	protein_coding	+	ENSG00000163017
ACTG2	2	74140612-74140773	-0.0197326	-0.00116616	0.0306594	0.901467	-0.00704632	0.0248282	0.735835	0.252196	-0.0524786	-0.0072276	0.120525	0.303161	0.637496	1.14554e-06	0.256235	0.217337	protein_coding	+	ENSG00000163017
ACTG2	2	74141807-74141998	-0.0185621	-0.00279876	0.0425089	0.766315	0.00101474	0.0228774	0.961275	0.291859	-0.0861478	-0.0155722	0.111133	0.292421	0.294137	3.58659e-06	0.0742049	0.129527	protein_coding	+	ENSG00000163017
ACTN1	14	69340860-69341863	-0.0119615	0.00720232	0.119369	0.441537	0.0159103	0.00554957	0.375781	0.79663	-0.0399646	0.00289616	0.142899	0.269836	0.711621	4.34328e-06	0.300439	4.05886e-10	protein_coding	-	ENSG00000072110
ACTN1	14	69343799-69345786	-0.00255015	0.00126054	0.738987	0.890796	-0.00473394	-0.0167171	0.790719	0.429484	0.0471553	-0.0741772	0.208155	0.295017	0.246689	1.53176e-08	0.347348	0.0644523	protein_coding	-	ENSG00000072110
ACTN1	14	69346581-69346825	0.00141841	0.00377359	0.858839	0.668729	-0.00706861	0.0084248	0.702167	0.676775	0.00857596	-0.107093	0.214128	0.219992	0.143226	3.37071e-07	0.153106	0	protein_coding	-	ENSG00000072110
ACTN1	14	69349175-69349309	0.00695873	0.00680703	0.379725	0.401952	0.00205634	0.0093768	0.911002	0.614357	0.0148875	-0.151211	0.19502	0.179738	0.0211472	1.9187e-06	0.089211	9.94617e-11	protein_coding	-	ENSG00000072110
ACTN1	14	69349590-69349772	-0.0049596	0.00666736	0.550826	0.435035	-0.00662019	0.0258096	0.730842	0.186445	0.0226742	-0.136867	0.204002	0.177307	0.0524866	3.09561e-06	0.239601	0.121291	protein_coding	-	ENSG00000072110
ACTN1	14	69350885-69351025	-0.00352418	0.00677856	0.665011	0.442482	-0.000808693	0.0231146	0.965838	0.254911	0.00616944	-0.0935456	0.22711	0.195066	0.247223	6.12517e-07	1.10764e-13	0.147057	protein_coding	-	ENSG00000072110
ACTN1	14	69358770-69359000	0.0058058	0.00328767	0.498688	0.679984	0.00256384	0.0264519	0.897605	0.147528	0.00362417	-0.0868368	0.194738	0.142717	0.340002	9.16282e-06	0.198285	1.77476e-11	protein_coding	-	ENSG00000072110
ACVR1B	12	52387769-52390862	0.0409912	-0.00162381	9.51555e-06	0.863046	-0.0409515	0.0251692	0.0537716	0.247814	0.132433	-0.0257388	-0.0272902	0.0909833	0.0660006	0.344211	0.348861	0.0496476	protein_coding	+	ENSG00000135503
ADAM19	5	156904312-156908010	-0.0414866	0.0116594	8.14403e-06	0.222749	0.0524971	0.0059953	0.0158825	0.784896	0.102351	-0.0357276	0.189691	0.147069	0.195556	0.000374512	0.576708	2.74843e-17	protein_coding	-	ENSG00000135074
ADAMTS1	21	28208606-28210597	-0.0409216	0.0169128	6.5342e-06	0.0460093	0.0451507	-0.0740582	0.0321239	0.000169451	0.206427	-0.0373732	0.0916779	0.113667	0.00155773	0.0253143	0	0.136903	protein_coding	-	ENSG00000154734
ADAMTS17	15	100511794-100514767	-0.0433867	-0.0066831	2.73638e-06	0.484117	0.0350326	-0.0312821	0.102394	0.155746	-0.0256338	-0.0275367	0.110778	0.0570678	0.816222	0.110867	0.28699	0.175303	protein_coding	-	ENSG00000140470
ADAMTS18	16	77316025-77317968	-0.0704052	NA	2.22045e-16	NA	0.138493	NA	7.88036e-12	NA	-0.00823822	-0.00574357	NA	NA	0.982374	NA	0.0403535	NA	protein_coding	-	ENSG00000140873
ADAMTS18	16	77323161-77323308	-0.0568325	NA	2.44897e-11	NA	0.130711	NA	5.40377e-11	NA	0.0652315	0.0360378	NA	NA	0.358255	NA	0.0104072	NA	protein_coding	-	ENSG00000140873
ADAMTS18	16	77325163-77325375	-0.050414	NA	7.47114e-09	NA	0.115598	NA	2.31774e-08	NA	0.00887304	0.0706282	NA	NA	0.48597	NA	0.0449134	NA	protein_coding	-	ENSG00000140873
ADAMTS18	16	77326973-77327155	-0.0566988	NA	7.19851e-11	NA	0.110943	NA	5.58106e-08	NA	0.0349111	0.0296546	NA	NA	0.705	NA	0.0391586	NA	protein_coding	-	ENSG00000140873
ADAMTS18	16	77328820-77329024	-0.0571212	NA	2.63087e-11	NA	0.112017	NA	2.61069e-08	NA	0.0391917	0.00920014	NA	NA	0.752079	NA	0	NA	protein_coding	-	ENSG00000140873
ADAMTS18	16	77353746-77353990	-0.0552469	NA	2.04716e-10	NA	0.10722	NA	1.30392e-07	NA	-0.014647	0.0512501	NA	NA	0.667252	NA	0.0740276	NA	protein_coding	-	ENSG00000140873
ADAMTS4	1	161159538-161161354	-0.0525171	-0.00867127	2.74759e-10	0.342829	0.088805	0.036991	4.11174e-06	0.0765253	0.110026	0.0107664	0.241577	0.152589	0.0977199	4.13258e-06	0.367465	0.0437426	protein_coding	-	ENSG00000158859
ADAMTS4	1	161161855-161162030	-0.0400403	NA	3.57599e-06	NA	0.0765461	NA	0.000115886	NA	0.0993439	-0.0367076	NA	NA	0.153618	NA	0.0797344	NA	protein_coding	-	ENSG00000158859
ADAMTS4	1	161163003-161163178	-0.0409642	NA	1.34551e-06	NA	0.081905	NA	2.55667e-05	NA	0.103333	0.0112513	NA	NA	0.138243	NA	1.32384e-16	NA	protein_coding	-	ENSG00000158859
ADAMTS4	1	161163430-161163616	-0.0366863	NA	1.06262e-05	NA	0.0885893	NA	3.65551e-06	NA	0.173478	-0.00702332	NA	NA	0.00316644	NA	0.0522798	NA	protein_coding	-	ENSG00000158859
ADAMTS4	1	161163725-161164011	-0.0337435	NA	4.91844e-05	NA	0.0944051	NA	8.69038e-07	NA	0.178893	-0.0363013	NA	NA	0.00240023	NA	0.123053	NA	protein_coding	-	ENSG00000158859
ADAMTS4	1	161165255-161165541	-0.0293053	NA	0.000677262	NA	0.11427	NA	1.31288e-08	NA	0.135627	-0.0233142	NA	NA	0.0379337	NA	0	NA	protein_coding	-	ENSG00000158859
ADAMTS4	1	161165769-161166670	-0.0410019	0.00978234	6.57393e-07	0.27195	0.0738476	0.0249559	8.45672e-05	0.219533	0.166597	0.0153138	0.102363	0.139456	0.00385609	0.00844705	0.069072	0	protein_coding	-	ENSG00000158859
ADAMTS4	1	161167785-161168846	-0.0388129	0.00181003	6.20801e-06	0.831296	0.0816026	0.0115463	3.66146e-05	0.552056	0.152495	0.00911942	0.18642	0.048621	0.0151056	0.0013319	0.120781	3.42443e-11	protein_coding	-	ENSG00000158859
ADAMTS5	21	28290231-28296939	-0.0387945	-0.00109814	9.1492e-06	0.861406	0.0488108	-0.00730042	0.0177613	0.615327	-0.0360678	-0.0877494	0.0793286	-0.0970196	0.265628	0.0145674	0.483151	0.23966	protein_coding	-	ENSG00000154736
ADCY5	3	123001143-123003583	0.0316508	0.00791432	0.000470542	0.400241	-0.0073603	0.0181258	0.723637	0.402804	0.00471767	0.0927957	0.193662	0.258892	0.310778	8.75369e-07	0.0431539	0	protein_coding	-	ENSG00000173175
ADCY5	3	123014931-123015063	0.0120919	0.0225757	0.187594	0.0125947	-0.00698475	0.0131938	0.741932	0.52242	0.0712592	0.0525267	0.190786	0.203123	0.307315	7.81263e-06	1.65299e-08	0	protein_coding	-	ENSG00000173175
ADCY5	3	123049736-123049863	0.0433651	NA	1.28447e-06	NA	0.0110387	NA	0.587136	NA	0.0884291	-0.0164537	NA	NA	0.269438	NA	0.00815169	NA	protein_coding	-	ENSG00000173175
ADH1B	4	100239942-100242071	0.0122263	-0.00538508	0.0988938	0.484583	-0.0179034	-0.039575	0.311667	0.026165	0.0180711	0.0512651	0.0428381	-0.282232	0.56487	6.44514e-07	0.330587	0.402399	protein_coding	-	ENSG00000196616
ADIPOQ	3	186571973-186576252	0.00936499	0.0122979	0.249273	0.189571	-0.00196969	0.0190135	0.918169	0.379723	0.0175558	0.0994418	0.222253	0.216794	0.197032	1.54888e-06	0.254024	9.95403e-15	protein_coding	+	ENSG00000181092
ADIPOQ-AS1	3	186571922-186573912	0.014162	0.0128922	0.0751972	0.170739	-0.000784145	0.0168867	0.966173	0.43571	0.0215568	0.0317662	0.23195	0.193687	0.764408	2.55887e-06	0.0972767	0	antisense	-	ENSG00000226482
ADRA1B	5	159343790-159344861	0.0434196	0.0193595	3.20206e-06	0.0302444	-0.0389075	0.0185862	0.0699458	0.360361	-0.0320275	-0.0403855	0.0227803	0.0644418	0.680253	0.493727	0.214553	0.197717	protein_coding	+	ENSG00000170214
AGAP11	10	88759206-88761493	0.0383059	0.000680115	1.64644e-06	0.922215	-0.00383936	-0.0100015	0.83435	0.528992	0.126773	0.0930078	0.036187	0.0383877	0.00735222	0.47703	0.00534541	0.413667	processed_transcript	+	ENSG00000151303
AHNAK	11	62201016-62201363	-0.0234614	-0.0393997	0.00546674	4.15251e-07	0.0019188	0.0370846	0.921956	0.0359196	-0.182263	-0.0573266	-0.146444	-0.124427	0.00151454	0.000362325	3.00218e-09	0.193498	protein_coding	-	ENSG00000124942
AHNAK	11	62259204-62259303	-0.0171836	-0.0436144	0.0458395	2.70115e-07	0.012488	0.0449099	0.531931	0.0203136	-0.159282	-0.0750911	-0.116724	-0.139035	0.00481052	0.00305956	1.47418e-15	0.140171	protein_coding	-	ENSG00000124942
AHR	7	17373536-17373738	0.00239491	0.00290713	0.76883	0.630498	0.0147938	-0.00504913	0.435414	0.71367	-0.0462202	-0.0814025	-0.0585827	-0.224321	0.226595	4.84119e-08	0.068374	0.14274	protein_coding	+	ENSG00000106546
AKAP1	17	55191820-55191997	-0.00236306	-0.00116797	0.788998	0.898534	0.0105981	0.00821262	0.610361	0.695805	0.0341649	0.0404585	0.174728	0.28997	0.656184	9.84826e-08	0.393058	0	protein_coding	+	ENSG00000121057
AKAP1	17	55193472-55193622	-0.000663036	0.00658646	0.940738	0.458934	0.0190751	0.00621397	0.363614	0.759938	0.0144855	-0.00990038	0.154674	0.255191	0.957728	1.19708e-06	0.471292	0	protein_coding	+	ENSG00000121057
AKIRIN1	1	39469717-39471731	-0.0312966	-0.0125113	0.000363535	0.116595	0.0238411	-0.00726045	0.242452	0.689467	0.239569	0.0884014	0.223933	0.21155	2.5326e-05	8.48109e-09	0.0492454	0.0587291	protein_coding	+	ENSG00000174574
AKT1	14	105258935-105260865	0.00681159	-0.0117587	0.443414	0.19673	0.0196994	0.0240072	0.343774	0.249247	0.106489	0.15977	0.251746	0.166968	0.00481102	1.00511e-06	1.03159e-09	0.176852	protein_coding	-	ENSG00000142208
ALDH4A1	1	19197926-19199451	0.00344349	0.0317485	0.704546	8.35214e-06	0.0282631	-0.0611854	0.18988	0.00015722	-0.0350166	0.0407219	-0.0252173	0.109344	0.695628	0.0625308	0.158109	0.293442	protein_coding	-	ENSG00000159423
ALG9	11	111656876-111657244	-0.0450043	-0.011076	7.68683e-08	0.174982	0.00797297	-0.0172426	0.675086	0.355007	-0.142701	0.0248027	-0.110896	0.025518	0.0199856	0.090089	0.0338535	1.84247e-10	protein_coding	-	ENSG00000086848
ALG9	11	111657010-111657244	-0.0415139	-0.0139318	4.07538e-07	0.0776547	0.00771496	-0.0175097	0.67914	0.330838	-0.124855	0.0265505	-0.128473	0.054336	0.0441508	0.0243933	0.0427799	1.32302e-12	protein_coding	-	ENSG00000258529
ALPK3	15	85411342-85416713	0.0147531	-0.00617073	0.0443458	0.512493	-0.0233746	0.0200376	0.181916	0.354142	0.0720811	0.134361	0.174957	0.338554	0.00879335	6.33042e-09	0.573723	2.00581e-10	protein_coding	+	ENSG00000136383
ALS2CL	3	46720700-46722897	0.0479586	-0.0174867	3.96193e-07	0.0649612	-0.0697018	-0.0334076	0.00150693	0.126838	0.153001	0.0146029	0.0473747	-0.00352114	0.0338176	0.73166	0.216888	0.092732	protein_coding	-	ENSG00000178038
AMACR	5	33986283-33989607	-0.0434017	-0.0159708	1.52096e-06	0.054327	0.0432468	0.0158083	0.0440085	0.405962	0.0787972	0.0556374	0.12396	0.0260482	0.259523	0.047567	0.625865	0.311339	protein_coding	-	ENSG00000242110
ANGPTL5	11	101761405-101762329	-0.00994637	-0.00465109	0.2764	0.59924	-0.0145829	-0.0742109	0.491719	0.000312306	-0.0748061	-0.112085	0.0429174	-0.313863	0.0705353	1.76947e-06	0.334519	0.127214	protein_coding	-	ENSG00000187151
ANKMY2	7	16639401-16640570	-0.0395404	-0.0186965	4.75714e-06	0.0140156	0.0729057	-0.00059572	0.000244251	0.972812	-0.0157268	0.124656	0.0376599	0.146675	0.102606	0.0108033	1.62945e-10	3.62977e-09	protein_coding	-	ENSG00000106524
ANKRD12	18	9280939-9285206	0.0353491	-0.00136205	8.27116e-06	0.855571	-0.0485233	-0.0359502	0.00797537	0.0384632	0.00163868	-0.0910881	0.0289264	0.0396682	0.235093	0.591251	0.49366	0.0441488	protein_coding	+	ENSG00000101745
ANKRD29	18	21178890-21181273	0.0416694	-0.000142163	9.2291e-07	0.985546	-0.0483132	-0.0117772	0.0143601	0.517405	0.0355013	-0.122175	0.0516586	0.0527656	0.0934977	0.333228	0.344159	0	protein_coding	-	ENSG00000154065
ANKRD52	12	56631591-56637176	-0.0085763	-0.00565574	0.34979	0.527888	0.0233226	4.21631e-05	0.280196	0.998366	0.315555	0.0981128	0.23004	0.16148	2.03253e-07	4.27593e-06	0.00348523	0.100211	protein_coding	-	ENSG00000139645
AOX1	2	201485373-201485542	-0.000970079	0.00478617	0.91547	0.541761	0.00606334	-0.00512719	0.778285	0.774268	-0.00980108	-0.128591	0.0871323	-0.322332	0.127112	8.25478e-09	0.115603	1.55171e-10	protein_coding	+	ENSG00000138356
AOX1	2	201485843-201485969	-0.004548	-0.00757802	0.617903	0.354071	0.00540377	0.000593068	0.80258	0.974728	-0.0340206	-0.107869	0.0601038	-0.317426	0.194966	8.73306e-08	4.71375e-10	5.50608e-11	protein_coding	+	ENSG00000138356
AOX1	2	201499514-201499638	-0.00867708	-0.00285037	0.332618	0.725796	0.0148447	-0.0192416	0.485506	0.301223	-0.0650717	-0.127793	0.0246319	-0.312262	0.062353	1.62876e-07	0	0.0460576	protein_coding	+	ENSG00000138356
AOX1	2	201507333-201507526	-0.00938316	-0.00902839	0.285954	0.296197	-0.00364603	0.00450346	0.862244	0.820445	-0.0102658	-0.0640726	0.0413758	-0.285775	0.572769	8.48462e-06	0.112475	0	protein_coding	+	ENSG00000138356
AOX1	2	201515697-201515924	-0.0123574	-0.0132027	0.162241	0.131279	0.00276254	-0.0166058	0.895317	0.407243	-0.000607859	-0.0885634	0.0714243	-0.297962	0.359521	3.08026e-06	0.12346	0.0803498	protein_coding	+	ENSG00000138356
AOX1	2	201521565-201521660	-0.0111369	-0.00465112	0.207309	0.602202	0.00308985	0.00618362	0.881914	0.762691	-0.0171571	-0.0820276	0.0837816	-0.300411	0.383252	3.31217e-06	0.086857	0	protein_coding	+	ENSG00000138356
AOX1	2	201523888-201524016	-0.0108568	-0.00317918	0.204642	0.72015	0.0101173	0.0144611	0.616044	0.479156	-0.0312131	-0.0945124	0.13887	-0.352302	0.229832	1.23632e-08	0.263267	6.53433e-15	protein_coding	+	ENSG00000138356
AOX1	2	201533338-201533526	-0.0169151	-0.0159885	0.0483576	0.0781434	0.0103111	-0.0178466	0.616014	0.387431	-0.0395304	-0.101114	0.0592192	-0.299338	0.183489	6.18802e-06	0.298549	0.189062	protein_coding	+	ENSG00000138356
AOX1	2	201534298-201534465	-0.0202831	-0.024589	0.0154604	0.0067831	0.00415696	-0.040725	0.837448	0.0505387	-0.0245904	-0.0808488	0.0422992	-0.301758	0.352686	6.59319e-06	0.456485	2.20368e-16	protein_coding	+	ENSG00000138356
AOX1	2	201535352-201536214	-0.0224057	-0.0231001	0.00746646	0.00790761	0.0068055	-0.0481422	0.731763	0.0161516	-0.0691997	-0.0705916	0.0055992	-0.347905	0.194649	4.75229e-08	0.218866	0.046967	protein_coding	+	ENSG00000138356
AP002954.3	11	118507338-118508580	0.0404094	0.00544574	8.60446e-09	0.460912	-0.0148184	-0.00149711	0.353756	0.92925	-0.0404113	0.00740316	0.0204647	0.0583967	0.639905	0.437955	0.367302	0.332538	antisense	+	ENSG00000255176
AP002954.3	11	118508671-118508815	0.0349247	NA	8.48867e-06	NA	-0.0139018	NA	0.43613	NA	0.0703583	-0.0109575	NA	NA	0.342907	NA	0	NA	antisense	+	ENSG00000255176
APLN	X	128779240-128781894	-0.0459734	-0.0448267	2.41097e-08	1.06418e-06	0.0704149	0.0561754	0.000245683	0.00754325	0.0556513	-0.0712475	0.106179	-0.0800345	0.272315	0.0932314	0.279466	0.159008	protein_coding	-	ENSG00000171388
AQP7P1	9	67289184-67289492	0.0401786	NA	4.52789e-06	NA	-0.0730829	NA	0.000355796	NA	-0.0152533	0.0128813	NA	NA	0.942645	NA	0.390727	NA	pseudogene	-	ENSG00000186466
ARHGAP28	18	6912059-6915715	-0.0549069	-0.0117481	4.328e-11	0.108164	0.054791	-0.0120555	0.0041619	0.47276	-0.0989225	-0.118793	0.0616806	0.0499538	0.0126521	0.216285	0.290663	0.539886	protein_coding	+	ENSG00000088756
ARHGAP8	22	45258155-45258665	-0.05476	-0.0343166	2.19781e-10	7.40759e-05	0.0611774	0.0359955	0.00184151	0.0698592	-0.12254	0.0484589	0.124275	0.17497	0.0540501	0.000557811	2.77638e-09	0.106541	protein_coding	+	ENSG00000241484
ARHGEF2	1	155916645-155917806	-0.0343316	-0.011938	8.1473e-05	0.201829	0.091029	0.0390744	9.12411e-06	0.0699248	0.129466	0.0431986	0.105637	0.175465	0.046954	0.00350855	1.05692e-09	8.68582e-12	protein_coding	-	ENSG00000116584
ARHGEF2	1	155920060-155920273	-0.02668	0.000326337	0.00308946	0.9706	0.0608389	0.0545016	0.00386374	0.00740403	0.15726	-0.0154044	0.248617	0.158795	0.0230029	8.86611e-07	0.0422838	0	protein_coding	-	ENSG00000116584
ARID1A	1	27105514-27108595	0.0266466	0.00295395	0.00254888	0.736712	0.00621604	0.00059113	0.761909	0.97674	0.286943	0.0246437	0.231898	0.134394	2.02253e-06	9.76729e-06	0.358449	0.152068	protein_coding	+	ENSG00000117713
ARL4A	7	12727791-12730559	-0.0498536	-0.0213351	2.02062e-09	0.00760071	0.0359847	0.0276896	0.0584978	0.137489	-0.0221285	0.048662	-0.0143709	0.0878174	0.637273	0.278239	0.324264	0.0952517	protein_coding	+	ENSG00000122644
ARMCX6	X	100870110-100871756	-0.0213262	-0.00473439	0.0233597	0.593731	0.00182263	0.0151411	0.933613	0.456831	0.101513	0.0125843	0.218306	0.173186	0.223133	5.65986e-06	0.0458486	2.17143e-12	protein_coding	-	ENSG00000198960
ARNTL	11	13375848-13376178	-0.0468102	-0.0381525	7.97383e-08	2.12245e-05	0.0891993	0.115868	8.13445e-06	2.62531e-08	0.0656421	0.0598555	0.085182	0.0154684	0.254178	0.294455	0.061913	0.700989	protein_coding	+	ENSG00000133794
ARNTL	11	13378286-13378644	NA	-0.0453579	NA	3.94503e-07	NA	0.0572715	NA	0.00497295	NA	NA	0.133191	0.0559194	NA	0.0315678	NA	0.130387	protein_coding	+	ENSG00000133794
ARNTL	11	13379981-13380138	-0.0492094	-0.042863	1.3651e-08	4.88731e-07	0.0940963	0.0858793	2.26478e-06	9.78569e-06	0.0972649	0.00691035	0.101504	0.055148	0.18111	0.0827724	4.45861e-19	0.260697	protein_coding	+	ENSG00000133794
ARNTL	11	13381892-13381971	-0.0513436	-0.0475648	4.2795e-09	1.78806e-08	0.0577375	0.0732358	0.00356015	0.000134498	0.0523015	-0.0473449	0.10959	0.0838827	0.462517	0.0280782	0	0.0514165	protein_coding	+	ENSG00000133794
ARNTL	11	13386963-13387139	-0.0448393	-0.0470312	1.85476e-07	2.24519e-08	0.0897705	0.0967741	5.22356e-06	4.25946e-07	-0.00422317	-0.105097	0.126794	-0.0119754	0.178026	0.0481092	0	1.58808e-12	protein_coding	+	ENSG00000133794
ARNTL	11	13388212-13388329	-0.0524208	-0.048057	3.0566e-09	1.72681e-07	0.0993359	0.0999909	1.13353e-06	2.26579e-06	0.0812732	-0.00806238	0.157599	0.0575043	0.329055	0.0122617	4.78093e-18	1.70047e-09	protein_coding	+	ENSG00000133794
ARNTL	11	13391165-13391314	-0.0606569	-0.0506211	3.15548e-12	8.84881e-09	0.0874532	0.106752	9.81934e-06	1.41238e-07	0.0524408	-0.0219944	0.115351	0.0675928	0.582603	0.0458013	1.95503e-09	0	protein_coding	+	ENSG00000133794
ARNTL	11	13393710-13393956	-0.0617641	-0.0568804	3.20433e-12	4.98686e-11	0.0902394	0.0877023	8.80356e-06	1.00449e-05	0.0478336	0.013154	0.109663	0.0913636	0.649461	0.0284238	3.54165e-10	2.64563e-13	protein_coding	+	ENSG00000133794
ARNTL	11	13395640-13395748	-0.0470517	-0.05736	7.2401e-08	4.18565e-11	0.0792632	0.0816295	7.82502e-05	3.4395e-05	0.0225758	-0.0499537	0.0355725	0.178227	0.647054	0.00609769	4.33115e-11	4.04213e-14	protein_coding	+	ENSG00000133794
ARNTL	11	13397159-13397309	-0.0518216	-0.0446321	6.27159e-09	5.64845e-07	0.122084	0.10285	4.01041e-09	6.31958e-07	0.0121883	-0.0320747	0.0395605	0.190823	0.849563	0.00420218	5.73768e-09	0.162882	protein_coding	+	ENSG00000133794
ARNTL	11	13398092-13398318	-0.0622209	-0.0393464	4.16711e-12	7.44228e-06	0.078864	0.0744635	0.000109194	0.000216948	-0.021939	0.123885	0.109416	0.115614	0.106955	0.0147061	6.99259e-19	0	protein_coding	+	ENSG00000133794
ARNTL	11	13399884-13402801	-0.0841363	-0.054904	2.2e-16	4.58589e-11	0.10836	0.0874349	1.58462e-08	4.81773e-06	-0.0134274	0.0188321	0.121171	0.0119563	0.915893	0.062312	0	0.0611923	protein_coding	+	ENSG00000133794
ARNTL	11	13407236-13407338	-0.0702876	-0.0531615	2.66454e-15	1.73194e-10	0.116527	0.0649868	1.03268e-08	0.000562777	0.0211734	-0.0433351	0.0882625	0.0773478	0.713043	0.07028	0.502822	0	protein_coding	+	ENSG00000133794
ARNTL	11	13408143-13408813	-0.0717525	-0.0605694	2.2e-16	1.53211e-14	0.158299	0.092086	4.21885e-15	2.88195e-07	-0.00286498	0.00621945	0.0539471	0.0918775	0.99294	0.0991837	0.216175	3.3214e-09	protein_coding	+	ENSG00000133794
ARPC1A	7	98963514-98963885	-0.00184004	-0.00516735	0.833346	0.518192	-0.0071365	-0.0129139	0.72399	0.478722	-0.0720211	0.0920334	-0.255111	0.0951274	0.143906	1.06866e-06	0.138163	0.366832	protein_coding	+	ENSG00000241685
ARSJ	4	114821440-114824831	-0.0241146	-0.00207088	0.0053553	0.786755	0.0019093	0.0181773	0.923509	0.299789	0.0596364	-0.128374	0.141239	0.19438	0.0563268	5.55522e-06	0.262882	0.0735181	protein_coding	-	ENSG00000180801
ASCC2	22	30197983-30198197	0.00121829	-0.00384961	0.885518	0.62983	-0.0276919	0.0135544	0.160066	0.456773	-0.00605049	0.135955	0.0762766	0.276745	0.0716044	3.69933e-07	0.553529	1.44462e-10	protein_coding	-	ENSG00000100325
ASRGL1	11	62159551-62160882	-0.0398083	-0.00873933	8.82299e-07	0.353005	0.0282763	0.000798977	0.130254	0.970412	0.0115115	-0.058483	0.0156948	0.218897	0.558018	0.00252277	1.93529e-13	0.491974	protein_coding	+	ENSG00000162174
ATAD3B	1	1418865-1420551	-0.0278901	-0.0145734	0.000751363	0.123714	0.0326782	-0.0114383	0.0875757	0.600068	0.239258	0.148621	0.133666	0.14435	8.79033e-07	0.00524162	0	0.0833941	protein_coding	+	ENSG00000160072
ATOH8	2	85981017-85982080	0.0430873	0.0232004	4.08801e-08	0.0037357	0.00158134	-0.0319894	0.929872	0.0803101	0.140321	-0.00931753	-0.00861664	-0.125968	0.0160843	0.063199	0.344	0	protein_coding	+	ENSG00000168874
ATOH8	2	85991114-85991305	0.0411286	0.0111211	3.03443e-06	0.196304	-0.00703626	-0.0607957	0.727182	0.00215779	0.0841432	-0.0636195	-0.03474	-0.149509	0.185728	0.0288407	0.256374	0.157356	protein_coding	+	ENSG00000168874
ATP13A2	1	17312958-17313451	-0.0167714	0.000873132	0.0200451	0.906549	0.026832	0.00682255	0.112972	0.690219	0.0656392	0.0225478	0.0695235	0.236746	0.31679	5.23871e-06	0.0683754	0.189516	protein_coding	-	ENSG00000159363
ATP13A3	3	194123401-194126845	-0.0368248	-0.0103942	3.28298e-06	0.112352	0.0800964	-0.00499978	1.39129e-05	0.740916	-0.00523395	-0.0711062	0.110092	0.0420484	0.40994	0.0156492	0	0.100623	protein_coding	-	ENSG00000133657
AUTS2	7	70254734-70258054	0.0343566	-0.00865069	0.000156511	0.27577	-0.117625	0.00771343	4.66177e-08	0.674391	0.00500251	0.0440476	0.0503746	0.203447	0.770818	0.000437495	0.0179564	0.154881	protein_coding	+	ENSG00000158321
AXIN1	16	339440-343718	-0.00495571	-0.0114037	0.547435	0.145569	0.0334854	0.0120129	0.0799423	0.501886	0.181311	0.096058	0.13245	0.23216	0.000410008	1.10393e-06	0.157516	9.12926e-09	protein_coding	-	ENSG00000103126
B4GALT2	1	44455970-44456840	-0.00497489	0.0334529	0.514934	3.76385e-07	0.0101938	-0.0397459	0.566646	0.00758385	-0.0896089	0.0198365	-0.0345175	-0.00895752	0.17381	0.668605	0	0	protein_coding	+	ENSG00000117411
B9D1	17	19265820-19266046	0.00522915	0.0407965	0.551944	5.59772e-06	0.0102503	-0.0265085	0.610679	0.191173	0.0814606	0.0638103	-0.00477648	-0.0492155	0.166287	0.702015	0.0562246	0	protein_coding	-	ENSG00000108641
BAZ1A	14	35221937-35222910	-0.0414335	-0.013273	2.88317e-06	0.102336	0.0637538	-0.0230224	0.00182823	0.221127	0.0547419	0.0438419	0.0347572	0.0920047	0.455592	0.186292	2.19028e-17	0	protein_coding	-	ENSG00000198604
BCAS3	17	59067332-59067596	0.0125049	0.048115	0.165295	9.25613e-08	-0.0120236	-0.00845116	0.559796	0.676669	-0.0334072	-0.0990499	-0.0082579	0.0662615	0.202874	0.539591	8.52534e-10	0	protein_coding	+	ENSG00000141376
BCL2	18	60790579-60795992	0.0410807	0.0205423	2.13002e-07	0.000488585	-0.0272686	-0.014508	0.132942	0.27906	0.00188144	-0.021006	0.0305464	-0.00948952	0.924783	0.694562	0.571997	0.530483	protein_coding	-	ENSG00000171791
BHLHE40	3	5024521-5027008	0.040387	0.0285263	7.67161e-06	0.00239458	-0.0465411	-0.0177874	0.0263574	0.40844	0.111577	-0.00126289	0.000922803	-0.0721015	0.145454	0.523512	9.95978e-14	0.329225	protein_coding	+	ENSG00000134107
BHLHE41	12	26272959-26276101	0.0772747	0.0370244	2.2e-16	8.51887e-06	-0.103565	-0.0704616	1.85928e-07	0.000217802	-0.0296107	-0.0222804	0.0785733	0.0805271	0.78712	0.0920549	0.126285	2.07224e-12	protein_coding	-	ENSG00000123095
BHLHE41	12	26276563-26276701	0.0691769	0.0117078	4.44089e-16	0.119287	-0.077789	-0.059484	5.37864e-05	0.000543963	0.035088	-0.0819936	0.0876114	0.0753502	0.286127	0.0455899	0.212467	0	protein_coding	-	ENSG00000123095
BHLHE41	12	26276921-26277112	0.0650326	0.0127574	1.59872e-14	0.103689	-0.0787086	-0.0489148	4.28907e-05	0.00623714	0.0288489	-0.0465417	0.0721771	0.0354345	0.618139	0.240832	0.292567	0	protein_coding	-	ENSG00000123095
BHLHE41	12	26277452-26277515	0.0636851	0.0209204	1.06581e-14	0.00405324	-0.0662206	-0.0109809	0.000376272	0.507257	0.0759387	-0.063097	0.0396272	-0.025433	0.176961	0.613996	0.000362118	0	protein_coding	-	ENSG00000123095
BHLHE41	12	26277651-26278060	0.0694801	0.0308505	2.22045e-16	1.3786e-05	-0.0770045	-0.0307972	4.96875e-05	0.0550824	0.0295749	-0.0434767	0.0713276	0.034126	0.632821	0.184876	5.60452e-11	0.113816	protein_coding	-	ENSG00000123095
BIN1	2	127809831-127814067	0.0180843	-0.00395665	0.049186	0.666693	0.0413366	0.0232649	0.0549382	0.270291	0.243308	0.17389	0.24885	0.12827	3.09173e-06	7.7988e-06	0.210405	0.140375	protein_coding	-	ENSG00000136717
BMX	X	15540469-15540710	-0.0475428	NA	3.16112e-08	NA	0.0472798	NA	0.0152749	NA	-0.0742089	-0.145179	NA	NA	0.0118063	NA	5.61125e-10	NA	protein_coding	+	ENSG00000102010
BMX	X	15574196-15574652	-0.0390607	-0.0148662	2.50228e-06	0.111112	0.0363748	0.0512909	0.0560201	0.017005	-0.0582997	-0.0479047	-0.145632	0.152942	0.355236	0.0041143	0.380254	0	protein_coding	+	ENSG00000102010
BNIP3L	8	26267880-26270645	0.00448339	-0.0356065	0.55053	5.59779e-07	0.00546584	0.0218444	0.759862	0.175519	-0.0575646	0.0719307	0.0692036	-0.0660383	0.21116	0.131663	0.656635	0.226083	protein_coding	+	ENSG00000104765
BPNT1	1	220236099-220236296	-0.0107097	-0.0412437	0.233581	4.23512e-06	0.0427605	-0.0367663	0.0373355	0.0706795	0.0771571	0.0341026	0.0448909	0.077534	0.299194	0.280665	1.6039e-10	0.189706	protein_coding	-	ENSG00000162813
BSCL2	11	62476619-62477317	0.00714931	0.0417548	0.449214	1.0243e-06	0.0286442	0.0104925	0.189524	0.58494	0.0400422	0.0480172	0.0177112	-0.0153365	0.587562	0.916208	3.96142e-11	0.0195607	protein_coding	-	ENSG00000168000
BTG1	12	92536286-92538223	-0.0450473	-0.0169966	4.55804e-07	0.0586344	0.024985	0.0613562	0.222172	0.00346516	-0.0281027	-0.00894548	-0.116837	-0.0961056	0.867281	0.0314877	0.286122	0.277963	protein_coding	-	ENSG00000133639
BTLA	3	112182815-112185230	-0.0395622	-0.0175589	2.36443e-06	0.0436543	0.0181724	-0.000218727	0.340073	0.991169	0.0481353	-0.0491899	0.0717869	-0.043927	0.459084	0.33234	0.251371	2.8413e-12	protein_coding	-	ENSG00000186265
BZW2	7	16720926-16721029	-0.0397705	-0.00134122	9.62024e-06	0.882412	0.00166691	-0.00873881	0.935367	0.67284	-0.0569421	0.0699695	-0.00677792	0.0674122	0.317068	0.541803	0.42668	0.182064	protein_coding	+	ENSG00000136261
C11orf84	11	63590061-63590843	-0.000779218	0.00471702	0.930758	0.601565	0.0959254	0.00554943	4.67574e-06	0.787679	0.150002	0.0311729	0.228431	0.0359263	0.0213719	0.000212248	0.654495	4.26072e-10	protein_coding	+	ENSG00000168005
C11orf95	11	63527364-63531504	-0.00584709	-0.00401861	0.539784	0.639123	0.0439282	0.03285	0.0504576	0.0951847	0.244032	0.0929511	0.230988	0.142843	0.000118167	3.28748e-06	0.0987853	7.7448e-09	lincRNA	-	ENSG00000188070
C11orf96	11	43963816-43965888	-0.0446232	-0.0021067	6.18775e-09	0.817576	0.0851011	0.0314649	1.64829e-06	0.135144	0.104462	0.0459859	0.0669496	0.234001	0.0539151	0.000353633	0.189953	0.00774832	protein_coding	+	ENSG00000187479
C12orf23	12	107372128-107372556	0.00228161	-0.0386579	0.790613	9.37095e-06	0.0509865	0.0309798	0.0105546	0.122586	0.00185264	-0.029669	0.0297988	0.0339643	0.878504	0.71536	0.185952	0	protein_coding	+	ENSG00000151135
C12orf66	12	64580096-64581432	-0.0433277	-0.00317611	2.02598e-07	0.710261	0.0562207	-0.0440584	0.00339417	0.0268961	0.0151033	-0.022974	0.019345	0.112063	0.886704	0.141754	0	0	protein_coding	-	ENSG00000174206
C12orf76	12	110487165-110489103	NA	-0.042471	NA	3.73034e-06	NA	0.0119974	NA	0.564883	NA	NA	0.0543662	0.141953	NA	0.0366826	NA	0.241679	protein_coding	-	ENSG00000174456
C14orf80	14	105958444-105958646	0.00305429	0.00704298	0.71688	0.386726	-0.0163708	-0.0894788	0.396936	1.76689e-06	0.0689665	-0.000385115	-0.0415886	0.135392	0.41405	0.036806	0.0772473	0	protein_coding	+	ENSG00000185347
C14orf80	14	105960491-105964314	0.0077278	0.0129869	0.358554	0.119162	-0.0245506	-0.094823	0.206439	1.03347e-06	0.111386	0.207704	0.0136412	0.216788	0.000112879	0.000623587	0.250058	2.02234e-17	protein_coding	+	ENSG00000185347
C14orf80	14	105964954-105965912	0.00235662	0.0182432	0.763163	0.0172522	-0.0115549	-0.085275	0.521395	1.68111e-06	0.0174244	0.148717	-0.0368246	0.165899	0.0178561	0.00525644	0.4762	0	protein_coding	+	ENSG00000185347
C15orf39	15	75498340-75501165	0.0424002	0.0168379	1.09999e-06	0.0306679	-0.0197977	0.0295328	0.323117	0.100188	0.167075	0.100786	0.0623245	-0.0990856	0.00188932	0.0937197	0.165309	0.0552054	protein_coding	+	ENSG00000167173
C17orf58	17	65987218-65988219	-0.0597992	-0.018644	1.282e-11	0.0221503	0.0434967	-0.0233191	0.0298016	0.210385	-0.0559957	0.00149274	0.0846795	0.114354	0.58261	0.0218598	0.195933	0.0955661	protein_coding	-	ENSG00000186665
C17orf58	17	65989017-65989765	-0.0428348	-0.00902982	2.64676e-06	0.320468	0.0375491	-0.0222281	0.0750469	0.283316	-0.0549726	-0.039592	0.19339	0.140296	0.500276	0.000141267	1.68829e-06	0	protein_coding	-	ENSG00000186665
C19orf12	19	30190483-30193884	0.0572149	-0.00538347	1.97796e-10	0.518587	-0.111361	-0.00334563	1.04046e-07	0.860904	-0.121377	-0.0226193	0.250722	0.0839282	0.0826561	2.7491e-06	0.224289	0.18661	protein_coding	-	ENSG00000131943
C19orf12	19	30199161-30199330	0.0396406	0.00427604	1.28478e-06	0.639902	-0.0569656	0.0368397	0.00221916	0.0767328	-0.020278	-0.012315	0.174725	0.0513665	0.896213	0.00490995	2.55218e-18	0	protein_coding	-	ENSG00000131943
C1QTNF1	17	77021745-77022017	0.0471196	0.00558206	6.46846e-07	0.542967	-0.0509732	-0.0133156	0.0200193	0.525092	0.00622901	-0.0240672	0.026304	0.0294694	0.928584	0.786876	0.341088	7.72858e-12	protein_coding	+	ENSG00000173918
C1QTNF3	5	33987279-33989607	-0.0434463	-0.0154555	1.39882e-06	0.0615011	0.0413295	0.0139089	0.0541238	0.462827	0.0837236	0.0591652	0.136149	0.0177802	0.217515	0.0279127	0.65141	0.325501	protein_coding	-	ENSG00000082196
C1orf51	1	150255182-150256043	0.07988	0.0533195	2.2e-16	5.12394e-10	-0.129221	-0.138002	7.66365e-12	6.70974e-12	-0.0192455	0.00436533	-0.0368175	0.0657961	0.926375	0.433196	0.241245	2.83064e-11	protein_coding	+	ENSG00000159208
C1orf51	1	150256215-150256290	NA	0.0611751	NA	1.47082e-12	NA	-0.149686	NA	8.79297e-14	NA	NA	-0.141137	0.000666748	NA	0.0293928	NA	0.142592	protein_coding	+	ENSG00000159208
C1orf51	1	150256836-150256914	NA	0.0526244	NA	2.12267e-09	NA	-0.132874	NA	7.55713e-11	NA	NA	-0.108142	-0.000738785	NA	0.136586	NA	1.96926e-11	protein_coding	+	ENSG00000159208
C1orf51	1	150257007-150257945	0.0801887	0.0582912	2.2e-16	1.12959e-11	-0.110264	-0.143912	4.36948e-09	6.8745e-13	-0.0109078	0.0115902	-0.0466439	0.00823434	0.956688	0.677534	0.133672	1.59404e-12	protein_coding	+	ENSG00000159208
C1orf51	1	150258842-150259505	0.0847426	0.0542484	2.2e-16	1.51794e-10	-0.137642	-0.160289	6.9722e-13	1.55431e-15	-0.00885776	0.0123044	-0.13646	0.0614464	0.962282	0.0256206	0.139408	0.171733	protein_coding	+	ENSG00000159208
C3orf58	3	143708352-143711209	-0.0493773	-0.0298353	1.03324e-09	0.00010631	0.0680843	0.0509162	0.000282188	0.0042459	0.0805211	-0.188824	0.153779	0.0621933	0.00102067	0.00273473	0.40196	0.183449	protein_coding	+	ENSG00000181744
C3orf80	3	159943423-159945999	-0.0243683	-0.0445029	0.00558766	1.06979e-06	0.0289305	0.0274518	0.155891	0.183188	-0.0938036	-0.0660185	0.0613806	0.0364508	0.115826	0.438983	0.222808	0.495404	protein_coding	+	ENSG00000180044
C4orf32	4	113107849-113110237	-0.0427328	-0.0226714	4.62917e-07	0.000725809	0.0917495	0.0203286	4.80343e-06	0.186281	0.0353512	-0.0414455	0.0467361	0.0485169	0.644935	0.277553	0.0624314	0.205879	protein_coding	+	ENSG00000174749
C7orf43	7	99752043-99752787	-0.0360016	-0.00986665	1.88101e-06	0.191936	0.0259416	-0.0176544	0.131845	0.309	0.0665042	0.0925594	0.0156709	0.11008	0.0620197	0.0885705	0.0375407	0	protein_coding	-	ENSG00000146826
C7orf43	7	99755712-99756338	-0.0163968	-0.00520451	0.0227221	0.513626	0.0383718	0.000383247	0.0207364	0.983345	0.226281	0.0334179	0.0583853	0.0665981	2.79355e-06	0.21428	0.0360701	0	protein_coding	-	ENSG00000146826
C8orf34	8	69434034-69434206	0.0320669	NA	0.000217249	NA	-0.0882704	NA	9.91332e-06	NA	-0.000764716	-0.0714628	NA	NA	0.460207	NA	0.143038	NA	protein_coding	+	ENSG00000165084
C8orf34	8	69445218-69448062	0.0207036	NA	0.0140928	NA	-0.0899197	NA	5.04284e-06	NA	-0.00705199	0.00432876	NA	NA	0.988619	NA	0.472588	NA	protein_coding	+	ENSG00000165084
C8orf76	8	124243540-124243997	-0.0413688	-0.0324163	3.42461e-06	7.24584e-05	0.0533922	-0.00275383	0.00950152	0.88153	-0.00884496	0.0271836	0.0842521	-0.00805149	0.896057	0.248014	0.167599	0.242939	protein_coding	-	ENSG00000189376
CA9	9	35673853-35674359	NA	-0.040975	NA	4.47547e-06	NA	0.0297323	NA	0.145372	NA	NA	0.114807	0.0257693	NA	0.105625	NA	0.0879325	protein_coding	+	ENSG00000107159
CA9	9	35676061-35676203	NA	-0.0462667	NA	3.98098e-07	NA	0.0364239	NA	0.0763114	NA	NA	0.00837406	0.0622379	NA	0.567299	NA	0.297707	protein_coding	+	ENSG00000107159
CA9	9	35679182-35679339	NA	-0.0499609	NA	3.21652e-08	NA	0.0321181	NA	0.113558	NA	NA	0.0689689	0.010707	NA	0.442082	NA	0.110752	protein_coding	+	ENSG00000107159
CA9	9	35679851-35679995	NA	-0.0476396	NA	1.1443e-07	NA	0.0213179	NA	0.291734	NA	NA	0.12304	0.065831	NA	0.0371284	NA	0.102801	protein_coding	+	ENSG00000107159
CA9	9	35680698-35680831	NA	-0.0421513	NA	4.79611e-06	NA	-0.000218268	NA	0.991662	NA	NA	0.0560968	0.0887908	NA	0.192761	NA	0.278921	protein_coding	+	ENSG00000107159
CALB2	16	71423652-71424341	-0.0145756	0.00035645	0.0969314	0.96813	0.0272368	0.020327	0.186607	0.320752	-0.0945548	0.0447114	0.198908	0.2113	0.196387	2.14403e-06	6.86293e-09	1.65983e-12	protein_coding	+	ENSG00000172137
CAMKK1	17	3763609-3765577	0.0394672	0.0362874	1.45942e-06	8.09049e-06	-0.0918763	-0.0815349	1.46545e-06	1.43816e-05	0.0108203	-0.0248013	0.0129963	0.235904	0.887874	0.000102243	0.313143	0.1811	protein_coding	-	ENSG00000004660
CARS	11	3028109-3030763	0.048493	-0.0130785	5.76691e-08	0.149931	-0.00417124	0.0201297	0.837462	0.33405	0.119104	0.0596163	0.0722268	0.0956773	0.0502615	0.117293	0.236868	0.482568	protein_coding	-	ENSG00000110619
CASQ2	1	116242628-116244047	-0.00147845	-0.00814858	0.871994	0.370485	-0.00674681	0.0224351	0.759936	0.286004	0.0366498	-0.00690925	0.0736509	0.287235	0.827302	7.75049e-06	0.850116	0.221606	protein_coding	-	ENSG00000118729
CAT	11	34489835-34490078	0.00402152	-0.00794341	0.648778	0.323059	-0.016893	0.00481959	0.413984	0.793761	0.0201381	-0.0465089	0.102049	0.230956	0.709823	9.90647e-06	0.151624	0.336631	protein_coding	+	ENSG00000121691
CBFA2T3	16	88941266-88943683	0.0462585	0.00295158	1.91768e-07	0.748461	-0.0877004	-0.0118078	2.58897e-05	0.57643	0.0987086	-0.0835699	-9.72123e-05	-0.00899246	0.0926505	0.989549	0.330151	0.290787	protein_coding	-	ENSG00000129993
CCDC68	18	52568740-52571646	0.047269	-0.00328992	1.71184e-08	0.671784	-0.0741141	-0.0583874	0.000139498	0.00123372	0.130694	0.0163906	0.104473	0.0555251	0.0399108	0.0511816	0.583919	0.0395354	protein_coding	-	ENSG00000166510
CCL21	9	34709002-34709679	-0.00995577	-0.0150548	0.275528	0.0933223	-0.0141106	0.00725107	0.500357	0.727341	-0.115332	-0.0480006	-0.0773111	-0.349585	0.0827485	4.70642e-08	0	0.107884	protein_coding	-	ENSG00000137077
CCL21	9	34709774-34709894	-0.00857988	-0.016357	0.332239	0.0758638	-0.00150469	0.00282293	0.940785	0.894931	-0.0950528	-0.0280342	-0.0673573	-0.361742	0.187565	5.58893e-08	0	0.122296	protein_coding	-	ENSG00000137077
CCL21	9	34709997-34710121	-0.00601008	-0.0160951	0.499457	0.0756372	-0.00631841	-0.000115475	0.757986	0.99561	-0.0571387	-0.0532702	-0.0495518	-0.352222	0.376049	9.18308e-08	2.85182e-08	0.160895	protein_coding	-	ENSG00000137077
CCND2	12	4409026-4414516	-0.0106514	0.00520052	0.23147	0.536975	0.0206601	-0.0207725	0.329844	0.283501	0.0418766	-0.0264943	0.186156	0.186678	0.715248	4.58671e-06	0.480926	0.190051	protein_coding	+	ENSG00000118971
CCND3	6	41902671-41903845	0.0352941	0.0424292	2.20048e-05	4.54874e-07	-0.0603013	-0.0384359	0.00173247	0.0460114	0.0291666	0.0439413	0.0136404	0.0433284	0.614295	0.707448	0.398174	0.000745347	protein_coding	-	ENSG00000112576
CCND3	6	41903934-41904433	0.0386714	0.0378008	4.06569e-06	1.78989e-05	-0.0641137	-0.0221613	0.000899242	0.269819	0.00901815	-0.114687	0.107007	0.0845171	0.12902	0.0459411	0.351946	1.84494e-18	protein_coding	-	ENSG00000112576
CCND3	6	41904522-41905132	0.0468408	0.034184	4.33109e-08	7.89621e-05	-0.0871904	-0.0301515	9.65656e-06	0.124283	0.0545055	-0.128719	0.119969	0.0192717	0.052669	0.0750612	0.289701	2.9256e-08	protein_coding	-	ENSG00000112576
CCND3	6	42016239-42016706	0.0466836	0.0441921	1.55037e-08	6.48566e-08	-0.0808748	-0.0396057	1.8155e-05	0.031495	0.0156244	0.0379797	0.052407	0.0725597	0.74123	0.21937	3.63473e-10	0	protein_coding	-	ENSG00000112576
CD59	11	33738916-33741157	-0.0105838	0.00627905	0.19984	0.461179	0.0140473	0.00474343	0.467796	0.807239	-0.0301076	-0.280691	0.103981	0.125445	4.9679e-06	0.00957776	0.402168	5.11838e-10	protein_coding	-	ENSG00000085063
CEBPA	19	33790840-33793470	0.0370405	0.00911944	5.59948e-06	0.168815	-0.0450289	0.0205121	0.0170988	0.177061	0.0128994	0.156968	-0.0247624	-0.00892212	0.0175074	0.812761	0.308818	0.199232	protein_coding	-	ENSG00000245848
CEP164	11	117279242-117279471	0.0162387	0.00039715	0.0608711	0.965044	0.0405282	0.0208202	0.0408504	0.314666	0.0238626	-0.0308959	0.218808	0.173164	0.796022	6.34526e-06	0	0.317573	protein_coding	+	ENSG00000110274
CERK	22	47080308-47083103	-0.0148367	-0.0410344	0.0925484	2.00815e-06	0.0648831	0.0689628	0.00177529	0.000571098	0.107048	-0.00779479	0.0344118	-0.0447518	0.16495	0.634347	0.190287	0.273646	protein_coding	-	ENSG00000100422
CFL2	14	35179593-35182183	-0.00469594	-0.00134653	0.530288	0.860735	-0.0128661	0.00211213	0.46008	0.904989	-0.0466486	0.0365428	0.153834	0.215265	0.488803	6.95612e-07	0.479158	0.367561	protein_coding	-	ENSG00000165410
CFLAR	2	201994052-201994869	0.0406925	0.00449439	1.42431e-06	0.491432	-0.00759137	0.0203616	0.694835	0.172799	-0.000729841	0.0137173	0.131487	0.0103962	0.971558	0.00508767	1.1014e-11	0.593879	protein_coding	+	ENSG00000003402
CFLAR	2	201997595-201997857	0.03963	0.000424864	6.02206e-06	0.95506	0.0118348	-0.00522126	0.552494	0.761599	-0.00278123	0.013452	0.105403	0.00352801	0.973143	0.0807335	0	0.380261	protein_coding	+	ENSG00000003402
CFLAR	2	202028558-202029033	0.0371248	0.00318889	4.52692e-06	0.656975	0.0020625	-0.0169831	0.910713	0.304726	0.0169878	0.0641549	0.0989727	-0.00956167	0.460513	0.0925211	8.65517e-15	0.231863	protein_coding	+	ENSG00000003402
CHST2	3	142839486-142841800	-0.0510111	0.00101638	1.59946e-09	0.91809	0.0653232	0.0126458	0.000770913	0.5778	0.0343114	0.0386621	0.0912315	0.160278	0.621938	0.01441	0.384934	0.432574	protein_coding	+	ENSG00000175040
CIAO1	2	96933028-96933207	0.000255053	-0.00293201	0.977242	0.732848	-0.00216673	0.0116711	0.916351	0.552423	-0.0172763	-0.0227217	0.29236	0.00711066	0.884712	4.65122e-07	1.28898e-07	0.244213	protein_coding	+	ENSG00000144021
CLASP1	2	122095354-122098523	0.0436107	-0.000166911	5.85305e-07	0.984019	-0.0778898	-0.0238381	0.000123229	0.215846	0.0609023	-0.0042757	0.0866296	0.155548	0.532396	0.00455392	0.169072	0.0278721	protein_coding	-	ENSG00000074054
CLK4	5	178029665-178032383	-0.0375496	-0.0240679	7.52213e-06	0.00323408	0.0549577	-0.0175897	0.00443457	0.348943	0.0465073	0.0274832	0.0538791	0.0800572	0.587666	0.18328	0.20366	0	protein_coding	-	ENSG00000113240
CLTC	17	57733215-57733388	0.0118795	0.00317851	0.150917	0.60464	0.0138309	0.021044	0.470144	0.132991	-0.0306352	-0.00971705	-0.0162897	-0.204174	0.823876	4.30167e-06	0.242414	3.26729e-12	protein_coding	+	ENSG00000141367
CLTC	17	57742148-57742270	0.00934349	0.000978432	0.243052	0.873026	-0.00117189	0.019562	0.949702	0.161575	-0.0583016	0.00741387	-0.00684986	-0.21261	0.511165	1.99415e-06	0.275833	0.150476	protein_coding	+	ENSG00000141367
CLTC	17	57743464-57743601	0.0120153	0.00705561	0.156148	0.258107	-0.00779801	0.016364	0.691753	0.249342	-0.041856	0.0252744	-0.0133741	-0.2121	0.677381	2.72562e-06	0.162315	0.0392565	protein_coding	+	ENSG00000141367
CNN1	19	11649579-11649805	NA	0.00915073	NA	0.31296	NA	0.0276885	NA	0.184668	NA	NA	0.155913	0.253549	NA	2.99792e-06	NA	0	protein_coding	+	ENSG00000130176
CNN1	19	11651891-11652012	-0.0261913	0.00739252	0.00352314	0.415039	-0.0181502	0.0229054	0.376489	0.273125	-0.0411451	-0.00746958	0.143362	0.249633	0.748656	7.41118e-06	0	4.57371e-14	protein_coding	+	ENSG00000130176
CNN1	19	11658612-11658722	-0.0276111	0.0090859	0.00245031	0.318219	-0.00508143	0.0211376	0.807878	0.31293	-0.0136492	-0.0407235	0.123791	0.275078	0.772543	3.28622e-06	0.0231638	2.20128e-11	protein_coding	+	ENSG00000130176
CNN1	19	11660138-11660284	-0.0288584	0.00682038	0.00184193	0.43692	0.00201626	0.0209617	0.924131	0.300366	-0.0609679	-0.0430975	0.129053	0.296356	0.42681	2.26394e-07	0.0721981	8.11854e-18	protein_coding	+	ENSG00000130176
CNN1	19	11660365-11661138	-0.0195189	0.0068135	0.0356836	0.458895	0.0243533	0.0223673	0.253829	0.292589	-0.0740975	0.00135492	0.0861417	0.309244	0.435516	1.58648e-06	0.22315	0.00295563	protein_coding	+	ENSG00000130176
CNR1	6	88849583-88855084	0.0363108	0.00356244	3.1992e-05	0.580603	-0.0830908	-0.0705808	5.37991e-05	2.58378e-06	0.0284297	-0.0560533	0.041071	-0.00887566	0.579693	0.588549	0.268471	0.181634	protein_coding	-	ENSG00000118432
COPA	1	160262274-160262410	0.00892387	0.00987663	0.304531	0.272263	-0.0450986	0.00374002	0.0252944	0.855404	-0.0376035	-0.05424	0.278411	0.0941741	0.50387	1.24404e-06	0.224867	1.65616e-19	protein_coding	-	ENSG00000122218
COX7A2P2	4	97823952-97824269	-0.008449	0.00407221	0.27577	0.60683	-0.0123182	0.0304692	0.488939	0.0930146	-0.217213	0.123222	-0.04614	0.0933665	5.97944e-06	0.157983	6.20254e-11	0.0437023	pseudogene	+	ENSG00000236764
CPEB3	10	93808399-93812196	-0.0421573	-0.00903293	1.41006e-07	0.175807	0.0819456	0.0243518	9.4069e-06	0.111342	0.0919758	-0.102267	0.0763251	0.00450803	0.0352634	0.181638	0	0.337935	protein_coding	-	ENSG00000107864
CPSF2	14	92627996-92630755	-0.0371036	-0.0196035	1.84788e-06	0.0100777	0.0464097	0.0139996	0.00936081	0.423669	0.00245544	0.0273685	0.0633271	0.034498	0.868723	0.308438	0.504423	0.279025	protein_coding	+	ENSG00000165934
CPT1A	11	68522355-68525198	-0.0218883	0.0038711	0.00661683	0.678763	0.0464961	0.0847709	0.0136158	0.000112376	0.108127	-0.0705765	0.200539	0.261242	0.0521614	6.19315e-07	0.283797	0.238862	protein_coding	-	ENSG00000110090
CRELD1	3	9976519-9976770	0.0140018	0.00775568	0.109118	0.390472	-0.0447483	-0.0304134	0.0275694	0.141586	0.0493446	0.00906724	0.250928	0.11739	0.65474	6.45988e-06	0.171589	0.00851162	protein_coding	+	ENSG00000163703
CREM	10	35500182-35501886	-0.0477516	-0.00435486	6.45262e-08	0.597265	0.0436632	0.0120889	0.0298324	0.522356	-0.0240586	-0.0567247	0.047534	0.106572	0.562263	0.0901621	0.0226501	0.583777	protein_coding	+	ENSG00000095794
CRHBP	5	76248538-76249040	0.0536794	NA	4.75677e-09	NA	-0.0749415	NA	0.000440459	NA	0.120295	0.0739392	NA	NA	0.0477117	NA	0.245342	NA	protein_coding	+	ENSG00000145708
CRHBP	5	76249242-76249519	0.0453786	NA	4.70859e-07	NA	-0.0715615	NA	0.000599152	NA	0.141792	0.0830007	NA	NA	0.0136497	NA	0.438919	NA	protein_coding	+	ENSG00000145708
CRHBP	5	76249854-76250011	0.0497685	NA	6.41782e-08	NA	-0.0788504	NA	0.000237749	NA	0.113472	0.0511644	NA	NA	0.0953317	NA	0.347145	NA	protein_coding	+	ENSG00000145708
CRHBP	5	76251478-76251688	0.0516339	NA	6.69196e-09	NA	-0.0881116	NA	2.0783e-05	NA	0.0840125	0.0498761	NA	NA	0.207781	NA	0.435982	NA	protein_coding	+	ENSG00000145708
CRHBP	5	76254522-76254847	0.0535582	NA	3.42697e-09	NA	-0.0744224	NA	0.000401089	NA	0.116346	0.0419623	NA	NA	0.0862998	NA	0.839256	NA	protein_coding	+	ENSG00000145708
CRHBP	5	76259060-76259285	0.0561352	NA	9.37167e-10	NA	-0.0717893	NA	0.000800376	NA	0.0869224	0.0502284	NA	NA	0.217291	NA	0.755538	NA	protein_coding	+	ENSG00000145708
CRHBP	5	76264553-76265299	0.0574339	0.0132056	3.68106e-10	0.181724	-0.0763402	0.0135366	0.00036396	0.557047	0.0951601	0.100524	-0.0479558	0.12329	0.0605024	0.163657	0.593828	0.143845	protein_coding	+	ENSG00000145708
CRIP2	14	105942196-105943079	0.0232932	0.00524448	0.00492693	0.530259	-0.000730086	-0.0705459	0.969702	0.000260267	0.243851	0.111944	0.114336	0.199317	2.9993e-06	0.00013243	0.084729	1.60585e-10	protein_coding	+	ENSG00000182809
CRIP2	14	105943101-105943938	0.0243604	0.00523587	0.00367131	0.528472	-0.0217121	-0.067666	0.25814	0.000429328	0.183886	0.0924701	0.086874	0.270875	0.000406666	2.00509e-06	0.131303	1.03865e-19	protein_coding	+	ENSG00000182809
CRY2	11	45868957-45869256	0.0563643	0.0327635	2.54468e-11	0.000117075	-0.0507949	-0.0278206	0.00781116	0.14807	-0.0194318	0.00451877	0.0470824	-0.0280995	0.929802	0.611437	9.29663e-14	0.103072	protein_coding	+	ENSG00000121671
CRY2	11	45877533-45877867	0.0581405	0.0329136	2.80345e-11	4.34466e-05	-0.0735839	-0.0344657	0.000219534	0.0588317	-0.00885576	-0.0869649	0.104706	-0.0682859	0.322451	0.0596813	9.93711e-11	0	protein_coding	+	ENSG00000121671
CRY2	11	45880282-45880424	0.0682825	0.0300764	7.77156e-15	0.000688041	-0.067274	-0.0560403	0.000679128	0.00556807	-0.00754318	-0.0508408	0.115722	-0.0762554	0.671084	0.0573103	0.101048	0.22339	protein_coding	+	ENSG00000121671
CRY2	11	45882399-45882583	0.0623976	0.0351488	9.00613e-13	2.72111e-05	-0.0663003	-0.0396609	0.000801958	0.0368787	-0.00919972	-0.0354965	0.103418	-0.0434843	0.815022	0.113433	0	4.28819e-17	protein_coding	+	ENSG00000121671
CRY2	11	45882713-45883699	0.0517072	0.016124	4.84778e-09	0.0606398	-0.0869365	-0.0870039	2.24061e-05	1.29667e-05	-0.0369484	0.0152585	0.169243	0.0854212	0.780998	0.0018115	1.92829e-08	0.48762	protein_coding	+	ENSG00000121671
CRY2	11	45888979-45889491	0.0621409	0.0323239	1.21103e-12	0.000205947	-0.0775999	-0.0526525	9.69826e-05	0.00802676	-0.00244227	-0.0832906	0.0831273	-0.0177827	0.365213	0.304608	2.54676e-09	0	protein_coding	+	ENSG00000121671
CRY2	11	45891057-45891368	0.0669698	0.0396087	4.66294e-14	4.74527e-06	-0.0937377	-0.0652637	3.85073e-06	0.000878082	0.00891984	-0.00971844	0.0378524	0.00116412	0.974684	0.775483	0	7.80959e-11	protein_coding	+	ENSG00000121671
CRY2	11	45891604-45891755	0.0707324	0.0345955	2.22045e-16	7.62722e-05	-0.0842488	-0.0891935	1.37607e-05	8.86565e-06	0.0302266	0.00844181	0.0633614	-0.0222455	0.834157	0.484368	0.0131742	0	protein_coding	+	ENSG00000121671
CRY2	11	45891881-45892083	0.0770012	0.030558	2.2e-16	0.000965521	-0.0815023	-0.0846847	3.27523e-05	7.71047e-05	-0.0117173	-0.0114015	0.034046	-0.0129884	0.954805	0.832319	0.117966	0	protein_coding	+	ENSG00000121671
CRY2	11	45892164-45892485	0.0640054	0.0299513	4.80505e-13	0.00119857	-0.103042	-0.0866967	3.27431e-07	4.8455e-05	-0.0749605	-0.021812	0.0999	0.0160323	0.343501	0.21157	0.0611726	0.00681874	protein_coding	+	ENSG00000121671
CRY2	11	45893643-45893784	0.071566	0.0295309	2.2e-16	0.00092245	-0.0740057	-0.0698317	0.000100187	0.000660666	-0.0557205	-0.018525	0.112714	-0.0542208	0.520325	0.0989644	7.61484e-11	2.99252e-09	protein_coding	+	ENSG00000121671
CRY2	11	45902465-45904798	0.0781134	0.0489979	2.2e-16	1.26022e-10	-0.118704	-0.122075	1.949e-09	4.30278e-12	-0.056553	0.0588857	-0.0460401	0.0383286	0.347649	0.482712	9.96051e-11	3.41012e-12	protein_coding	+	ENSG00000121671
CRYAB	11	111779877-111779991	0.0295342	NA	0.00119989	NA	-0.0159397	NA	0.446091	NA	0.0994133	-0.289669	NA	NA	6.27927e-06	NA	0.498724	NA	protein_coding	-	ENSG00000109846
CSRNP2	12	51454990-51458452	-0.0177166	-0.0208298	0.0466411	0.0135165	0.0520189	-0.0282001	0.0138516	0.147758	0.251801	-0.00423758	0.229702	0.121759	0.000108158	7.3828e-06	0.0994891	0.0267543	protein_coding	-	ENSG00000110925
CSRP1	1	201454411-201462029	-0.0081213	0.00656465	0.386136	0.455469	-0.014758	0.0181926	0.504235	0.367363	0.0965594	-0.0275679	0.197196	0.245573	0.261581	1.98177e-07	0.304524	6.21507e-09	protein_coding	-	ENSG00000159176
CSRP1	1	201464727-201465432	-0.00817364	0.00737785	0.334747	0.405951	-0.00472535	0.0212499	0.80993	0.29764	0.0873695	-0.0117101	0.166466	0.219712	0.260293	9.86676e-06	0.0771752	1.58948e-12	protein_coding	-	ENSG00000159176
CSTA	3	122060286-122060819	-0.0141042	-0.0148303	0.0851642	0.0497082	0.00151915	-0.00788709	0.937148	0.650669	-0.170011	-0.0162264	-0.210349	-0.112599	0.00533146	4.08286e-06	0.237397	0.267856	protein_coding	+	ENSG00000121552
CTB-13H5.1	5	149473860-149474619	-0.00834428	0.00184255	0.299038	0.818919	-0.02315	-0.00171293	0.212009	0.926253	0.160611	0.217725	-0.079159	0.0129536	1.99925e-06	0.293355	0.271758	0.366222	pseudogene	+	ENSG00000214485
CTBP1	4	1207266-1207542	0.000716664	0.00187364	0.920109	0.811635	-0.0130117	-0.0175825	0.42813	0.328368	0.009518	0.0422732	0.102764	0.228159	0.662089	7.03295e-06	0.109966	0	protein_coding	-	ENSG00000159692
CTPS1	1	41477330-41478235	-0.0386118	0.00536345	6.7779e-06	0.550867	0.0219211	-0.0108513	0.264389	0.599867	0.0448373	0.00689158	0.0641441	0.110942	0.693809	0.087443	2.6223e-10	2.46538e-09	protein_coding	+	ENSG00000171793
CYP4B1	1	47276745-47276856	0.0420049	NA	2.03035e-06	NA	-0.0258568	NA	0.200045	NA	0.0789569	-0.0472405	NA	NA	0.269686	NA	0.357234	NA	protein_coding	+	ENSG00000142973
CYP4Z1	1	47583438-47583991	-0.0504651	NA	6.70561e-09	NA	0.0772352	NA	0.000153151	NA	0.0171298	0.0455207	NA	NA	0.709924	NA	0.425168	NA	protein_coding	+	ENSG00000186160
CYR61	1	86046883-86047261	-0.00375681	-0.00957078	0.664073	0.298536	0.00809574	-0.00339584	0.682444	0.872176	0.242982	-0.189628	0.047006	0.017364	5.91053e-07	0.682398	0.0512578	0.23803	protein_coding	+	ENSG00000142871
CYR61	1	86047611-86047967	-0.0116167	-0.00843402	0.209251	0.360499	-0.000980855	-0.0125501	0.96323	0.551097	0.234777	-0.189243	0.041908	0.0260183	7.9729e-06	0.68215	0.116005	0.353807	protein_coding	+	ENSG00000142871
CYR61	1	86048099-86048307	-0.00985763	-0.013787	0.280278	0.148905	0.0126068	-0.0312142	0.547789	0.154386	0.231883	-0.20424	0.0264606	0.0242129	2.94356e-06	0.834675	3.4347e-09	0.0688503	protein_coding	+	ENSG00000142871
CYS1	2	10196907-10199085	-0.0292358	-0.00732767	0.00143994	0.418478	-0.000925587	0.000417984	0.965733	0.983975	-0.00564866	-0.106055	-0.0256028	-0.422103	0.241234	1.18031e-10	0.444472	0.341252	protein_coding	-	ENSG00000205795
DBP	19	49133820-49134309	0.0862416	0.053149	2.2e-16	2.52602e-11	-0.112979	-0.0686731	7.24145e-10	0.00013833	-0.0410283	0.078652	-0.148985	-0.00307346	0.247513	0.00955428	0.0702725	0.377316	protein_coding	-	ENSG00000105516
DBP	19	49136701-49136912	0.0837231	0.0508654	2.2e-16	6.08716e-10	-0.12436	-0.0780932	2.38622e-11	2.8893e-05	-0.043213	0.0780606	-0.163582	-0.0124595	0.250234	0.00532322	0.252185	0.10985	protein_coding	-	ENSG00000105516
DBP	19	49138837-49139247	0.0739633	0.040596	2.2e-16	6.16057e-08	-0.11371	-0.0455154	1.09258e-10	0.00746751	0.0191135	0.105536	-0.0777489	-0.0241348	0.10221	0.205236	0.335165	0.237125	protein_coding	-	ENSG00000105516
DBP	19	49140113-49140639	0.0910565	0.0555295	2.2e-16	6.33005e-12	-0.134297	-0.0709709	5.55556e-13	0.000100301	0.00483946	0.0927334	-0.127477	-0.0562055	0.214801	0.0172219	0.409368	0.259894	protein_coding	-	ENSG00000105516
DDIT4	10	74033678-74034393	0.0597124	0.0067236	5.23797e-11	0.467726	-0.0890054	-0.0297633	2.00844e-05	0.163635	-0.0323698	-0.0463419	0.0975824	0.034358	0.625751	0.200511	0.0669941	0.322526	protein_coding	+	ENSG00000168209
DDIT4	10	74034453-74035794	0.0581162	0.0138133	1.82445e-10	0.13191	-0.0913429	-0.0296463	1.55523e-05	0.161452	-0.067407	-0.0370363	0.0213099	-0.00695833	0.392261	0.931291	0.133286	0.336949	protein_coding	+	ENSG00000168209
DDR1	6	30856166-30857207	0.0407565	0.0167437	2.39923e-06	0.0567658	-0.00991622	0.0233517	0.616086	0.243565	0.0810919	0.0650353	0.19373	0.0831079	0.158512	0.000495824	0.385289	0.14674	protein_coding	+	ENSG00000204580
DDR1	6	30858185-30859256	0.0474002	0.0186995	1.08661e-07	0.0343761	-0.0227497	0.00596918	0.265115	0.76662	0.000303214	0.0727022	0.212856	0.104029	0.483694	8.45749e-05	0.265114	0.14012	protein_coding	+	ENSG00000204580
DDR1	6	30859779-30859965	0.040081	0.0167361	6.06192e-06	0.0628767	-0.0321559	0.0128773	0.113406	0.530139	0.112136	0.164591	0.207328	0.0881766	0.00202856	0.00026437	0.129595	0.250735	protein_coding	+	ENSG00000204580
DDR1	6	30860397-30860940	0.0492428	0.0188511	1.44995e-08	0.0340838	-0.0271004	-0.0093222	0.168558	0.64791	-0.0311717	0.0968628	0.0941889	0.11959	0.217314	0.0273442	0	0.221346	protein_coding	+	ENSG00000204580
DDR1	6	30862283-30862448	0.0396658	0.0170137	5.07564e-06	0.0383791	-0.0139851	0.0050184	0.481934	0.789355	0.0825185	0.119801	0.173818	0.107134	0.0333207	0.000359674	0.235301	0.131576	protein_coding	+	ENSG00000204580
DDR1	6	30864398-30864642	0.0431562	0.0187383	9.74508e-07	0.0303777	0.00185951	0.0123083	0.926543	0.533339	0.0809394	0.136712	0.151487	0.155934	0.0182486	0.000377975	0.245512	0.203938	protein_coding	+	ENSG00000204580
DDR1	6	30864791-30864918	0.0462644	0.0213181	8.12896e-08	0.0201032	-0.0237897	0.0179115	0.228646	0.396294	0.0933797	0.0692156	0.16796	0.12774	0.0972317	0.00123664	0.220353	0.324829	protein_coding	+	ENSG00000204580
DDR1	6	30865138-30865374	0.0461116	0.0216827	2.55822e-07	0.0132815	-0.0161071	0.00860587	0.433283	0.668372	0.0492873	0.12494	0.131204	0.139121	0.0697373	0.00247359	0	0.225006	protein_coding	+	ENSG00000204580
DDR1	6	30865850-30866084	0.0413328	0.0202098	2.82464e-06	0.0214974	-0.0075752	0.0112111	0.708361	0.578015	0.0349659	0.123466	0.13765	0.16567	0.0858493	0.000680812	0.543609	0.320064	protein_coding	+	ENSG00000204580
DDR1	6	30866665-30867933	0.040479	0.0188966	3.81571e-06	0.0302528	-0.0222574	-0.00920777	0.270615	0.648081	0.0451922	0.141397	0.0758975	0.197811	0.0378481	0.00125769	0.422827	0.248548	protein_coding	+	ENSG00000204580
DDX19B	16	70367424-70369186	-0.00408727	-0.00265143	0.647641	0.770906	-0.00650367	-0.0256067	0.752802	0.220281	-0.0560736	0.00370134	-0.238119	-0.159898	0.607423	3.56965e-06	6.37608e-17	0.0775531	protein_coding	+	ENSG00000157349
DDX21	10	70742299-70744829	-0.0426672	-0.00381165	4.28704e-07	0.612008	0.0153158	-0.0247707	0.428283	0.152581	0.188384	-0.0550936	0.0701464	0.00143871	0.00134088	0.331852	0	0.0789238	protein_coding	+	ENSG00000165732
DEDD	1	161092775-161093011	-0.00674317	-0.0160449	0.454174	0.0606118	0.00917593	-0.0192966	0.658341	0.322728	0.0688702	-0.0165713	0.14553	0.276889	0.462031	1.41796e-07	4.36701e-11	0.239543	protein_coding	-	ENSG00000158796
DENND1A	9	126141933-126144904	0.0334966	0.0592755	2.92692e-05	8.98903e-12	-0.0396922	-0.0539974	0.0322639	0.00597807	-0.0356646	-0.0189666	-0.0261108	0.0730937	0.722106	0.414433	0.0163291	0.00019717	protein_coding	-	ENSG00000119522
DENND1A	9	126145934-126146192	0.0168748	0.0397413	0.0577871	3.63379e-06	-0.041508	-0.00966199	0.0432161	0.617764	-0.0910681	-0.111045	0.0669374	0.0119285	0.0411423	0.432301	0.339022	0.0689735	protein_coding	-	ENSG00000119522
DENND1A	9	126165681-126165852	0.0143078	0.0421438	0.11825	4.36037e-06	-0.0431649	-0.00644861	0.0397881	0.754821	-0.0620895	-0.114149	0.0183943	0.00652683	0.0885045	0.939932	0.116336	1.59908e-14	protein_coding	-	ENSG00000119522
DENND1A	9	126345448-126345549	0.00420013	0.0417348	0.638566	4.14198e-06	-0.0458388	-0.0124956	0.0258717	0.540842	0.150096	-0.0802249	-0.0243189	0.000659518	0.0133597	0.909636	0.27921	3.77758e-10	protein_coding	-	ENSG00000119522
DENND4A	15	65956898-65957060	-0.0391417	0.00115061	7.54642e-06	0.891318	-0.0038425	0.00151541	0.846225	0.937056	-0.0252202	-0.0818284	0.0512846	-0.0171449	0.322076	0.60345	0.159595	0	protein_coding	-	ENSG00000174485
DERL1	8	124025458-124031545	-0.0291218	-0.00623939	0.000878771	0.418787	0.00791823	0.0377511	0.701696	0.0333394	0.0477585	0.0395026	0.211091	0.117655	0.55252	4.61793e-06	0.689877	0.196244	protein_coding	-	ENSG00000136986
DGKE	17	54939973-54946034	0.0452852	-1.88851e-05	3.19761e-07	0.997996	-0.0325328	-0.00544905	0.112675	0.754002	0.0785793	0.0311025	0.0850106	0.0515134	0.308157	0.106184	0.27682	0.420363	protein_coding	+	ENSG00000153933
DGKZ	11	46389202-46391559	-0.00536138	-0.0173052	0.531584	0.0524947	0.0345028	0.00795217	0.0842137	0.695833	0.147208	0.0651087	0.201914	0.210116	0.0126066	1.79928e-06	0	0.0533651	protein_coding	+	ENSG00000149091
DHRS3	1	12639796-12640694	0.0451628	-0.0057983	6.02006e-08	0.530576	-0.071941	0.0114902	0.000257598	0.58973	-0.0382814	0.107507	0.0573224	0.105267	0.143216	0.131884	0.479158	5.0743e-09	protein_coding	-	ENSG00000162496
DHRS3	1	12677159-12677737	0.0480023	0.000999355	2.3279e-09	0.90891	-0.0416168	0.0700927	0.0263126	0.000489606	0.0388642	0.13311	0.106296	0.0989538	0.0363201	0.0290011	0.450459	0.334968	protein_coding	-	ENSG00000162496
DNAJB1	19	14627278-14627858	0.0438516	0.00295004	2.35949e-06	0.744543	-0.0441266	0.0545781	0.0402209	0.00908663	0.0863405	-0.0548504	-0.00162448	-0.0176955	0.24157	0.958335	0.39053	0.16805	protein_coding	-	ENSG00000132002
DNAJC21	5	34953631-34954296	-0.0194549	-0.0365433	0.0248546	5.92736e-06	0.0575562	-0.0224266	0.00380149	0.217182	0.0218881	-0.0966565	-0.0055929	0.0243024	0.240906	0.899069	0	2.03332e-13	protein_coding	+	ENSG00000168724
DNM3	1	172376912-172381857	0.0538353	0.0136818	2.17312e-10	0.0471779	-0.085076	-0.0575783	1.52673e-05	0.000329087	-0.100512	-0.040255	-0.0267576	0.0125784	0.115207	0.807556	4.10961e-09	0.338669	protein_coding	+	ENSG00000197959
DOCK9	13	99445741-99447005	0.035794	0.00191251	1.1852e-05	0.794275	-0.111203	-0.0555257	1.32598e-08	0.00106264	-0.0459603	-0.121635	0.0400973	0.151355	0.062546	0.00549055	0.261209	0.0153961	protein_coding	-	ENSG00000088387
DOCK9	13	99449364-99449507	0.0324539	-0.000671975	0.00012226	0.935013	-0.107619	-0.0442912	6.25521e-08	0.019507	-0.0117612	-0.186668	0.104983	0.0496183	0.00505219	0.071947	0.298685	0.553406	protein_coding	-	ENSG00000088387
DOCK9	13	99449643-99449743	0.0351903	-0.00275781	5.51106e-05	0.736715	-0.100823	-0.0361306	8.07817e-07	0.05521	-0.0462041	-0.113485	0.111218	0.115667	0.102417	0.00772165	0	0.380973	protein_coding	-	ENSG00000088387
DOCK9	13	99452542-99452732	0.0326419	0.00551787	0.000242585	0.48432	-0.0925612	-0.00995492	8.89472e-06	0.582102	-0.0265784	-0.111505	0.0990549	0.0637446	0.158999	0.0533854	1.92021e-14	0.348399	protein_coding	-	ENSG00000088387
DOCK9	13	99457253-99457463	0.0434105	0.00771096	5.89829e-07	0.266096	-0.0908241	-0.0201332	7.85649e-06	0.204015	-0.0136126	-0.164071	0.0359759	0.0183854	0.0207308	0.636084	0.192491	0.13818	protein_coding	-	ENSG00000088387
DOCK9	13	99459915-99460061	0.0329352	0.01022	0.00012781	0.138132	-0.0921684	-0.0302918	4.63022e-06	0.0548027	-0.00689306	-0.114562	-0.00153316	-0.00280922	0.143196	0.997324	0.185288	0.112332	protein_coding	-	ENSG00000088387
DPP4	2	162891674-162891834	-0.00611462	0.00299166	0.490654	0.721397	0.0245023	-0.0048579	0.230029	0.800354	-0.0833059	-0.0795071	0.0513664	-0.277298	0.118324	7.77865e-06	0.00265461	1.35471e-18	protein_coding	-	ENSG00000197635
DTX2	7	76109738-76110095	-0.00103155	-0.0111991	0.907396	0.166093	0.0223244	0.107275	0.277467	1.19032e-08	0.116775	0.0088284	0.0587535	0.0363645	0.109303	0.385762	1.81334e-16	5.44083e-11	protein_coding	+	ENSG00000091073
DTX2	7	76111825-76112464	0.00444618	-0.0236599	0.565162	0.00227833	0.031027	0.0802168	0.0834042	8.62314e-06	0.125592	-0.0426361	-0.020682	0.0839835	0.0285181	0.265885	0.0856318	1.17612e-10	protein_coding	+	ENSG00000091073
DTX2	7	76134691-76135312	-0.00347616	-0.011791	0.646003	0.0997033	0.0362685	0.0772879	0.0409289	3.28453e-06	0.0137751	0.0499615	-0.00393421	0.108445	0.59962	0.0796561	0.14569	0	protein_coding	+	ENSG00000091073
DUSP3	17	41843490-41847182	-0.0213362	0.00020762	0.0140719	0.97875	0.0207409	0.0113963	0.307045	0.522417	0.0575791	-0.0785042	0.230454	0.192763	0.264654	1.20103e-08	0.530574	5.311e-10	protein_coding	-	ENSG00000108861
DUSP4	8	29190581-29194928	0.0410065	0.00428806	8.39023e-06	0.639265	-0.0518223	-0.00812875	0.0174017	0.699241	0.127925	0.135003	0.172693	0.0511082	0.00823558	0.00681496	0.321402	0.571448	protein_coding	-	ENSG00000120875
DUSP4	8	29195799-29196018	0.0426264	-0.000580195	3.02648e-06	0.948178	-0.0397426	-0.0189827	0.0632509	0.351613	0.116961	0.0820296	0.14658	0.00998537	0.0473712	0.029885	0.354539	3.23526e-15	protein_coding	-	ENSG00000120875
DUSP4	8	29197615-29197760	0.0473171	0.0165049	9.42527e-08	0.0639798	-0.0399571	-0.00137189	0.0495831	0.946053	0.145592	0.100697	0.142004	0.0112224	0.00582664	0.0370772	0.144838	0.407168	protein_coding	-	ENSG00000120875
DUSP4	8	29207363-29208185	0.0452822	0.0101399	2.85332e-07	0.238237	-0.0429077	0.0156632	0.0355855	0.425277	0.139399	0.12261	0.157612	-0.0149573	0.00446373	0.0139396	0.0185275	0.518116	protein_coding	-	ENSG00000120875
DUSP6	12	89744365-89744948	-0.0102451	-0.00836791	0.253363	0.33007	0.0397229	0.0365117	0.0569801	0.0649135	0.193372	0.0137374	0.219377	0.200013	0.00278443	4.27603e-07	5.75256e-15	6.08259e-12	protein_coding	-	ENSG00000139318
DYSF	2	71796950-71797064	0.0403702	NA	6.44916e-06	NA	-0.0529422	NA	0.00932685	NA	0.028369	-0.13723	NA	NA	0.0686351	NA	1.62177e-08	NA	protein_coding	+	ENSG00000135636
DYSF	2	71886008-71886163	0.0411355	0.0290686	9.54406e-06	0.00211939	-0.0440561	0.000371131	0.0393172	0.986347	0.000694532	-0.0110108	0.0465089	-0.00604255	0.984588	0.736298	0.0156768	0.28094	protein_coding	+	ENSG00000135636
EED	11	85974987-85977258	-0.03927	-0.0229208	9.90878e-06	0.00773265	0.0386261	-0.0117752	0.0578405	0.550465	0.0517299	-0.01095	0.12134	0.0498068	0.63575	0.0494675	4.9393e-12	0.212896	protein_coding	+	ENSG00000074266
EEF2K	16	22236975-22237296	0.039688	0.0119079	1.71529e-06	0.10409	-0.0261295	-0.00118387	0.170508	0.943425	0.0315618	-0.119768	0.0300887	-0.0843334	0.0935658	0.198549	3.43222e-11	0.158217	protein_coding	+	ENSG00000103319
EEF2K	16	22255951-22256051	0.0402383	0.0136057	2.02073e-06	0.0885764	0.010964	0.00137208	0.568772	0.93978	0.0464086	-0.122754	0.0158389	-0.0428354	0.0721253	0.701404	0.0509976	0.139277	protein_coding	+	ENSG00000103319
EEF2K	16	22269815-22270016	0.0414775	0.00847221	1.2876e-06	0.269455	-0.0110821	-0.00883888	0.572171	0.613602	0.0017927	-0.153527	-0.0113486	-0.117564	0.0326622	0.0694547	0.162798	0.342601	protein_coding	+	ENSG00000103319
EEF2K	16	22291519-22291697	0.0397625	0.0123942	2.87055e-06	0.13049	-0.0365732	-0.00326151	0.0612159	0.861783	0.0107868	-0.189211	-0.0217189	-0.0777613	0.00499099	0.324752	2.86448e-14	0.0423327	protein_coding	+	ENSG00000103319
EEF2K	16	22295208-22297954	0.0446444	0.00521274	1.08524e-07	0.577775	-0.0407793	-0.0353397	0.0368754	0.104538	0.013802	-0.158471	-0.0603761	-0.0632945	0.0228911	0.342304	0.134161	0.0630948	protein_coding	+	ENSG00000103319
EGR1	5	137802446-137805004	-0.00872377	-0.0281681	0.329024	0.00338395	0.0312843	0.0344205	0.128085	0.117168	0.233405	-0.17646	0.0585857	0.0948527	5.95903e-06	0.185657	0	0.030139	protein_coding	+	ENSG00000120738
EIF3K	19	39116668-39116742	-0.00729446	0.00549327	0.379749	0.500442	-0.0172248	0.0323587	0.367419	0.0837321	-0.25079	0.0840765	-0.118841	0.0673259	5.54526e-06	0.0385342	3.11746e-12	4.81843e-16	protein_coding	+	ENSG00000178982
ELMO2	20	44997530-44999164	-0.0142411	-0.0163863	0.0984084	0.0544159	0.0262207	0.00658422	0.183596	0.735016	0.0984148	-0.0165692	0.256596	0.138399	0.170165	4.72449e-07	5.70364e-10	0.404024	protein_coding	-	ENSG00000062598
ELMO2	20	45000218-45000330	-0.0103125	-0.00549922	0.266968	0.535363	0.0345015	0.0402063	0.109552	0.0475578	0.0526909	-0.0256759	0.225058	0.1868	0.625045	1.2509e-06	0.127822	2.06497e-18	protein_coding	-	ENSG00000062598
ELMOD3	2	85604467-85604597	0.0310132	-0.0173396	0.000399305	0.0508868	-0.0966099	0.0231596	2.78967e-06	0.256073	-0.0106117	-0.0786157	0.103964	0.125578	0.409544	0.015309	0.110468	5.66273e-13	protein_coding	+	ENSG00000115459
EMC7	15	34376218-34376687	-0.0173127	-0.035033	0.0424675	3.80636e-06	0.0112633	-0.0177733	0.566029	0.298881	-0.0648029	0.0916145	-0.164126	0.123223	0.151028	0.000198713	0.172187	0.485905	protein_coding	-	ENSG00000134153
EMP1	12	13366615-13369708	0.0289054	-0.00796956	0.00116635	0.384558	-0.0997627	-0.0162847	1.95223e-06	0.441021	-0.0270511	0.0148066	-0.00722078	-0.0119265	0.871234	0.972349	0.397482	0	protein_coding	+	ENSG00000134531
ENDOU	12	48105416-48105558	NA	-0.0399332	NA	2.99896e-06	NA	0.00812204	NA	0.673978	NA	NA	0.0521087	0.0558649	NA	0.347419	NA	4.58302e-13	protein_coding	-	ENSG00000111405
ETS1	11	128328656-128332471	0.038603	-0.000957655	5.38927e-06	0.880754	-0.0782103	-0.0123229	8.70582e-05	0.39833	0.203893	-0.0203418	0.055583	-0.0471153	0.000829022	0.229446	0.104851	0.466447	protein_coding	-	ENSG00000134954
EXOC6	10	94817980-94819250	-0.0422177	-0.0122251	3.07889e-07	0.107035	0.0508007	-0.0150424	0.00795122	0.38788	-0.00757497	-0.0276396	-0.0401819	0.107376	0.875725	0.0879146	0.257612	0.274259	protein_coding	+	ENSG00000138190
EZH1	17	40874813-40874933	0.037937	0.00105621	5.39124e-06	0.898298	-0.00296207	0.0219574	0.875591	0.243174	-0.0219414	-0.111861	0.135196	-0.0330476	0.114064	0.0294611	9.98403e-12	7.09678e-13	protein_coding	-	ENSG00000108799
F13A1	6	6224919-6225093	-0.0003259	0.00102146	0.972203	0.902462	-0.0100293	-0.00594466	0.646923	0.756885	-0.0671171	-0.158813	-0.0408721	-0.277031	0.0230364	5.49256e-06	5.20312e-14	0.433687	protein_coding	-	ENSG00000124491
FABP5	8	82195263-82195773	-0.0148596	-0.0406668	0.110862	3.11504e-06	0.0695567	0.00434565	0.0015924	0.827788	0.161722	-0.0882659	0.0685858	-0.0853269	0.0128972	0.186375	0.0565758	3.61512e-10	protein_coding	+	ENSG00000164687
FAH	15	80448293-80450512	-0.00880654	0.00778799	0.332998	0.401933	-0.0384643	0.0226739	0.0720331	0.284805	-0.00258637	-0.0605834	0.239098	0.190843	0.624717	9.26268e-07	0.331031	0.312752	protein_coding	+	ENSG00000103876
FAM118B	11	126126462-126126747	-0.0377343	-0.0205182	7.26668e-06	0.0235545	-0.015808	-0.00432091	0.410397	0.833736	-0.0200691	-0.02418	0.040703	0.148068	0.837825	0.0331251	0.254032	2.30577e-18	protein_coding	+	ENSG00000197798
FAM124B	2	225243415-225244925	-0.0492604	-0.0193353	3.93056e-08	0.0267321	0.102636	0.0198832	1.232e-06	0.320273	0.00778845	-0.151464	-0.0053527	-0.139292	0.049218	0.0579784	0.302041	2.88062e-12	protein_coding	-	ENSG00000124019
FAM124B	2	225265754-225266802	-0.0508627	-0.0171336	4.75439e-08	0.0304867	0.0553366	0.0505057	0.0106846	0.00537154	0.0102962	-0.0857184	-0.0207793	-0.000117652	0.400385	0.91397	0.0844885	0.282003	protein_coding	-	ENSG00000124019
FAM162A	3	122128586-122131181	-0.0100806	-0.0381258	0.240672	2.50447e-07	0.00777113	0.0270471	0.698265	0.107387	-0.133337	0.0627257	-0.0989404	0.092064	0.030784	0.0233384	0.378823	0.334568	protein_coding	+	ENSG00000114023
FAM162B	6	117086568-117086886	0.0434461	-0.00208633	6.0982e-08	0.814342	-0.0270669	-0.0152347	0.13581	0.455886	0.0860989	0.0580569	-0.0083859	-0.0431042	0.107298	0.757544	0	0.568031	protein_coding	-	ENSG00000183807
FAM211B	22	24988184-24989046	-0.0118896	-0.00132951	0.192888	0.88458	0.0126594	-0.0101903	0.548711	0.62721	0.157536	0.0778101	0.164056	0.29056	0.00881006	1.60919e-07	0.0265328	0	protein_coding	-	ENSG00000178026
FAM214A	15	52892324-52892432	0.0374379	-0.0203228	5.29278e-06	0.00840054	-0.0629405	-0.0103009	0.000853333	0.55919	0.0311895	-0.0471827	0.0430998	0.0306931	0.587874	0.537151	0.279638	0.16002	protein_coding	-	ENSG00000047346
FAM46B	1	27331511-27333448	0.0450836	0.0382208	1.2087e-07	8.50603e-07	-0.142093	-0.0793706	2.02038e-12	8.69528e-06	-0.0938824	0.0534696	-0.186955	-0.0729329	0.149881	0.00015773	0.191171	0.0550736	protein_coding	-	ENSG00000158246
FAM49A	2	16730727-16734267	-0.0461946	-0.0204874	1.99106e-07	0.00973197	0.0584152	0.0027011	0.00489301	0.881342	-0.0535966	-0.076617	0.0590379	0.0211778	0.270769	0.433655	0.668609	0.0132895	protein_coding	-	ENSG00000197872
FAM76A	1	28087006-28088475	0.0358512	0.0152024	3.66304e-05	0.0580774	-0.128691	-0.0780452	4.14036e-10	2.85439e-05	0.00439627	-0.0345937	0.0842666	-0.00175853	0.839951	0.248127	0.424285	0	protein_coding	+	ENSG00000009780
FAM83G	17	18872102-18875061	0.039658	-0.00236759	7.08656e-06	0.768105	-0.0208461	0.0134061	0.30756	0.464841	-0.0587853	0.0210638	-0.0246325	-0.0336594	0.538615	0.709365	0.471888	0.0264199	protein_coding	-	ENSG00000188522
FAM83G	17	18877220-18882986	0.0513555	-0.000454187	2.67559e-09	0.958301	0.0126086	0.011191	0.519888	0.573529	0.029134	-0.0151169	0.0884508	-0.0407661	0.835151	0.22709	0.497488	0	protein_coding	-	ENSG00000188522
FANCC	9	97861336-97864132	0.0408732	0.0189051	8.88872e-06	0.0398384	-0.0345755	-0.050537	0.101369	0.0167889	-0.0429175	0.0609887	0.0104256	0.187518	0.479692	0.00936437	0.328692	0.183827	protein_coding	-	ENSG00000158169
FARS2	6	5368783-5369415	0.0143492	0.051999	0.116692	3.44267e-08	-0.0470276	-0.0510897	0.0268792	0.0170585	0.0756689	-0.0289977	-0.015199	-0.0363157	0.386948	0.80926	0.17591	0.333947	protein_coding	+	ENSG00000145982
FAXDC2	5	154202868-154204268	0.0221987	-0.00303402	0.0120748	0.73091	-0.011197	0.0437202	0.583035	0.0303495	0.0198527	-0.184466	0.277313	0.0708258	0.00876786	1.12424e-06	0.396277	0.463013	protein_coding	-	ENSG00000170271
FBN1	15	48725063-48725185	-0.00282246	0.000122771	0.757896	0.987357	-0.00836365	-0.0224229	0.697164	0.207606	-0.0288067	-0.121572	0.0312209	-0.269253	0.133557	2.53306e-06	0.0246025	0.249913	protein_coding	-	ENSG00000166147
FBN1	15	48726791-48726910	-0.00267105	0.000891786	0.772816	0.902763	-0.00414998	-0.00556306	0.849063	0.738829	-0.0338874	-0.0952148	0.0734307	-0.230834	0.272072	9.3382e-06	0.0258228	0.556808	protein_coding	-	ENSG00000166147
FBXL22	15	63893495-63894627	-0.0168042	0.00252074	0.0645462	0.781804	-0.0149218	-0.00940194	0.471636	0.652469	-0.00387547	-0.0269061	0.122919	0.271491	0.900679	3.66329e-06	3.87409e-16	0.20032	protein_coding	+	ENSG00000197361
FBXL7	5	15936559-15939900	-0.0436037	0.00480909	5.98853e-07	0.601131	0.0320073	0.0030688	0.112183	0.88537	0.00351036	-0.150878	0.071949	-0.0615236	0.0398224	0.318833	0.148316	0.071819	protein_coding	+	ENSG00000183580
FBXW4	10	103384502-103386656	-0.00548489	-0.00657177	0.558431	0.458761	0.0180983	0.0176892	0.406231	0.38194	0.0357433	-0.0311339	0.190105	0.241671	0.751619	4.24736e-07	1.13522e-11	0.0375911	protein_coding	-	ENSG00000107829
FCGR2B	1	161641182-161643019	0.0101456	-0.00463099	0.265389	0.623553	0.0257663	-0.0145092	0.221127	0.50358	-0.0640849	-0.287146	-0.00215265	-0.144142	8.50553e-06	0.0783273	0.0675497	0	protein_coding	+	ENSG00000072694
FGF12	3	191859684-191861916	0.0527467	0.0154667	1.39577e-09	0.0599519	-0.0904573	-0.0183936	7.81937e-06	0.326739	-0.0134382	-0.0541773	0.0253853	0.0337666	0.627876	0.713453	0.262602	0.392184	protein_coding	-	ENSG00000114279
FGF12	3	191888247-191888445	0.0407855	NA	3.22893e-06	NA	-0.055026	NA	0.00610582	NA	0.00016953	0.00840486	NA	NA	0.989807	NA	0.027063	NA	protein_coding	-	ENSG00000114279
FGGY	1	60132955-60133075	0.0116512	0.0102223	0.196664	0.19497	0.0274696	-0.083242	0.185198	5.14816e-06	-0.0974832	-0.142032	-0.0996079	0.0340545	0.011281	0.120274	0.425783	3.45953e-08	protein_coding	+	ENSG00000172456
FHL2	2	106015299-106016124	0.00188914	0.00406425	0.832471	0.640087	-0.0171429	0.0561442	0.402766	0.00481379	-0.072703	0.073165	0.255757	0.104408	0.222453	2.27732e-06	0	0	protein_coding	-	ENSG00000115641
FJX1	11	35639735-35642419	-0.0466193	-0.0120306	1.37592e-08	0.202415	0.0804857	-0.0689272	1.95814e-05	0.00166417	0.0724936	-9.22038e-05	-0.0420537	0.0318399	0.356405	0.70781	0	3.34393e-12	protein_coding	+	ENSG00000179431
FKBP5	6	35541362-35543719	0.0309954	0.0558835	0.000403954	4.17314e-10	-0.118145	-0.153766	2.05598e-08	4.91163e-13	-0.0111333	-0.00994539	-0.0678733	0.038833	0.965699	0.425042	0.0726191	6.75284e-09	protein_coding	-	ENSG00000096060
FKBP5	6	35544771-35545010	0.0331289	0.0444035	8.30051e-05	2.84277e-07	-0.0913168	-0.116531	3.96866e-06	9.06637e-09	0.0289158	-0.0509327	-0.030924	0.0124246	0.598372	0.839292	5.25831e-11	1.99656e-12	protein_coding	-	ENSG00000096060
FKBP5	6	35547813-35547998	0.0354162	0.0453961	2.32869e-05	9.07569e-08	-0.0929957	-0.0978706	2.3571e-06	6.53229e-07	0.00061968	-0.060614	-0.0151234	-0.0331177	0.571548	0.801419	0	2.21717e-08	protein_coding	-	ENSG00000096060
FKBP5	6	35548334-35554894	0.0359366	0.0277754	1.91356e-05	5.24823e-05	-0.0761888	-0.0732559	0.000122692	3.56893e-06	0.0060873	-0.0268484	-0.0280855	-0.027052	0.898056	0.657915	0	0.764073	protein_coding	-	ENSG00000096060
FKBP5	6	35558907-35558997	0.0404493	0.0480372	1.39185e-06	9.5083e-09	-0.066119	-0.078077	0.000586185	4.08517e-05	0.00233369	-0.0836531	-0.016132	-0.0674461	0.333612	0.437805	0.0649999	0.103711	protein_coding	-	ENSG00000096060
FKBP5	6	35565025-35565181	0.0314403	0.0472589	0.00013225	1.01169e-08	-0.0854026	-0.0852892	8.01186e-06	6.17213e-06	0.0241646	-0.0744198	0.0367242	-0.0479554	0.375539	0.546132	0.0581516	0.0151722	protein_coding	-	ENSG00000096060
FKBP5	6	35586873-35586987	0.0303314	0.0393628	0.000288144	1.1735e-06	-0.082871	-0.0980376	2.30257e-05	1.54191e-07	0.0347452	-0.0637007	0.00694581	-0.014972	0.447364	0.955176	0.168544	0.138059	protein_coding	-	ENSG00000096060
FKBP5	6	35587909-35588051	0.0369899	0.0387644	1.19975e-05	1.57725e-06	-0.0834231	-0.0967168	2.25934e-05	2.51241e-07	0.0356126	-0.065747	0.0196166	-0.0860059	0.433585	0.27608	0.00399172	0.0401467	protein_coding	-	ENSG00000096060
FKBP5	6	35604791-35604935	0.0342858	0.0385857	3.85266e-05	5.33923e-06	-0.0813316	-0.0928954	2.74874e-05	2.34099e-06	0.0296342	-0.0523008	-0.0158704	-0.0767867	0.57007	0.37517	3.64195e-13	0.128874	protein_coding	-	ENSG00000096060
FKBP5	6	35610497-35610620	0.0325775	0.0410821	0.000115192	3.13144e-07	-0.0897018	-0.0933908	5.21993e-06	4.09828e-07	0.0270272	-0.0122669	0.0360426	-0.0556684	0.861823	0.467042	0.0471198	1.1545e-08	protein_coding	-	ENSG00000096060
FLNB	3	58156302-58157982	-0.0501113	-0.0256838	1.09323e-08	0.00190285	0.0648962	0.00344516	0.00144465	0.855531	0.0970363	-0.0117455	0.020102	0.15596	0.212908	0.0177325	0.00177603	0.0329763	protein_coding	+	ENSG00000136068
FLT1	13	28874489-28877505	0.0526243	0.0213762	1.43415e-09	0.0023	-0.0842148	-0.0725132	3.35641e-05	7.88394e-06	0.100068	-0.0995155	-0.00843446	0.0376686	0.0516204	0.718353	0.698273	0.0738316	protein_coding	-	ENSG00000102755
FLT1	13	28886130-28886235	0.0461973	NA	2.87862e-07	NA	-0.0199025	NA	0.331702	NA	0.10069	-0.0658049	NA	NA	0.118109	NA	0.176196	NA	protein_coding	-	ENSG00000102755
FLT1	13	28896927-28897083	0.0441992	NA	8.25538e-07	NA	-0.0155959	NA	0.447082	NA	0.0305906	-0.0222126	NA	NA	0.811967	NA	7.17138e-12	NA	protein_coding	-	ENSG00000102755
FLT1	13	28931691-28931822	0.0424435	NA	1.14154e-06	NA	-0.033581	NA	0.0929591	NA	0.00557949	0.0110531	NA	NA	0.976575	NA	2.08839e-14	NA	protein_coding	-	ENSG00000102755
FLT1P1	3	46183850-46185169	0.0427586	0.0155885	8.69034e-07	0.014987	-0.0395515	-0.0460226	0.0479835	0.00166591	-0.0184297	-0.048516	0.0122806	-0.0391204	0.665082	0.638765	3.67763e-11	0.311868	pseudogene	-	ENSG00000229515
FNBP1L	1	94016504-94020218	0.0337702	0.00582729	9.8639e-06	0.393173	-0.0727506	0.00354816	3.92907e-05	0.820556	0.11941	-0.0607644	0.149758	0.144126	0.024546	8.8788e-06	0.0994461	0.0987781	protein_coding	+	ENSG00000137942
FOS	14	75745477-75745826	0.00542363	-0.0127875	0.545778	0.201024	0.027037	0.00557463	0.190246	0.810832	0.213648	-0.212142	-0.0291651	-0.0667881	4.37541e-06	0.542422	0.140639	0.1228	protein_coding	+	ENSG00000170345
FOXJ2	12	8205358-8208099	0.0464493	0.0299025	2.90773e-08	0.00110077	-0.0841126	-0.0159947	1.49382e-05	0.446659	0.0113827	-0.0656076	0.0836328	-0.0485869	0.501893	0.283672	0.474586	0	protein_coding	+	ENSG00000065970
FOXJ3	1	42660561-42660735	0.0113	0.00481569	0.149637	0.429009	0.0163554	0.000459611	0.363798	0.973576	0.0119815	-0.0273321	0.116338	-0.170231	0.855123	4.91587e-06	0.0859125	0.0954172	protein_coding	-	ENSG00000198815
FOXN3-AS1	14	89883698-89884140	-0.00367049	0.0410424	0.676212	5.20188e-06	0.00648605	-0.00897999	0.748289	0.658428	-0.0518263	0.0609742	0.0373999	-0.0263237	0.393951	0.737447	0.33011	0.200939	antisense	+	ENSG00000258920
FOXO1	13	41129817-41133171	0.0564432	0.017092	1.70886e-12	0.00942928	-0.09993	-0.0396566	6.94843e-08	0.00853308	-0.0413949	0.000751633	-0.000976383	-0.0736636	0.699713	0.244232	0.147715	0.0671522	protein_coding	-	ENSG00000150907
FOXO1	13	41133646-41134997	0.0398855	0.0127781	1.51298e-06	0.0371893	-0.0433463	0.000967852	0.022979	0.944762	-0.0204503	-0.034191	0.0266738	-0.153306	0.765153	0.000937753	4.01742e-17	0.229863	protein_coding	-	ENSG00000150907
FOXO1	13	41239720-41240734	0.0369815	0.00597596	7.11723e-06	0.374133	-0.0282465	-0.015315	0.132726	0.318277	-0.0169496	-0.0385333	0.0139389	-0.12066	0.738884	0.0280427	5.85711e-11	0.205923	protein_coding	-	ENSG00000150907
FOXO3	6	109001030-109005977	0.0575007	0.0174818	3.26006e-12	0.00191323	-0.0988659	-0.0249443	2.94e-07	0.0523026	-0.0678648	-0.028448	-0.00967269	-0.00783564	0.352062	0.937539	0.141106	0.0266825	protein_coding	+	ENSG00000118689
FRMD4A	10	13685706-13689035	0.0770733	-0.0136442	2.2e-16	0.133971	-0.0958173	0.0285789	1.47818e-08	0.176481	0.0829968	-0.0279052	-0.00516362	0.0815654	0.16042	0.42586	0.331879	0.343766	protein_coding	-	ENSG00000151474
FRMD4A	10	13696416-13696526	0.0445036	-0.021464	2.1555e-07	0.0198305	-0.0458417	0.00478605	0.0197647	0.819416	0.114389	-0.0827135	0.0269926	-0.000398904	0.0417523	0.894001	0.139179	0.256409	protein_coding	-	ENSG00000151474
FRMD4A	10	13698636-13699522	0.0474181	-0.01012	1.15841e-08	0.256026	-0.0365325	0.0348125	0.0537966	0.0879814	0.0795663	-0.0267123	0.0681602	-0.0053493	0.277331	0.46937	7.33561e-10	0.353522	protein_coding	-	ENSG00000151474
FRMD4A	10	13701323-13701490	0.0450703	-0.0105844	2.81724e-08	0.173383	-0.033803	0.0516798	0.06797	0.00373763	0.0616399	-0.065409	0.0179056	-0.0432857	0.244574	0.674671	0	0.340086	protein_coding	-	ENSG00000151474
FRMD4A	10	13702316-13702553	0.0484182	-0.0165216	3.98737e-09	0.042385	-0.0496936	0.0324299	0.00793529	0.0804295	0.0893932	-0.0547579	-0.0510381	-0.0703186	0.137838	0.236087	0.137104	0.177091	protein_coding	-	ENSG00000151474
FRMD4A	10	13705453-13705509	0.0500844	0.00226052	1.65586e-08	0.80359	0.00965271	0.0285843	0.630801	0.167119	0.0472356	-0.0529369	0.00249414	-0.0472239	0.476303	0.738178	1.34109e-15	2.58657e-12	protein_coding	-	ENSG00000151474
FRMD4A	10	13708097-13708325	0.0443628	-0.00831102	3.66887e-08	0.283426	-0.0353605	0.019735	0.0542996	0.264981	0.0599109	-0.0281125	-0.0221713	-0.124431	0.4343	0.0470076	5.69686e-16	0.154235	protein_coding	-	ENSG00000151474
FRMD4A	10	13712406-13712528	0.0401066	-0.0113633	1.473e-06	0.153588	-0.0400109	0.0422055	0.0354126	0.0204197	0.0416116	0.00268137	0.00125195	0.00121856	0.717449	0.999374	0.292063	0.240445	protein_coding	-	ENSG00000151474
FRMD4A	10	13734169-13736039	0.0416723	0.00151015	1.32633e-06	0.859553	-0.0488363	0.0315911	0.0145423	0.107441	0.0326611	-0.0120677	-0.0532489	-0.0500288	0.821267	0.393658	1.19099e-10	0.149614	protein_coding	-	ENSG00000151474
FRMD4A	10	13743340-13743478	0.0481397	-0.0146752	1.93882e-08	0.0829454	-0.0174057	0.0166833	0.369662	0.386483	0.107211	-0.0410392	-0.00537136	-0.0871623	0.10536	0.299534	1.76415e-13	5.75718e-18	protein_coding	-	ENSG00000151474
FRMD4A	10	13779844-13779930	0.0379457	NA	9.89206e-06	NA	-0.0245042	NA	0.211532	NA	0.0740941	0.0140573	NA	NA	0.357413	NA	0	NA	protein_coding	-	ENSG00000151474
FRMD4A	10	13782194-13782251	0.039262	NA	7.06897e-06	NA	0.0125863	NA	0.526434	NA	0.0747	0.0387251	NA	NA	0.288008	NA	0.163251	NA	protein_coding	-	ENSG00000151474
FRMD4A	10	13838496-13838588	0.037858	NA	7.08072e-06	NA	-0.0318703	NA	0.0965963	NA	0.0975964	-0.0532016	NA	NA	0.116817	NA	0.191634	NA	protein_coding	-	ENSG00000151474
FTH1	11	61734461-61734638	-0.0101877	-0.00346465	0.242523	0.709481	0.0467299	-0.0378312	0.0207456	0.0751753	0.167487	-0.254374	-0.0192068	-0.0911721	2.4922e-06	0.319465	0.43921	0.205144	protein_coding	-	ENSG00000167996
FZD10	12	130647004-130650285	-0.0116571	0.00384101	0.190956	0.675546	0.0314509	0.111758	0.126814	2.29689e-07	0.100032	0.023553	0.0426317	0.05259	0.172236	0.509213	0.208241	0.388006	protein_coding	+	ENSG00000111432
FZD10-AS1	12	130634894-130638143	0.00146091	0.0430871	0.877098	7.57829e-06	0.0236737	0.0211137	0.283047	0.34488	0.0755499	-0.100162	0.173678	-0.0810715	0.150689	0.0122618	5.61539e-10	0.598337	processed_transcript	-	ENSG00000250208
FZD4	11	86656721-86663512	0.0396692	-0.002099	1.4777e-06	0.769147	-0.034574	-0.00176013	0.0656622	0.91457	-0.0414427	0.0366282	0.130157	0.0509539	0.586084	0.00691585	0.356045	0.000470097	protein_coding	-	ENSG00000174804
FZD8	10	35927177-35930362	-0.0551507	-0.00240785	1.98551e-10	0.79374	0.104185	0.0457425	2.86403e-07	0.0306491	0.120773	-0.0272271	0.0619454	0.086905	0.081903	0.183835	0	0.204224	protein_coding	-	ENSG00000177283
GADD45A	1	68153344-68154021	-0.00922323	-0.0411817	0.328318	1.59401e-06	-0.0119972	0.0072588	0.585442	0.709393	-0.0192249	0.0224607	-0.00716365	-0.0302795	0.898156	0.856603	0.569932	1.72793e-13	protein_coding	+	ENSG00000116717
GADD45B	19	2476527-2476628	0.0476507	0.0233251	3.07374e-08	0.00986994	-0.056088	-0.046238	0.00425332	0.0248073	0.0402468	-0.0475482	-0.0187987	0.0628105	0.548661	0.559222	0.168355	0.131227	protein_coding	+	ENSG00000099860
GADD45B	19	2477027-2477249	0.045505	0.0236132	1.46418e-07	0.00692647	-0.0541355	-0.0160688	0.00660673	0.42066	0.0273801	-0.035895	-0.0248104	0.0181161	0.739142	0.868791	0.0954672	0.0556611	protein_coding	+	ENSG00000099860
GADD45B	19	2477486-2478257	0.0420271	0.0202559	8.78235e-07	0.00936003	-0.0643277	-0.0521464	0.0011162	0.00355231	0.0632414	-0.00732593	-0.0566777	0.0259887	0.489698	0.46757	0.283246	1.88809e-16	protein_coding	+	ENSG00000099860
GALE	1	24124607-24125603	-0.0118912	-0.00430415	0.179935	0.635757	0.00495083	-0.0198457	0.808511	0.338248	0.167839	0.105188	0.241609	0.24751	0.00167507	1.32388e-08	0.102514	0.287556	protein_coding	-	ENSG00000117308
GALNT11	7	151818631-151819425	0.00400803	0.0134257	0.650554	0.0614899	0.00607461	-0.0859698	0.766122	3.19535e-07	-0.109744	-0.00378348	0.0160438	0.1858	0.14045	0.000567607	0.356284	0.0248939	protein_coding	+	ENSG00000178234
GAREM	18	29843506-29848731	-0.048469	-0.0173147	5.7946e-09	0.024099	0.0956428	0.0640935	1.0566e-06	0.00030416	0.131872	0.0172518	0.112134	0.131192	0.0402057	0.00165366	0.145236	1.01536e-09	protein_coding	-	ENSG00000141441
GART	21	34870940-34871404	-0.00351038	-0.0129833	0.698222	0.141231	0.04046	0.0130527	0.0514993	0.515597	-0.0179051	0.00664012	0.0291857	0.303455	0.945619	2.06072e-06	2.99265e-16	0	protein_coding	-	ENSG00000159131
GAS5	1	173833038-173834685	-0.0441639	-0.0191779	8.23243e-08	0.0100624	0.0255712	-0.0313611	0.172953	0.0667312	0.109563	-0.0167463	0.0138839	0.0865925	0.093691	0.211048	0.496324	0	processed_transcript	-	ENSG00000234741
GAS8	16	90108878-90108943	0.00416098	0.00362572	0.658636	0.693935	0.0159996	-0.0118113	0.461326	0.576082	0.00887898	-0.0050091	0.0750745	0.294667	0.986121	5.00239e-06	0.14012	3.21383e-08	protein_coding	+	ENSG00000141013
GBA2	9	35740523-35740625	0.000736102	-0.00927585	0.935285	0.315884	-0.00771302	0.0207099	0.712788	0.328899	0.123479	0.0903175	0.26092	0.144834	0.0270803	2.30329e-06	0.242526	0.0701664	protein_coding	-	ENSG00000070610
GBA2	9	35740822-35741061	-0.0109867	-0.00612441	0.21865	0.50271	-0.0158358	0.0207546	0.443214	0.322897	0.0941185	0.0199074	0.253902	0.149233	0.224641	2.16532e-06	0.0172676	0.0711114	protein_coding	-	ENSG00000070610
GBF1	10	104122232-104122421	0.0112299	0.00542962	0.1935	0.47812	-0.0117483	0.0163273	0.554547	0.349792	0.125149	-0.0340039	0.226851	-0.126907	0.059149	1.80053e-06	0.16681	2.77302e-10	protein_coding	+	ENSG00000107862
GCFC2	2	75889832-75891909	-0.00879118	-0.00541047	0.238351	0.428162	0.0770538	-0.0262052	9.37253e-06	0.0976784	0.0375528	-0.00600517	0.0440256	0.0234399	0.717477	0.502221	0.420996	0.469733	protein_coding	-	ENSG00000005436
GCLC	6	53362139-53363765	-0.0524683	0.015665	5.40341e-10	0.0591112	0.0787985	-0.0863632	6.21237e-05	9.04513e-06	0.0213183	-0.00249886	0.00679816	0.0797049	0.922198	0.360024	0.24164	9.98202e-12	protein_coding	-	ENSG00000001084
GGCX	2	85776193-85777249	-0.00880026	0.0389905	0.31636	6.92316e-06	0.000537838	-0.0634575	0.979071	0.00125673	-0.00523056	0.152197	0.0940936	0.103379	0.0436997	0.0324284	0.192701	0.255989	protein_coding	-	ENSG00000115486
GJA5	1	147228332-147231379	-0.0258797	-0.0028831	0.00494651	0.76419	0.112216	0.0629082	3.03282e-07	0.00440601	0.184802	-0.075808	0.108888	0.108449	0.00423677	0.0375541	0.532216	2.36384e-12	protein_coding	-	ENSG00000143140
GLCCI1	7	8125823-8128710	-0.0449288	-0.0218397	6.2359e-08	0.00838583	0.0672208	0.02188	0.000506017	0.252049	-0.00913991	-0.0695697	0.127431	0.0316681	0.45541	0.0406082	0.497187	0	protein_coding	+	ENSG00000106415
GMEB2	20	62218955-62222082	0.020879	0.0344539	0.00755694	7.13879e-06	-0.0162499	-0.01725	0.369903	0.319949	0.0762822	0.0907983	0.0172627	0.204415	0.0628871	0.00030907	0	1.49915e-09	protein_coding	-	ENSG00000101216
GNG7	19	2511218-2515145	0.0468437	0.029023	4.83441e-09	0.000950689	-0.074035	-0.0115557	6.97565e-05	0.564968	0.0876853	0.116398	0.110195	0.16239	0.0182255	0.00232912	0.627362	0.0597914	protein_coding	-	ENSG00000176533
GORASP1	3	39138150-39139980	-0.00990244	0.00435188	0.191408	0.578015	-0.0174773	-0.0394706	0.322698	0.0287725	0.0773743	0.0180928	0.146469	0.210172	0.251457	3.16353e-06	0.15769	0.0866457	protein_coding	-	ENSG00000114745
GORASP1	3	39140232-39140994	0.000115017	-0.0129997	0.989918	0.159419	-0.00856013	-0.03393	0.683134	0.108228	0.0707157	-0.0694463	0.254794	0.201887	0.259877	3.69629e-07	0.419514	0.104457	protein_coding	-	ENSG00000114745
GORASP1	3	39141796-39142963	0.0132039	-0.00832441	0.144985	0.365418	0.00847066	-0.0243952	0.685849	0.248184	0.0564923	-0.0472311	0.208341	0.203106	0.466428	4.74305e-06	0.420471	0.387163	protein_coding	-	ENSG00000114745
GPAM	10	113909624-113913424	0.00857322	-0.0131997	0.347138	0.133702	-0.05007	0.00261542	0.018986	0.897378	0.024238	-0.0514111	0.224446	0.150994	0.663664	7.71364e-06	0.577885	0	protein_coding	-	ENSG00000119927
GPATCH11	2	37323351-37326387	-0.0407051	-0.0396272	9.64002e-07	7.6113e-08	-0.00181951	0.00484919	0.923438	0.770741	0.0453935	-0.0442209	0.0518877	-0.00529725	0.511875	0.520421	0.304998	0.162673	protein_coding	+	ENSG00000152133
GPR107	9	132897304-132902448	-0.00620363	-0.00158251	0.467844	0.848347	0.00331067	0.0378175	0.868317	0.045416	0.0352013	-0.00354605	0.185061	0.207754	0.809175	7.6011e-07	0.261943	0	protein_coding	+	ENSG00000148358
GPR116	6	46820249-46821808	0.0447791	0.00639211	1.07907e-07	0.402599	-0.0827812	-0.0370804	2.9602e-05	0.035231	0.108436	-0.0662078	0.0401534	0.0601408	0.0741254	0.332888	0.236875	7.00503e-09	protein_coding	-	ENSG00000069122
GPR116	6	46825866-46827260	0.0428792	0.0053801	1.03781e-06	0.377783	-0.0585528	-0.0120075	0.00416378	0.388927	0.108203	-0.079641	0.0677519	-0.0629925	0.0710249	0.0769515	0.0130369	0.515388	protein_coding	-	ENSG00000069122
GPR116	6	46836620-46836829	0.0407222	0.0120047	1.65879e-06	0.0426231	-0.0256983	-0.00284717	0.187885	0.832585	-0.0116048	-0.0642634	-0.000961909	-0.0809739	0.520007	0.122168	0	0.193395	protein_coding	-	ENSG00000069122
GPR37	7	124386051-124387397	-0.0543389	0.00156327	1.75554e-09	0.862029	0.0551518	0.0434729	0.00865125	0.0342982	0.102445	-0.0205044	0.0780477	0.0827728	0.190518	0.123918	0.328024	0.297624	protein_coding	-	ENSG00000170775
GPR37	7	124404008-124405681	-0.0445347	0.00324068	1.53306e-06	0.714347	0.0238639	0.0259512	0.266331	0.198713	0.125444	-0.0149168	0.155524	0.0997797	0.0998568	0.00310964	0.145604	2.3946e-19	protein_coding	-	ENSG00000170775
GPR4	19	46093025-46095955	-0.0503033	-0.000370574	1.23921e-08	0.965981	0.0684624	0.0175012	0.000823527	0.379969	0.205873	0.0389144	0.0772888	0.0399944	0.000748082	0.276376	0.194861	6.99461e-12	protein_coding	-	ENSG00000177464
GRAMD3	5	125828607-125830063	-0.0457158	-0.020864	3.9957e-07	0.00983567	-0.0108797	0.0015068	0.603062	0.935927	-0.0513127	-0.0285115	0.0934216	0.223439	0.595966	4.08357e-05	0.116663	0.263923	protein_coding	+	ENSG00000155324
GRB10	7	50657760-50660795	0.0550276	0.00235065	9.64858e-10	0.787128	-0.0873951	-0.0376758	2.72564e-05	0.060549	0.0787621	-0.0688134	0.133685	0.109681	0.208837	0.00701867	0.445338	0	protein_coding	-	ENSG00000106070
GRB10	7	50674034-50674765	0.0422201	0.0216403	2.84488e-06	0.00316409	-0.0222469	-0.0270225	0.284942	0.106041	0.0102031	-0.013976	0.112247	0.0709061	0.960415	0.0125781	0.179571	0.358639	protein_coding	-	ENSG00000106070
GS1-124K5.11	7	66006229-66007536	0.00780857	0.000384843	0.257305	0.961898	0.0768374	0.0328782	1.89716e-06	0.074609	0.0867249	0.105868	0.0379378	0.0933352	0.00863285	0.157671	0.255099	0.290881	lincRNA	-	ENSG00000229180
GSE1	16	85694752-85695371	0.0388595	0.00825019	3.03976e-06	0.253832	-0.0233362	0.00537109	0.220066	0.745191	0.00997363	0.0148759	0.0990456	-0.0193747	0.946176	0.087502	0.0128119	0.343155	protein_coding	+	ENSG00000131149
GSE1	16	85695897-85697220	0.0382535	0.0121841	4.34099e-06	0.0861907	-0.0386189	-0.0116103	0.0430098	0.473946	-0.0336974	-0.00301586	0.0900456	-0.0650347	0.807523	0.0607126	1.77336e-13	0.442769	protein_coding	+	ENSG00000131149
GSE1	16	85699582-85699953	0.0396812	0.0101835	6.27229e-06	0.163639	-0.0346145	-0.0131387	0.085734	0.430829	0.00779255	-0.0391808	0.149207	-0.0922334	0.799537	0.00130564	0.117126	0.0114911	protein_coding	+	ENSG00000131149
GSE1	16	85706011-85709810	0.053919	0.0036037	4.42004e-10	0.671163	-0.0951908	-0.0548105	1.99774e-06	0.00567902	0.0403655	-0.0303254	0.10711	0.0134908	0.666182	0.133657	0.403291	1.54943e-09	protein_coding	+	ENSG00000131149
GTF2E1	3	120499890-120501916	-0.0429834	-0.0228867	7.56423e-07	0.0035058	0.0453969	-0.00123034	0.0236137	0.945155	0.0949469	0.0181326	0.0546442	0.0591384	0.202886	0.260302	1.00009e-10	0	protein_coding	+	ENSG00000153767
GTF2IRD1	7	74015287-74016931	0.0165929	-0.0370721	0.0490142	1.24363e-06	-0.0560934	0.0127459	0.00399812	0.461161	-0.0379154	-0.0754664	-0.0112446	0.102176	0.301555	0.13517	3.30806e-08	0.206262	protein_coding	+	ENSG00000006704
HADH	4	108930915-108931043	0.0157787	-0.00161728	0.0351351	0.861079	-0.0116792	0.0118718	0.509767	0.574519	0.00680447	0.0773403	0.161989	0.29757	0.327899	1.17699e-07	0.369541	0.212143	protein_coding	+	ENSG00000138796
HADH	4	108935587-108935744	0.0111227	-0.00114665	0.129705	0.900782	-0.0181565	0.0272333	0.300001	0.195108	0.0255552	0.0929228	0.210929	0.202004	0.164302	2.39709e-06	0.3394	0	protein_coding	+	ENSG00000138796
HADH	4	108954156-108954448	0.00562321	-0.00425142	0.437637	0.629658	-0.0184543	-0.0272198	0.287144	0.179779	0.0129727	0.0599094	0.0959953	0.294718	0.479663	7.68315e-07	0.437441	0	protein_coding	+	ENSG00000138796
HADH	4	108955395-108956331	0.00281946	-0.00133961	0.695893	0.877625	-0.0156016	-0.00544094	0.363029	0.786497	-0.0223479	0.157425	0.100965	0.265351	0.00878469	5.73756e-06	0.282412	0.264078	protein_coding	+	ENSG00000138796
HADHB	2	26508275-26508439	-0.0212527	-0.0130649	0.013772	0.129043	0.0278816	0.0180949	0.160931	0.358083	-0.0648687	0.0752887	0.130615	0.25304	0.227482	2.66241e-06	0.227492	0.266298	protein_coding	+	ENSG00000138029
HAS3	16	69148246-69151571	-0.00272908	-0.0197824	0.773647	0.0340559	0.0862198	0.0531855	0.000110713	0.0135203	0.102857	-0.10146	0.235056	0.219933	0.0775224	4.28499e-07	0.428931	0.165232	protein_coding	+	ENSG00000103044
HBB	11	5246694-5246956	0.0283277	0.0105374	0.0021624	0.206429	0.00985645	-0.0133797	0.643902	0.483937	0.0913007	-0.0428706	0.193229	0.315417	0.243516	1.50564e-10	0.246945	0	protein_coding	-	ENSG00000244734
HBB	11	5247493-5248053	0.0272085	0.0114763	0.00323846	0.169384	0.00671342	-0.00541983	0.753329	0.776993	0.0937759	-0.0376928	0.204937	0.33189	0.24063	1.47518e-11	0.253577	0	protein_coding	-	ENSG00000244734
HBB	11	5248160-5248427	0.0264515	0.0118681	0.00350468	0.143292	0.00540432	-0.00731625	0.796435	0.692536	0.100786	-0.0325079	0.185544	0.299288	0.191736	5.08403e-10	0.279967	4.51155e-10	protein_coding	-	ENSG00000244734
HBEGF	5	139712428-139713865	-0.0113839	-0.0256696	0.207508	0.00419055	-0.00394963	0.048283	0.850821	0.0186359	0.130475	0.016692	0.151975	0.242599	0.0698177	4.3169e-06	0	0.0259031	protein_coding	-	ENSG00000113070
HCFC1	X	153213004-153214837	0.0071529	0.0422935	0.357207	2.2983e-08	-0.00987594	-0.0447488	0.581701	0.00885241	0.0450236	0.0830647	-0.018365	0.0871399	0.174544	0.210946	0.134492	0.0556401	protein_coding	-	ENSG00000172534
HDAC5	17	42169749-42169895	0.0393326	-0.00401783	6.0465e-06	0.642543	-0.0218469	0.0667444	0.269709	0.000777352	0.0384283	0.0719552	0.0538859	0.00649302	0.344656	0.595809	0.25596	0.316367	protein_coding	-	ENSG00000108840
HDHD2	18	44633782-44635156	-0.0188268	-0.00844956	0.0196258	0.28119	-0.010153	-0.0201765	0.583754	0.263907	0.0709433	0.0768058	0.0998278	0.255264	0.128424	9.36417e-07	0.0103974	0.261082	protein_coding	-	ENSG00000167220
HECW2	2	197063977-197066112	0.0782371	0.0286369	2.2e-16	0.000144757	-0.150427	-0.0507256	4.44089e-15	0.00325139	0.0642481	0.0101241	0.0230636	0.042964	0.423772	0.594758	0.273755	0.267615	protein_coding	-	ENSG00000138411
HECW2	2	197085519-197085665	0.0511567	NA	4.58347e-09	NA	-0.0879541	NA	1.40409e-05	NA	0.0339049	0.00148029	NA	NA	0.822039	NA	0.25742	NA	protein_coding	-	ENSG00000138411
HECW2	2	197183276-197184628	0.0634525	NA	9.99201e-14	NA	-0.0671175	NA	0.000609481	NA	-0.0344446	0.0351631	NA	NA	0.682672	NA	0.0393786	NA	protein_coding	-	ENSG00000138411
HEMK1	3	50606583-50609232	0.0502954	0.0188463	4.37096e-08	0.0491313	0.00932251	-0.0388761	0.657913	0.0761295	0.0476549	0.0220467	0.173952	0.135127	0.6476	0.00109397	0.411081	0.439689	protein_coding	+	ENSG00000114735
HEMK1	3	50609546-50609639	0.0432005	0.00484286	2.02856e-06	0.597234	-0.0154279	-0.0416012	0.456738	0.047054	0.00419378	0.0401391	-0.00583745	0.154279	0.798912	0.0434834	0.176736	4.69265e-11	protein_coding	+	ENSG00000114735
HERC2	15	28356186-28357181	-0.00977178	-0.00185116	0.249351	0.831526	0.00587092	-0.0927883	0.76641	5.10601e-06	-0.0146329	-0.00150534	0.0316588	0.119859	0.962848	0.0998879	0.240609	0	protein_coding	-	ENSG00000128731
HHEX	10	94452459-94452509	-0.0453564	-0.0358085	7.81277e-07	0.000113596	0.0361109	0.0206513	0.0862136	0.325971	0.0481672	-0.0795583	0.0557142	0.0106096	0.320849	0.607493	0.40171	0.368859	protein_coding	+	ENSG00000152804
HHEX	10	94454304-94455403	-0.0512769	-0.0413178	2.07634e-10	1.95242e-06	0.0844403	0.0581944	6.36492e-06	0.00325991	0.0151863	-0.114036	0.0649007	0.00713986	0.113776	0.473454	0.0354275	0.170083	protein_coding	+	ENSG00000152804
HIF3A	19	46808299-46808647	0.0370882	0.005091	5.91002e-06	0.546943	-0.053788	-0.030797	0.00455879	0.111929	0.0286496	-0.108397	0.0945763	-0.0529853	0.13783	0.144986	1.41688e-09	0.392287	protein_coding	+	ENSG00000124440
HIF3A	19	46811920-46812032	0.0347808	0.00213635	9.90399e-06	0.782196	-0.0298812	-0.00188696	0.0980982	0.914615	-0.0280766	-0.0637684	0.0539014	0.0171353	0.402783	0.49346	0.228142	0.0974011	protein_coding	+	ENSG00000124440
HIF3A	19	46812408-46812616	0.0393501	0.0110621	5.75323e-07	0.174378	-0.0262291	0.00696024	0.149619	0.708344	0.0136611	-0.100515	0.0966382	-0.0818329	0.174099	0.0659646	0.472097	0.243517	protein_coding	+	ENSG00000124440
HIF3A	19	46815418-46816630	0.0434392	0.00795546	2.12653e-09	0.270984	-0.0462999	-0.0300621	0.0058512	0.0697535	0.0195053	-0.0867059	0.0807131	-0.0490938	0.204057	0.137195	0.572308	0.39853	protein_coding	+	ENSG00000124440
HIF3A	19	46817180-46817638	0.0478803	NA	7.99045e-11	NA	-0.0369323	NA	0.0274542	NA	0.0124039	-0.0815811	NA	NA	0.249395	NA	0.591679	NA	protein_coding	+	ENSG00000124440
HIF3A	19	46823700-46823818	0.0368999	-0.00193714	7.65299e-06	0.814333	-0.0692742	-0.024999	0.00029737	0.185231	0.0012078	-0.162382	0.032634	-0.0332984	0.0160946	0.70049	0.290339	0.196156	protein_coding	+	ENSG00000124440
HIF3A	19	46825033-46825223	0.0390138	0.000937776	1.03767e-06	0.913028	-0.0627402	-0.025545	0.000706029	0.195345	0.0335945	-0.166625	0.0699421	0.0146321	0.00829716	0.409247	0.147227	0.0663523	protein_coding	+	ENSG00000124440
HIF3A	19	46828792-46828896	0.0459858	0.0132746	2.1537e-07	0.150671	-0.0531344	-0.0320271	0.00849167	0.130346	-0.0440436	-0.0787447	0.0626724	-0.0237729	0.273328	0.5321	0.18343	0	protein_coding	+	ENSG00000124440
HIF3A	19	46832338-46832735	0.0535808	0.00977912	2.11414e-09	0.263012	-0.0417962	-0.0169118	0.0409129	0.397949	-0.0335004	-0.0735511	0.0404641	-0.0807831	0.381958	0.31867	0.167242	0.294485	protein_coding	+	ENSG00000124440
HIF3A	19	46834413-46834770	0.0437718	0.0139537	1.25564e-06	0.136362	-0.052157	-0.0266684	0.0114521	0.213255	-0.044047	0.00829396	-0.0165397	0.0442214	0.724488	0.762842	0.335301	2.10685e-20	protein_coding	+	ENSG00000124440
HIF3A	19	46838162-46838243	0.0435266	-0.0134405	1.29276e-06	0.154334	-0.0623933	-0.0404074	0.00246146	0.0599732	0.0235851	-0.0676999	-0.0127774	0.0352498	0.497749	0.841111	0	0.235672	protein_coding	+	ENSG00000124440
HIF3A	19	46842782-46846690	0.0495655	0.00395515	3.6713e-08	0.667725	-0.0922256	-0.0559112	1.35181e-05	0.00833779	-0.0151516	-0.122449	0.0183589	-0.0254416	0.131308	0.881623	0.26353	0.330752	protein_coding	+	ENSG00000124440
HIVEP2	6	143072604-143075068	-0.0451298	-0.0007081	1.96377e-07	0.936159	0.0250096	-0.0429996	0.207286	0.0364509	-0.0754811	0.0239404	0.0358147	0.0906943	0.344725	0.240913	0.409935	0	protein_coding	-	ENSG00000010818
HK2	2	75061108-75061770	0.0450618	0.000900629	1.31108e-07	0.910163	-0.0520459	0.00211696	0.00764675	0.907462	0.0114124	-0.040024	0.130716	-0.0978022	0.770376	0.00856441	0.0339666	0.14712	protein_coding	+	ENSG00000159399
HK2	2	75081420-75081582	0.0448797	NA	5.68433e-08	NA	-0.070407	NA	0.000201965	NA	-0.00610951	-0.0460686	NA	NA	0.702699	NA	0.0461732	NA	protein_coding	+	ENSG00000159399
HK2	2	75094763-75095034	0.0496073	NA	4.58708e-09	NA	-0.0723299	NA	0.000183955	NA	0.0240473	-0.034286	NA	NA	0.754251	NA	0.151126	NA	protein_coding	+	ENSG00000159399
HK2	2	75099427-75099546	0.0419197	NA	8.11286e-07	NA	-0.0675426	NA	0.000485396	NA	0.0552132	-0.0445303	NA	NA	0.435246	NA	0.105824	NA	protein_coding	+	ENSG00000159399
HK2	2	75100971-75101070	0.0390049	NA	3.9667e-06	NA	-0.0504884	NA	0.00873155	NA	-0.000594507	-0.089381	NA	NA	0.289546	NA	0.0515272	NA	protein_coding	+	ENSG00000159399
HK2	2	75104293-75104448	0.0511012	NA	3.55288e-09	NA	-0.0736763	NA	0.000192158	NA	0.0347613	-0.00903768	NA	NA	0.802932	NA	0	NA	protein_coding	+	ENSG00000159399
HK2	2	75105815-75106048	0.0505859	NA	1.38274e-08	NA	-0.0653981	NA	0.00130403	NA	-0.0404589	-0.00766622	NA	NA	0.754804	NA	0	NA	protein_coding	+	ENSG00000159399
HK2	2	75107392-75107696	0.0502918	-0.00420935	7.82567e-09	0.594575	-0.074435	0.00791216	0.000196593	0.660217	-0.0168375	-0.0444447	0.12866	-0.0609295	0.711749	0.0211967	0.0631105	1.62229e-12	protein_coding	+	ENSG00000159399
HK2	2	75108838-75108986	0.0504826	-0.010713	3.86094e-09	0.208475	-0.080208	0.0131963	4.25939e-05	0.497554	-0.0338488	-0.0448283	0.0909579	-0.054866	0.592649	0.163076	1.48596e-09	0.0907273	protein_coding	+	ENSG00000159399
HK2	2	75109247-75109366	0.0452036	NA	3.10434e-07	NA	-0.0764619	NA	0.000160673	NA	-0.0188892	-0.0285306	NA	NA	0.835993	NA	0.0414494	NA	protein_coding	+	ENSG00000159399
HK2	2	75112621-75112716	0.0450365	NA	4.61767e-07	NA	-0.0845858	NA	3.95966e-05	NA	-0.00773633	-0.00556381	NA	NA	0.985557	NA	0	NA	protein_coding	+	ENSG00000159399
HK2	2	75113421-75113520	0.0468488	-0.000317224	7.23022e-08	0.970375	-0.0785395	0.0103494	9.04777e-05	0.594303	0.010291	-0.028886	0.1295	-0.125758	0.872954	0.00684449	0.00429774	2.52835e-12	protein_coding	+	ENSG00000159399
HK2	2	75113617-75113800	0.0404834	-0.00501503	2.14562e-06	0.533533	-0.0897132	0.0254007	6.14932e-06	0.166287	0.000630936	-0.0381822	0.139092	-0.142327	0.805954	0.00120074	1.91713e-11	4.63762e-09	protein_coding	+	ENSG00000159399
HK2	2	75115030-75115185	0.0461614	0.00255914	6.74802e-08	0.750631	-0.0872617	0.0379568	1.07758e-05	0.0390614	-0.0360964	-0.0163117	0.131484	-0.142132	0.760942	0.001742	5.73534e-11	2.09601e-09	protein_coding	+	ENSG00000159399
HK2	2	75116372-75116605	0.0527368	0.00588469	2.12826e-09	0.485872	-0.0717357	0.0401274	0.000351278	0.0373446	-0.0566343	-0.0492674	0.168517	-0.05215	0.406876	0.00469888	0.047755	0.35553	protein_coding	+	ENSG00000159399
HK2	2	75117924-75120486	0.0610696	-0.0238808	3.60156e-13	0.00851523	-0.107935	0.0118539	3.48516e-08	0.568092	-0.0498861	-0.000232537	0.171601	0.0492159	0.63369	0.00626172	0.389879	0.201792	protein_coding	+	ENSG00000159399
HK2P1	X	79827370-79830106	0.0512754	0.00257977	3.14218e-09	0.742284	-0.0803657	0.0192414	5.01678e-05	0.281238	-0.0326058	-0.0563676	0.146784	-0.125134	0.51123	0.00111837	2.34157e-13	0.199829	pseudogene	-	ENSG00000228612
HLF	17	53342321-53342960	0.0398551	0.0151716	8.02735e-07	0.0192119	-0.0743211	-0.0265533	6.72487e-05	0.0716273	-0.0348333	0.0119641	0.0239562	0.0199107	0.774224	0.737815	1.17854e-09	3.30762e-12	protein_coding	+	ENSG00000108924
HLF	17	53345112-53345447	0.050394	0.0188821	5.25777e-10	0.0036695	-0.0786057	-0.0203993	2.78972e-05	0.167488	-0.0185527	-0.0543433	0.0126956	-0.0225557	0.570136	0.841105	0.120789	0.0723199	protein_coding	+	ENSG00000108924
HLF	17	53392588-53392808	0.0476887	0.0225509	4.91015e-09	0.00080135	-0.0959397	-0.0213877	4.293e-07	0.161598	0.00450594	-0.0311077	0.00273033	-0.0213567	0.854106	0.892469	0.0857662	0.0626105	protein_coding	+	ENSG00000108924
HLF	17	53398025-53402426	0.0598213	0.0311246	3.9968e-15	6.19466e-05	-0.132476	-0.0887027	1.88738e-13	9.24918e-07	-0.0475227	0.0459928	-0.0595684	0.0421002	0.421805	0.364623	0.441169	0.194381	protein_coding	+	ENSG00000108924
HMGCS1	5	43289497-43291322	-0.0512614	-0.00618426	4.2199e-10	0.466213	0.058222	-0.0101728	0.00188101	0.60055	-0.00601061	0.0046589	0.0787194	0.108321	0.989642	0.0434647	0.437724	0.221019	protein_coding	-	ENSG00000112972
HMGCS2	1	120301741-120302037	NA	0.00267225	NA	0.771142	NA	0.0157068	NA	0.455237	NA	NA	0.185748	0.213866	NA	8.91311e-06	NA	0.163324	protein_coding	-	ENSG00000134240
HOOK2	19	12876917-12877054	0.0319639	0.00803659	8.67045e-06	0.376657	-0.0274464	-0.0468769	0.0994841	0.0259385	-0.0283679	-0.00875492	0.0548064	0.0936158	0.804465	0.185353	0.140282	0.0348828	protein_coding	-	ENSG00000095066
HOOK2	19	12878209-12878278	0.0346305	0.00592679	8.6905e-06	0.512854	-0.0215276	-0.0422217	0.223855	0.0419882	-0.0296003	-0.0198942	0.0197722	0.101681	0.757085	0.224366	0.0151142	0.374483	protein_coding	-	ENSG00000095066
HOOK2	19	12881746-12881886	0.0418853	0.0157608	7.20014e-07	0.0705436	-0.0147775	-0.0461377	0.444962	0.022939	0.0200796	-0.0142609	0.071127	0.10124	0.906397	0.0894812	0.11739	1.1127e-13	protein_coding	-	ENSG00000095066
HOOK2	19	12881973-12882133	0.0394132	0.0204785	5.72528e-06	0.0246414	-0.0398511	-0.0379374	0.0452354	0.0719092	0.0160173	-0.0143788	0.0770515	0.128997	0.932239	0.0389228	2.10345e-09	0.0065577	protein_coding	-	ENSG00000095066
HOOK2	19	12882211-12882291	0.0441663	0.00909648	7.33431e-07	0.301754	-0.0591658	-0.0421755	0.00378011	0.0371451	-0.0143287	-0.0359727	0.0591416	0.131346	0.795779	0.0417638	0.0118411	0.49188	protein_coding	-	ENSG00000095066
HOOK2	19	12883427-12883494	0.0491338	0.0107479	4.4615e-08	0.229963	-0.0276858	-0.0470236	0.171707	0.0224098	0.0463329	0.0254465	0.0146064	0.139347	0.615624	0.064855	0	0.268578	protein_coding	-	ENSG00000095066
HOOK2	19	12883594-12883726	0.0423697	0.0117863	7.65119e-07	0.156267	-0.0342521	-0.038927	0.0797136	0.0418371	0.0462044	-0.00172764	0.0170981	0.104238	0.679643	0.162651	0.112615	0.301354	protein_coding	-	ENSG00000095066
HOOK2	19	12885483-12885555	0.039941	0.00995739	2.40924e-06	0.221019	-0.0464243	-0.0467398	0.0154362	0.0126085	-0.0044916	-0.00332122	-0.0416101	0.034909	0.994003	0.610198	0	0.125166	protein_coding	-	ENSG00000095066
HOOK2	19	12885626-12885711	0.0416829	0.0169419	5.13508e-07	0.0506242	-0.0292048	-0.0386156	0.120159	0.0526575	-0.027406	0.000362206	0.00527808	0.0138392	0.864383	0.965702	0	0.452754	protein_coding	-	ENSG00000095066
HOXA-AS2	7	27161536-27162996	-0.0173511	-0.0189097	0.0498607	0.0380051	0.0979934	0.0140036	2.25511e-06	0.502679	0.0826159	0.00759644	0.205071	0.162816	0.319517	3.21962e-05	0.0655159	0.0533844	antisense	+	ENSG00000253552
HOXB2	17	46620017-46621109	-0.00440113	0.00714474	0.597496	0.435222	0.0702355	-0.00708039	0.000370388	0.739306	0.168902	0.118483	0.129481	0.292127	0.000675922	1.5306e-06	0.221303	1.7741e-17	protein_coding	-	ENSG00000173917
HR	8	21977855-21978020	0.0190152	-0.0177896	0.031501	0.0232591	0.0136082	0.0811232	0.499338	7.61548e-06	-0.00800507	0.0272425	0.149581	0.0870715	0.892547	0.00173435	0	0.401974	protein_coding	-	ENSG00000168453
HR	8	21978229-21978471	0.0127258	-0.0174125	0.152097	0.0223749	-0.0279117	0.0797406	0.171772	5.9303e-06	0.0571309	0.100804	0.131915	0.0969378	0.122884	0.0024539	0.0750869	0.161444	protein_coding	-	ENSG00000168453
HSPA12B	20	3721462-3721559	0.0375295	0.00861819	8.37522e-06	0.337261	-0.0471032	0.0218302	0.0141423	0.289094	0.0575753	-0.00857772	0.00571111	0.0513083	0.537489	0.688253	0.144007	0.466895	protein_coding	+	ENSG00000132622
HSPA12B	20	3722931-3723055	0.0449246	-9.78545e-05	3.20955e-07	0.990966	-0.0354408	-0.0162979	0.0762493	0.408408	0.0757091	-0.0780082	0.0244719	-0.0495003	0.1689	0.649459	0.299939	0.130874	protein_coding	+	ENSG00000132622
HSPA12B	20	3725549-3725735	0.0446585	-0.00185084	2.23016e-07	0.830493	-0.0757854	-0.00201213	0.00013068	0.919311	0.141659	-0.0967058	0.0151527	-0.00624866	0.00913886	0.958827	0.262516	0.087156	protein_coding	+	ENSG00000132622
HSPA12B	20	3726118-3726244	0.0408758	0.000619495	3.77124e-06	0.944089	-0.0628123	-0.0239271	0.00197533	0.234121	0.0924472	-0.0774664	0.0241467	-0.0842678	0.11514	0.341836	0.138201	4.22248e-12	protein_coding	+	ENSG00000132622
HSPA12B	20	3726562-3726678	0.0498298	0.00399998	4.72008e-09	0.651672	-0.031489	-0.015311	0.103193	0.449879	0.0867931	-0.057856	0.00732349	-0.049786	0.162907	0.704702	0.302329	3.93398e-10	protein_coding	+	ENSG00000132622
HSPA12B	20	3728864-3729038	0.0392558	0.00287935	4.44328e-06	0.737652	-0.0479208	0.0143051	0.0144097	0.46548	0.040158	-0.0172887	0.0782133	-0.11157	0.722833	0.0653609	0.117018	0.109572	protein_coding	+	ENSG00000132622
HSPA12B	20	3730616-3730874	0.0429212	0.00395611	3.95104e-07	0.65561	-0.0820609	-0.00947805	2.79608e-05	0.640262	0.0568772	-0.0521032	0.058374	-0.0814766	0.377893	0.252145	0.604189	0.26027	protein_coding	+	ENSG00000132622
IDH3A	15	78458447-78458815	-0.00430045	-0.0236618	0.62448	0.00749004	-0.0102303	-0.000598859	0.613054	0.976314	-2.01281e-05	-0.0334896	0.190249	0.211675	0.856825	2.16956e-06	0.227017	0.563919	protein_coding	+	ENSG00000166411
IDI1	10	1085848-1087444	-0.04458	-0.0102997	2.81145e-07	0.185079	0.0112383	-0.0154154	0.573767	0.386921	0.0607075	0.0277379	0.0517188	0.111812	0.469632	0.0484012	0.186525	0.577526	protein_coding	-	ENSG00000067064
IFFO2	1	19230774-19235160	0.0560397	0.0335108	3.00837e-10	0.000158965	-0.04182	-0.0875884	0.040701	2.25277e-05	0.107892	0.0407905	-0.177999	-0.0187999	0.108092	0.00619911	0.839715	0	protein_coding	-	ENSG00000169991
IFFO2	1	19236836-19236966	0.0426222	0.028155	3.58234e-06	0.000943361	-0.00608789	-0.0557134	0.772147	0.00417618	0.0505604	-0.0372699	-0.0678399	-0.0865623	0.576667	0.12075	0.0836534	0	protein_coding	-	ENSG00000169991
IFFO2	1	19237878-19237970	0.0417842	0.0309854	3.32007e-06	0.000331103	-0.0153002	-0.0469912	0.45644	0.0172272	0.0433476	0.0301665	-0.0483533	-0.0533957	0.634934	0.410413	0.486423	5.33314e-20	protein_coding	-	ENSG00000169991
IFFO2	1	19238457-19238577	0.0418876	0.0277362	2.71228e-06	0.00118182	-0.0244811	-0.0360672	0.228042	0.0637844	0.100824	0.00513763	-0.0549446	-0.0659777	0.183199	0.275246	0.311058	0	protein_coding	-	ENSG00000169991
IFFO2	1	19243397-19243536	0.0419181	0.0267376	9.08864e-07	0.0014249	-0.0357263	-0.0290889	0.0655238	0.126478	0.13139	-0.00700564	-0.0159599	-0.0761687	0.0450491	0.364053	0.312034	3.5191e-12	protein_coding	-	ENSG00000169991
IFFO2	1	19282162-19283180	0.038556	0.0259357	6.22128e-06	0.00266631	-0.00600402	-0.0197134	0.759311	0.31699	0.128494	0.011739	-0.0220505	-0.0386161	0.0522339	0.719587	0.138077	0.0808493	protein_coding	-	ENSG00000169991
IFRD1	7	112102056-112102234	-0.0319497	-0.00700541	0.000289801	0.38165	0.0610852	0.00179978	0.00283322	0.921887	-0.00677318	-0.0520479	0.208596	0.130444	0.675134	5.75672e-06	0.168939	1.06139e-12	protein_coding	+	ENSG00000006652
IFRD1	7	112112274-112112402	-0.0383657	-0.0330573	6.9201e-06	4.99119e-05	0.0285601	-0.0452499	0.14745	0.0156699	0.0189168	-0.0542481	0.148648	0.185942	0.612952	2.70597e-05	0.194544	0	protein_coding	+	ENSG00000006652
IFRD1	7	112115485-112116247	-0.0410124	-0.0237334	1.31903e-06	0.00242569	0.0322183	-0.0289361	0.100457	0.105817	-0.0150371	0.0512649	0.0755142	0.124047	0.659985	0.0148547	2.11508e-14	8.69949e-08	protein_coding	+	ENSG00000006652
IFRD2	3	50326230-50326791	0.0145354	0.0145714	0.0736943	0.0631215	-0.0290671	-0.0796521	0.123685	9.57151e-06	-0.0129342	0.0381795	0.167864	0.122341	0.771058	0.000124755	0.0374294	0	protein_coding	-	ENSG00000214706
IGHMBP2	11	68699773-68700949	-0.00850599	-0.0253351	0.365437	0.00621041	0.0231656	0.0126709	0.285795	0.547536	0.144972	0.0233508	0.292075	0.158665	0.0446335	6.2877e-08	2.01005e-09	0.298205	protein_coding	+	ENSG00000132740
IL20RA	6	137330025-137330629	NA	-0.0408833	NA	4.87344e-06	NA	0.0505879	NA	0.0136564	NA	NA	-0.0297777	0.0125843	NA	0.856968	NA	0.102487	protein_coding	-	ENSG00000016402
IL37	2	113670548-113670671	NA	-0.00831806	NA	0.284414	NA	0.0225356	NA	0.205972	NA	NA	-0.143252	-0.223568	NA	1.05431e-06	NA	0.0592608	protein_coding	+	ENSG00000125571
IL37	2	113674706-113674825	NA	-0.0126164	NA	0.123464	NA	0.0178926	NA	0.343895	NA	NA	-0.144331	-0.244319	NA	9.43121e-07	NA	0.485232	protein_coding	+	ENSG00000125571
IL37	2	113675212-113675354	NA	-0.0130764	NA	0.0980087	NA	0.0133795	NA	0.462826	NA	NA	-0.140445	-0.231017	NA	1.25354e-06	NA	0.352197	protein_coding	+	ENSG00000125571
IL37	2	113676138-113676459	NA	-0.0171407	NA	0.0345973	NA	0.0114383	NA	0.540008	NA	NA	-0.178487	-0.251744	NA	4.22426e-08	NA	0.302412	protein_coding	+	ENSG00000125571
IL6R	1	154406995-154407176	0.0398274	0.00166666	3.65899e-06	0.832711	0.0319555	0.00663304	0.102857	0.712204	-0.0200306	-0.0348417	0.053959	-0.152414	0.767137	0.0111185	5.82761e-12	2.0745e-10	protein_coding	+	ENSG00000160712
IL6R	1	154437610-154441926	0.0484265	-0.0136331	4.27951e-08	0.141531	-0.0375145	-0.0357058	0.0649683	0.0948713	0.00297314	-0.0721657	0.121623	-0.0918842	0.484717	0.0513993	0.296356	6.0057e-09	protein_coding	+	ENSG00000160712
ILK	11	6628901-6629441	-0.00523216	0.00875388	0.548831	0.341257	0.0317899	-0.00225838	0.119222	0.91446	0.0865564	-0.0205861	0.215976	0.20153	0.281176	3.14888e-06	0.385876	0.0527104	protein_coding	+	ENSG00000166333
INF2	14	105182062-105182354	0.021111	-0.0170642	0.0244019	0.070461	0.028182	0.0109773	0.195901	0.611989	0.167977	0.131833	0.234632	0.158779	0.00172947	9.74155e-06	0.0683264	0.104539	protein_coding	+	ENSG00000203485
INPP1	2	191235570-191236391	-0.0405054	-0.020436	7.97045e-07	0.00517786	0.0336331	0.0232692	0.072809	0.163766	0.0540237	0.00868012	-0.00854591	0.144978	0.555024	0.0135796	0.145168	1.64809e-17	protein_coding	+	ENSG00000151689
INPPL1	11	71946160-71946247	-0.00338399	-0.0142552	0.694398	0.0991417	-0.00963858	-0.00297186	0.629735	0.881185	0.0913212	0.00184666	0.170596	0.225192	0.240463	3.18225e-06	0.289186	0.193369	protein_coding	+	ENSG00000165458
IRAK2	3	10283800-10285427	-0.0206432	-0.0246099	0.0268864	0.00572717	0.0135952	0.10374	0.541163	6.22797e-07	0.0117742	-0.0447409	0.139646	0.114969	0.783791	0.00583352	0.360127	0.110402	protein_coding	+	ENSG00000134070
IRF2BPL	14	77490888-77495034	0.0549469	0.0222051	1.03368e-11	0.00515488	-0.0384514	0.0359764	0.0360731	0.0470868	0.0406645	0.0732328	0.117715	0.114651	0.272798	0.00379297	0.0106194	1.27035e-12	protein_coding	-	ENSG00000119669
IRX3	16	54318409-54319525	-0.00267332	0.00953771	0.744352	0.222364	0.0245746	0.0109298	0.199186	0.542795	0.181793	0.197511	-0.00910841	0.168906	3.94202e-06	0.00640058	1.52934e-14	0.52505	protein_coding	-	ENSG00000177508
IRX3	16	54319696-54320675	-0.0100425	0.00608855	0.251691	0.484246	0.00691961	0.00314885	0.733944	0.874122	0.197039	0.193301	0.048362	0.135799	6.19822e-06	0.0396378	1.03866e-08	0.397709	protein_coding	-	ENSG00000177508
ISOC1	5	128448548-128449721	-0.042326	-0.00685835	3.93986e-07	0.439514	0.0392873	-0.02683	0.0430982	0.191626	0.098645	0.0138556	0.0410499	0.139514	0.164878	0.0457003	0.393852	0.431949	protein_coding	+	ENSG00000066583
ITGA7	12	56088562-56089421	0.045194	-0.011788	2.9159e-07	0.222217	-0.0391991	0.0083453	0.0543706	0.705742	0.0675316	0.0909394	0.176254	0.216306	0.137291	3.54374e-05	0.0146712	8.25196e-16	protein_coding	-	ENSG00000135424
ITGA7	12	56090683-56090852	0.0385871	0.00119832	3.06554e-06	0.903426	-0.0198387	0.0169038	0.296715	0.459081	-0.00673261	0.000459913	0.206872	0.149888	0.991481	0.000258925	0	0	protein_coding	-	ENSG00000135424
ITGA7	12	56091000-56091061	0.0401724	-0.00764727	1.62421e-06	0.421837	-0.0196475	0.00270701	0.304601	0.901204	0.0265758	0.0228806	0.184323	0.117511	0.797234	0.0012551	0.040336	0.290878	protein_coding	-	ENSG00000135424
ITGA7	12	56091235-56091330	0.0402546	-0.00558606	4.10802e-06	0.53706	-0.0302604	0.00152322	0.131202	0.941035	0.0480653	0.0542164	0.204289	0.157971	0.417917	2.71577e-05	0.104538	2.97624e-10	protein_coding	-	ENSG00000135424
ITGA7	12	56091479-56091606	0.0314899	0.00128816	0.000197364	0.886388	-0.0142279	0.0226846	0.465273	0.269104	-0.00557426	0.0578126	0.250106	0.159879	0.6018	7.93674e-07	0.11751	0	protein_coding	-	ENSG00000135424
ITGA7	12	56091722-56091946	0.0319416	-0.00234732	0.000137	0.79577	-0.0352199	0.0117146	0.0678833	0.572006	-0.0402761	0.047268	0.229635	0.198388	0.539768	8.33118e-07	0.111328	5.51485e-10	protein_coding	-	ENSG00000135424
ITGA7	12	56092167-56092360	0.0330733	-0.00633746	7.60295e-05	0.475833	-0.0367867	0.00339889	0.0553002	0.866757	0.0179668	-0.0042238	0.204664	0.195212	0.93922	3.0511e-06	0.414598	0.256729	protein_coding	-	ENSG00000135424
ITGA7	12	56093654-56094177	0.0464842	-0.0103401	1.92558e-08	0.253366	-0.0475221	-0.0132347	0.0123869	0.522818	0.11077	0.00476901	0.198531	0.164982	0.0985436	3.3659e-05	0.0633241	0.216933	protein_coding	-	ENSG00000135424
ITGA7	12	56096612-56096962	0.0419277	-0.000624631	3.46538e-06	0.941982	-0.0169943	0.0183395	0.411854	0.348856	0.0603104	0.0152042	0.178366	0.09245	0.539683	0.000775196	0.0496978	0.0597401	protein_coding	-	ENSG00000135424
ITGA8	10	15555948-15559243	-0.0100928	-0.0080165	0.281429	0.360178	0.0125111	0.0235266	0.567815	0.244349	-0.0790885	0.074148	0.109382	0.273117	0.227289	3.27738e-06	0.323602	0.522236	protein_coding	-	ENSG00000077943
ITPKC	19	41223008-41224195	0.0489838	0.0124102	3.86918e-08	0.146792	-0.0595944	0.0130123	0.00348905	0.504613	0.132215	-0.0343308	0.0428911	-0.0790144	0.0508307	0.306073	2.16581e-08	0	protein_coding	+	ENSG00000086544
ITPKC	19	41235107-41235320	0.0414516	0.017087	5.92351e-06	0.0499166	-0.0524329	0.0146376	0.0121995	0.460943	0.0645086	-0.0489223	0.0293618	-0.0822841	0.397089	0.339352	0	6.66347e-11	protein_coding	+	ENSG00000086544
ITPKC	19	41242891-41242992	0.0441329	0.0170679	1.51416e-07	0.0242018	-0.0338986	-0.0157883	0.0748729	0.359633	0.0546677	0.00726066	-0.0715042	0.0641704	0.560719	0.161857	0.129183	0	protein_coding	+	ENSG00000086544
JDP2	14	75935993-75940814	0.0193426	0.0297158	0.0196058	0.000893908	-0.0357227	-0.0987886	0.0661377	1.83397e-06	-0.00933379	-0.0158998	-0.0225096	-0.0462971	0.944131	0.673821	0.154513	0.172635	protein_coding	+	ENSG00000140044
KANSL3	2	97267853-97268075	-0.00535897	0.0010571	0.546583	0.892777	-0.0147132	0.00753389	0.473053	0.673266	0.0813456	-0.0666562	0.227404	0.0670483	0.200218	8.08961e-06	0.0864379	0.083568	protein_coding	-	ENSG00000114982
KCNC4	1	110753965-110754799	0.038465	0.0169219	5.27036e-06	0.0410234	-0.00559582	0.00321919	0.770607	0.864902	0.109896	-0.0604597	0.0769203	0.105087	0.0686021	0.0472801	0.0790869	0.417864	protein_coding	+	ENSG00000116396
KCNMB1	5	169805168-169805977	-0.015317	0.0109103	0.0993987	0.226487	0.0101998	0.0244134	0.633835	0.241017	-0.0349076	-0.0817533	0.101673	0.278371	0.341351	6.05737e-06	0.160107	0	protein_coding	-	ENSG00000145936
KCNMB1	5	169809656-169810854	NA	0.00578273	NA	0.517908	NA	0.0152759	NA	0.459013	NA	NA	0.194773	0.30101	NA	9.26125e-09	NA	0	protein_coding	-	ENSG00000145936
KIAA0319L	1	35900905-35901198	0.00138201	-0.0376745	0.879287	3.69269e-06	0.0186926	0.000492162	0.370456	0.97861	-0.000908988	-0.00144502	0.0649369	0.0966606	0.999581	0.0736324	0	1.60728e-18	protein_coding	-	ENSG00000142687
KIAA0408	6	127761488-127765427	-0.0448345	-0.00839912	4.28347e-07	0.323686	0.0323236	-0.00454132	0.112687	0.817119	-0.0551715	-0.0328148	0.151367	0.138481	0.497015	0.000713673	0.39983	0.0288767	protein_coding	-	ENSG00000189367
KIAA0408	6	127767553-127768885	-0.0415428	-0.00144259	1.84279e-06	0.847843	0.0285289	0.00975913	0.153472	0.571685	-0.00149158	-0.0391048	0.05279	0.0843986	0.796437	0.115556	0.257775	0.0582518	protein_coding	-	ENSG00000189367
KIAA1217	10	24833910-24836772	-0.0107611	-0.0138489	0.235011	0.0563537	0.0350259	0.0379585	0.100712	0.0247862	0.0818379	-0.0479282	0.120633	0.223928	0.28861	8.92485e-07	0.446013	7.77841e-11	protein_coding	+	ENSG00000120549
KIF26B	1	245848707-245852109	NA	0.0338978	NA	1.91979e-06	NA	0.0129622	NA	0.417727	NA	NA	0.041128	-0.0237844	NA	0.586115	NA	1.95556e-12	protein_coding	+	ENSG00000162849
KLC2	11	66033564-66033688	-0.00592357	0.0161947	0.480149	0.0728286	-0.00289071	0.00536193	0.880537	0.796733	0.245138	0.124055	0.0700737	0.06622	9.97606e-07	0.245596	0.208227	0.414523	protein_coding	+	ENSG00000174996
KLF10	8	103661007-103662619	0.0445764	-0.00504358	1.97144e-07	0.569509	-0.0620963	-0.0168768	0.00167191	0.410319	0.0123571	-0.0573813	0.0104424	0.0335473	0.598769	0.836261	0.234265	1.9962e-09	protein_coding	-	ENSG00000155090
KLF10	8	103663377-103664289	0.0457979	-0.000963153	1.10504e-07	0.909514	-0.0528462	0.00821087	0.00812745	0.672214	0.0611464	-0.11213	0.041114	-0.0637444	0.0973846	0.425671	0.152532	4.82075e-12	protein_coding	-	ENSG00000155090
KLF10	8	103664392-103664625	0.0432303	-0.00199501	5.74024e-07	0.79664	-0.0369787	0.0175944	0.0631078	0.32247	0.0496978	-0.0698774	0.0438728	-0.0977762	0.340968	0.132427	0.0261004	1.53764e-19	protein_coding	-	ENSG00000155090
KLF10	8	103667794-103668130	0.0409564	0.00370636	2.81546e-06	0.630672	-0.0407798	0.0195098	0.0418862	0.268244	-0.0260578	-0.100528	0.057891	-0.0753256	0.206744	0.190817	1.57196e-11	0.0921259	protein_coding	-	ENSG00000155090
KLF11	2	10186277-10186546	0.0415323	0.00289733	1.62547e-06	0.665033	-0.032944	0.000157692	0.0979568	0.991747	-0.0423419	-0.100423	0.0363568	-0.0906687	0.166205	0.0998536	0.108707	0	protein_coding	+	ENSG00000172059
KLF11	2	10187777-10188722	0.0475603	0.0107706	7.62301e-08	0.112245	-0.0502497	0.0103635	0.0129882	0.502981	-0.0445775	-0.100926	0.0437999	-0.0796066	0.172106	0.143757	0.0139657	0	protein_coding	+	ENSG00000172059
KLF11	2	10192354-10194963	0.0571129	0.0106252	4.16687e-11	0.189393	-0.0877306	-0.0152102	1.13824e-05	0.416169	-0.0781404	-0.0829946	-0.000262176	-1.93043e-06	0.108265	0.999987	3.79866e-13	4.54535e-09	protein_coding	+	ENSG00000172059
KLF13	15	31664213-31670102	0.0475925	0.0233376	8.62176e-08	0.00811969	-0.0994055	-0.00936033	1.45988e-06	0.642159	0.0013717	-0.00216369	0.0291076	-0.201017	0.999068	0.00358516	0.286083	0	protein_coding	+	ENSG00000169926
KLF15	3	126070684-126071790	0.0375688	0.0259282	7.75102e-06	0.00359748	-0.0583288	-0.0644471	0.00285156	0.00168403	0.11949	0.150942	0.0672287	-0.00536264	0.00183047	0.486266	0.333487	0.0964956	protein_coding	-	ENSG00000163884
KLF9	9	72999503-73002921	0.0620044	0.0291154	2.05613e-13	3.67395e-05	-0.127079	-0.0957348	1.42275e-10	7.47176e-09	-0.11126	-0.0763933	-0.0523503	-0.0450528	0.0361445	0.290236	0.0680131	0.0508834	protein_coding	-	ENSG00000119138
KLF9	9	73027775-73029540	0.0600272	0.038747	1.50511e-11	1.24714e-07	-0.101543	-0.0717409	8.24754e-07	2.0363e-05	-0.0806802	-0.0695867	-0.0822924	-0.108399	0.168657	0.0124548	2.45942e-17	0.158482	protein_coding	-	ENSG00000119138
KLHL13	X	117031776-117033358	-0.0539962	-0.00702879	4.33143e-09	0.412457	0.040682	0.0161063	0.0512161	0.411811	-0.0957138	-0.000135221	0.119993	0.169049	0.234839	0.00071333	0.228058	0.107962	protein_coding	-	ENSG00000003096
KLHL21	1	6650784-6655617	0.0669334	0.0334929	3.9968e-15	0.000170271	-0.0966436	0.000864209	7.75588e-07	0.965998	-0.0332975	0.0378244	0.121898	0.096776	0.667894	0.0181279	0.471675	5.66123e-12	protein_coding	-	ENSG00000162413
KLHL21	1	6659107-6659512	0.053551	0.0218542	2.17403e-10	0.00681759	-0.0518463	0.0217242	0.00657753	0.236205	0.0483997	-0.063647	0.113483	0.011053	0.354398	0.0724655	1.09419e-10	4.84877e-14	protein_coding	-	ENSG00000162413
KLHL21	1	6661857-6663061	0.0399411	0.0189517	4.49518e-07	0.020848	-0.0402962	0.00841996	0.0250395	0.652799	0.0352922	-0.0025888	0.110313	-0.0132422	0.767263	0.0973661	1.17487e-11	0.0808126	protein_coding	-	ENSG00000162413
KLHL25	15	86311248-86313051	0.0394156	-3.21959e-05	4.93103e-06	0.997055	-0.0238463	0.0470329	0.225773	0.018784	0.14414	0.0421077	0.0763418	0.0993604	0.0198098	0.0748127	0.17377	0.130735	protein_coding	-	ENSG00000183655
KLHL26	19	18778474-18781302	0.0551258	0.0214997	1.28564e-13	0.00474657	-0.060964	-0.00352791	0.000275064	0.838657	0.0275132	0.124598	0.0643185	0.0593028	0.0307006	0.182886	0	0	protein_coding	+	ENSG00000167487
KPNA2	17	66033226-66033323	-0.049151	-0.00494873	2.16803e-08	0.591979	0.00165649	0.00437198	0.933092	0.83598	0.117299	-0.0811468	0.160945	-0.0259509	0.040883	0.0220498	2.49321e-13	0.0299356	protein_coding	+	ENSG00000182481
KPNA2	17	66039216-66039479	-0.0412157	-0.00510721	2.76943e-06	0.583087	0.0159598	0.0124003	0.427393	0.559101	0.0504144	-0.0512156	0.121232	0.0180951	0.467489	0.101943	8.69591e-10	1.80167e-11	protein_coding	+	ENSG00000182481
KPNA2	17	66039954-66040187	-0.0393796	-0.0163864	7.21267e-06	0.0871309	0.0214522	0.010669	0.283756	0.62483	0.0996108	0.00384492	0.16745	0.0435837	0.182672	0.0133239	0.0701571	0.133261	protein_coding	+	ENSG00000182481
KPNA2	17	66040437-66040619	-0.0423968	-0.0100692	5.11161e-07	0.283443	0.0206766	0.00632806	0.27953	0.767949	0.050045	0.0526987	0.0951756	0.0319958	0.375839	0.22043	0.118141	0.260559	protein_coding	+	ENSG00000182481
KPNA6	1	32636308-32642169	-0.0051351	-0.00410483	0.533388	0.600513	0.0156556	0.0333344	0.40972	0.0632624	0.0950713	-0.0548137	0.225834	0.0744724	0.123343	8.84562e-06	0.155815	6.19012e-09	protein_coding	+	ENSG00000025800
KRBA2	17	8271955-8273704	-0.0292415	-0.0153798	5.18057e-05	0.0142615	0.0800838	0.0304114	2.7081e-06	0.0337228	0.0392546	0.0314239	0.0525325	0.0373147	0.557171	0.246969	0.0304657	0.514064	protein_coding	-	ENSG00000184619
LANCL3	X	37534907-37543716	-0.0153746	-0.0349569	0.0782818	8.81385e-06	-0.0103361	0.0155739	0.605337	0.387605	-0.00258973	-0.0613198	0.00575682	0.0191489	0.572987	0.926524	0.237416	0.11986	protein_coding	+	ENSG00000147036
LBR	1	225589204-225591165	-0.0418709	-0.0207207	3.18377e-07	0.00574448	0.0854038	-0.00917151	7.58509e-06	0.5937	0.0998823	-0.0137925	0.112002	0.0444932	0.149754	0.0355323	0.0160167	0	protein_coding	-	ENSG00000143815
LCMT2	15	43619974-43622803	-0.0202775	-0.0110292	0.0214398	0.225881	0.0397912	0.0101958	0.0533098	0.625758	0.232964	0.180444	0.11019	0.0826794	1.51356e-06	0.0530278	0.143332	0.280463	protein_coding	-	ENSG00000168806
LEMD2	6	33744915-33745016	0.00255562	-0.0138207	0.781897	0.110135	-0.00110286	-0.0299698	0.958825	0.128421	0.0820634	-0.0723251	0.21193	0.160831	0.206988	5.8578e-06	1.49952e-09	0	protein_coding	-	ENSG00000161904
LEPR	1	66067075-66067365	0.00418942	0.00615019	0.641722	0.315275	0.0173026	-0.00288349	0.414745	0.836857	-0.0470061	-0.0703858	-0.0015026	-0.21006	0.36609	2.77558e-06	0.219981	0.278882	protein_coding	+	ENSG00000116678
LGALS3	14	55606993-55607158	-0.00235273	-0.0161625	0.783502	0.0547264	-0.0442488	0.0264709	0.0267943	0.172008	-0.148673	0.0464939	-0.266818	0.0408643	0.0186912	4.40489e-06	0.422359	0.610771	protein_coding	+	ENSG00000131981
LHX6	9	124964856-124967059	-0.0419982	-0.0128918	5.26176e-06	0.174912	0.0591077	0.0284144	0.00617296	0.192115	0.147202	-0.061076	0.09887	0.0105859	0.0309858	0.244582	0.0505753	0.122682	protein_coding	-	ENSG00000106852
LIFR	5	38475065-38482320	0.04545	0.0131694	2.20237e-08	0.0191531	-0.0848563	-0.0484143	9.41307e-06	0.000186218	-0.0540774	-0.0562929	0.000214074	0.00821065	0.324904	0.976227	0.0804922	0.606268	protein_coding	-	ENSG00000113594
LINC00865	10	91596975-91600618	-0.00483915	0.00702711	0.611955	0.448036	0.0165641	0.0157347	0.461179	0.463398	0.0419962	-0.0629581	0.211486	0.198487	0.516892	6.85273e-06	0.347678	0.198406	lincRNA	+	ENSG00000232229
LMCD1	3	8578869-8579204	0.0471221	0.0121995	5.0941e-07	0.140636	-0.0776476	-0.0140109	0.000383332	0.459255	-0.0292201	-0.112498	0.0715715	0.00669448	0.182485	0.378428	0.0417011	0.183282	protein_coding	+	ENSG00000071282
LMCD1	3	8590254-8590589	0.0428031	0.00986628	2.35188e-06	0.249802	-0.0723628	-0.0262845	0.000611227	0.180666	-0.0380772	-0.113007	0.0105361	0.0602308	0.145863	0.569811	2.27323e-09	0	protein_coding	+	ENSG00000071282
LMCD1	3	8607118-8607333	0.0426523	0.0216839	4.07327e-07	0.0136152	-0.050905	-0.00538077	0.00858782	0.789675	-0.0847907	-0.0896771	0.000513217	0.0510184	0.0708744	0.693935	1.99411e-14	0.258994	protein_coding	+	ENSG00000071282
LMO4	1	87810471-87812788	-0.0387201	-0.0128911	2.19908e-06	0.127751	0.0117692	0.0186445	0.535865	0.338298	-0.00779125	0.0630589	0.004463	0.160172	0.531321	0.0194977	0.375736	0.0681455	protein_coding	+	ENSG00000143013
LNX1	4	54342920-54343148	0.0434266	0.0123043	6.20299e-07	0.18005	-0.03646	0.0329487	0.0663254	0.116474	0.0588297	-0.0708532	0.072318	0.0540634	0.278519	0.281045	0.448204	0.36478	protein_coding	-	ENSG00000072201
LONRF1	8	12579403-12580763	0.0265605	-0.00884812	0.00211956	0.28001	-0.116856	-0.0565959	1.95017e-08	0.00306934	-0.0799747	-0.0906733	-0.0633751	-0.0358255	0.101284	0.369236	0.332566	0	protein_coding	-	ENSG00000154359
LONRF1	8	12583236-12583507	0.0224682	-0.00130941	0.00892864	0.877957	-0.129408	-0.0371703	2.60763e-10	0.0608541	-0.0627316	-0.107681	0.0307989	-0.0971141	0.0836422	0.22936	0.381715	6.49205e-10	protein_coding	-	ENSG00000154359
LONRF1	8	12586410-12586572	0.0255991	-0.00226197	0.00237093	0.785641	-0.100737	-0.0446659	4.10506e-07	0.0204511	-0.0177327	-0.124391	0.00663142	-0.150417	0.0865528	0.0296957	0.235824	0.120509	protein_coding	-	ENSG00000154359
LONRF1	8	12586683-12586896	0.027068	-0.00163596	0.00139732	0.840609	-0.104004	-0.0475921	2.11845e-07	0.0118476	-0.0333326	-0.130772	-0.00116839	-0.152261	0.0602967	0.0241128	0.196709	3.00713e-11	protein_coding	-	ENSG00000154359
LONRF1	8	12589245-12589366	0.0270505	0.00153795	0.00136666	0.849631	-0.105427	-0.036479	1.19849e-07	0.0513082	-0.0957205	-0.0607712	-0.0541013	-0.180268	0.109008	0.00202375	0.0357071	0.231719	protein_coding	-	ENSG00000154359
LONRF1	8	12592795-12593135	0.0144184	-0.000292376	0.104886	0.970069	-0.106108	-0.0345289	4.04709e-07	0.0558482	-0.0700724	-0.0787349	-0.0132368	-0.12109	0.173826	0.0662318	0.160569	0.259939	protein_coding	-	ENSG00000154359
LONRF1	8	12594409-12594649	0.0298942	0.00146549	0.000423548	0.842637	-0.0953124	-0.0282957	1.60135e-06	0.0955169	-0.0536176	-0.0836508	0.00860632	-0.16607	0.191065	0.00440758	0.0986233	6.23186e-15	protein_coding	-	ENSG00000154359
LONRF3	X	118148170-118148319	-0.0466146	NA	1.54499e-07	NA	0.064071	NA	0.00154783	NA	0.0442869	-0.00731791	NA	NA	0.716023	NA	1.89275e-12	NA	protein_coding	+	ENSG00000175556
LONRF3	X	118155276-118156888	-0.0706075	-0.0339505	4.44089e-16	5.03601e-05	0.116316	0.0172357	1.01874e-08	0.366873	0.106935	-0.0307327	0.0678085	-0.135992	0.133519	0.0288357	0.0550846	0.130767	protein_coding	+	ENSG00000175556
LOX	5	121409708-121409864	-0.00109236	-0.0100818	0.902261	0.209474	0.00602318	-0.00969159	0.774954	0.599758	-0.0617561	-0.118289	0.0311463	-0.289179	0.0853048	1.2523e-06	0.457693	1.5043e-10	protein_coding	-	ENSG00000113083
LPCAT4	15	34656395-34656507	-0.0107907	-0.0382014	0.21286	4.65995e-06	-0.0011734	0.0132278	0.953326	0.483467	-0.0103406	0.00158142	0.0444319	-0.0171084	0.981824	0.672576	0.359555	2.11377e-13	protein_coding	-	ENSG00000176454
LPIN3	20	39978695-39979037	0.0396739	-0.00674093	8.7912e-06	0.476158	-0.0213363	0.00907325	0.297019	0.678358	0.1086	-0.024873	0.124958	0.0637421	0.140178	0.0636638	0.169678	0.0862826	protein_coding	+	ENSG00000132793
LPIN3	20	39980700-39980860	0.04123	-0.0137306	5.04097e-06	0.135995	-0.0332282	-0.0141398	0.106001	0.507946	0.127065	-0.0303403	0.0749954	0.0159298	0.0675479	0.420523	0.0422104	0	protein_coding	+	ENSG00000132793
LRFN4	11	66624973-66626564	0.0289977	0.0182407	6.33967e-06	0.0211725	-0.00150202	-0.0467456	0.918514	0.0106531	0.0448984	0.0735689	0.0821995	0.087175	0.118319	0.0583214	6.78999e-09	0.112113	protein_coding	+	ENSG00000173621
LRG1	19	4537227-4538963	-0.0392287	-0.0105405	7.3064e-06	0.263199	0.0407347	0.024595	0.0422346	0.255633	0.085551	-0.0844397	0.0461958	0.0936966	0.111629	0.22436	0.489165	0.263804	protein_coding	-	ENSG00000171236
LRRC4	7	127667124-127670793	-0.0596364	-0.00728182	2.34459e-11	0.406729	0.0927747	0.0565224	6.42605e-06	0.00519482	-0.011406	0.00807282	0.0679486	0.0252775	0.971241	0.406115	0.0597581	0.0721365	protein_coding	-	ENSG00000128594
LSM3	3	14239536-14242619	-0.0111202	-0.00609247	0.187595	0.440981	0.0087301	-0.0225106	0.652722	0.211129	-0.0621879	-0.0329746	-0.243889	0.033984	0.403389	5.91174e-06	0.222773	0.487127	protein_coding	+	ENSG00000170860
LSP1	11	1901907-1902593	0.0018048	0.0121172	0.842211	0.188056	0.033166	-0.0975301	0.113738	6.1646e-06	0.0905539	0.104738	-0.0214606	0.0797824	0.0558187	0.431442	5.20528e-18	0.00714723	protein_coding	+	ENSG00000130592
LYPLAL1	1	219383684-219383989	-0.0471301	-0.0174861	4.44086e-08	0.0379125	0.0328358	-0.0117845	0.0927547	0.546052	-0.143201	-0.0742584	-0.00586475	0.0374251	0.00894829	0.808759	0.367685	2.79167e-09	protein_coding	+	ENSG00000143353
LYPLAL1	1	219384834-219386207	-0.0366463	-0.0232247	8.00374e-06	0.00212413	0.0314493	-0.0227783	0.0933492	0.186134	-0.164621	0.00728636	-0.0619451	-0.0125942	0.00537687	0.400806	0.261914	0	protein_coding	+	ENSG00000143353
LYRM9	17	26209595-26209738	0.00480516	0.00546344	0.579	0.553371	-0.00480704	0.011052	0.809998	0.601294	-0.0207642	-0.0268499	0.201635	0.226698	0.829559	1.93315e-06	4.16827e-17	0.417033	protein_coding	-	ENSG00000232859
LYSMD4	15	100267610-100269936	-0.0445287	-0.0118953	1.7515e-06	0.184292	0.069526	-0.00811306	0.00154712	0.696104	-0.0358903	0.122149	-0.0823523	0.106917	0.148845	0.093785	0.494099	0.119998	protein_coding	-	ENSG00000183060
MAD1L1	7	2265045-2265233	0.0452961	0.0256501	2.70744e-07	0.00463909	-0.0337524	-0.0241527	0.0924181	0.241455	-0.059605	0.0871175	-0.0637972	-0.0647469	0.197621	0.279338	0.397662	0.0689529	protein_coding	-	ENSG00000002822
MAFG	17	79876149-79880933	0.00237001	-0.00353332	0.792325	0.678897	0.0418978	0.0450404	0.0451621	0.0211168	0.196972	0.0388916	0.334194	0.0108391	0.00203349	5.87736e-09	0.227136	0.088639	protein_coding	-	ENSG00000197063
MAN1A1	6	119509570-119509742	0.0127796	0.00340207	0.140546	0.597538	0.00540952	-0.0232333	0.789267	0.115031	-0.00247408	-0.0975213	0.0212744	-0.220133	0.270271	3.71225e-06	0.0507854	0.210714	protein_coding	-	ENSG00000111885
MAP3K6	1	27687196-27687329	0.0371035	0.0106836	9.816e-06	0.233326	-0.0632811	-0.0242769	0.00118156	0.237845	0.0282551	-0.0320614	0.0120543	0.114504	0.750926	0.154949	0	1.73258e-09	protein_coding	-	ENSG00000142733
MAP3K6	1	27688011-27688118	0.0199055	0.00738455	0.0305022	0.428386	-0.0975657	-0.0374212	6.71982e-06	0.083237	0.0349172	0.0349848	0.0446869	0.0664029	0.695305	0.416131	0	0.124265	protein_coding	-	ENSG00000142733
MAPK4	18	48189459-48190874	NA	0.0220394	NA	0.00776806	NA	0.0304298	NA	0.106741	NA	NA	0.197903	0.179789	NA	1.79068e-06	NA	0.012079	protein_coding	+	ENSG00000141639
MAPK4	18	48255528-48258196	0.00450401	0.0182211	0.633171	0.0401549	-0.0503633	0.00887966	0.0223673	0.660614	0.0757733	0.0517209	0.18508	0.211163	0.296865	3.71654e-06	0.404448	0	protein_coding	+	ENSG00000141639
MARK2	11	63676349-63678491	-0.0233683	-0.00201978	0.00204145	0.76261	0.0398674	0.0402502	0.0230377	0.00933315	0.214514	0.128946	0.0418243	0.139386	1.2003e-06	0.00447256	0.325839	0.0207875	protein_coding	+	ENSG00000072518
MAST2	1	46489444-46490036	0.0160773	0.0136098	0.0833392	0.134003	-0.0174501	-0.00269614	0.414695	0.896534	-0.00517782	-0.0754632	0.267822	0.0779281	0.478838	4.81294e-06	0.182379	0.279741	protein_coding	+	ENSG00000086015
MAST3	19	18242719-18242857	0.0379409	-0.00742343	8.9252e-06	0.422189	0.00328529	0.0477601	0.865952	0.0243477	0.0946688	-0.093466	-0.000218209	-0.0909253	0.0603873	0.345108	0.00619696	0.181612	protein_coding	+	ENSG00000099308
MAST3	19	18245389-18245521	0.0397138	-0.00818069	8.11161e-06	0.393473	-0.021142	0.0234882	0.29575	0.285197	0.0296283	0.0815224	0.100217	-0.0478033	0.323296	0.204535	0	0.166759	protein_coding	+	ENSG00000099308
MAST3	19	18249825-18249934	0.049724	-0.00117059	2.96852e-08	0.898011	-0.0199717	0.0260745	0.323942	0.210355	0.120456	0.0405676	0.0854669	-0.0703032	0.0605599	0.190563	0	0	protein_coding	+	ENSG00000099308
MAST3	19	18252692-18252825	0.0403943	-0.0251763	8.64395e-06	0.00721989	0.000440938	0.0176501	0.983056	0.406896	0.0909459	-0.00315654	0.0758428	-0.0134199	0.272414	0.427558	0.152824	0.116024	protein_coding	+	ENSG00000099308
MAST3	19	18254573-18254817	0.038923	-0.0170943	2.02384e-06	0.0660658	-0.0211083	0.044435	0.256999	0.0375376	0.0684267	0.031175	0.141744	-0.0545171	0.326611	0.0428077	0.179492	0	protein_coding	+	ENSG00000099308
MAST3	19	18255276-18255503	0.0440189	-0.00624336	4.99035e-09	0.460083	0.00393526	0.0256746	0.817338	0.185918	0.0363756	-0.0142624	0.111116	0.00320051	0.711179	0.11353	0.141357	0.175147	protein_coding	+	ENSG00000099308
MAST3	19	18256553-18256675	0.0377733	-0.0252727	9.88089e-06	0.00793537	-0.0174767	-0.0118438	0.373401	0.58549	0.0278484	-0.0242242	0.0612558	-0.0880957	0.803825	0.251581	0.375721	0	protein_coding	+	ENSG00000099308
MAST3	19	18260001-18262499	0.0403069	-0.0164741	4.51422e-06	0.0201227	-0.0366054	0.0206397	0.0799072	0.202043	0.0659943	0.0214397	0.0459643	0.0381159	0.46803	0.396597	0.148968	0	protein_coding	+	ENSG00000099308
MBD5	2	149225910-149228030	0.0361712	0.0161334	6.77358e-06	0.00779938	-0.0176147	-0.00620701	0.33631	0.652967	0.0349569	-0.0390612	0.103975	-0.0548225	0.618268	0.0119272	9.50572e-15	0.0951916	protein_coding	+	ENSG00000204406
MBD5	2	149240679-149241704	0.0407507	0.0151113	1.76235e-06	0.028114	0.00820332	-0.00643798	0.672087	0.681129	-0.0314042	-0.0970886	0.059394	0.0686354	0.186722	0.105352	9.51278e-15	0.253813	protein_coding	+	ENSG00000204406
MBD5	2	149242685-149243519	0.0418945	0.0072378	6.01773e-06	0.339903	-0.0028031	-0.0198334	0.89378	0.251194	-0.0545967	0.0997421	0.0476357	0.0483246	0.190176	0.361326	2.14585e-08	0.186769	protein_coding	+	ENSG00000204406
MBD5	2	149246955-149248163	0.0398624	0.0261242	7.16065e-06	0.000393099	-0.0847325	-0.0215949	3.66778e-05	0.19895	-0.022316	0.00260562	0.0955775	0.107702	0.920005	0.00747807	0.0135025	0.495254	protein_coding	+	ENSG00000204406
MBD5	2	149270439-149275805	0.0613778	0.0235815	1.68532e-12	0.00214355	-0.0480316	-0.0319094	0.0137694	0.0691291	-0.123662	0.00387544	0.0152398	0.0385363	0.061951	0.705957	0	0.190413	protein_coding	+	ENSG00000204406
MCAM	11	119180697-119180954	0.00469199	-0.00190388	0.610663	0.833721	-0.0324767	-0.00384924	0.131477	0.853676	0.0447392	-0.0332363	0.189869	0.234357	0.664622	1.57253e-06	0.0846864	0	protein_coding	-	ENSG00000076706
MCF2L	13	113741549-113741770	0.0413283	0.0143275	6.55808e-06	0.110971	-0.062787	-0.00457483	0.00314908	0.8229	0.0847535	-0.0293352	0.0846701	0.110765	0.301539	0.0496466	0.655217	9.97159e-10	protein_coding	+	ENSG00000126217
MCF2L2	3	182989808-182990852	-0.0357263	-0.0117714	3.37972e-05	0.13518	0.0965114	-0.0105599	1.19896e-06	0.562469	0.0779553	-0.124886	0.057771	-0.000181129	0.0405926	0.514574	0.137583	1.94501e-13	protein_coding	-	ENSG00000053524
MCOLN3	1	85490224-85491967	0.00576375	-0.00331227	0.463558	0.608684	0.0277679	-0.0249603	0.131255	0.092517	0.0664925	0.0420514	0.0618754	-0.229415	0.296437	6.79218e-07	0.103953	0.73187	protein_coding	-	ENSG00000055732
MCU	10	74645503-74647452	-0.0367634	-0.0154401	6.05867e-06	0.0428838	0.0427836	-0.00789189	0.0226319	0.651672	0.0662549	-0.0710854	-0.0288787	0.00986038	0.20198	0.82378	0.190354	0.427985	protein_coding	+	ENSG00000156026
MEF2A	15	100138635-100138716	0.0413561	0.0012594	2.29733e-06	0.858082	0.0307688	-0.0103517	0.12093	0.518448	-0.00770909	-0.0871392	0.0189912	-0.0452552	0.317413	0.591323	3.20524e-06	0	protein_coding	+	ENSG00000068305
MEX3B	15	82334119-82338482	-0.00817031	-0.00126522	0.381718	0.887177	0.058655	-0.00589736	0.00787669	0.773137	0.0495331	-0.118288	0.263821	0.0907032	0.149655	3.85862e-06	0.0189539	0.482842	protein_coding	-	ENSG00000183496
MFSD2A	1	40432758-40432841	NA	0.0141092	NA	0.0851772	NA	-0.0891491	NA	2.83344e-06	NA	NA	-0.116783	0.0922852	NA	0.0257112	NA	2.65375e-12	protein_coding	+	ENSG00000168389
MFSD2A	1	40434241-40434417	NA	0.00749732	NA	0.37441	NA	-0.0878394	NA	7.48328e-06	NA	NA	-0.0529794	0.151528	NA	0.021275	NA	0.200941	protein_coding	+	ENSG00000168389
MGAT2	14	50087489-50090198	-0.0490673	-0.0175769	5.02194e-08	0.0339877	0.0673829	1.92155e-06	0.00149134	0.999919	0.0805712	-0.0138407	0.0846407	0.0129947	0.376093	0.248878	0.074645	0.133805	protein_coding	+	ENSG00000168282
MID1	X	10413350-10417756	-0.0474282	-0.00802726	9.10426e-09	0.252876	0.0499749	-0.00944947	0.00940086	0.55795	-0.0388023	-0.117573	0.0569948	0.112055	0.0787686	0.0214268	0.0905478	0.160021	protein_coding	-	ENSG00000101871
MIR143HG	5	148803653-148805957	0.032726	-0.00426746	3.29655e-06	0.553132	-0.0104341	-0.00196108	0.517917	0.905359	0.0224574	0.000478545	0.0880325	0.173913	0.876828	0.000180826	0	0.257319	lincRNA	+	ENSG00000249669
MMRN1	4	90815875-90816745	NA	-0.0146454	NA	0.0341783	NA	-0.00786278	NA	0.619425	NA	NA	-0.0279835	-0.262089	NA	1.67758e-07	NA	0.377059	protein_coding	+	ENSG00000138722
MMRN2	10	88728799-88729238	0.0479413	0.00789035	9.78273e-08	0.355501	-0.0854907	-0.082997	3.89064e-05	3.0277e-05	0.00708051	-0.0359661	-0.00924291	0.0385434	0.833875	0.797656	0.0301305	0.0318273	protein_coding	-	ENSG00000173269
MNT	17	2287354-2290943	0.0514113	0.0419202	9.37709e-10	2.21591e-06	-0.0655132	-0.0481692	0.00070831	0.0175787	-0.0140708	-0.00460206	0.0398876	0.0759706	0.960061	0.318625	0.442269	0.217595	protein_coding	-	ENSG00000070444
MNT	17	2291151-2291343	0.0389748	0.0182011	7.53544e-07	0.019671	0.00132484	-0.0217638	0.941105	0.22109	0.00486267	0.0899341	0.0475868	-0.010124	0.23232	0.618869	0.441429	0.13761	protein_coding	-	ENSG00000070444
MNT	17	2297337-2297448	0.0434283	0.0262899	4.76907e-07	0.00381184	-0.00410427	0.0171144	0.83359	0.408312	-0.066134	-0.0357333	0.0842802	0.0767347	0.358392	0.129705	3.42812e-11	0.185337	protein_coding	-	ENSG00000070444
MOB3C	1	47078576-47082137	0.00762768	0.00434505	0.353879	0.623287	0.0564739	0.0128901	0.00338522	0.524225	0.0836896	0.061143	0.272373	0.101367	0.144121	7.90517e-07	0.2446	0.27419	protein_coding	-	ENSG00000142961
MPZL2	11	118124118-118125948	-0.0459132	-0.0226991	1.9739e-07	0.00423284	0.0537526	0.00657206	0.00821709	0.719883	-0.0129713	-0.0701846	0.0635799	0.0914296	0.47694	0.0928146	0.298758	0.0204572	protein_coding	-	ENSG00000149573
MRPL40	22	19423161-19423598	-0.0105678	-0.000388426	0.185227	0.962042	0.0103273	-0.022862	0.571997	0.21911	-0.0879934	0.129674	-0.251393	0.0548356	0.0144741	5.54532e-06	0.0145576	0.430033	protein_coding	+	ENSG00000185608
MT1X	16	56717870-56718108	0.0185597	0.0277628	0.0451393	0.0040199	-0.0860096	-0.088688	9.32976e-05	9.21095e-05	-0.0734335	-0.0010124	-0.2882	-0.0717654	0.464534	9.77449e-06	6.36591e-13	0.563917	protein_coding	+	ENSG00000187193
MTUS1	8	17501304-17503648	0.0460065	-0.000955339	1.18922e-07	0.896181	-0.110769	-0.0260121	8.38473e-08	0.124947	-0.013365	-0.0162896	0.0355149	0.141121	0.933534	0.0117276	0.190366	0.0361722	protein_coding	-	ENSG00000129422
MTUS1	8	17554766-17555179	0.047986	0.0160688	3.75586e-08	0.0196017	-0.0724475	-0.0243403	0.000339966	0.12181	-0.0111812	-0.083932	0.0391292	-0.109354	0.354456	0.0466594	7.66957e-10	0.0385296	protein_coding	-	ENSG00000129422
MYADM	19	54376782-54379691	-0.00845964	0.0120988	0.320561	0.151346	0.00519165	-0.0240674	0.792159	0.2157	0.147297	0.23125	0.0893801	0.0206086	7.51423e-06	0.224309	0.301954	0.216859	protein_coding	+	ENSG00000179820
MYC	8	128752642-128753674	-0.0432524	-0.0339963	8.01343e-07	0.000335509	0.032983	-0.00381779	0.100034	0.859631	0.115375	-0.134183	-0.0312375	0.0676443	0.010539	0.51057	0.309616	0.280996	protein_coding	+	ENSG00000136997
MYH3	17	10541360-10541749	-0.00446344	-0.00663519	0.623373	0.447044	0.0195087	0.00334436	0.351934	0.866603	0.0857406	0.0983372	0.18629	0.196534	0.0744253	5.86585e-06	1.0642e-08	0.0398581	protein_coding	-	ENSG00000109063
MYLK	3	123328896-123333196	-0.013785	0.000648884	0.101735	0.936274	-0.0098453	0.00926329	0.618444	0.619484	-0.0479827	-0.175229	0.164268	0.245671	0.00611143	1.61174e-07	0.395028	0.053396	protein_coding	-	ENSG00000065534
MYLK	3	123335199-123337617	-0.00325326	0.00155526	0.714774	0.833008	-0.00659231	0.0179743	0.750639	0.287	-0.027271	-0.151248	0.178441	0.161083	0.0414573	1.74499e-06	3.94594e-15	0.361911	protein_coding	-	ENSG00000065534
MYLK	3	123339054-123344163	-0.000628506	0.00528261	0.943668	0.487417	0.021364	0.0240451	0.304221	0.167999	-0.03616	-0.106226	0.190236	0.174722	0.176708	6.10837e-07	0	0.227386	protein_coding	-	ENSG00000065534
MYLK4	6	2663863-2668133	-0.0415601	-0.0274901	5.73501e-06	0.00197208	0.0236629	0.0164748	0.26428	0.422079	-0.0225041	-0.100111	0.111427	0.0325853	0.2464	0.112756	0.268752	0.499671	protein_coding	-	ENSG00000145949
NABP1	2	192550325-192553251	-0.0389239	-0.0053872	5.11023e-06	0.529341	0.0393379	-0.0375003	0.0467237	0.0595544	0.0597016	-0.0796992	0.0891333	-0.0422004	0.230593	0.222608	0.318863	3.30459e-09	protein_coding	+	ENSG00000173559
NACC2	9	138898383-138903870	-0.000882851	0.00514086	0.922197	0.503692	0.0325542	0.0375749	0.120115	0.0329291	0.08474	0.0569221	0.221687	0.0738476	0.188763	6.03436e-06	0.0937459	4.17028e-09	protein_coding	-	ENSG00000148411
NADK	1	1682671-1684499	0.0149259	-0.00133029	0.0726532	0.867533	-0.0202959	0.000401841	0.295908	0.982496	-0.00780675	0.0350379	0.188056	0.195118	0.823186	6.57947e-07	0.00396966	0.0996594	protein_coding	-	ENSG00000008130
NARF	17	80426640-80426772	-0.00559521	-0.038846	0.525438	2.7153e-06	-0.00363766	0.00397266	0.856858	0.831285	-0.0871115	-0.011458	0.0601049	0.0480669	0.299621	0.312647	0.00843949	0.183579	protein_coding	+	ENSG00000141562
NARF	17	80430440-80430574	-0.00959609	-0.0413558	0.287246	1.58109e-06	0.00457971	-0.0176787	0.824985	0.362375	0.0243985	-0.0545778	0.119977	0.018814	0.620671	0.0704004	9.53612e-11	0.0355005	protein_coding	+	ENSG00000141562
NASP	1	46074972-46078920	0.0140025	-0.00649772	0.0991413	0.380123	0.00115666	-0.0250193	0.953388	0.141937	0.140722	0.00443338	0.217766	0.104	0.0321119	1.29512e-06	3.37128e-10	0.577632	protein_coding	+	ENSG00000132780
NAV3	12	78604178-78606790	0.033426	0.0195722	0.000161286	0.0169846	-0.0656558	-0.10032	0.00166496	1.90536e-07	-0.0475463	-0.133576	-0.0211462	-0.0680216	0.0575651	0.428837	0.434327	0.347841	protein_coding	+	ENSG00000067798
NCOA3	20	46282150-46285621	0.0368116	-0.0156541	3.1341e-06	0.0278026	-0.0603136	-0.00446395	0.00100501	0.785874	0.0149398	-0.12797	0.0763318	-0.020752	0.0583901	0.23533	0.128428	0.179531	protein_coding	+	ENSG00000124151
NDEL1	17	8370248-8371495	-0.0458378	-0.0169296	1.98024e-08	0.0204833	0.0660159	-0.0168188	0.000528987	0.317773	0.0398125	-0.0783194	0.0421458	0.130909	0.293196	0.0177205	1.00814e-10	0	protein_coding	+	ENSG00000166579
NDFIP2	13	80126651-80130210	-0.0416171	-0.0113265	2.19811e-07	0.15872	0.0116456	-0.0324794	0.529633	0.0829209	0.0307789	-0.0127879	-0.0210967	-0.0234179	0.812451	0.830475	0.0484221	4.03703e-17	protein_coding	+	ENSG00000102471
NDUFB6	9	32558908-32558952	-0.00623366	-0.00952764	0.471112	0.290528	-0.00170723	-0.00987514	0.931868	0.631301	-0.29153	0.0325362	0.0802682	-0.0274392	7.68252e-07	0.340784	0.00105524	0.0528448	protein_coding	-	ENSG00000165264
NDUFV3	21	44328974-44329783	-0.0319613	-0.0420739	0.000585274	6.31473e-06	-0.0125744	0.0110193	0.569252	0.604667	-0.0289073	0.0106966	0.0240357	0.0534128	0.883204	0.620401	0.295092	0.228541	protein_coding	+	ENSG00000160194
NEK8	17	27067481-27067631	NA	-0.00330093	NA	0.721408	NA	0.00534393	NA	0.799949	NA	NA	0.221767	0.201538	NA	1.80135e-06	NA	5.70667e-09	protein_coding	+	ENSG00000160602
NFASC	1	204985436-204991950	0.0141117	0.0017236	0.134599	0.855161	-0.0242153	0.0253147	0.274933	0.245433	0.147668	-0.020383	0.142263	0.2613	0.0495142	9.53938e-06	0.578831	0.217475	protein_coding	+	ENSG00000163531
NFIC	19	3456548-3456633	0.0439196	0.0122291	3.5277e-07	0.141732	-0.0153245	-0.00990642	0.431389	0.601698	-0.00690736	-0.080551	-0.0216356	-0.00665337	0.364919	0.906311	0	0	protein_coding	+	ENSG00000141905
NFIL3	9	94171327-94173370	-0.0709197	-0.0513304	4.44089e-16	4.95714e-10	0.114433	0.0527092	2.61822e-08	0.00483744	0.0368824	0.0816387	-0.0605344	-0.120138	0.299714	0.0380529	0.367407	0.0372447	protein_coding	-	ENSG00000165030
NIPAL3	1	24795476-24799466	0.0467541	0.00790715	1.82593e-07	0.313328	-0.0434588	0.0270373	0.0356034	0.13097	0.0398731	-0.0737574	0.120503	0.0999746	0.385837	0.00577677	0.315346	1.47998e-10	protein_coding	+	ENSG00000001461
NLN	5	65118609-65125111	-0.0157384	0.0168026	0.0524708	0.0228893	0.00847317	-0.0760906	0.654186	8.09822e-06	0.0134053	-0.100995	0.0242412	-0.084143	0.187615	0.213955	0.496438	0.455242	protein_coding	+	ENSG00000123213
NOP2	12	6669264-6669959	-0.0424436	-0.00880722	8.4081e-07	0.322299	0.0159983	-0.0333526	0.415303	0.100972	0.128635	0.0948596	-0.0035453	0.164407	0.0123371	0.0234818	9.68119e-11	6.86177e-09	protein_coding	-	ENSG00000111641
NOTCH1	9	139388896-139392010	0.0527079	-0.00731236	6.40321e-10	0.436991	-0.0192018	0.0246976	0.327893	0.258855	0.133036	0.031713	0.0424456	0.0737691	0.0383588	0.382225	0.253956	0.656174	protein_coding	-	ENSG00000148400
NOTCH1	9	139393351-139393448	0.0396731	0.00168675	2.33954e-06	0.837795	-0.0162213	0.0207369	0.401396	0.269922	0.11282	-0.0174219	0.0328496	-0.00710748	0.0964325	0.810791	0.411982	0.393033	protein_coding	-	ENSG00000148400
NOTCH1	9	139393564-139393711	0.042583	-0.00307087	4.19182e-07	0.714727	-0.0117832	0.0054298	0.541424	0.777385	0.139681	0.0214687	0.0883032	-0.038533	0.0267352	0.206828	1.55342e-08	0.364026	protein_coding	-	ENSG00000148400
NOTCH1	9	139395004-139395299	0.0435364	-0.00398939	5.23355e-09	0.600417	0.00156931	0.0153409	0.925611	0.378864	0.0662948	0.00453586	0.0733335	0.00442364	0.340663	0.306091	0.145641	0.45805	protein_coding	-	ENSG00000148400
NOTCH1	9	139396200-139396365	0.0375856	-0.00680582	6.3156e-06	0.41233	-0.0384489	0.0249915	0.0437549	0.188306	0.0390937	0.0497753	0.038074	-0.0191358	0.49237	0.732425	0.326623	0.533383	protein_coding	-	ENSG00000148400
NOTCH1	9	139396453-139396540	0.0390145	-0.00292952	6.13522e-06	0.725664	-0.00704235	0.0235248	0.722549	0.218123	0.0559463	0.0324032	0.0486155	-0.00415694	0.489985	0.644805	0.194083	0.577616	protein_coding	-	ENSG00000148400
NOTCH1	9	139396724-139397227	0.0375682	0.00342281	3.28536e-06	0.681898	-0.00596025	0.0107382	0.745997	0.574905	0.100734	0.0343388	0.0453709	0.00769482	0.0998737	0.671741	0.226157	0.572127	protein_coding	-	ENSG00000148400
NOTCH1	9	139397634-139397782	0.0369095	0.00698546	7.2274e-06	0.379765	-0.000199571	0.0303012	0.991534	0.095496	0.0545314	-0.016712	0.070285	-0.0441165	0.549113	0.286448	9.41765e-14	0.290398	protein_coding	-	ENSG00000148400
NOTCH1	9	139399125-139399556	0.0452667	-0.00133565	1.01258e-08	0.859328	0.00358243	0.01961	0.842205	0.255377	0.107882	0.0409141	0.0562004	-0.0614357	0.0594084	0.256977	0.380663	0.490248	protein_coding	-	ENSG00000148400
NOTCH1	9	139399762-139400333	0.0389872	0.00107336	5.56898e-07	0.885769	0.00124737	0.016594	0.943915	0.330868	0.108111	0.0128372	0.0505435	-0.0911465	0.075765	0.120258	0.119773	0.37727	protein_coding	-	ENSG00000148400
NOTCH1	9	139401168-139401425	0.0390782	-0.00301663	6.61123e-06	0.699263	-0.021875	0.0226993	0.270923	0.203073	0.0621226	0.0794144	0.067025	-0.112217	0.190838	0.0475009	0.171929	0.386138	protein_coding	-	ENSG00000148400
NOTCH1	9	139401757-139401889	0.0375943	-0.00193233	3.92971e-06	0.799729	-0.00610527	0.0308068	0.742449	0.0764455	0.0811315	0.0542795	0.0960827	-0.117375	0.154269	0.0127243	0.244769	0.111114	protein_coding	-	ENSG00000148400
NOTCH1	9	139402684-139402837	0.0399543	-0.00120833	3.005e-07	0.86916	-0.00788235	0.0317282	0.657544	0.0587757	0.0906986	0.0325104	0.00802993	-0.0756797	0.13248	0.304306	0.218296	0.35844	protein_coding	-	ENSG00000148400
NOTCH1	9	139405105-139405257	0.0341199	0.00164344	8.30561e-06	0.815272	0.00161444	0.0317127	0.926619	0.0489702	0.0273265	0.00730739	0.0190312	-0.0707439	0.834791	0.310735	0.286026	0.178586	protein_coding	-	ENSG00000148400
NOTCH1	9	139407844-139407989	0.0373084	0.00270984	7.68445e-06	0.711397	0.000586193	0.0259534	0.975521	0.120594	0.0978141	0.00404882	0.0550006	-0.129765	0.164506	0.0187085	0.357335	0.198814	protein_coding	-	ENSG00000148400
NOTCH1	9	139409742-139409852	0.0369162	-0.00224754	4.67847e-06	0.762974	0.00470544	0.00612707	0.799233	0.719335	0.047217	0.00549509	0.0352478	-0.0378668	0.634294	0.584127	0.270348	0.435626	protein_coding	-	ENSG00000148400
NOTCH1	9	139412204-139412389	0.0368666	0.00560869	5.05496e-06	0.42034	0.0074422	0.0128814	0.686652	0.416175	0.0542555	0.00156067	0.0633063	-0.096312	0.555348	0.0498053	0.206141	0.0469712	protein_coding	-	ENSG00000148400
NOTCH1	9	139412589-139412744	0.0372541	0.0119861	2.30864e-06	0.093484	0.00960115	0.0260901	0.594314	0.109609	0.0369703	0.0209867	0.0440076	-0.133302	0.683427	0.0150821	0.29564	0.422574	protein_coding	-	ENSG00000148400
NOTCH1	9	139413043-139413276	0.0373721	0.00346754	2.62376e-06	0.616125	-0.000566441	0.00681474	0.975271	0.666411	0.115999	0.00991769	0.0427436	-0.11567	0.0634962	0.0329407	0.22971	0.427571	protein_coding	-	ENSG00000148400
NOTCH1	9	139413895-139414017	0.0415157	0.00951906	2.0549e-07	0.200168	-0.0111142	0.00901652	0.542087	0.594621	0.0843774	0.0201752	0.0118388	-0.0948419	0.208447	0.163587	0.237446	0.216439	protein_coding	-	ENSG00000148400
NOTCH1	9	139417080-139417640	0.0347949	0.00701016	4.19376e-06	0.330781	0.00637534	0.0152155	0.71289	0.355801	0.0852263	0.0424026	-0.00282678	-0.0774777	0.126433	0.28079	0.343703	0.464557	protein_coding	-	ENSG00000148400
NPAS2	2	101591265-101591406	NA	-0.0320175	NA	0.000467292	NA	0.0971029	NA	3.72748e-06	NA	NA	0.0419009	0.0995409	NA	0.181435	NA	0.261112	protein_coding	+	ENSG00000170485
NPAS2	2	101598693-101604738	-0.0187536	-0.0340131	0.0436524	2.89298e-05	0.00183864	0.0859823	0.931464	4.01536e-06	0.0527819	0.0186732	0.193052	0.0887854	0.614953	0.000113729	0	0.28991	protein_coding	+	ENSG00000170485
NPAS2	2	101604772-101606908	-0.0283083	-0.0384992	0.00221652	1.98969e-05	0.0154408	0.103241	0.46863	8.33341e-07	0.0137548	0.0421314	0.167966	0.120624	0.762764	0.00120714	0	1.68568e-15	protein_coding	+	ENSG00000170485
NPAS2	2	101609809-101609989	NA	-0.0377965	NA	6.60492e-06	NA	0.106184	NA	3.89719e-08	NA	NA	0.105078	0.1715	NA	0.000881657	0.404561	0.0839758	protein_coding	+	ENSG00000170485
NPAS2	2	101611862-101613291	-0.0228521	-0.0528166	0.0128188	6.43195e-10	0.0164432	0.0917981	0.43821	3.10024e-06	0.0191894	0.035408	0.0634062	0.191299	0.796371	0.00154891	0.426889	0	protein_coding	+	ENSG00000170485
NPR1	1	153658282-153658356	0.0265616	0.00315513	0.000886585	0.73087	0.00541998	0.0107764	0.769839	0.605742	0.199593	0.152649	0.0113149	0.0417811	5.43446e-06	0.768719	0.424239	0.00937869	protein_coding	+	ENSG00000169418
NR1D1	17	38249040-38249535	0.0821341	0.062991	2.2e-16	3.63043e-13	-0.126641	-0.0843959	2.98019e-11	1.73272e-05	-0.0955245	0.000349891	-0.201819	-0.0101012	0.168729	0.000800376	0.273866	0.156642	protein_coding	-	ENSG00000126368
NR1D1	17	38250165-38250375	0.0833798	0.0590819	2.2e-16	4.81704e-12	-0.133565	-0.0912236	1.96887e-12	2.70062e-06	-0.100469	0.000149041	-0.200036	-0.0309771	0.137222	0.000575796	0.0931144	0.225519	protein_coding	-	ENSG00000126368
NR1D1	17	38251188-38251373	0.0852451	0.0592171	2.2e-16	9.93561e-12	-0.137599	-0.100899	5.24025e-13	4.20255e-07	-0.0797646	0.000156462	-0.191427	0.00392891	0.287316	0.00206448	0.246767	7.00505e-13	protein_coding	-	ENSG00000126368
NR1D1	17	38251697-38252340	0.0868825	0.0606161	2.2e-16	3.57936e-12	-0.135588	-0.0921254	1.0143e-12	3.78107e-06	-0.0527636	0.0109039	-0.158723	-0.0446988	0.574936	0.00885267	0.375617	0.153523	protein_coding	-	ENSG00000126368
NR1D1	17	38252696-38252840	0.0902206	0.0555405	2.2e-16	7.46326e-10	-0.130771	-0.0927022	9.92739e-12	7.65662e-06	-0.0528557	0.00188753	-0.171137	-0.0497238	0.582541	0.00595069	0.34308	0.113131	protein_coding	-	ENSG00000126368
NR1D1	17	38252944-38253032	0.0868378	0.0608236	2.2e-16	6.6851e-12	-0.129608	-0.0887052	6.45461e-12	9.77764e-06	-0.0397701	0.0629027	-0.114581	-0.0633877	0.386785	0.05112	0.233877	0.128708	protein_coding	-	ENSG00000126368
NR1D1	17	38253318-38253656	0.0877924	0.0604472	2.2e-16	1.08336e-11	-0.137284	-0.0850102	2.23332e-12	2.68447e-05	-0.0304921	-0.0333428	-0.179504	-0.0534373	0.693789	0.00280814	0.28201	0.0482295	protein_coding	-	ENSG00000126368
NR1D1	17	38256317-38256978	0.0885109	0.0641634	2.2e-16	4.43645e-13	-0.131449	-0.0852691	1.71549e-11	2.32457e-05	-0.0309742	-0.0208546	-0.115629	-0.0595702	0.771277	0.0565931	0.184352	0.0884009	protein_coding	-	ENSG00000126368
NR1D2	3	23996028-23996294	0.0549214	0.0182149	1.15758e-10	0.0023319	-0.0668247	-0.0444333	0.000601559	0.0011106	-0.0461177	-0.0584058	-0.0273211	-0.0925216	0.399344	0.0452084	0	0.340888	protein_coding	+	ENSG00000174738
NR1D2	3	23997528-23997616	0.047584	NA	1.16635e-08	NA	-0.0553171	NA	0.00358016	NA	-0.0484341	-0.0447812	NA	NA	0.448854	NA	5.53344e-18	NA	protein_coding	+	ENSG00000174738
NR1D2	3	24001162-24001415	0.0547462	NA	3.72054e-10	NA	-0.0388535	NA	0.0529995	NA	-0.0414927	-0.0289364	NA	NA	0.655208	NA	0.00702063	NA	protein_coding	+	ENSG00000174738
NR1D2	3	24003468-24004096	0.0596002	0.0283904	1.25322e-12	1.59943e-06	-0.0687739	-0.0471875	0.000403449	0.000442097	-0.0211055	-0.0237731	0.0318628	-0.100313	0.843216	0.0307703	0.0157091	0.288645	protein_coding	+	ENSG00000174738
NR1D2	3	24006255-24006653	0.0580092	0.0286162	3.54206e-12	1.15662e-06	-0.0829459	-0.0356665	1.55369e-05	0.00751929	-0.0474181	-0.0740012	-0.0193602	-0.0930393	0.269104	0.0468156	0.181659	0.553244	protein_coding	+	ENSG00000174738
NR1D2	3	24009304-24009514	0.06366	0.0225864	1.46549e-14	0.000120554	-0.0822114	-0.0542795	1.33602e-05	5.17011e-05	-0.0495879	-0.0877076	0.0127317	-0.0745959	0.171605	0.160026	0.181204	0.518637	protein_coding	+	ENSG00000174738
NR1D2	3	24018714-24021237	0.0751603	0.0370265	2.2e-16	2.07776e-10	-0.108069	-0.0756195	3.89305e-09	1.48453e-08	-0.0346206	-0.0660506	0.0423405	-0.0477625	0.335989	0.248601	0.153516	0.490351	protein_coding	+	ENSG00000174738
NR4A1	12	52447202-52451043	0.00305956	-0.00775217	0.734173	0.410838	-0.0222332	-0.0143163	0.282298	0.508646	0.279736	-0.012875	0.193402	0.125662	4.91459e-06	0.000546535	2.0392e-14	0.381991	protein_coding	+	ENSG00000123358
NT5DC3	12	104166088-104171859	-0.0453994	-0.000475494	2.1556e-07	0.955712	0.0740515	-0.0273257	0.000354842	0.168739	-0.00399831	0.0321173	0.152887	0.184304	0.868606	8.03882e-05	0.230339	0.257783	protein_coding	-	ENSG00000111696
NTRK3	15	88520598-88522694	0.0151244	0.0104009	0.086713	0.273459	-0.045224	-0.0198228	0.0335324	0.364049	-0.0226103	0.155967	0.0921305	0.299069	0.0447351	5.06586e-06	0.395029	2.22508e-12	protein_coding	-	ENSG00000140538
NXPE3	3	101540248-101547073	-0.0186408	-0.00278231	0.0180774	0.651324	0.0837896	0.007871	5.83899e-06	0.576994	0.056772	-0.0624843	0.069717	0.0553146	0.283536	0.066986	0.0306099	0.650125	protein_coding	+	ENSG00000144815
OAT	10	126085872-126086671	-0.0142718	0.00409966	0.0893294	0.586264	0.0112167	-0.0787247	0.56367	6.66282e-06	-0.0642068	-0.0478758	0.002318	0.0543503	0.315215	0.557994	0.491357	0.195093	protein_coding	-	ENSG00000065154
OSBPL10	3	31712289-31712475	-0.0415993	-0.00128804	6.93225e-06	0.881648	0.0254878	0.0200462	0.232072	0.308781	0.0877787	-0.00465145	0.07875	0.012323	0.317846	0.3255	0.0155497	0	protein_coding	-	ENSG00000144645
OSGIN2	8	90936731-90940116	-0.0470615	-0.0125249	1.56356e-07	0.0862606	0.0434613	0.00591946	0.0395503	0.723602	-0.0814019	0.0136309	0.126799	-0.0296799	0.361619	0.0193368	0.469636	0.53914	protein_coding	+	ENSG00000164823
OVGP1	1	111956936-111957966	-0.0291225	-0.0395698	0.000933345	2.32603e-06	0.0296417	-0.00262569	0.147947	0.890468	-0.0178522	0.0317804	0.0114141	0.0964537	0.833163	0.219098	0	0	protein_coding	-	ENSG00000085465
OVGP1	1	111958945-111959301	-0.0205256	-0.0401526	0.0230278	7.1505e-06	0.016381	0.0085923	0.42732	0.672847	0.0784225	0.0364445	0.040228	0.107699	0.294184	0.140282	0.0406002	0.124827	protein_coding	-	ENSG00000085465
OVGP1	1	111969684-111970134	-0.00397783	-0.0373351	0.656884	8.37757e-06	0.0475465	0.0185866	0.0207859	0.326975	0.0811061	-0.0818587	0.0510126	0.0205311	0.150423	0.557293	0.185534	0	protein_coding	-	ENSG00000085465
P4HA1	10	74766975-74768050	-0.0202601	-0.0390241	0.0244867	1.57405e-06	-0.00741899	0.020107	0.720894	0.277059	-0.028234	0.0304411	0.0199422	-0.0515451	0.786579	0.608491	0.394621	0.197686	protein_coding	-	ENSG00000122884
PAFAH1B2	11	117038137-117041761	-0.00385686	-0.00149695	0.645029	0.814875	1.88806e-05	0.0104701	0.999241	0.476053	0.0929646	-0.0888779	0.15678	0.12784	0.0836382	3.86509e-06	0.305604	8.93831e-12	protein_coding	+	ENSG00000168092
PAM	5	102285241-102285321	0.0200086	0.00707064	0.0229746	0.365225	0.0079178	0.00636673	0.697386	0.721272	0.0550158	-0.0859063	0.0690562	-0.256965	0.235056	5.85028e-06	1.18702e-15	0.149443	protein_coding	+	ENSG00000145730
PANK4	1	2441496-2441596	0.00772899	-0.015575	0.369266	0.0805208	-0.00049274	4.60451e-05	0.980068	0.998203	-0.036374	0.109309	0.221967	0.201137	0.144347	9.00982e-07	1.65838e-09	0	protein_coding	-	ENSG00000157881
PC	11	66625354-66625740	0.0331123	0.0199174	6.15611e-06	0.0205943	0.000122644	-0.0257416	0.994161	0.193129	0.037073	0.0963221	0.0666327	0.0266188	0.10509	0.408321	0.192881	5.77268e-10	protein_coding	-	ENSG00000173599
PDK2	17	48172639-48172917	0.0129456	0.0106444	0.117796	0.197226	0.00681306	0.085471	0.725163	7.61417e-06	-0.0328578	0.102252	0.0280387	-0.111245	0.173029	0.130399	0.416729	0.101463	protein_coding	+	ENSG00000005882
PDLIM1	10	97006972-97007377	-0.0339712	-0.00844732	6.85918e-06	0.346266	0.0179317	-0.00764361	0.305323	0.710715	-0.00137952	-0.0442674	-0.0560275	0.0497357	0.692145	0.459659	0.708411	0.324013	protein_coding	-	ENSG00000107438
PDLIM1	10	97023621-97023820	-0.0378163	-0.0152104	5.38649e-07	0.0989304	0.0110597	0.00643027	0.525378	0.762549	-0.0127708	-0.0594484	-0.0157331	-0.0723367	0.483126	0.485339	0.613766	0.269427	protein_coding	-	ENSG00000107438
PDLIM1	10	97028535-97028619	-0.0378209	-0.00904369	2.57559e-06	0.327078	0.0117975	0.0102195	0.526367	0.631587	-0.0174344	-0.141539	0.00242281	-0.0907404	0.0315986	0.353355	0.444959	0.17461	protein_coding	-	ENSG00000107438
PDLIM3	4	186422903-186423637	-0.032658	-0.000169511	0.000727337	0.985486	-0.0175576	0.00842694	0.437109	0.694745	-0.0233916	0.0317678	0.147558	0.303716	0.836908	3.48989e-07	0.557089	0.226247	protein_coding	-	ENSG00000154553
PDLIM3	4	186425629-186425740	-0.0240548	-0.00112774	0.010773	0.896878	-0.0241494	0.0141827	0.272785	0.476516	-0.0781716	0.0198645	0.195913	0.23643	0.417519	3.26878e-07	0.179712	2.69489e-11	protein_coding	-	ENSG00000154553
PDLIM3	4	186427676-186428241	-0.00833184	0.00429649	0.375885	0.641388	-0.012288	0.00243619	0.574669	0.908517	-0.0450942	0.0203806	0.180196	0.270826	0.722469	4.60226e-07	0.500558	1.04678e-18	protein_coding	-	ENSG00000154553
PDLIM3	4	186446174-186446325	-0.0332296	-0.0110712	0.000572956	0.210017	-0.0209255	0.011216	0.346808	0.579248	-0.00543303	0.00917903	0.164259	0.221415	0.986783	8.18969e-06	0.4607	0	protein_coding	-	ENSG00000154553
PDLIM3	4	186456496-186456766	-0.0234715	-0.00941332	0.00959916	0.26858	-0.0168284	0.0152712	0.416444	0.433066	0.000625558	0.0297098	0.140334	0.272619	0.886138	3.02463e-07	0.000825118	1.24512e-08	protein_coding	-	ENSG00000154553
PDLIM7	5	176911071-176911474	-0.0284826	-0.0110964	0.000393553	0.20338	0.01136	0.00518665	0.536428	0.796249	0.0428461	0.0107975	0.0773858	0.27278	0.670107	8.96369e-06	0.231988	1.01465e-12	protein_coding	-	ENSG00000196923
PDLIM7	5	176914898-176915249	-0.0356165	-0.0103925	6.76951e-06	0.249827	-0.00110974	0.0158318	0.950986	0.445171	0.0650806	0.0105115	0.106067	0.291554	0.391791	1.75036e-06	4.54835e-09	0.00258178	protein_coding	-	ENSG00000196923
PDLIM7	5	176916394-176916628	-0.0226938	-0.0107701	0.00382744	0.223427	0.0135553	0.0152692	0.456869	0.452427	0.0328245	0.0225853	0.140701	0.250559	0.724581	4.58337e-06	0.180182	2.55648e-12	protein_coding	-	ENSG00000196923
PDLIM7	5	176916772-176917100	-0.0157083	-0.0152964	0.057132	0.0879025	0.00778513	-0.00379246	0.684342	0.853322	0.0515107	0.0501489	0.15748	0.241274	0.388044	4.81125e-06	0.113912	0.0755103	protein_coding	-	ENSG00000196923
PDLIM7	5	176917871-176917907	-0.000226922	-0.0101627	0.979308	0.264756	0.0451986	-0.0110829	0.0250995	0.593283	0.0661468	0.0301938	0.170243	0.234012	0.405952	4.59428e-06	0	0	protein_coding	-	ENSG00000196923
PDLIM7	5	176918011-176918421	-0.0142322	-0.0119201	0.0790888	0.183525	0.0209676	0.00482786	0.264604	0.81455	0.141748	-0.0224963	0.124647	0.263076	0.0210262	5.37249e-06	0	0	protein_coding	-	ENSG00000196923
PDXDC1	16	15129306-15129410	-0.00799722	6.31214e-05	0.388114	0.994407	-0.0145427	0.00230386	0.49956	0.910656	0.0129302	-0.173785	0.257481	0.110988	0.0244853	3.13415e-06	0.0387185	0.485801	protein_coding	+	ENSG00000179889
PER1	17	8043809-8044658	0.0620665	0.0579615	1.33737e-12	1.92331e-11	-0.134488	-0.151102	7.13629e-11	1.23901e-13	-0.0866631	0.0260847	-0.154032	0.0467914	0.271912	0.0160891	0.103627	0.179384	protein_coding	-	ENSG00000179094
PER1	17	8045123-8045273	0.0668315	0.0568004	1.15463e-14	1.34945e-10	-0.132968	-0.154441	6.50187e-11	1.71418e-13	-0.0625639	0.00942126	-0.117614	0.0617954	0.514409	0.0807852	0.152896	1.93773e-11	protein_coding	-	ENSG00000179094
PER1	17	8045587-8045776	0.0643302	0.0567189	4.05453e-13	1.7115e-10	-0.129256	-0.151205	6.8126e-10	5.68878e-13	-0.0339394	0.016149	-0.108629	0.0629857	0.809363	0.102822	0.143035	1.52911e-13	protein_coding	-	ENSG00000179094
PER1	17	8045967-8046153	0.0643373	0.0553309	2.45137e-13	5.99303e-10	-0.12566	-0.143392	1.37514e-09	1.15397e-11	-0.0479373	0.0199375	-0.117472	0.0495372	0.662503	0.0973587	0.110357	0.0263678	protein_coding	-	ENSG00000179094
PER1	17	8046584-8047194	0.0709171	0.0568794	4.44089e-16	7.42397e-11	-0.122416	-0.145283	2.2002e-09	2.37588e-12	-0.0416839	0.032167	-0.123792	0.0427454	0.659779	0.075917	0.20151	0.0349278	protein_coding	-	ENSG00000179094
PER1	17	8047507-8048311	0.0646448	0.0497817	2.62679e-13	2.10397e-08	-0.0978052	-0.13797	1.72386e-06	6.40985e-11	-0.0487634	0.00879717	-0.128491	0.0350631	0.675063	0.0777513	0.168653	0.151801	protein_coding	-	ENSG00000179094
PER1	17	8049276-8049455	0.0685	0.054618	9.32587e-15	4.76194e-10	-0.116951	-0.146926	1.13518e-08	1.42064e-12	-0.0489518	0.0387535	-0.0963413	0.0435235	0.556742	0.187262	0.237497	0.11185	protein_coding	-	ENSG00000179094
PER1	17	8049690-8049820	0.0741704	0.0553362	2.2e-16	6.23191e-10	-0.119185	-0.150468	3.66496e-09	1.34071e-12	-0.0277907	0.0275769	-0.130618	0.0432832	0.793127	0.064353	0.0607131	0.0389769	protein_coding	-	ENSG00000179094
PER1	17	8049912-8050083	0.0690443	0.0578625	2.22045e-15	1.03336e-10	-0.123672	-0.142414	9.88254e-10	1.70928e-11	-0.058324	0.0289818	-0.0979029	0.0540129	0.505608	0.175724	0.167655	2.58186e-10	protein_coding	-	ENSG00000179094
PER1	17	8050215-8050320	0.0696748	0.0594196	8.88178e-16	2.7383e-11	-0.111514	-0.133252	2.16779e-08	1.95039e-10	-0.0372253	0.0356596	-0.099375	0.0610315	0.660769	0.146443	1.44854e-18	0.0654712	protein_coding	-	ENSG00000179094
PER1	17	8050568-8050699	0.0714726	0.0552718	2.2e-16	3.75593e-10	-0.114408	-0.131544	7.07788e-09	2.42026e-10	-0.0183934	0.0337996	-0.0906145	0.0217588	0.796918	0.26619	0	0.0392773	protein_coding	-	ENSG00000179094
PER1	17	8050788-8050896	0.0690937	0.0505839	1.77636e-15	1.15384e-08	-0.119255	-0.140917	3.67865e-09	2.21869e-11	-0.0237078	0.0335287	-0.0665172	0.0514406	0.780331	0.382018	0.0438896	0.104459	protein_coding	-	ENSG00000179094
PER1	17	8050992-8051145	0.0711735	0.0538841	2.2e-16	1.06067e-09	-0.10664	-0.132329	5.6824e-08	1.869e-10	-0.0256598	0.01002	-0.0828428	-0.0140241	0.878159	0.320241	0.126816	6.15176e-17	protein_coding	-	ENSG00000179094
PER1	17	8051315-8051421	0.0646396	0.056552	9.37028e-14	2.56712e-10	-0.108493	-0.140526	8.46436e-08	2.09091e-11	-0.012286	0.00234717	-0.0871908	-0.0142671	0.974523	0.283392	0.155386	0	protein_coding	-	ENSG00000179094
PER1	17	8051499-8051577	0.0634886	0.0507393	5.72431e-13	1.28311e-08	-0.108332	-0.139162	1.15927e-07	3.63722e-11	-0.0065054	-0.0216531	-0.0619613	-0.00401222	0.924696	0.540566	0.108272	0.00505234	protein_coding	-	ENSG00000179094
PER1	17	8051962-8052104	0.0638392	0.0547308	2.81997e-13	1.16909e-09	-0.114361	-0.14057	1.57146e-08	3.31832e-11	-0.0703268	0.00292815	-0.0823615	-0.0329496	0.426975	0.287571	0.107474	0	protein_coding	-	ENSG00000179094
PER1	17	8052577-8052628	0.0550843	0.0580296	4.30226e-10	8.17137e-11	-0.114572	-0.103626	2.87706e-08	3.70367e-07	-0.0319396	0.016451	-0.069868	-0.05295	0.821015	0.268779	0.0502042	0	protein_coding	-	ENSG00000179094
PER1	17	8052780-8052981	0.0705871	0.0592844	8.88178e-16	1.65947e-11	-0.109738	-0.12847	6.80093e-08	3.17945e-10	-0.0194562	-0.0103585	-0.105794	-0.00187463	0.9191	0.154183	0.0427746	0.116885	protein_coding	-	ENSG00000179094
PER1	17	8053073-8053194	0.070691	0.0584293	4.44089e-16	4.29354e-11	-0.120652	-0.140784	2.81593e-09	1.09286e-11	-0.0247082	0.0180965	-0.120221	-0.0124878	0.86565	0.0907355	0	1.49366e-10	protein_coding	-	ENSG00000179094
PER1	17	8053289-8053443	0.0716488	0.0543233	2.22045e-16	1.15556e-09	-0.116074	-0.132581	1.07383e-08	2.34918e-10	-0.0384825	0.0292848	-0.0651884	-0.0189265	0.700511	0.472429	0.0593391	0	protein_coding	-	ENSG00000179094
PER1	17	8053537-8053635	0.0674892	0.0567588	1.73195e-14	3.80716e-10	-0.124478	-0.126316	1.77929e-09	2.30825e-09	-0.0505967	0.00995024	-0.0713232	0.00598511	0.652626	0.458526	0	9.13385e-09	protein_coding	-	ENSG00000179094
PER1	17	8053750-8054163	0.0717403	0.0543133	2.2e-16	1.36597e-09	-0.117066	-0.130818	4.90159e-09	4.75889e-10	-0.0296469	0.0318326	-0.104531	-0.0043463	0.747845	0.179926	0.0685033	6.62344e-11	protein_coding	-	ENSG00000179094
PER2	2	239152679-239155165	0.0727044	0.0415041	2.2e-16	3.45831e-06	-0.158073	-0.163045	3.9968e-15	1.9984e-14	0.0311902	0.0157246	0.00945064	0.11953	0.798306	0.137107	0.13893	0.170762	protein_coding	-	ENSG00000132326
PER2	2	239157703-239157853	0.0549381	0.0262062	5.15433e-10	0.00133663	-0.0829206	-0.0678668	4.67034e-05	0.000316556	-0.0585639	0.00345938	0.0895921	-0.00998582	0.571274	0.219647	2.6291e-10	0.177134	protein_coding	-	ENSG00000132326
PER2	2	239159192-239159384	0.0511873	0.0334869	1.07665e-08	5.28925e-05	-0.0877888	-0.055326	2.06762e-05	0.00351728	0.0369701	-0.0228796	0.0254358	0.0428471	0.753321	0.632448	0.148641	2.04335e-10	protein_coding	-	ENSG00000132326
PER2	2	239160240-239160402	0.0497938	0.0258249	1.31133e-08	0.00123857	-0.0844536	-0.0596114	2.49253e-05	0.00110608	0.0700349	0.017977	0.0573703	0.0242881	0.400104	0.439363	0.0485112	0.358605	protein_coding	-	ENSG00000132326
PER2	2	239161553-239162343	0.0654834	0.0282764	7.10543e-15	9.95113e-05	-0.107597	-0.0756865	2.8468e-08	6.03321e-06	0.0438999	-0.0125217	0.0559986	-0.0135235	0.684624	0.456228	0.16273	0.178273	protein_coding	-	ENSG00000132326
PER2	2	239164298-239164552	0.0477385	0.0290768	6.94473e-08	3.64804e-05	-0.101904	-0.0871109	7.30824e-07	7.67474e-08	0.0412861	-0.0589533	0.0564662	-0.0468359	0.481481	0.286321	0.165405	0.199242	protein_coding	-	ENSG00000132326
PER2	2	239165563-239165727	0.0569207	0.0260752	2.45381e-11	0.000222339	-0.0548899	-0.0514014	0.00431557	0.0014158	0.00733354	-0.0742124	0.0799981	-0.0525519	0.420244	0.116208	1.41086e-09	3.67745e-13	protein_coding	-	ENSG00000132326
PER2	2	239166917-239167041	0.0578333	0.0249985	1.09917e-11	0.000501964	-0.0729049	-0.0610912	0.000150653	0.000192149	0.0420232	-0.129641	0.0218001	0.0205478	0.056031	0.790996	5.84134e-15	0.106302	protein_coding	-	ENSG00000132326
PER2	2	239167138-239167285	0.0530967	0.0238289	1.00571e-09	0.00112043	-0.0950193	-0.0732583	1.74648e-06	1.36531e-05	0.0716374	-0.00721756	0.0361799	-0.0284702	0.395095	0.635842	0.0991235	0.145976	protein_coding	-	ENSG00000132326
PER2	2	239168610-239168694	NA	0.0149601	NA	0.0537517	NA	-0.0899744	NA	6.4354e-07	NA	NA	0.0243512	-0.000567017	NA	0.881603	NA	4.5295e-17	protein_coding	-	ENSG00000132326
PER2	2	239169469-239169594	0.0491944	0.0154254	4.97011e-09	0.0244016	-0.0576494	-0.0665131	0.0025638	2.48209e-05	-0.0126653	-0.0126151	0.0371548	-0.0925843	0.945237	0.104561	0	0.0181645	protein_coding	-	ENSG00000132326
PER2	2	239170082-239170478	0.0576048	0.0249851	5.94591e-12	0.00116147	-0.0739506	-0.0775022	9.37582e-05	1.36007e-05	0.0273058	-0.0108076	0.00697192	0.00363564	0.853973	0.986192	0	0	protein_coding	-	ENSG00000132326
PER2	2	239170832-239170985	0.0494055	0.0185006	6.76198e-09	0.0125126	-0.103041	-0.0518451	1.55541e-07	0.00218395	0.114604	-0.00904534	0.0151134	-0.0887953	0.0923195	0.197951	1.15861e-10	0.303696	protein_coding	-	ENSG00000132326
PER2	2	239171593-239171699	0.0466743	0.0198954	2.51885e-08	0.00800519	-0.0792649	-0.0405437	3.14117e-05	0.018137	0.153225	0.0889344	0.0169412	-0.105797	0.00260238	0.107425	0.139252	3.80695e-10	protein_coding	-	ENSG00000132326
PER2	2	239176697-239176839	0.0425912	0.0290306	5.13648e-07	0.00011245	-0.0539319	-0.0429866	0.00522904	0.0117142	0.00616091	-0.0576482	0.0262804	-0.00933496	0.596401	0.843256	0	0.176351	protein_coding	-	ENSG00000132326
PER2	2	239179953-239180154	0.0433895	0.0307946	7.17128e-07	2.70771e-05	-0.0750195	-0.0370711	0.000167938	0.0261133	-0.0300956	-0.0140121	0.0526309	-0.0481435	0.819568	0.342113	0	1.87047e-08	protein_coding	-	ENSG00000132326
PER2	2	239181711-239181832	0.0501083	0.0285403	9.25838e-09	0.000125384	-0.0662028	-0.0271436	0.000855241	0.107101	0.051556	-0.0425954	0.0454831	-0.0529512	0.496981	0.373735	1.36999e-10	0.290592	protein_coding	-	ENSG00000132326
PER2	2	239184384-239184538	0.0476752	0.0230272	5.31805e-08	0.00188004	-0.0891483	-0.0605151	1.15675e-05	0.000354259	0.051963	-0.0317066	0.10666	-0.0526489	0.562659	0.0460369	0	0.277716	protein_coding	-	ENSG00000132326
PER2	2	239186348-239186596	0.0511181	0.0242161	5.10919e-09	0.000515986	-0.0897654	-0.055703	8.53662e-06	0.000457188	0.0376585	-0.0541564	0.0535638	0.0053437	0.525098	0.455508	0.361762	0.351432	protein_coding	-	ENSG00000132326
PER3	1	7844714-7845065	0.0459951	0.0313825	9.80636e-08	2.60322e-06	-0.0672571	-0.0508407	0.000731801	0.000850179	-0.0128423	-0.0368777	0.018868	-0.0916481	0.796074	0.114771	0	0.69041	protein_coding	+	ENSG00000049246
PER3	1	7845501-7845646	0.0471153	0.0213818	1.92865e-08	0.000959218	-0.0718143	-0.0539314	0.000179101	0.000265768	0.0274178	0.00450052	0.0278567	-0.134545	0.862493	0.00732643	2.62536e-09	0.231474	protein_coding	+	ENSG00000049246
PER3	1	7846781-7846896	0.0391909	0.015923	2.86007e-06	0.0137698	-0.0767299	-0.0553454	7.67857e-05	0.000191985	0.00455294	0.0049763	0.00435672	-0.092568	0.992005	0.102176	0.208562	0.267204	protein_coding	+	ENSG00000049246
PER3	1	7848105-7848398	0.0485297	0.0311327	3.77061e-09	2.2777e-07	-0.0718527	-0.0530524	0.000135386	0.000104937	0.035878	-0.0699552	0.029992	-0.136137	0.359437	0.00255584	0.257695	0.34663	protein_coding	+	ENSG00000049246
PER3	1	7858585-7858733	0.0549586	0.0318341	6.65494e-11	8.29151e-07	-0.0618651	-0.0498388	0.00121389	0.000661606	-0.0100147	0.0114686	0.03628	-0.134565	0.96274	0.00584961	0	0.26162	protein_coding	+	ENSG00000049246
PER3	1	7861173-7861251	0.0411106	NA	1.71856e-06	NA	-0.0683938	NA	0.000572445	NA	0.0393586	0.00732745	NA	NA	0.750018	NA	0.13612	NA	protein_coding	+	ENSG00000049246
PER3	1	7863107-7863213	0.051783	0.0256122	4.39031e-10	9.32854e-05	-0.0590184	-0.0730071	0.00191822	1.22956e-06	0.0111674	0.0126525	0.0195607	-0.124034	0.949312	0.0175954	6.06768e-18	0.641671	protein_coding	+	ENSG00000049246
PER3	1	7863752-7864018	0.055739	0.0291553	1.3316e-11	3.54042e-06	-0.0775182	-0.07529	3.63852e-05	1.8776e-07	-0.00718089	-0.000418749	-0.0103201	-0.113247	0.989856	0.0247074	0	0.282238	protein_coding	+	ENSG00000049246
PER3	1	7868953-7869058	0.0537925	0.0366537	1.81237e-10	4.38141e-08	-0.0451599	-0.0505108	0.018538	0.000819035	0.0353399	0.0050962	-0.0532304	-0.125637	0.787565	0.00559351	0.0924854	0	protein_coding	+	ENSG00000049246
PER3	1	7869953-7870407	0.0565088	0.038656	2.75405e-10	1.8561e-08	-0.0680896	-0.0735304	0.000798525	2.74639e-06	-0.0581903	0.0484217	-0.0437585	-0.10929	0.425693	0.0258779	1.76762e-09	0.305224	protein_coding	+	ENSG00000049246
PER3	1	7870498-7870648	0.0582967	0.0349223	1.18974e-11	5.10349e-08	-0.0726644	-0.0631334	0.000219523	1.60238e-05	0.00931335	0.0194124	-0.0191557	-0.0981497	0.927901	0.0564327	6.54204e-14	0.510652	protein_coding	+	ENSG00000049246
PER3	1	7879345-7879480	0.0552837	0.0385174	1.17669e-10	1.33894e-09	-0.0858006	-0.0531949	1.5455e-05	0.000217892	0.0152478	-0.0185914	-0.00421533	-0.121171	0.914497	0.0148359	0.27451	0.380779	protein_coding	+	ENSG00000049246
PER3	1	7880175-7880299	0.0626403	0.0386384	1.49214e-13	4.29925e-09	-0.0793392	-0.0629975	4.98672e-05	2.42296e-05	-0.00717945	-0.0217583	-0.0086564	-0.114355	0.920368	0.029299	0.239814	0.30248	protein_coding	+	ENSG00000049246
PER3	1	7880527-7880700	0.0600568	0.0362033	8.61755e-13	3.26423e-08	-0.0947436	-0.0589423	1.14537e-06	7.58884e-05	-0.0201028	-0.031113	0.0343754	-0.107426	0.797209	0.0377561	0.0906751	0.278179	protein_coding	+	ENSG00000049246
PER3	1	7886540-7886770	0.05959	0.0317235	1.39466e-12	4.71553e-07	-0.101178	-0.0592149	2.01873e-07	4.00059e-05	-0.00557301	-0.0215345	0.00919364	-0.12754	0.923834	0.0102792	0.0443021	0.615874	protein_coding	+	ENSG00000049246
PER3	1	7887178-7887875	0.0673586	0.0378015	1.33227e-15	5.32626e-09	-0.092148	-0.0702801	1.81935e-06	2.03549e-06	0.00508201	-0.0374668	0.0470643	-0.098425	0.801168	0.0419965	0.105349	0.433716	protein_coding	+	ENSG00000049246
PER3	1	7889894-7890221	0.0712944	0.0356994	2.2e-16	1.36584e-07	-0.0941462	-0.0815316	7.16905e-07	1.70996e-07	0.0116035	-0.0520383	0.0231132	-0.148105	0.63206	0.00439615	0.0905434	0.307986	protein_coding	+	ENSG00000049246
PER3	1	7895822-7896005	0.0653403	0.0354149	1.9984e-15	3.62913e-07	-0.102458	-0.0760186	6.66109e-08	1.9685e-06	0.0255908	-0.0351759	0.0168313	-0.117024	0.728571	0.0398759	0.126542	0.186273	protein_coding	+	ENSG00000049246
PER3	1	7896868-7897209	0.0653017	0.036649	8.65974e-15	1.88622e-07	-0.110456	-0.0973956	1.81212e-08	2.01829e-09	0.0102766	-0.0259747	0.0358855	-0.0614249	0.887041	0.319046	0.230136	0.336454	protein_coding	+	ENSG00000049246
PER3	1	7902732-7905237	0.0839834	0.0542314	2.2e-16	2.54388e-11	-0.14703	-0.161983	3.9968e-15	2.2e-16	-0.0232505	-0.0423183	-0.0150576	-0.0580754	0.63566	0.52827	0.334672	0.0395306	protein_coding	+	ENSG00000049246
PEX6	6	42933782-42933843	0.043128	0.0174808	4.88858e-06	0.0515701	0.00900661	-0.000581666	0.680483	0.977509	0.0805828	0.161658	0.0654029	0.143003	0.013867	0.0259529	0.0677939	0.202897	protein_coding	-	ENSG00000124587
PGS1	17	76396758-76396936	-0.00542213	-0.0207924	0.542603	0.0158969	-0.0156969	-0.023106	0.44488	0.238625	-0.00114312	-0.0803278	0.26294	0.105007	0.413363	6.79901e-07	0	0.0271022	protein_coding	+	ENSG00000087157
PHF15	5	133897890-133898057	0.0418154	0.00595887	7.09683e-06	0.443339	0.0121148	0.0135119	0.567008	0.445139	0.0378571	-0.0529935	0.0804767	-0.0785582	0.571823	0.096867	0.138735	0	protein_coding	+	ENSG00000043143
PHF15	5	133899862-133900300	0.0455502	-0.00400918	2.44067e-07	0.597251	0.031934	0.0132467	0.112195	0.442854	0.149494	-0.00806551	0.175949	-0.114416	0.023755	0.000169326	1.65894e-07	0	protein_coding	+	ENSG00000043143
PHF15	5	133901806-133902270	0.0480573	0.00813278	1.07689e-07	0.260715	-0.0192738	0.0359538	0.348857	0.0292524	0.131832	-0.0451657	0.14639	-0.0905833	0.0514003	0.00145915	0	0	protein_coding	+	ENSG00000043143
PHF15	5	133914184-133918918	0.0574686	0.0202127	4.16566e-10	0.013062	-0.042211	0.0578367	0.0465063	0.00192677	0.173242	0.0186216	0.201591	0.0181075	0.00988736	0.000389235	0.412231	0.149194	protein_coding	+	ENSG00000043143
PHF16	X	46917569-46920641	-0.0441034	-0.00163758	2.48625e-07	0.811867	0.0556469	-0.00147312	0.00454325	0.925391	0.0977714	-0.0909421	0.0381556	0.0632841	0.0618707	0.234509	0	0.315419	protein_coding	+	ENSG00000102221
PHLDB1	11	118483868-118484611	0.0462713	-0.00694863	2.18017e-07	0.434529	0.00526824	0.00871986	0.794782	0.667986	0.0787135	-0.0150894	0.126939	0.0602131	0.352313	0.0358169	2.31041e-12	0.352105	protein_coding	+	ENSG00000019144
PHLDB1	11	118495650-118495775	0.0400235	-0.00840271	7.46773e-06	0.289804	-0.0106554	0.0227567	0.603563	0.209453	0.0245852	-0.0238421	0.169291	0.0325264	0.844273	0.00212739	0.27027	0.162069	protein_coding	+	ENSG00000019144
PHLDB1	11	118497646-118499366	0.0427692	-0.00230597	1.05385e-06	0.768227	-0.017397	0.0167011	0.384931	0.350488	0.0296494	-0.0144041	0.165962	0.0784732	0.839234	0.000779599	0.340836	0.222486	protein_coding	+	ENSG00000019144
PHLDB1	11	118509318-118509719	0.0449585	-0.00694307	8.96683e-08	0.391816	-0.01588	0.0047944	0.409433	0.796884	-0.0497196	0.0184997	0.126329	0.103917	0.60536	0.00625649	0.442873	0.193827	protein_coding	+	ENSG00000019144
PHLDB1	11	118509880-118510073	0.0409116	-0.00564213	5.56129e-06	0.517361	-0.0248904	0.000982346	0.228239	0.960875	0.0188366	0.010089	0.152011	0.0711184	0.929962	0.00908804	0.283933	8.61212e-09	protein_coding	+	ENSG00000019144
PHLDB1	11	118510125-118512502	0.0397673	-0.0111926	6.56666e-06	0.206598	-0.0413225	-0.00492015	0.0433517	0.808243	-0.00920731	0.0371891	0.106528	0.0710669	0.818616	0.0665753	0.0739793	0.216309	protein_coding	+	ENSG00000019144
PHLDB1	11	118514518-118516543	0.0458488	-0.012796	2.55433e-07	0.164467	-0.033582	-0.00520977	0.0987227	0.805812	-0.0296003	-0.0066278	0.154247	0.0821587	0.859158	0.0100414	0.142801	0.230202	protein_coding	+	ENSG00000019144
PHLDB1	11	118517050-118518792	0.04965	-0.0150439	1.86688e-08	0.0926175	-0.0630951	-0.0211396	0.00190324	0.303769	-0.0376905	-0.0301056	0.17005	0.142192	0.685302	0.000438444	0.205864	4.73937e-11	protein_coding	+	ENSG00000019144
PHLDB1	11	118520782-118520898	0.0439374	-0.00388912	6.57157e-07	0.672698	-0.0484084	-0.0169961	0.0174382	0.420938	-0.0343031	0.0454625	0.136669	0.196606	0.632731	0.000345489	1.64083e-10	0.254971	protein_coding	+	ENSG00000019144
PHLDB1	11	118521150-118521252	0.0396983	-0.00361866	6.25071e-06	0.689564	-0.0459241	-0.0228646	0.0230354	0.272554	0.0277109	0.0503323	0.0755546	0.148981	0.598389	0.0180957	2.86583e-11	0.423457	protein_coding	+	ENSG00000019144
PHLDB1	11	118521306-118526400	0.0510751	0.00400607	5.56561e-10	0.615086	-0.0467713	-0.0114184	0.0129232	0.532673	-0.0601081	-0.0531151	0.138507	0.0764297	0.304784	0.00608076	0.197578	0.5405	protein_coding	+	ENSG00000019144
PIGO	9	35088685-35094356	-0.000615364	-0.00115421	0.945938	0.902702	0.0247859	-0.00997208	0.237449	0.64596	0.0555869	-0.025673	0.243273	0.163885	0.580859	4.80235e-06	1.02592e-11	0.182877	protein_coding	-	ENSG00000165282
PIK3C2B	1	204391756-204394168	-0.0432567	-0.0306202	2.12842e-06	5.9411e-05	0.0960552	0.0485527	8.99289e-06	0.00544547	0.188357	0.0524728	0.0907134	0.0625977	0.00377063	0.0659945	0.246395	0.175517	protein_coding	-	ENSG00000133056
PIK3R1	5	67593240-67597649	0.0411043	0.00842153	7.08777e-07	0.162473	-0.0751263	-0.0257394	0.000106412	0.0634328	0.0230267	0.0553906	0.0336562	-0.00607089	0.554198	0.667662	0.187125	0.523931	protein_coding	+	ENSG00000145675
PITPNA	17	1421287-1423832	-0.0375696	-0.0129992	3.5618e-06	0.0812875	0.0170301	0.0347595	0.365424	0.0430907	0.0764407	-0.0436764	-0.00779572	0.0680895	0.252453	0.401125	0.216435	0.301228	protein_coding	-	ENSG00000174238
PITPNC1	17	65665624-65665779	0.0351369	0.00462511	8.56345e-06	0.623712	-0.0154906	-0.0299593	0.390088	0.165515	-0.0862704	-0.0662108	0.0534174	-0.011966	0.0866036	0.656451	0.215994	0.24403	protein_coding	+	ENSG00000154217
PKN3	9	131464802-131465218	0.00624812	0.0139674	0.452135	0.123218	-0.0297081	-0.0105867	0.122998	0.60999	0.210586	0.16065	0.08074	0.0218344	4.38432e-06	0.325742	0.00846381	0.329597	protein_coding	+	ENSG00000160447
PLA2G4A	1	186946725-186946920	-0.00381556	-0.0460905	0.680512	2.28568e-07	-0.0103465	0.000202501	0.63478	0.991966	0.0272153	-0.0567025	0.0380063	0.0583404	0.622605	0.464384	0.0557964	0	protein_coding	+	ENSG00000116711
PLCB1	20	8862269-8865547	0.0360114	0.0101606	2.75306e-05	0.155945	-0.114231	-0.0275906	3.20395e-08	0.0931059	-0.0661711	-0.11303	0.0353855	0.0628079	0.0737303	0.287831	0.60831	0.235821	protein_coding	+	ENSG00000182621
PLD6	17	17104309-17106412	0.0243049	0.0349855	0.00676788	0.000174261	-0.0535547	-0.103454	0.0133895	1.78783e-06	0.0663888	0.112722	-0.036799	0.0302242	0.099388	0.746745	0.588105	0.373542	protein_coding	-	ENSG00000179598
PLD6	17	17109174-17109646	0.0381983	0.0228605	6.35507e-06	0.0102532	-0.0306111	-0.021868	0.11437	0.281052	0.182393	0.0520858	0.0159454	-0.0443985	0.00144667	0.736748	0.272914	0.265037	protein_coding	-	ENSG00000179598
PLEC	8	145003582-145003739	0.0302208	0.0189094	9.39385e-06	0.00236318	0.0191355	0.00521749	0.221393	0.712188	0.0062568	0.0891886	0.0507466	-0.032512	0.153679	0.33398	0.267096	0.282504	protein_coding	-	ENSG00000178209
PLEC	8	145006961-145007279	0.0326773	0.0195113	1.1668e-06	0.00234125	0.0161788	0.00916188	0.291275	0.530502	0.0464286	0.0669929	0.090006	-0.0485188	0.167581	0.0491241	0.271222	0.419346	protein_coding	-	ENSG00000178209
PLEC	8	145007365-145007519	0.0342852	0.0227185	1.46219e-06	0.0004781	0.0132089	0.0107097	0.417989	0.468601	0.0354674	0.0810739	0.0960909	-0.0859788	0.167083	0.0118131	0.351582	0.311157	protein_coding	-	ENSG00000178209
PLEC	8	145008486-145008613	0.0328657	0.0146676	4.06611e-06	0.0288098	0.0115679	0.00165173	0.477373	0.913869	0.0707478	0.0657815	0.0760922	-0.0657632	0.0994169	0.0780286	0.319466	0.322926	protein_coding	-	ENSG00000178209
PLEC	8	145009179-145009285	0.0351649	0.021796	2.03247e-06	0.00128978	0.00263046	0.00885531	0.876603	0.564328	0.0729873	0.0826419	0.0627521	-0.0754391	0.0647006	0.0990825	0.531227	0.234926	protein_coding	-	ENSG00000178209
PLEKHG4B	5	182119-190085	NA	-0.00525566	NA	0.563189	NA	-0.0275774	NA	0.188383	NA	NA	0.177627	0.242107	NA	2.06691e-06	NA	0.239224	protein_coding	+	ENSG00000153404
PLIN1	15	90207596-90209173	0.00223222	0.00546262	0.792056	0.554674	0.00748971	0.0148696	0.706356	0.486492	-0.0358328	0.0385108	0.200847	0.209018	0.660357	6.71902e-06	0.206227	1.02728e-09	protein_coding	-	ENSG00000166819
PLIN1	15	90210167-90210412	0.00898369	0.00189165	0.258874	0.838612	-0.00636551	0.0151046	0.728675	0.482153	-0.0226786	-0.0369033	0.246738	0.200176	0.705086	6.32681e-07	0.398434	2.38819e-10	protein_coding	-	ENSG00000166819
PLIN1	15	90210833-90211024	0.0124132	0.000958036	0.126711	0.916563	0.00386508	0.0234462	0.836466	0.266647	-0.00483003	-0.0537689	0.225267	0.201709	0.620934	1.49089e-06	0.235068	0	protein_coding	-	ENSG00000166819
PLIN1	15	90212731-90212903	0.0139383	0.0043616	0.0861747	0.635414	0.00514366	0.0240175	0.782752	0.259262	-0.0195836	-0.0439165	0.23927	0.185912	0.668771	1.6413e-06	0.191258	4.10597e-15	protein_coding	-	ENSG00000166819
PLIN1	15	90213211-90213475	0.0116302	0.00696194	0.164376	0.451785	0.00123214	0.0219983	0.948954	0.301596	-0.0211069	-0.0283177	0.231088	0.173484	0.806709	5.01817e-06	0.356713	2.74727e-10	protein_coding	-	ENSG00000166819
PLIN1	15	90216441-90216645	0.00834204	0.00222061	0.297749	0.813589	-0.00164971	0.0117079	0.928808	0.590807	-0.014373	-0.046538	0.219897	0.187545	0.658603	9.89305e-06	0.397275	1.60202e-18	protein_coding	-	ENSG00000166819
PLIN2	9	19115760-19116647	-0.0385373	-0.0184199	6.5764e-06	0.0389774	0.0179234	0.0177964	0.365167	0.384554	-0.0238352	-0.12411	0.0454655	-0.0163529	0.0883997	0.701884	0.115869	0.314675	protein_coding	-	ENSG00000147872
PLIN4	19	4502204-4504797	-0.00999147	0.00282482	0.188548	0.759864	0.00846039	0.0171729	0.634909	0.421027	-0.0366475	0.0891305	0.211508	0.190224	0.192042	8.50187e-06	6.82491e-09	0	protein_coding	-	ENSG00000167676
PLIN4	19	4504873-4504959	-0.000187299	0.00340683	0.980522	0.718128	0.00259837	0.00481083	0.883359	0.825698	-0.0305279	0.0870915	0.246768	0.222433	0.212841	3.0028e-07	0.0167791	2.10573e-09	protein_coding	-	ENSG00000167676
PLIN4	19	4508780-4508967	0.000736242	0.00322889	0.925001	0.733064	0.0029697	0.0173544	0.869505	0.425809	-0.0174565	0.0485713	0.230153	0.208282	0.628047	1.57348e-06	0.130397	0	protein_coding	-	ENSG00000167676
PLIN4	19	4510458-4513716	0.000995602	0.00380055	0.909806	0.689934	-0.000974457	0.0246093	0.961585	0.262863	0.0707793	0.0511817	0.255362	0.184867	0.282566	1.16974e-06	0.34499	0	protein_coding	-	ENSG00000167676
PLXND1	3	129275926-129276066	0.0373605	-0.000632223	8.68859e-06	0.946015	-0.021378	-0.0267703	0.268733	0.210782	0.00507453	-0.0998223	0.074834	0.0618447	0.214649	0.257134	0.0162882	0.280999	protein_coding	-	ENSG00000004399
PLXND1	3	129278008-129278626	0.0399686	0.00377184	7.06357e-06	0.688481	-0.0374096	-0.00402444	0.0714677	0.851679	0.0985928	-0.0488169	0.112695	0.0140135	0.168393	0.149956	0.30604	0.450922	protein_coding	-	ENSG00000004399
PLXND1	3	129304795-129304924	0.0386284	0.013194	3.71951e-06	0.0620916	0.00486373	0.0164728	0.800148	0.306434	0.0661044	-0.0373546	0.0497853	-0.131719	0.371796	0.0146514	0.312693	0.29711	protein_coding	-	ENSG00000004399
PLXND1	3	129305015-129305115	0.0386989	0.0103034	2.14058e-06	0.1422	0.00760581	0.0146066	0.684384	0.361902	0.0439363	-0.00368027	0.0740164	-0.127496	0.688634	0.00882105	1.32183e-11	0.364058	protein_coding	-	ENSG00000004399
PMEPA1	20	56286380-56286592	0.0450936	NA	1.42146e-07	NA	-0.062201	NA	0.0016551	NA	-0.0174964	-0.0665899	NA	NA	0.476477	NA	0.765056	NA	protein_coding	-	ENSG00000124225
PODXL	7	131185021-131189267	0.0488708	0.0219702	1.9446e-08	0.00213106	-0.125453	-0.0441398	1.73353e-09	0.00674156	0.0197795	-0.106879	0.0605998	0.0194514	0.200427	0.348638	0.0875134	0.0804761	protein_coding	-	ENSG00000128567
PODXL	7	131191019-131191080	0.0414811	0.0180834	3.1395e-06	0.0116338	-0.0617365	-0.00755038	0.00268389	0.643688	0.0239873	-0.0813681	0.0193006	-0.0494452	0.379361	0.552619	0.296297	0.183837	protein_coding	-	ENSG00000128567
PODXL	7	131191338-131191686	0.0434183	0.017776	1.08679e-06	0.00688038	-0.0716818	-0.00731749	0.000538572	0.624818	0.072088	-0.101294	0.0510162	-0.0372751	0.120589	0.346313	0.321595	0.0358432	protein_coding	-	ENSG00000128567
PODXL	7	131193710-131194344	0.0407955	0.016829	6.31531e-06	0.0103112	-0.0901222	-0.02755	2.24471e-05	0.0647521	0.0535516	-0.0890987	0.0727453	-0.0380277	0.250839	0.156046	4.95125e-14	0.198564	protein_coding	-	ENSG00000128567
PODXL	7	131195587-131196198	0.0411834	0.0120861	4.02624e-06	0.0611689	-0.0737376	-0.0258815	0.000389962	0.0780627	0.0603828	-0.137058	0.0650048	-0.0826234	0.0513635	0.0541919	0.0460544	0.099106	protein_coding	-	ENSG00000128567
POLA1	X	25013922-25015103	0.0103104	0.0239614	0.267439	0.00314185	-0.0545872	-0.0885014	0.0116104	2.54669e-06	-0.0223883	0.0284946	-0.118697	0.166458	0.84713	0.00116469	0.197477	0	protein_coding	+	ENSG00000101868
POLG	15	89871687-89871766	0.0144237	0.00935046	0.0978963	0.286623	-0.0220942	-0.00797342	0.269517	0.690011	0.0512606	-0.0810031	0.269172	0.0863421	0.264687	1.40236e-06	0.118655	1.04334e-19	protein_coding	-	ENSG00000140521
POLR1A	2	86269012-86269226	-0.000444116	0.00973373	0.960562	0.221659	-0.0125073	0.0330957	0.546394	0.0690931	0.0358124	-0.0265984	0.216917	-0.172177	0.749393	1.45736e-06	0.255271	0.279002	protein_coding	-	ENSG00000068654
POP4	19	30106151-30108162	-0.0125405	-0.0147369	0.134585	0.037086	0.00574514	0.0170723	0.766924	0.288036	-0.0698168	0.00196678	-0.202666	0.154177	0.414764	4.63497e-07	0.203495	0.190094	protein_coding	+	ENSG00000105171
PPARG	3	12421203-12421430	0.0421276	-0.00551485	1.81177e-07	0.545102	-0.0826273	0.0132048	1.03843e-05	0.526464	0.0372896	0.0296473	0.053836	0.117938	0.632577	0.0870112	0.0759413	0.51059	protein_coding	+	ENSG00000132170
PPARG	3	12422821-12422990	0.0445466	-0.0062304	4.66392e-08	0.500663	-0.076692	0.0181428	5.84474e-05	0.390725	-0.0463299	0.02046	0.160928	0.129358	0.630326	0.00156697	0.0990421	0.0429521	protein_coding	+	ENSG00000132170
PPARG	3	12434113-12434251	0.0465961	-0.00819727	1.62179e-08	0.383015	-0.0827224	0.0267321	1.56182e-05	0.215056	-0.0537111	0.0405126	0.131496	0.0389749	0.458639	0.0613664	0.278584	0.0149378	protein_coding	+	ENSG00000132170
PPARG	3	12447381-12448345	0.0467044	-0.0031241	2.35067e-08	0.732795	-0.0858033	0.0378713	9.5324e-06	0.0723382	-0.0277023	0.109022	0.130037	0.0983252	0.138071	0.0166546	0.201396	0.00898051	protein_coding	+	ENSG00000132170
PPARG	3	12458203-12458653	0.0448752	-0.0058457	6.98663e-08	0.530741	-0.100851	0.0153971	2.22957e-07	0.474331	-0.0355896	0.081958	0.133406	0.0912391	0.289099	0.0213278	0.121772	0.42143	protein_coding	+	ENSG00000132170
PPFIA4	1	203044705-203047864	0.0160145	-0.0396484	0.0738008	6.27991e-06	-0.0130596	0.00590309	0.523019	0.768068	-0.0628975	-0.0531318	0.0217989	0.104683	0.32047	0.181678	0.0562245	0.129635	protein_coding	+	ENSG00000143847
PPFIBP1	12	27786295-27786393	0.0406386	NA	1.74347e-06	NA	0.000406977	NA	0.983361	NA	0.045832	0.0309002	NA	NA	0.588385	NA	0	NA	protein_coding	+	ENSG00000110841
PPFIBP1	12	27820099-27820253	0.0381619	0.00925427	9.53708e-06	0.100746	-0.0103886	0.0070846	0.599158	0.58181	0.0322488	-0.00412481	0.0424498	-0.0456516	0.835206	0.25856	0	0.184679	protein_coding	+	ENSG00000110841
PPFIBP1	12	27829361-27829532	0.0455853	0.00118359	3.78324e-08	0.849097	-0.0153473	0.00392898	0.417979	0.781968	0.00348823	-0.0468575	0.0425747	-0.0844577	0.707849	0.0823795	3.04297e-09	0	protein_coding	+	ENSG00000110841
PPFIBP1	12	27832422-27832572	0.0417855	0.0115974	7.80661e-07	0.0693221	-0.0375941	0.00567385	0.0527407	0.696171	-0.0190786	-0.0852602	0.0204426	-0.0836577	0.312175	0.141919	7.22034e-10	0.305303	protein_coding	+	ENSG00000110841
PPFIBP1	12	27832733-27832994	0.0409183	0.00239171	2.54744e-06	0.718258	-0.0324101	-0.00183371	0.106716	0.903393	0.0033942	-0.0197746	0.0570868	-0.0682065	0.9452	0.136524	0.184867	0.426489	protein_coding	+	ENSG00000110841
PPFIBP1	12	27844682-27844861	0.0407078	-0.00191198	1.77974e-06	0.767481	-0.0200981	0.00141538	0.307176	0.924004	0.0750496	0.0122348	0.0635711	-0.012318	0.359202	0.285078	6.86828e-15	0.558363	protein_coding	+	ENSG00000110841
PPFIBP1	12	27845729-27848497	0.0641668	-0.0114192	2.35367e-14	0.128925	-0.0598056	-0.010205	0.00201725	0.559963	0.069909	-0.0181308	0.0659379	0.0509554	0.393353	0.218195	0.464102	3.59077e-10	protein_coding	+	ENSG00000110841
PPL	16	4932508-4936048	0.0423388	0.0173508	1.31553e-06	0.0439743	-0.0779886	-0.0140302	0.00011703	0.480213	-0.0461563	-0.0779799	-0.149133	-0.091407	0.266465	0.00545258	0.181798	0.589408	protein_coding	-	ENSG00000118898
PPL	16	4938103-4938219	0.0448562	0.0252257	6.49353e-07	0.00476164	-0.0544001	-0.00794854	0.00813629	0.695781	-0.0542532	-0.12609	-0.0869339	-0.0692513	0.0575331	0.132334	0.0452453	0.0463815	protein_coding	-	ENSG00000118898
PPL	16	4940185-4940335	0.0413028	0.0252863	4.30073e-06	0.00329513	-0.0439316	0.00983217	0.0327785	0.615225	-0.0413241	-0.0993139	-0.0522635	-0.0948301	0.175174	0.141039	1.40753e-09	0.399991	protein_coding	-	ENSG00000118898
PPL	16	4940729-4940922	0.0438065	0.0188434	5.34345e-07	0.0151161	-0.039984	0.01086	0.0464629	0.538601	-0.0381104	-0.0847441	0.00589707	-0.119729	0.265479	0.0724592	0.0894717	0.347382	protein_coding	-	ENSG00000118898
PPL	16	4941812-4941950	0.0463149	0.0238407	2.57166e-07	0.00405797	-0.0401796	-0.00474498	0.0505559	0.801118	-0.0258293	-0.109858	0.00323737	-0.158689	0.156797	0.0168989	0	0.0507677	protein_coding	-	ENSG00000118898
PPL	16	4942036-4942214	0.0446623	0.0272237	7.50513e-07	0.00106174	-0.0407107	0.0067936	0.0494698	0.718777	-0.0230489	-0.0503483	-0.023785	-0.12148	0.633055	0.0761494	0.143796	0.307647	protein_coding	-	ENSG00000118898
PPL	16	4943214-4943371	0.039626	0.0265311	7.82233e-06	0.000739176	-0.0319475	0.017528	0.117915	0.325775	-0.0248973	-0.0496115	-0.0172264	-0.0927596	0.632154	0.192397	0.0177955	0.145016	protein_coding	-	ENSG00000118898
PPL	16	4943542-4943639	0.0394347	0.0195392	6.10197e-06	0.0248221	-0.0482987	0.0143042	0.0154491	0.471822	0.00227387	-0.0669788	0.00463852	-0.0760906	0.513857	0.429066	0	0.344213	protein_coding	-	ENSG00000118898
PPL	16	4944468-4944619	0.039647	0.0251003	8.65292e-06	0.0034261	-0.0437963	0.0103851	0.0316426	0.595566	0.0123608	-0.10014	-0.0112239	-0.0823785	0.240298	0.347079	0.000599431	0.343602	protein_coding	-	ENSG00000118898
PPL	16	4945262-4945408	0.0421166	0.0237563	1.97857e-06	0.00748328	-0.0467086	0.00590909	0.0205972	0.770737	-0.0141687	-0.0654511	0.0105878	-0.0983545	0.506765	0.259181	1.73451e-09	0.158908	protein_coding	-	ENSG00000118898
PPL	16	4945595-4945717	0.0454861	0.0269775	2.95904e-07	0.0019372	-0.0526288	0.0121511	0.00931288	0.538536	-0.0223756	-0.111603	-0.00773346	-0.121796	0.143393	0.109216	4.19497e-14	0.0145965	protein_coding	-	ENSG00000118898
PPL	16	4949014-4949121	0.0427905	0.0159979	6.39035e-07	0.0455566	-0.023212	0.00770782	0.236458	0.673896	0.0175177	-0.0906221	-0.0212782	-0.0838276	0.282002	0.261581	0.119291	0.100339	protein_coding	-	ENSG00000118898
PPL	16	4949224-4949385	0.0460744	0.0171218	8.29082e-08	0.0270477	-0.0229302	0.014107	0.242428	0.425157	-0.0136602	-0.0326013	0.00302265	-0.080359	0.818877	0.309003	0.0297429	0.0919633	protein_coding	-	ENSG00000118898
PPL	16	4950965-4951090	0.0412422	0.0248108	4.67081e-06	0.00284771	-0.0175897	0.0177663	0.394934	0.34708	0.00727599	-0.0848126	0.025353	-0.143807	0.376994	0.0356006	0.03895	0	protein_coding	-	ENSG00000118898
PPL	16	4952407-4952527	0.0472694	0.0188301	5.61678e-08	0.0192355	-0.0257441	0.0249033	0.193638	0.175795	-0.038791	-0.107383	0.011895	-0.137597	0.133376	0.0410024	1.41974e-08	0.359309	protein_coding	-	ENSG00000118898
PPL	16	4953887-4954041	0.0456838	0.0159399	9.99579e-08	0.0403543	-0.0285655	0.00933697	0.143253	0.598976	-0.0455972	-0.0577179	-0.000908261	-0.14383	0.400526	0.0235996	0	0.120885	protein_coding	-	ENSG00000118898
PPL	16	4960851-4960950	0.0417739	0.0238212	3.33813e-06	0.00570909	-0.0477913	0.0157548	0.0201469	0.422803	-0.0516061	-0.0570417	-0.000378822	-0.0873595	0.385214	0.317922	2.77969e-12	6.73245e-08	protein_coding	-	ENSG00000118898
PPM1D	17	58740356-58742036	-0.00782931	-0.0135829	0.333902	0.0756277	0.0379635	0.0146612	0.0437719	0.401716	0.201811	-0.20756	0.127183	0.0177975	1.20087e-06	0.0250916	2.05259e-07	3.96162e-10	protein_coding	+	ENSG00000170836
PPP1R10	6	30572365-30572871	0.000274319	-0.0131283	0.975687	0.133559	0.0656804	0.0276013	0.0017667	0.166269	0.299686	0.0128689	0.234106	0.00907507	1.41523e-06	9.52707e-05	1.36207e-11	0.0575361	protein_coding	-	ENSG00000204569
PPP1R10	6	30573586-30573812	-0.00884179	-0.00113403	0.318555	0.89327	0.0519399	0.0219796	0.0116025	0.253717	0.2801	-0.0024654	0.125985	0.0150637	3.61311e-06	0.0532184	0.109357	1.42489e-08	protein_coding	-	ENSG00000204569
PPP1R10	6	30584255-30584775	-4.94577e-05	-0.00774295	0.995557	0.328004	0.044939	0.0444421	0.0296228	0.0140902	0.309615	0.00174777	0.136343	-0.0729914	3.37356e-07	0.0112878	0.104298	0.158661	protein_coding	-	ENSG00000204569
PPP1R13B	14	104202340-104204197	0.0215392	-0.00423901	0.0198481	0.638167	-0.0419971	0.0186809	0.0512038	0.370529	0.206873	0.0110039	0.181083	0.23654	0.00194108	2.53929e-06	1.09199e-11	0.0961504	protein_coding	-	ENSG00000088808
PPP1R14A	19	38746779-38747231	5.07203e-05	-0.00599817	0.9949	0.481512	-0.00741315	0.0194844	0.691578	0.319378	0.0840616	0.190692	0.116354	0.248405	0.000586789	6.69672e-06	0.355148	2.24446e-11	protein_coding	-	ENSG00000167641
PPP2R1B	11	111608605-111612336	-0.0466534	-0.0129159	8.49656e-08	0.0903181	0.109213	-0.00640744	1.34168e-07	0.715493	-0.0140808	0.0135685	0.107907	0.177762	0.946739	0.00014914	0.140208	0.294068	protein_coding	-	ENSG00000137713
PPP3CA	4	101944566-101947218	-0.0437862	0.00253768	5.55545e-08	0.713951	0.0322607	-0.00229677	0.0859386	0.886067	-0.0317253	-0.091577	-0.00899855	0.0625776	0.204481	0.412446	0.557965	0.299279	protein_coding	-	ENSG00000138814
PPP3R1	2	68405989-68408142	-0.0385561	-0.0179336	8.02972e-07	0.0135174	0.0135493	0.00982834	0.460265	0.558082	-0.0115604	0.016265	0.0660515	0.0474062	0.933718	0.205235	0.322537	0	protein_coding	-	ENSG00000221823
PPRC1	10	103898857-103901761	-0.0171473	0.0153312	0.0563654	0.0755059	0.0488118	-0.0161247	0.02004	0.412584	0.29101	0.0452774	0.177128	-0.0195843	1.93642e-06	0.00451766	5.04407e-10	0.463281	protein_coding	+	ENSG00000148840
PREB	2	27354540-27354950	-0.0109274	-0.0140984	0.173047	0.0543929	-0.0375816	0.0242019	0.0444696	0.147528	-0.0566868	0.0273323	0.173947	0.161394	0.475916	2.37598e-06	0.528896	0.146286	protein_coding	-	ENSG00000138073
PREB	2	27355985-27357543	-0.0044353	-0.014569	0.58475	0.0639232	-0.0369113	0.00181559	0.0506947	0.919511	0.033813	-0.0150549	0.256077	0.120689	0.779138	9.34739e-08	0.349692	0.0464016	protein_coding	-	ENSG00000138073
PRKCD	3	53199120-53199231	0.043654	NA	1.08521e-06	NA	-0.0370587	NA	0.0681123	NA	0.0641152	0.00532573	NA	NA	0.503857	NA	0.0205931	NA	protein_coding	+	ENSG00000163932
PRKCD	3	53212420-53212553	0.0461966	-0.00670563	3.47633e-07	0.466829	-0.050309	0.0186332	0.0157394	0.375246	0.00222281	-0.0299551	0.071185	0.112805	0.887627	0.0730575	0.0304598	0.0794537	protein_coding	+	ENSG00000163932
PRKCD	3	53213593-53213792	0.050055	0.000241874	7.09268e-08	0.978625	-0.0688169	0.0430801	0.00140409	0.0365861	0.0161711	-0.0094621	0.0385326	0.0463169	0.953207	0.568345	0.172424	0.0329038	protein_coding	+	ENSG00000163932
PRKCD	3	53215223-53215283	0.0548398	-0.000277165	2.21963e-09	0.976081	-0.0326746	0.0266766	0.117893	0.205116	0.0297892	0.00917066	0.00343341	0.0458176	0.8571	0.754717	0.16322	8.97924e-10	protein_coding	+	ENSG00000163932
PRKCD	3	53215460-53215622	0.0504067	-0.00864404	5.85075e-08	0.325859	-0.0682248	0.0130306	0.00147438	0.515424	-0.00173317	-0.025675	0.107725	-0.00902344	0.91745	0.145335	0	0.172029	protein_coding	+	ENSG00000163932
PRKCD	3	53215717-53215748	0.0405888	0.000516666	4.99863e-06	0.955363	-0.0684999	-0.0051283	0.000858136	0.807863	-0.038194	-0.0217572	0.0933252	-0.00949085	0.722599	0.274447	1.34551e-14	2.07853e-12	protein_coding	+	ENSG00000163932
PRKCD	3	53217137-53217222	0.0451344	0.0116003	9.17755e-08	0.191891	-0.0512354	0.0235602	0.00780141	0.244302	0.031784	-0.0531654	0.0240828	-0.000222699	0.546407	0.909669	1.50265e-10	0	protein_coding	+	ENSG00000163932
PRKCD	3	53217468-53217597	0.0482037	0.000321641	7.01505e-08	0.971241	-0.0688489	-0.012621	0.000764212	0.535316	0.0242401	0.00189615	-0.112574	-0.0247558	0.905847	0.109789	7.48046e-11	0.316821	protein_coding	+	ENSG00000163932
PRKCD	3	53218890-53218990	0.0430111	-0.0166037	2.05492e-06	0.0716673	-0.0629814	0.00838606	0.00249602	0.690803	-0.0582028	0.0506608	0.02953	-0.0334986	0.433674	0.773291	1.38922e-08	0	protein_coding	+	ENSG00000163932
PRKCD	3	53219620-53219716	0.0504	-0.00748584	8.20545e-09	0.341573	-0.0579496	0.0404786	0.00384327	0.0248774	-0.0247836	0.0542084	0.0324879	-0.132198	0.600989	0.0420491	3.72466e-12	2.47867e-12	protein_coding	+	ENSG00000163932
PRKCD	3	53219943-53220043	0.0513482	0.00344067	1.30498e-08	0.67717	-0.0711229	0.0227795	0.000596415	0.226231	0.00167055	0.0425716	0.0559781	-0.0887382	0.778566	0.175368	0	0.056838	protein_coding	+	ENSG00000163932
PRKCD	3	53220183-53220356	0.0481652	0.00285704	1.55418e-07	0.723997	-0.0798446	0.0130198	0.000175843	0.481523	-0.00556916	0.0359521	0.0672449	-0.00366645	0.843603	0.415926	7.42336e-10	0.217549	protein_coding	+	ENSG00000163932
PRKCD	3	53220620-53220711	0.0428247	-0.0041111	1.56529e-06	0.626065	-0.0776912	0.0121312	0.000167637	0.530082	0.0395528	0.00962958	0.0564863	0.00417787	0.760748	0.557228	1.31655e-12	0.550003	protein_coding	+	ENSG00000163932
PRKCD	3	53221356-53221418	0.04706	0.00751788	4.2128e-07	0.361633	-0.0693556	0.00626684	0.00138474	0.739308	-0.0638245	-0.00183923	-0.00928254	-0.00649159	0.550757	0.975647	4.65408e-13	0.152151	protein_coding	+	ENSG00000163932
PRKCD	3	53222736-53222874	0.0486847	-0.00127827	4.72384e-08	0.867058	-0.0712466	-0.00219151	0.000581267	0.899886	-0.038902	0.0776052	0.0327214	0.0172163	0.364008	0.733644	0	0.401568	protein_coding	+	ENSG00000163932
PRKCD	3	53223074-53223262	0.0443126	-0.00253994	6.41796e-07	0.727566	-0.0684754	0.011834	0.00100283	0.479142	-0.0540189	0.0776057	0.0176622	0.00255216	0.300012	0.92573	0.122815	1.44856e-13	protein_coding	+	ENSG00000163932
PRKCD	3	53223889-53224017	0.0422819	-0.0231141	4.55098e-06	0.00130823	-0.0675519	0.00961125	0.00176838	0.555226	-0.073862	-0.00228286	-0.0188161	0.00136465	0.447352	0.914507	0.221457	1.05436e-09	protein_coding	+	ENSG00000163932
PRKCD	3	53226124-53226733	0.0417305	-0.0114023	3.39253e-06	0.094937	-0.0614767	-0.00281808	0.00329877	0.855882	-0.0577167	0.0224471	-0.0621614	0.0594605	0.566402	0.167752	0.127207	1.9803e-09	protein_coding	+	ENSG00000163932
PRPSAP1	17	74307014-74307781	-0.0417306	0.00737831	9.83213e-07	0.41138	0.049347	-0.0394795	0.0116339	0.0567184	-0.0171118	0.0522194	0.043021	0.219	0.639086	0.00106135	5.02221e-09	0.504975	protein_coding	-	ENSG00000161542
PRPSAP1	17	74308950-74309097	-0.0390907	-0.00300131	6.09427e-06	0.733897	0.0230716	-0.0289271	0.242656	0.151075	-0.00229475	-0.0109686	0.030435	0.185594	0.980913	0.00582901	0.328385	0	protein_coding	-	ENSG00000161542
PRR16	5	119799973-119800340	0.04318	NA	1.96726e-06	NA	-0.0372732	NA	0.0715702	NA	0.0527377	-0.103031	NA	NA	0.166204	NA	1.31741e-17	NA	protein_coding	+	ENSG00000184838
PRR16	5	120021649-120023027	0.0487989	0.0209001	5.02465e-08	0.019884	-0.0789913	-0.0695169	0.000149879	0.000754974	0.053197	-0.0812988	0.0287064	-0.0399929	0.276385	0.719097	0.416594	0.143227	protein_coding	+	ENSG00000184838
PRR5	22	45126490-45127701	0.0674345	0.00856157	1.28786e-14	0.331422	-0.0654609	-0.0061746	0.000934672	0.758544	0.0662861	0.105919	0.174428	0.0621719	0.0739509	0.0031171	1.67109e-09	0.224374	protein_coding	+	ENSG00000186654
PRR5	22	45129988-45131042	0.0409473	0.0127691	3.69656e-08	0.128616	-0.052862	0.0151145	0.0018485	0.432037	-0.0219	0.088995	0.159393	0.0821104	0.186043	0.00294175	0.172278	0.0694467	protein_coding	+	ENSG00000186654
PRR5-ARHGAP8	22	45258155-45258586	-0.0535009	-0.0340181	5.12679e-10	8.64558e-05	0.0635745	0.034939	0.00119673	0.078713	-0.12202	0.046182	0.120536	0.172646	0.0562688	0.00075249	1.94715e-07	0.117434	protein_coding	+	ENSG00000248405
PRR5L	11	36422547-36422835	-0.0447915	NA	2.26612e-06	NA	0.0458579	NA	0.0391422	NA	0.00173803	0.0708711	NA	NA	0.554028	NA	0.109065	NA	protein_coding	+	ENSG00000135362
PRR5L	11	36483892-36486754	-0.0434361	-0.0206362	1.02879e-06	0.0261332	0.112453	0.0740574	1.27328e-07	0.000617689	0.0607356	0.0732443	0.197811	0.0871012	0.266578	0.00110991	0.204822	3.31865e-09	protein_coding	+	ENSG00000135362
PRUNE2	9	79226292-79229516	0.0131195	-0.00133166	0.158615	0.871111	-0.00761249	-7.5142e-05	0.730001	0.996829	-0.0194695	-0.0686534	0.189198	0.170316	0.53402	7.03412e-06	0.276777	0.434841	protein_coding	-	ENSG00000106772
PSMD11	17	30807507-30809398	-0.0387018	-0.0178648	3.05825e-06	0.0339759	0.0519445	0.0367947	0.00652355	0.0579473	0.0497965	-0.0883791	-0.0437132	0.0738173	0.196562	0.334854	0.0161195	0.0969068	protein_coding	+	ENSG00000108671
PSME4	2	54091204-54093360	-0.0493779	-0.0150617	2.92639e-09	0.0529158	0.0360297	-0.0113478	0.0572031	0.527088	-0.00684486	0.0145667	0.0052498	0.118783	0.958995	0.0793271	0.345104	4.40157e-12	protein_coding	-	ENSG00000068878
PTCH2	1	45295286-45295433	-0.00643801	-0.00933915	0.468456	0.318644	0.00582685	-0.00732501	0.774064	0.732361	-0.0149582	-0.0475991	0.155755	0.246922	0.687846	9.88361e-06	5.70884e-15	0.168388	protein_coding	-	ENSG00000117425
PTCHD1	X	23410648-23422489	NA	-0.00222791	NA	0.775714	NA	0.00913314	NA	0.610675	NA	NA	0.1763	0.185965	NA	1.97858e-06	NA	0.442381	protein_coding	+	ENSG00000165186
PTGDS	9	139871956-139872144	0.00197797	0.0034438	0.81829	0.709806	0.0151211	0.0049221	0.464319	0.817934	-0.0824087	-0.00416298	-0.106655	-0.287754	0.344212	4.98475e-06	0.568698	0.376497	protein_coding	+	ENSG00000107317
PTGDS	9	139874368-139874736	0.00200154	-0.00365998	0.822739	0.695859	0.0166693	-0.00317971	0.434472	0.883259	-0.0509871	-0.0383502	-0.153734	-0.259463	0.553346	5.45373e-06	0.60051	0.445275	protein_coding	+	ENSG00000107317
PTGER4	5	40691881-40693837	-0.0459225	0.000188138	9.95213e-08	0.982987	0.0734098	-0.0448331	0.000227805	0.0274746	0.0285732	-0.134606	-0.000946691	-0.0298111	0.0633504	0.879711	0.532203	5.23759e-14	protein_coding	+	ENSG00000171522
PTGES3	12	57059416-57060050	-0.00436185	-0.0154094	0.62048	0.047443	0.0206165	-0.00695103	0.307768	0.695821	0.16425	-0.102082	0.213505	0.106089	0.00352125	6.05616e-06	1.88001e-12	0.303742	protein_coding	-	ENSG00000110958
PTP4A3	8	142431488-142432445	0.0386033	0.0316957	6.18598e-06	0.000575188	-0.105995	-0.0550248	1.11105e-07	0.00874684	0.18942	0.101997	0.0227643	0.135032	0.00036469	0.0824494	0.224002	0	protein_coding	+	ENSG00000184489
PTP4A3	8	142437850-142437924	0.0488935	0.0147448	1.19271e-08	0.128221	-0.0239127	-0.0440719	0.216752	0.0478673	-0.0215255	0.0273879	0.0170723	0.103854	0.826865	0.273402	0	1.09755e-09	protein_coding	+	ENSG00000184489
PTPN3	9	112137974-112141913	0.0374862	-0.0143693	7.06161e-07	0.0782081	-0.0233636	-0.00747711	0.185872	0.690303	0.103477	0.091406	-0.0308982	0.067933	0.0171991	0.414783	0.511497	1.89205e-16	protein_coding	-	ENSG00000070159
PTPN3	9	112143932-112144067	0.0439043	-0.014069	4.08319e-08	0.128176	-0.0109516	0.00395601	0.547431	0.853481	0.0911244	0.0242471	0.0817513	0.0606703	0.151983	0.218613	0.224385	0.128119	protein_coding	-	ENSG00000070159
PTPRF	1	44086768-44086903	0.0219099	0.00940925	0.0121499	0.278404	-0.0369627	0.0473697	0.0676172	0.0178073	-0.02912	0.0741734	0.168605	0.254015	0.4108	3.39652e-07	6.14518e-10	5.88517e-13	protein_coding	+	ENSG00000142949
PTPRF	1	44087606-44089343	0.0125989	0.00616847	0.159794	0.402762	-0.0455292	0.028757	0.0318651	0.0901605	-0.0790744	0.193218	-0.0201754	0.257657	0.00437881	2.54205e-06	0.203353	0.453509	protein_coding	+	ENSG00000142949
PTPRK	6	128289924-128291425	0.0050671	0.0212757	0.556359	0.00352571	-0.0653134	-0.0822175	0.00130314	1.3478e-06	0.0372234	-0.124651	0.00694648	0.0795717	0.0979523	0.258829	3.38944e-18	0.258631	protein_coding	-	ENSG00000152894
PVRL1	11	119531702-119536007	-0.0338691	-0.00386929	3.64992e-05	0.633061	0.0970167	0.0362445	3.69715e-07	0.0518612	0.227578	0.148851	-0.0602751	-0.043322	1.03784e-06	0.338043	0.349559	0.047515	protein_coding	-	ENSG00000110400
PYCR1	17	79890269-79891252	0.0156924	0.0387939	0.0751566	6.28093e-06	-0.0735817	-0.0818115	0.00032292	3.12541e-05	-0.0447714	0.0369264	0.0819045	0.0406638	0.606792	0.218793	0.330282	0	protein_coding	-	ENSG00000183010
PYGM	11	64520991-64521154	0.0168685	0.0136993	0.035772	0.115045	-0.0153956	-0.0062799	0.409495	0.750576	0.0590142	0.216961	0.153213	0.220996	0.00019074	6.47063e-06	0.223964	0.0477164	protein_coding	-	ENSG00000068976
RAB3C	5	58146991-58155213	-0.0458301	-0.0104558	1.14787e-07	0.213387	0.0874602	0.0317514	1.76871e-05	0.0997527	-0.103033	-0.10038	0.0463156	0.0266486	0.0363804	0.584101	0.400421	0.13064	protein_coding	+	ENSG00000152932
RALGPS1	9	129981019-129985445	0.0446055	-0.00374302	6.14929e-07	0.662888	-0.0678571	-0.00696703	0.00111622	0.724008	0.0299864	-0.0218749	0.125072	0.0553626	0.82129	0.0365337	0.104696	0.115954	protein_coding	+	ENSG00000136828
RAPGEF1	9	134452157-134455034	0.037698	0.0174937	6.45849e-06	0.0333491	-0.0642002	0.0097341	0.000961894	0.605378	0.0377372	0.0576892	0.142483	0.138514	0.435257	0.000690088	0.274772	0.37693	protein_coding	-	ENSG00000107263
RAPGEF1	9	134457992-134458089	0.0483678	0.00804222	9.64982e-09	0.286381	-0.0264428	0.0159826	0.165559	0.353721	-0.0183097	-0.0938938	0.038888	-0.104725	0.228848	0.094716	0.0516233	1.4074e-07	protein_coding	-	ENSG00000107263
RAPGEF1	9	134459698-134459799	0.0429943	0.016986	8.90987e-07	0.0286614	-0.0250496	0.00962837	0.209413	0.585161	0.0706513	-0.0812159	0.133927	-0.0681263	0.175439	0.012042	0.0911195	0.00996598	protein_coding	-	ENSG00000107263
RAPGEF1	9	134518626-134518804	0.040361	0.014723	3.54006e-06	0.0539653	-0.0290721	0.0181624	0.14307	0.296398	0.0440922	-0.0399915	0.12709	-0.0953724	0.577549	0.00732093	0.0899147	0	protein_coding	-	ENSG00000107263
RAPGEF1	9	134585007-134585229	0.0510652	NA	1.90175e-08	NA	-0.049483	NA	0.0177102	NA	0.0112834	-0.0114432	NA	NA	0.96519	NA	3.69714e-07	NA	protein_coding	-	ENSG00000107263
RAPGEF3	12	48128455-48131468	0.0556648	0.0162328	5.57159e-11	0.0783386	-0.10501	-0.0825049	1.06646e-07	0.00012325	-0.0167968	-0.015361	-0.0260785	0.150903	0.912359	0.0566294	0.105558	0	protein_coding	-	ENSG00000079337
RAPGEF3	12	48131805-48131876	0.0454818	0.0211867	7.94534e-08	0.0240716	-0.0693897	-0.0549643	0.000363695	0.0109602	0.00997218	-0.0341447	-0.0287749	0.172411	0.825291	0.0251381	0.144971	0.355156	protein_coding	-	ENSG00000079337
RAPGEF3	12	48132473-48132537	0.0145378	0.00970982	0.0966134	0.296597	-0.0937087	-0.0198515	4.39025e-06	0.349697	-0.0751303	0.0357044	0.00190073	0.134462	0.331455	0.0978333	0.422466	0.191574	protein_coding	-	ENSG00000079337
RAPGEF3	12	48132926-48133974	0.056697	0.0168502	1.68937e-10	0.0578538	-0.09929	-0.0707645	1.44359e-06	0.000605868	0.0964663	0.0457054	0.0765029	0.228961	0.154289	0.000244647	0.380126	4.27453e-11	protein_coding	-	ENSG00000079337
RAPGEF3	12	48134088-48134178	0.0495406	0.0209132	4.56982e-09	0.0250621	-0.0857776	-0.0426206	1.06834e-05	0.0466917	0.00640709	0.00889929	-0.0731178	0.153193	0.979122	0.0312194	0.224283	1.04874e-08	protein_coding	-	ENSG00000079337
RAPGEF3	12	48134425-48134606	0.057557	0.0185856	1.79945e-11	0.039713	-0.0785673	-0.0823838	6.99053e-05	8.57721e-05	0.0374318	0.00442598	-0.0740076	0.172924	0.77448	0.0113392	0.263807	0.166409	protein_coding	-	ENSG00000079337
RAPGEF3	12	48134698-48134823	0.0527906	0.0132859	8.53482e-10	0.157157	-0.0894402	-0.0787191	7.49383e-06	0.000323187	0.0155102	-0.0244649	-0.033701	0.133544	0.881662	0.112046	0.399712	0.0629629	protein_coding	-	ENSG00000079337
RAPGEF3	12	48135288-48136075	0.061025	0.0268121	1.90525e-11	0.00475912	-0.0905885	-0.0709192	1.62354e-05	0.00123812	0.134936	-0.0169593	0.00241562	0.185467	0.0616363	0.016512	0.215403	5.28526e-19	protein_coding	-	ENSG00000079337
RAPGEF3	12	48137313-48137459	0.0520286	0.0270184	4.71754e-09	0.00397582	-0.0951399	-0.0559426	4.27588e-06	0.00954827	0.060118	-0.0305762	-0.0716572	0.15787	0.500529	0.0282842	0.304047	0	protein_coding	-	ENSG00000079337
RAPGEF3	12	48137770-48140682	0.0655359	0.0211674	4.40092e-13	0.0192549	-0.101762	-0.0863528	1.60791e-06	3.81143e-05	0.108934	4.61158e-05	0.107585	0.152862	0.158943	0.00540142	0.442878	0.225385	protein_coding	-	ENSG00000079337
RAPGEF3	12	48141327-48141409	0.0537611	0.0153822	3.01755e-10	0.0722279	-0.0745454	-0.0715267	0.000153733	0.00029979	0.092022	-0.00198548	-0.00549797	0.0818703	0.222147	0.372579	0.0680877	0.33864	protein_coding	-	ENSG00000079337
RAPGEF3	12	48141495-48141692	0.0584108	0.0163436	4.61897e-11	0.0636314	-0.0721857	-0.0634415	0.000458806	0.00181077	0.0791289	0.0118901	0.00228818	0.0732628	0.34861	0.471628	0.546945	0.189535	protein_coding	-	ENSG00000079337
RAPGEF3	12	48141857-48141935	0.0506602	0.0198538	2.12916e-08	0.0288255	-0.0654357	-0.0641333	0.00183949	0.0022077	0.0674697	0.00853453	-0.0175725	0.055975	0.476824	0.6434	0.546033	0.234121	protein_coding	-	ENSG00000079337
RAPGEF3	12	48142237-48143319	0.0573682	0.0203928	2.18897e-10	0.0314868	-0.0933591	-0.0709963	1.10309e-05	0.00121318	0.0866461	0.0116621	0.0316565	0.115501	0.301956	0.169009	0.680004	0.192201	protein_coding	-	ENSG00000079337
RAPGEF3	12	48143524-48143600	0.0563504	0.0166766	4.62895e-10	0.0610134	-0.0719864	-0.0736444	0.000576261	0.000296009	0.111924	0.0177034	0.0171939	0.0475624	0.125668	0.685929	0.914277	0.133724	protein_coding	-	ENSG00000079337
RAPGEF3	12	48143713-48143773	0.0555014	0.0105857	1.25895e-09	0.235734	-0.0623998	-0.0701625	0.00294292	0.000635259	0.124623	-0.0148408	0.0380647	-0.0254497	0.084979	0.738451	0.480854	0.0252842	protein_coding	-	ENSG00000079337
RAPGEF3	12	48144124-48144208	0.0479008	0.0183585	2.75892e-07	0.0559527	-0.0630606	-0.0681565	0.00355583	0.00205626	0.119284	-0.0487547	-0.00606758	-0.00439429	0.0982222	0.992245	0.293598	1.72161e-09	protein_coding	-	ENSG00000079337
RAPGEF3	12	48144831-48144999	0.057521	0.0250822	5.47033e-10	0.00448849	-0.0852495	-0.0464286	7.74607e-05	0.0211686	0.0500582	-0.0384066	0.0148879	0.0379149	0.587441	0.775821	0.248831	0.301801	protein_coding	-	ENSG00000079337
RAPGEF3	12	48145182-48145303	0.0602238	0.0271212	2.34039e-11	0.00204481	-0.0685856	-0.0299537	0.000832603	0.134217	0.113682	0.00545747	0.0806174	0.0500006	0.11312	0.21782	0.42183	0.254527	protein_coding	-	ENSG00000079337
RAPGEF3	12	48145506-48145612	0.0579018	0.0222994	7.49685e-11	0.0112848	-0.0684962	-0.0449614	0.00077244	0.025004	0.112056	-0.0441438	0.130557	0.118143	0.0999959	0.00603398	0.289748	0.206167	protein_coding	-	ENSG00000079337
RAPGEF3	12	48145699-48145752	0.0462411	0.0103107	4.16553e-07	0.254032	-0.0554234	-0.0635316	0.00787115	0.00208889	0.0490789	0.0338325	0.0898855	0.0477102	0.560664	0.188742	0.364511	2.42799e-14	protein_coding	-	ENSG00000079337
RAPGEF3	12	48151649-48151970	0.057296	0.0300785	2.12696e-10	0.000342493	-0.058052	-0.0561647	0.00501932	0.0033261	0.0921045	0.0248859	0.0481926	0.0216805	0.224367	0.597563	0.619283	2.72563e-09	protein_coding	-	ENSG00000079337
RAPGEF3	12	48152334-48152861	0.0501269	0.0244	3.26685e-08	0.00548702	-0.051615	-0.0648159	0.0131105	0.0012628	0.117184	-0.0346921	0.057668	-0.00359488	0.100885	0.573596	0.456332	0.21898	protein_coding	-	ENSG00000079337
RASAL2	1	178442210-178448644	0.0532645	0.0134616	2.88956e-11	0.0300948	-0.108369	-0.0191917	9.56894e-09	0.180409	-0.0365961	-0.0933421	0.0611042	-0.0234961	0.166741	0.26839	8.07351e-09	0.266901	protein_coding	+	ENSG00000075391
RBM23	14	23369854-23371092	-0.0412164	-0.0128844	2.46214e-06	0.102817	-0.000137529	-0.0330099	0.994508	0.0691518	0.103793	0.0437484	0.0561254	0.177995	0.118871	0.00192236	0.154211	0.705297	protein_coding	-	ENSG00000100461
RBM23	14	23374794-23375577	-0.0123396	-0.00676812	0.182292	0.445566	0.014835	-0.00526198	0.487966	0.794669	0.219104	-0.0510143	0.243558	0.107735	0.000659499	7.95623e-06	0.285336	0.0180098	protein_coding	-	ENSG00000100461
RBM24	6	17291987-17294106	-0.0103183	0.00881257	0.257014	0.278179	0.00654308	-0.0281478	0.757721	0.128532	0.107782	0.206767	0.174678	0.183891	0.000474083	4.74839e-06	5.17207e-16	0.0331207	protein_coding	+	ENSG00000112183
RBMX	X	135951351-135952576	-0.0391993	-0.0272064	3.36151e-06	0.000399911	0.0294723	-0.0110246	0.128027	0.530786	0.0452218	0.0752446	0.052425	0.0331987	0.280885	0.429501	0	0	protein_coding	-	ENSG00000147274
RBPMS	8	30415698-30416473	-0.036091	-0.00532639	8.23148e-05	0.53392	0.104221	-0.0153469	1.51308e-06	0.433879	0.0530323	-0.0284769	0.162661	0.196582	0.60991	1.75975e-05	0.268392	0.218226	protein_coding	+	ENSG00000157110
RBPMS	8	30421567-30423877	-0.0373343	-0.00492344	3.24306e-05	0.561739	0.0827298	-0.0165536	7.94902e-05	0.397177	-0.025711	-0.0407034	0.227684	0.181604	0.708613	4.60328e-07	0.230576	0.365046	protein_coding	+	ENSG00000157110
RCE1	11	66612637-66614017	-0.00316419	-0.00719311	0.715027	0.356817	0.0248885	-0.0387913	0.212433	0.0316974	0.18308	0.197923	0.020395	0.143471	5.43845e-06	0.0226301	0	1.82303e-11	protein_coding	+	ENSG00000173653
RFX1	19	14072343-14073676	0.00567685	0.0378361	0.458011	3.3856e-06	-0.0124599	-0.0445091	0.48098	0.0156824	0.0568293	0.168064	-0.00127362	0.183227	0.00242416	0.00355573	2.95872e-13	0.0516389	protein_coding	-	ENSG00000132005
RFX1	19	14083555-14083939	0.0107139	0.0395378	0.197936	4.01413e-06	-0.0138114	-0.00213904	0.469901	0.911933	0.0507441	0.119045	0.098498	0.0973824	0.0606097	0.0336799	7.3842e-09	0	protein_coding	-	ENSG00000132005
RFX2	19	5993175-5994961	0.0170837	0.0437569	0.0599159	2.01191e-06	-0.0648708	-0.101846	0.00201744	1.60083e-06	0.0454722	0.134672	-0.0255789	0.130261	0.0567018	0.102759	0.2202	7.56053e-13	protein_coding	-	ENSG00000087903
RFX2	19	6001826-6002034	0.0299374	0.0493999	0.000746755	2.06479e-07	-0.0140777	-0.0513004	0.485884	0.0179192	0.00734628	0.135617	0.0356862	0.0877386	0.0721559	0.29834	0	0	protein_coding	-	ENSG00000087903
RFX2	19	6002732-6002881	0.0237488	0.0423014	0.00840262	8.10491e-06	-0.0355477	-0.0672278	0.0846198	0.00191036	0.000361379	0.0812337	0.00961893	0.0409778	0.399147	0.791056	0.134016	0	protein_coding	-	ENSG00000087903
RFX2	19	6007023-6007177	0.0149117	0.0240575	0.0950894	0.00999996	-0.0395556	-0.100645	0.0538033	3.51545e-06	0.0399276	0.155943	0.0365662	0.0931868	0.0227537	0.25228	0	1.09923e-08	protein_coding	-	ENSG00000087903
RHOBTB1	10	62629196-62631425	-0.0285334	-0.0134047	0.00116301	0.118446	0.100148	-0.0266753	1.05906e-06	0.180068	0.113406	0.0330461	0.0802852	0.00479637	0.0972839	0.333467	0.128491	0.107409	protein_coding	-	ENSG00000072422
RIN2	20	19867165-19867424	0.0463922	NA	1.49154e-07	NA	-0.0571139	NA	0.00480366	NA	0.0720496	0.00436818	NA	NA	0.415109	NA	0.0311851	NA	protein_coding	+	ENSG00000132669
RNA5SP216	6	126300958-126301080	-0.0036337	-0.0186859	0.653671	0.0180833	-0.0154538	0.00253894	0.405993	0.887482	0.151464	-0.219036	0.162376	0.0386361	7.96923e-06	0.00275836	3.91028e-13	3.59206e-13	rRNA	-	ENSG00000251920
RNA5SP352	11	124506355-124506488	-0.00600602	-0.00300787	0.463554	0.737525	0.0144492	-0.0168822	0.443545	0.408322	0.233465	-0.218961	0.0949685	0.00247847	8.68936e-08	0.229763	0	2.4584e-15	rRNA	+	ENSG00000200278
RNF216P1	7	5036241-5037800	-0.0459498	-0.0141416	4.86097e-07	0.123027	-0.0135953	-0.0249104	0.521221	0.244379	0.030939	0.0272395	0.0392699	0.0972557	0.780394	0.231936	0.448743	0.158948	pseudogene	+	ENSG00000196204
RP1-13P20.6	1	152921462-152921686	NA	-0.00504812	NA	0.555157	NA	0.0323925	NA	0.104494	NA	NA	-0.122884	-0.252171	NA	5.71077e-06	NA	4.43894e-11	antisense	-	ENSG00000224308
RP1-197B17.3	12	48133326-48136077	0.0632008	0.0193424	5.08038e-13	0.0362114	-0.0966032	-0.0836224	1.88115e-06	0.000102574	0.0723094	0.00973309	0.000320905	0.184567	0.400369	0.0144949	0.373793	2.0483e-08	lincRNA	+	ENSG00000257433
RP1-40G4P.1	22	27282872-27283279	0.00224359	0.00907498	0.77197	0.234198	0.007544	-0.00616317	0.671039	0.725328	0.18708	0.195365	-0.0792363	-0.0501942	3.89149e-07	0.141088	0.0560532	0.0977575	pseudogene	-	ENSG00000231369
RP1-40G4P.1	22	27283342-27283511	0.00117187	0.00449525	0.879036	0.554279	-0.0288986	0.00648089	0.10238	0.710614	0.155693	0.193029	-0.0561589	-0.0451996	3.45959e-06	0.317324	0.0622747	0.096248	pseudogene	-	ENSG00000231369
RP11-100L22.1	8	93691037-93691822	0.0414491	NA	2.50569e-06	NA	-0.0218733	NA	0.272703	NA	0.0443372	-0.0692531	NA	NA	0.371424	NA	0.261939	NA	lincRNA	+	ENSG00000253177
RP11-124O11.1	10	43367957-43369508	0.0386121	NA	9.51741e-06	NA	0.0163462	NA	0.408637	NA	0.0117974	0.0654102	NA	NA	0.501818	NA	4.84352e-17	NA	lincRNA	+	ENSG00000234944
RP11-155G14.6	7	128106617-128106739	0.0419293	NA	3.47107e-06	NA	-0.0119148	NA	0.566255	NA	-0.134763	-0.0877301	NA	NA	0.0174675	NA	0.189259	NA	processed_transcript	+	ENSG00000240758
RP11-175O19.4	10	98752207-98755716	-0.0124463	-0.0136994	0.155929	0.0914172	-0.00689985	-0.00820801	0.734767	0.659391	0.0604547	-0.0959211	0.190344	0.280408	0.166493	1.98956e-09	0.359279	0	antisense	+	ENSG00000231025
RP11-20J15.3	10	44787706-44788182	-0.0484604	-0.0360201	1.30723e-08	8.15606e-05	0.0500356	0.0615156	0.0103013	0.00321274	-0.0907404	-0.0716152	0.0685521	0.100761	0.0905279	0.104328	0.241707	0.0832491	antisense	-	ENSG00000229116
RP11-20J15.3	10	44788720-44789157	-0.0432556	NA	2.98662e-07	NA	0.0475894	NA	0.0139537	NA	0.0198937	-0.0864996	NA	NA	0.296148	NA	0.47807	NA	antisense	-	ENSG00000229116
RP11-218E20.3	14	51423044-51427333	-0.0417961	NA	2.13252e-06	NA	0.0627085	NA	0.00229485	NA	-0.0889866	-0.0108207	NA	NA	0.267051	NA	0.224893	NA	lincRNA	-	ENSG00000258711
RP11-228B15.4	9	130580398-130580668	-0.0133435	-0.0122061	0.098341	0.172574	0.0852073	0.0483671	6.85115e-06	0.0193883	0.104719	-0.0430786	0.0131996	-0.0294576	0.0954097	0.872827	0.16107	0.0482907	antisense	+	ENSG00000225032
RP11-295P9.3	10	13686917-13687279	0.0635132	-0.0065889	1.02141e-14	0.464016	-0.0610365	0.0196114	0.00103443	0.345106	0.0872984	-0.0455498	0.0393062	0.0443427	0.1681	0.579653	0.310032	0.421276	protein_coding	+	ENSG00000239665
RP11-367J11.2	4	7032281-7035780	0.0201812	-0.000556439	0.0286866	0.943714	-0.00679357	-0.0166079	0.750477	0.358849	-0.0381795	-0.0138629	0.0748774	0.246618	0.776095	4.87814e-06	0.424332	2.32786e-08	antisense	-	ENSG00000245748
RP11-433J22.2	1	147229426-147229879	-0.0269865	0.0079357	0.00309726	0.405304	0.102745	0.0345036	1.75895e-06	0.113347	0.132293	-0.10306	0.113394	0.0217865	0.0218323	0.145544	0.343308	7.2803e-10	antisense	+	ENSG00000234482
RP11-545A16.3	1	179555840-179558312	0.0238206	0.0132245	0.00779032	0.122863	-0.0934972	-0.0349033	7.36809e-06	0.0734839	-0.0321053	-0.0811023	0.0165187	-0.060108	0.332329	0.55892	0	0	pseudogene	+	ENSG00000227141
RP11-649E7.5	14	50087964-50090198	-0.0510963	-0.0184381	6.57483e-09	0.0212575	0.0648075	-0.0035698	0.00165736	0.845177	0.103324	-0.0278081	0.0871186	0.0164972	0.171462	0.205108	0.238466	0.159805	antisense	-	ENSG00000258377
RP11-830F9.6	16	89016665-89017932	0.045561	0.00104296	4.07439e-07	0.913952	-0.0458938	-0.0440716	0.0254795	0.0463266	0.0211277	0.0240644	-0.0262036	-0.0175904	0.851543	0.869722	0.415129	3.7889e-11	protein_coding	+	ENSG00000205018
RP11-889L3.1	5	177482605-177483195	-0.00505435	-0.00857747	0.552521	0.245044	-0.0172939	-0.0038938	0.376777	0.816663	-0.0606412	0.0338819	-0.24934	0.00572689	0.448488	5.13299e-07	0.322133	0.425353	pseudogene	+	ENSG00000218227
RP13-279N23.2	1	19235033-19235160	0.0417338	0.0253757	8.58144e-06	0.00394386	0.0326149	-0.0585892	0.12842	0.00357741	0.0649958	0.0158808	-0.0935405	-0.042299	0.509124	0.163731	0.21356	2.58362e-16	protein_coding	-	ENSG00000255275
RP13-279N23.2	1	19236836-19236966	0.0418409	0.0279913	5.26299e-06	0.000997575	-0.00329955	-0.0561107	0.875133	0.00387777	0.0438252	-0.0502268	-0.0724385	-0.0901618	0.550966	0.0956716	0.0852609	0	protein_coding	-	ENSG00000255275
RP13-279N23.2	1	19237878-19237970	0.0413969	0.0307021	4.11428e-06	0.00036808	-0.0145527	-0.0470143	0.478907	0.0170079	0.043278	0.0321422	-0.0467028	-0.0541086	0.624308	0.416276	0.437545	0	protein_coding	-	ENSG00000255275
RP13-279N23.2	1	19238457-19238577	0.0420561	0.0278485	2.46476e-06	0.00113315	-0.0245274	-0.0356292	0.227046	0.0671837	0.098944	0.0049168	-0.0556896	-0.065837	0.194867	0.272056	0.303133	2.83123e-10	protein_coding	-	ENSG00000255275
RP13-279N23.2	1	19243397-19243536	0.0417792	0.027077	9.67597e-07	0.00123274	-0.0336268	-0.0282302	0.082579	0.137859	0.135029	-0.00253077	-0.0182204	-0.0748573	0.0376585	0.368722	0.302913	4.32932e-11	protein_coding	-	ENSG00000255275
RP3-467L1.4	1	7870302-7870776	0.0423702	0.0331029	4.14496e-07	2.99487e-05	-0.0733484	-0.101402	0.000120397	3.50883e-08	-0.0357576	0.00210464	-0.0379249	-0.00245221	0.780465	0.737444	0.12228	0.521562	antisense	-	ENSG00000236266
RP3-467L1.4	1	7887164-7887402	0.0575574	0.0373748	1.40827e-11	2.68066e-08	-0.0649325	-0.0432919	0.000814641	0.00436668	-0.0137242	-0.0503516	0.0303941	-0.103966	0.655479	0.054699	2.29578e-11	0.361493	antisense	-	ENSG00000236266
RP4-798P15.3	1	177897923-177899064	0.0393695	-0.00871458	7.41631e-06	0.290975	-0.0557402	-0.0554971	0.00577805	0.00378348	-0.0869835	-0.00132209	0.103935	-0.00620578	0.281292	0.142298	0.206533	5.50534e-12	processed_transcript	-	ENSG00000254154
RP5-966M1.6	3	52869805-52874278	-0.035349	-0.0203284	8.64155e-05	0.023796	0.0813967	0.0241314	0.000108497	0.238049	0.140739	0.0857819	0.297836	0.0426888	0.0151063	6.35316e-07	0.293999	0	protein_coding	-	ENSG00000243696
RPL37	5	40833981-40834367	-0.00961983	-0.00714175	0.28436	0.373395	-0.0178233	-0.000191869	0.386282	0.991621	-0.0283779	0.0417229	-0.246952	-0.0196034	0.704589	5.11107e-06	0	0.155153	protein_coding	-	ENSG00000145592
RPL37	5	40834573-40834709	-0.00664154	-0.00798427	0.435206	0.276915	-0.0221331	0.00210576	0.257102	0.899712	0.000364503	0.0411689	-0.227164	-0.0272045	0.770983	3.56675e-06	0.189048	0.280853	protein_coding	-	ENSG00000145592
RPL4	15	66792631-66792714	0.000888997	-0.00809479	0.922048	0.332484	-0.0175816	0.012137	0.405252	0.523921	0.103951	-0.00246731	-0.260877	0.0156319	0.19409	4.92121e-06	0.115311	0.150297	protein_coding	-	ENSG00000174444
RPS6	9	19376492-19376837	-0.00461744	-0.0131615	0.580838	0.0762838	-0.0143371	-0.00704849	0.456014	0.676956	-0.057309	0.0622656	-0.228299	0.0548309	0.312067	6.223e-06	0.361787	0.148761	protein_coding	-	ENSG00000137154
RPS6	9	19378366-19378512	-0.00232816	-0.0188354	0.795091	0.0272607	-0.00624149	-0.0106435	0.761851	0.585974	-0.0256583	0.0223417	-0.268932	0.105633	0.845622	1.8336e-06	0.379816	0.146327	protein_coding	-	ENSG00000137154
RUSC2	9	35555057-35555698	0.0308449	0.00683733	0.000263228	0.387572	-0.00695595	0.0071817	0.721219	0.690437	0.171326	0.0154875	0.224788	0.118301	0.00527945	1.80427e-06	0.0774104	0.129434	protein_coding	+	ENSG00000198853
S1PR3	9	91611421-91619925	-0.0209805	0.0151396	0.0288046	0.0490734	0.035635	-0.00548551	0.113618	0.755404	-0.00398371	-0.000910239	0.188653	0.14523	0.997735	5.96868e-06	0	0.516435	protein_coding	+	ENSG00000213694
SAFB2	19	5590289-5590419	-0.00729444	-0.00663959	0.308885	0.427337	0.0744181	0.0271579	8.81919e-06	0.157646	0.0354379	0.118191	-0.0338188	0.0654814	0.0359179	0.436378	2.34267e-13	0.454808	protein_coding	-	ENSG00000130254
SAT1	X	23802870-23803677	-0.0463079	-0.0187835	2.32046e-07	0.0222614	0.0283495	-0.0053864	0.170316	0.775623	0.0143463	-0.0506463	0.118366	0.0668061	0.689733	0.0293753	0.48795	8.64884e-10	protein_coding	+	ENSG00000130066
SBSN	19	36015613-36015657	NA	-0.0180637	NA	0.006565	NA	0.0167975	NA	0.271746	NA	NA	-0.116473	-0.174647	NA	8.08661e-06	NA	0.483497	protein_coding	-	ENSG00000189001
SCAMP4	19	1921224-1921817	0.00493887	0.00273633	0.571631	0.758653	0.0505469	0.00536533	0.0118125	0.792155	0.0594516	0.108364	0.232655	0.191157	0.0874702	5.48167e-07	0	0.251859	protein_coding	+	ENSG00000227500
SCARB1	12	125267229-125271049	0.0470937	0.00276722	6.54348e-08	0.723048	-0.0211485	0.00409872	0.295306	0.817635	0.056087	-0.0769047	0.169596	0.0557469	0.273346	0.00109885	0.38993	0.139649	protein_coding	-	ENSG00000073060
SCN4A	17	62015914-62019353	0.0591882	0.0305794	8.61045e-12	0.00123931	-0.0755618	-0.0175057	0.000181727	0.417681	0.14785	0.0827142	0.130585	0.247752	0.00754583	3.2063e-05	0.670746	2.48503e-09	protein_coding	-	ENSG00000007314
SCN4A	17	62020186-62020456	0.0536139	NA	2.01767e-09	NA	-0.0578482	NA	0.00534114	NA	0.133149	0.0374931	NA	NA	0.0467007	NA	0.360614	NA	protein_coding	-	ENSG00000007314
SCN4A	17	62021106-62021210	0.0528809	NA	1.12649e-09	NA	-0.0725616	NA	0.000289202	NA	0.107679	0.0404864	NA	NA	0.0995173	NA	0.507613	NA	protein_coding	-	ENSG00000007314
SCN4A	17	62022033-62022170	0.0512801	NA	8.3132e-09	NA	-0.0403624	NA	0.04745	NA	0.109357	0.115173	NA	NA	0.0180774	NA	0	NA	protein_coding	-	ENSG00000007314
SCN4A	17	62022720-62022998	0.0497739	NA	2.60251e-08	NA	-0.0440285	NA	0.0334059	NA	0.182305	0.0843487	NA	NA	0.00163333	NA	0.0904704	NA	protein_coding	-	ENSG00000007314
SCN4A	17	62024405-62024527	0.0522514	NA	1.69753e-09	NA	-0.0418266	NA	0.0360517	NA	0.137646	0.0332355	NA	NA	0.0317601	NA	3.86978e-09	NA	protein_coding	-	ENSG00000007314
SCN4A	17	62025250-62025423	0.0511432	NA	4.11911e-09	NA	-0.0461528	NA	0.0202697	NA	0.09103	0.0458672	NA	NA	0.160723	NA	0.312438	NA	protein_coding	-	ENSG00000007314
SCN4A	17	62025971-62026125	0.0488664	NA	4.28737e-08	NA	-0.0279948	NA	0.170599	NA	0.143102	-0.0105952	NA	NA	0.0351548	NA	0.260586	NA	protein_coding	-	ENSG00000007314
SCN4A	17	62026753-62026888	0.0500887	NA	8.25524e-09	NA	-0.035752	NA	0.0738936	NA	0.108571	-0.0356133	NA	NA	0.120071	NA	0.0973961	NA	protein_coding	-	ENSG00000007314
SCN4A	17	62028784-62029260	0.0513704	NA	5.69846e-11	NA	-0.0322932	NA	0.0712296	NA	0.159509	0.0511243	NA	NA	0.00248625	NA	0.528485	NA	protein_coding	-	ENSG00000007314
SCN4A	17	62034522-62034878	0.0500347	NA	1.76927e-09	NA	-0.0219078	NA	0.246308	NA	0.154345	0.0908781	NA	NA	0.00234826	NA	0.303772	NA	protein_coding	-	ENSG00000007314
SCN4A	17	62036625-62036798	0.0428081	NA	2.64934e-07	NA	-0.0226283	NA	0.235244	NA	0.142895	-0.0302779	NA	NA	0.0204741	NA	0.11493	NA	protein_coding	-	ENSG00000007314
SCN4A	17	62038553-62038791	0.0454102	NA	4.72564e-08	NA	-0.035886	NA	0.0605685	NA	0.142701	-0.0297979	NA	NA	0.0208901	NA	0.452651	NA	protein_coding	-	ENSG00000007314
SDCBP2	20	1290619-1291139	-0.0378879	-0.024697	6.42092e-06	0.000249528	0.062179	0.0273804	0.00130441	0.0750882	-0.0602187	0.0681839	-0.0676493	0.0278988	0.265024	0.243031	0.191813	1.79312e-15	protein_coding	-	ENSG00000125775
SEMA4B	15	90771136-90772911	0.0390334	-0.00968836	8.9204e-06	0.288299	-0.0671644	0.00784488	0.00107856	0.712043	0.0637662	0.0243812	0.000232462	0.114833	0.461036	0.185867	0.462832	0.570095	protein_coding	+	ENSG00000185033
SEMA6B	19	4542600-4544541	-0.0406225	0.00447147	1.74398e-08	0.574125	0.058806	-0.00224097	0.000411125	0.902841	0.10768	0.019732	-0.0015294	0.0800175	0.0500508	0.334059	0.0154454	0.1259	protein_coding	-	ENSG00000167680
SEMA6B	19	4546404-4546481	-0.0295663	0.0125345	4.22344e-05	0.128727	0.0890898	0.0487152	1.09555e-07	0.010061	0.0728003	0.0370907	-0.0335039	0.006799	0.188622	0.809683	0.208739	0	protein_coding	-	ENSG00000167680
SEMA6B	19	4552434-4552651	-0.0357211	0.00128581	9.708e-06	0.884761	0.0801032	0.0309355	1.67587e-05	0.128761	0.137545	0.0105657	0.0690864	-0.0474935	0.0205745	0.361533	0	1.13451e-10	protein_coding	-	ENSG00000167680
SEPT11	4	77960226-77960479	-0.0453359	NA	6.46931e-07	NA	0.0351919	NA	0.0892498	NA	-0.0723521	-0.0648776	NA	NA	0.219254	NA	1.93982e-10	NA	protein_coding	+	ENSG00000138758
SERPINE1	7	100780686-100782547	0.0115623	0.0132037	0.170502	0.163643	-0.0535911	-0.106175	0.00686537	1.54389e-06	-0.0484228	-0.0904464	0.0815683	0.0771711	0.178703	0.167862	0.100607	0.530394	protein_coding	+	ENSG00000106366
SFXN3	10	102790991-102791291	0.000972034	-0.00872173	0.916251	0.362882	-0.00769017	0.0351641	0.719839	0.108892	-0.00257057	0.0225903	0.284244	0.038395	0.937686	9.31205e-06	5.50446e-11	0.396044	protein_coding	+	ENSG00000107819
SH3RF3	2	110259080-110262207	-0.039203	-0.0118347	6.77304e-06	0.206108	0.0282193	0.0195772	0.161514	0.361638	-0.0145407	-0.12724	0.0924993	-0.0267102	0.0904919	0.277365	0.351016	0.421779	protein_coding	+	ENSG00000172985
SH3TC2	5	148380911-148384465	0.04731	0.00947339	2.91113e-07	0.272173	-0.0400887	-0.0278282	0.0601043	0.159314	-0.0214636	0.00424035	0.0672075	0.0958206	0.93101	0.100844	0.272895	0.431555	protein_coding	-	ENSG00000169247
SH3TC2	5	148405341-148408281	0.0492514	0.0164169	1.62554e-07	0.0371609	-0.0292115	-0.0267468	0.17333	0.137444	0.0487906	-0.0402652	0.0698028	0.0180959	0.590185	0.330182	0.175166	0.381071	protein_coding	-	ENSG00000169247
SIAH1	16	48399298-48399812	-0.0416972	NA	3.1179e-06	NA	0.0508677	NA	0.0133432	NA	-0.112674	-0.0549739	NA	NA	0.0740386	NA	0.487875	NA	protein_coding	-	ENSG00000196470
SIAH2	3	150458914-150460485	-0.0444183	-0.00701208	7.48475e-07	0.388222	0.0485061	0.0195752	0.0198229	0.296505	0.18626	0.0713561	0.0680726	0.0304553	0.00235594	0.344658	0.271437	0.188722	protein_coding	-	ENSG00000181788
SIM1	6	100832891-100838967	-0.0403132	NA	5.20312e-06	NA	0.0144756	NA	0.48536	NA	0.0269037	0.0599551	NA	NA	0.53322	NA	0.409211	NA	protein_coding	-	ENSG00000112246
SIN3B	19	16973695-16973790	0.0371338	-0.00336068	8.15486e-06	0.704629	0.0349358	-0.0236218	0.0641533	0.243616	-0.0194731	-0.014606	0.037466	0.00750983	0.889897	0.783777	1.65943e-16	0	protein_coding	+	ENSG00000127511
SKI	1	2160134-2161174	0.0483579	0.0188106	5.80425e-13	0.0025641	-0.00773172	0.0102885	0.608785	0.467258	-0.0176987	-0.0106378	0.0608037	-0.101582	0.881478	0.0203267	0.398091	9.37278e-11	protein_coding	+	ENSG00000157933
SKI	1	2234417-2234542	0.0443878	0.0155078	1.2757e-09	0.0141821	-0.0340293	0.00878904	0.0412674	0.540677	0.0187141	-0.0433777	0.0653593	-0.0965236	0.628839	0.0251013	0.342894	3.47376e-08	protein_coding	+	ENSG00000157933
SKI	1	2234724-2234839	0.0458232	0.017068	6.14145e-10	0.00922251	-0.0292837	0.00358813	0.0834688	0.809554	0.0138574	-0.0521729	0.0559829	-0.0783723	0.557013	0.0952016	0.61725	0.0604711	protein_coding	+	ENSG00000157933
SKI	1	2235085-2235547	0.0439257	0.0177414	2.51282e-09	0.00641012	-0.0293267	0.00789479	0.0805114	0.593097	-0.00157385	-0.0527554	0.0849766	-0.0713095	0.565882	0.037612	0.294299	4.03803e-09	protein_coding	+	ENSG00000157933
SKI	1	2235732-2236024	0.0477411	0.0198563	4.62035e-10	0.00406702	-0.0385308	0.00397084	0.0278351	0.800295	0.0206016	-0.040312	0.0708309	-0.0699181	0.679918	0.0980898	0.458453	0	protein_coding	+	ENSG00000157933
SKI	1	2237459-2237689	0.045984	0.0173753	6.93322e-10	0.0075149	-0.0238629	0.00910912	0.158922	0.53824	-0.019929	-0.0313647	0.0720586	-0.0720961	0.739729	0.0646045	0.285364	2.40635e-12	protein_coding	+	ENSG00000157933
SKI	1	2238016-2241558	0.0601342	0.0275893	2.62812e-12	0.000496664	-0.0785405	-0.0167521	7.52973e-05	0.352963	0.0419475	-0.013653	0.0677072	-0.0760541	0.720523	0.161925	0.358378	0.0316652	protein_coding	+	ENSG00000157933
SLC1A3	5	36606457-36606837	0.0471156	NA	1.40204e-08	NA	-0.0144872	NA	0.440961	NA	0.0844381	-0.0420473	NA	NA	0.199462	NA	1.59873e-14	NA	protein_coding	+	ENSG00000079215
SLC1A3	5	36629552-36629690	0.0385133	NA	4.90678e-06	NA	-0.0368735	NA	0.0560001	NA	0.0711088	-0.0326753	NA	NA	0.346145	NA	0.215921	NA	protein_coding	+	ENSG00000079215
SLC1A3	5	36671131-36671336	0.0390879	-0.016285	2.32951e-06	0.0345856	-0.0185828	-0.00850181	0.329376	0.628365	0.0521075	-0.0264247	0.0441034	-0.156454	0.548023	0.00850029	0.200149	0.491573	protein_coding	+	ENSG00000079215
SLC1A3	5	36676994-36677286	0.0388753	-0.00163441	3.02975e-06	0.836668	-0.0166154	0.0017219	0.382617	0.924165	0.0901629	0.02802	0.0255977	-0.0901322	0.18274	0.223416	0.271567	0.292567	protein_coding	+	ENSG00000079215
SLC1A3	5	36686167-36688436	0.0434883	-0.00860819	1.29885e-07	0.303582	-0.0289008	-0.0238789	0.127741	0.22029	0.0886833	0.0801077	-0.00735046	0.104866	0.0705291	0.185859	0.49828	0.183399	protein_coding	+	ENSG00000079215
SLC20A2	8	42273993-42275485	-0.0399928	-0.0121795	3.9128e-06	0.194014	0.0487931	-0.000418549	0.0151555	0.984588	0.0412665	0.078433	-0.0302763	0.201581	0.304264	0.0071342	0.0177545	0.0899436	protein_coding	-	ENSG00000168575
SLC25A25	9	130865960-130866118	0.0423282	-0.00731342	2.79402e-06	0.432078	-0.0665631	0.00495782	0.00136132	0.81522	0.11316	0.0645835	0.113772	0.0255785	0.0647567	0.12796	0.223706	3.96142e-16	protein_coding	+	ENSG00000148339
SLC25A25	9	130868008-130868160	0.0470697	0.005557	2.08149e-07	0.555693	-0.0450409	-0.0303144	0.0292629	0.159569	0.0983705	0.0501497	0.141448	0.111198	0.140628	0.00840746	0.31142	0	protein_coding	+	ENSG00000148339
SLC25A25	9	130868429-130868536	0.0405383	0.0144043	3.7594e-06	0.123024	-0.0644919	-0.0154284	0.00123968	0.469459	-0.000294082	0.117785	0.0474098	0.168246	0.129562	0.0175053	0.0628475	0.0644648	protein_coding	+	ENSG00000148339
SLC25A25	9	130868632-130868799	0.0449575	0.00537668	3.99676e-07	0.567362	-0.0516884	-0.0276614	0.0103745	0.198574	0.164186	0.0424496	0.048952	0.11568	0.0069056	0.120032	2.46987e-09	0.134363	protein_coding	+	ENSG00000148339
SLC25A25	9	130869308-130871524	0.0461959	0.00497491	1.07796e-07	0.53866	-0.0817207	-0.0407541	4.84239e-05	0.0293528	0.125925	0.155233	0.126425	0.120119	0.00133072	0.00306261	0.450901	0.433199	protein_coding	+	ENSG00000148339
SLC29A1	6	44197326-44197528	0.00686529	0.00243806	0.454627	0.778321	0.024013	-0.00128012	0.25606	0.948234	0.0638641	0.0121277	0.272927	-0.0278945	0.519812	4.07828e-06	0.34266	0	protein_coding	+	ENSG00000112759
SLC29A1	6	44197644-44198218	-0.00263193	-0.00611748	0.779198	0.491103	0.00420957	-0.0121329	0.84603	0.549314	0.0362831	0.0275533	0.324005	0.0528946	0.737997	6.07215e-08	0.115351	2.12779e-13	protein_coding	+	ENSG00000112759
SLC36A1	5	150867544-150871942	-0.0185616	0.00398389	0.0429718	0.668777	0.0417744	-0.0110927	0.0552204	0.606607	0.0939621	-0.0718093	0.291328	-0.0262197	0.169682	7.88803e-06	4.41164e-15	0.570715	protein_coding	+	ENSG00000123643
SLC38A10	17	79225995-79226483	0.00703738	0.0376305	0.297087	4.95282e-06	0.0224249	-0.00786763	0.154601	0.674543	-0.0462399	0.0560725	0.114991	0.0422299	0.282989	0.0567751	0.211507	0.0829064	protein_coding	-	ENSG00000157637
SLC39A14	8	22275164-22275348	0.0298361	0.0143708	0.000600439	0.0393313	-0.0261397	0.00851729	0.190385	0.59101	0.100389	0.019808	0.085924	-0.220746	0.161096	4.94764e-06	0	0.0692412	protein_coding	+	ENSG00000104635
SLC40A1	2	190425305-190426917	-0.047644	-0.028704	9.10791e-08	0.000143117	0.0726277	0.0102983	0.000448701	0.549945	0.0166164	0.0328667	0.124872	0.109132	0.822068	0.00203213	0.287219	0.0454041	protein_coding	-	ENSG00000138449
SLC45A1	1	8390198-8390996	0.0467644	0.00680956	7.41403e-08	0.435343	-0.0365221	0.014974	0.0645196	0.451715	0.0454141	-0.0202445	0.0321522	-0.0162571	0.66709	0.817302	0	0	protein_coding	+	ENSG00000162426
SLC48A1	12	48149485-48150268	0.0340369	NA	5.41362e-06	NA	-0.0360632	NA	0.0369552	NA	0.000759839	0.00175239	NA	NA	0.999257	NA	0.332003	NA	protein_coding	+	ENSG00000211584
SLC48A1	12	48152361-48152443	0.041371	NA	3.0224e-06	NA	-0.0207341	NA	0.305041	NA	0.0764783	-0.0123531	NA	NA	0.36911	NA	0.463421	NA	protein_coding	+	ENSG00000211584
SLC4A2	7	150768477-150769223	0.00262029	0.010636	0.752372	0.177453	-0.00225708	0.013299	0.907054	0.462135	0.0557828	0.0490856	0.221512	0.0913337	0.372301	7.0189e-06	0.399236	0.397929	protein_coding	+	ENSG00000164889
SLC5A6	2	27423866-27424942	0.0362737	0.00804257	4.2318e-05	0.374215	-0.118687	-0.0220307	1.18923e-08	0.287845	0.088057	0.0621178	0.197537	0.108515	0.151338	0.000351726	0.21694	0.311086	protein_coding	-	ENSG00000138074
SLC5A6	2	27425681-27426213	0.0389587	0.00643782	7.84738e-06	0.488729	-0.0816006	-0.00446737	6.22328e-05	0.833813	0.0914296	-0.0142572	0.214655	0.0739049	0.247327	0.000452798	0.124121	0.379455	protein_coding	-	ENSG00000138074
SLC5A6	2	27427659-27427949	0.0390761	-0.00129597	1.39892e-05	0.893879	-0.0996123	-0.0190651	2.17132e-06	0.392224	0.0686597	0.0333096	0.219505	0.172141	0.392426	3.25609e-05	0.372072	0.323059	protein_coding	-	ENSG00000138074
SLC5A6	2	27428003-27428372	0.0397196	-0.00149739	6.98928e-06	0.874853	-0.108508	-0.022773	1.33947e-07	0.294202	0.0564393	-0.0118739	0.191725	0.0865175	0.58148	0.00186248	0.246541	0.264432	protein_coding	-	ENSG00000138074
SLC7A6	16	68331137-68335722	0.0432887	-0.0205535	1.16215e-07	0.0168805	-0.063003	-0.0108991	0.00086427	0.582524	-0.0203843	0.0142829	0.129226	0.00179793	0.898442	0.0601225	0.0312363	0	protein_coding	+	ENSG00000103064
SLC7A6OS	16	68332063-68335308	0.0421878	-0.0190466	2.76081e-07	0.0264832	-0.0658455	-0.00507768	0.000539018	0.796989	-0.00805371	0.00157435	0.125909	0.00749554	0.98758	0.0651474	0.0319662	0	protein_coding	-	ENSG00000103061
SLC9A3R2	16	2076888-2077219	0.0394951	0.0241487	9.41525e-08	0.00217768	-0.0463357	0.00299024	0.00617587	0.868018	0.0483735	0.0441084	-0.0507728	-0.00219204	0.36609	0.581973	0.0611863	0.165663	protein_coding	+	ENSG00000065054
SLC9A3R2	16	2079583-2079783	0.0447605	0.0243199	1.01977e-09	0.00440488	-0.0785039	-0.00304354	3.44539e-06	0.875536	0.000148525	0.0668124	0.0234497	0.00221661	0.396082	0.905405	0.250244	0.0175861	protein_coding	+	ENSG00000065054
SLC9A3R2	16	2086325-2086504	0.0581141	0.0267447	3.4639e-14	0.00202558	-0.0986412	-0.0304168	2.99434e-08	0.126099	-0.00983021	0.0665168	0.0115496	-0.00448232	0.428746	0.976206	0.257084	0.0720852	protein_coding	+	ENSG00000065054
SLC9A3R2	16	2086729-2086882	0.060798	0.0269889	4.88498e-15	0.00203842	-0.111823	-0.0267848	5.10898e-10	0.183309	-0.0317845	0.0402964	-0.0105077	-0.0101725	0.607282	0.965591	0.0956381	0	protein_coding	+	ENSG00000065054
SLC9A3R2	16	2086956-2086999	0.0592868	0.0174156	3.30402e-13	0.0446866	-0.115075	-0.0145102	1.05352e-09	0.466029	-0.038125	0.0329886	-0.0831014	0.0390333	0.634638	0.274273	0.229898	8.33429e-13	protein_coding	+	ENSG00000065054
SLC9A3R2	16	2087539-2087601	0.0592284	0.0216603	1.69864e-13	0.0135066	-0.0968283	-0.0288224	1.70624e-07	0.153126	0.00743736	0.0462624	-0.0470654	0.0357317	0.672681	0.603835	0.194928	2.08456e-10	protein_coding	+	ENSG00000065054
SLC9A3R2	16	2087827-2089026	0.0624766	0.0315272	3.9968e-14	0.000463455	-0.119543	-0.03742	6.48007e-10	0.0704151	0.017046	0.0686976	-0.0679242	0.0573372	0.431688	0.343974	0.0660485	4.91807e-11	protein_coding	+	ENSG00000065054
SLCO2B1	11	74880711-74881049	-0.00466524	0.00591648	0.600401	0.461839	-0.00392592	0.0124484	0.849082	0.498095	-0.0696083	-0.143561	0.143939	-0.272707	0.024203	2.54467e-07	0	0.0217784	protein_coding	+	ENSG00000137491
SLCO4A1	20	61287711-61288602	0.0428859	0.0284631	4.62735e-07	0.001681	-0.100739	-0.0632081	3.93705e-07	0.0023194	0.0562061	-0.114568	0.0130948	-0.034788	0.0888377	0.835059	0.207416	2.72876e-20	protein_coding	+	ENSG00000101187
SLCO4A1	20	61297732-61297927	0.0414063	0.0104452	1.09288e-06	0.233039	-0.0491718	-0.0455764	0.0105655	0.0227862	0.0333869	-0.068042	0.045896	-0.0529601	0.405524	0.493995	2.10029e-09	0.0362473	protein_coding	+	ENSG00000101187
SLCO4A1	20	61299093-61299893	0.0311829	0.0177486	0.000289686	0.0492678	-0.118283	-0.106408	6.77456e-09	4.81493e-07	0.0269096	-0.112763	0.0598244	0.0271245	0.145367	0.508202	0.236354	0.108279	protein_coding	+	ENSG00000101187
SLCO4A1	20	61303102-61303647	0.0239517	0.00976658	0.0056635	0.218515	-0.0905309	-0.073776	8.89724e-06	6.29811e-05	-0.0183332	-0.100492	-0.0639301	0.0427278	0.210575	0.345974	9.76861e-15	2.61675e-10	protein_coding	+	ENSG00000101187
SLIT3	5	168244305-168244468	0.0074614	0.0100051	0.405286	0.161454	0.012349	0.00387926	0.552014	0.812154	0.00158466	-0.154295	0.0307364	-0.248342	0.0436166	2.57184e-06	0.105225	2.33279e-08	protein_coding	-	ENSG00000184347
SLMAP	3	57913019-57914895	-0.00880964	-0.00747093	0.268699	0.299652	-0.0134677	0.00831279	0.46418	0.618227	-0.0213119	-0.106613	0.100526	0.245938	0.126146	2.41364e-07	0.114734	0.102401	protein_coding	+	ENSG00000163681
SLTM	15	59171244-59172306	-0.0387073	-0.021022	8.47711e-06	0.00799016	0.0408504	-0.0152865	0.0418025	0.403385	0.0130547	0.00157558	0.0113115	0.122814	0.970791	0.0712225	0.0899325	2.03501e-10	protein_coding	-	ENSG00000137776
SMAD6	15	66994670-66996413	0.0492272	0.0191094	2.71445e-10	0.0220631	-0.0243317	0.0516047	0.165465	0.00691948	0.166366	0.057593	0.137194	-0.077613	0.00112815	0.0156232	0.0165183	0	protein_coding	+	ENSG00000137834
SMAD6	15	67004006-67004062	0.044364	NA	9.88269e-08	NA	-0.0127024	NA	0.500451	NA	0.044161	0.0733634	NA	NA	0.267429	NA	0	NA	protein_coding	+	ENSG00000137834
SMAD6	15	67008759-67008836	0.0420252	NA	5.75628e-07	NA	-0.0114704	NA	0.547555	NA	0.129043	0.00237985	NA	NA	0.0435495	NA	3.43427e-09	NA	protein_coding	+	ENSG00000137834
SMAD6	15	67073335-67074338	0.0401691	0.00463677	3.00927e-07	0.61372	-0.0106162	0.0179179	0.55242	0.396693	0.0938187	0.0448963	0.118447	-0.00571855	0.100422	0.124961	0.00128665	4.99977e-11	protein_coding	+	ENSG00000137834
SMAD7	18	46446223-46448280	0.0766331	0.000161065	2.2e-16	0.985421	-0.0966772	0.00351094	5.54525e-07	0.861634	0.0405118	0.0522125	0.168396	0.153267	0.446736	0.000232367	0.0488255	2.23304e-17	protein_coding	-	ENSG00000101665
SMAD7	18	46468851-46468925	0.0587317	0.0172011	3.03833e-11	0.0551402	-0.0593115	0.018152	0.00297038	0.372954	-0.0259282	0.0509314	0.0338665	0.0826706	0.619593	0.293791	0.282565	0	protein_coding	-	ENSG00000101665
SMAD7	18	46474754-46474807	0.0448821	NA	3.70221e-07	NA	-0.0316635	NA	0.11488	NA	0.0250933	0.0240854	NA	NA	0.81353	NA	0.212107	NA	protein_coding	-	ENSG00000101665
SMAD7	18	46476182-46477081	0.0706666	0.0125486	4.44089e-16	0.150556	-0.0725744	0.0198276	0.000189942	0.31885	0.0190761	0.0443271	0.17791	0.0757758	0.688225	0.00160999	6.52056e-17	4.03007e-09	protein_coding	-	ENSG00000101665
SMTN	22	31484440-31484592	0.00738296	-0.00797028	0.349696	0.286771	-0.00427335	0.0293799	0.8148	0.0854473	0.0404135	0.0165024	0.212841	0.117402	0.67176	1.32453e-06	0.40166	4.81572e-10	protein_coding	+	ENSG00000183963
SNX27	1	151666069-151671567	0.000480431	-0.0293614	0.957546	0.000440455	0.0286225	0.0306261	0.178143	0.109272	0.0485393	-0.0799976	0.212808	0.141826	0.329969	5.97862e-06	8.61982e-10	0.13144	protein_coding	+	ENSG00000143376
SOGA3	6	127759551-127765427	-0.0439729	-0.00970593	7.34373e-07	0.2567	0.031687	-0.0016974	0.120697	0.931547	-0.0489384	-0.0265797	0.154223	0.142255	0.590839	0.000578591	0.455116	0.0123223	protein_coding	-	ENSG00000214338
SOGA3	6	127767553-127768885	-0.0415428	-0.00144259	1.84279e-06	0.847843	0.0285289	0.00975913	0.153472	0.571685	-0.00149158	-0.0391048	0.05279	0.0843986	0.796437	0.115556	0.257807	0.0582518	protein_coding	-	ENSG00000214338
SOGA3	6	127759551-127765427	-0.0439729	-0.00970593	7.34373e-07	0.2567	0.031687	-0.0016974	0.120697	0.931547	-0.0489384	-0.0265797	0.154223	0.142255	0.590839	0.000578591	0.455095	0.0123358	protein_coding	-	ENSG00000255330
SOGA3	6	127767553-127768885	-0.0415428	-0.00144259	1.84279e-06	0.847843	0.0285289	0.00975913	0.153472	0.571685	-0.00149158	-0.0391048	0.05279	0.0843986	0.796437	0.115556	0.257775	0.0582539	protein_coding	-	ENSG00000255330
SORBS1	10	97071528-97074883	0.0185696	0.00179535	0.0304684	0.826047	-0.0106848	-0.00472928	0.59242	0.802832	-0.0735178	-0.0878257	0.211308	0.160504	0.11196	2.59325e-06	0.662772	8.29835e-13	protein_coding	-	ENSG00000095637
SOX4	6	21593972-21598847	-0.0545407	-0.00640748	3.87925e-10	0.391492	0.113231	0.0364364	3.60092e-08	0.0333899	0.0363566	-0.120659	0.0802523	0.04903	0.109272	0.122254	0.480245	0.262189	protein_coding	+	ENSG00000124766
SP5	2	171572769-171574588	-0.00538766	-0.00981124	0.537547	0.256471	-0.0067039	0.00976205	0.74197	0.621803	-0.068898	-0.125905	-0.0429731	-0.311442	0.0426595	6.06645e-07	0.303073	0.610216	protein_coding	+	ENSG00000204335
SPATA13	13	24895511-24896096	0.0157618	NA	0.0861918	NA	-0.0338312	NA	0.115999	NA	-0.0253957	-0.317963	NA	NA	6.78236e-06	NA	0.337662	NA	protein_coding	+	ENSG00000182957
SPECC1L	22	24810502-24813707	-0.0293856	-0.0171141	0.000295291	0.0618753	0.0325998	0.0441638	0.0815611	0.037345	0.106623	0.0093841	0.1475	0.288804	0.100885	6.18963e-07	1.82462e-09	2.20699e-15	protein_coding	+	ENSG00000100014
SPEG	2	220307830-220308359	NA	-0.00595039	NA	0.524634	NA	-0.0155943	NA	0.47072	NA	NA	0.107401	0.287322	NA	6.33611e-06	NA	0.0324909	protein_coding	+	ENSG00000072195
SPEG	2	220309375-220309464	NA	0.00999569	NA	0.278471	NA	-0.0145811	NA	0.49092	NA	NA	0.16338	0.272119	NA	9.48827e-07	NA	3.61388e-21	protein_coding	+	ENSG00000072195
SPEG	2	220309547-220309883	NA	0.00315383	NA	0.727765	NA	0.0144175	NA	0.485265	NA	NA	0.128148	0.290563	NA	6.6074e-07	NA	0	protein_coding	+	ENSG00000072195
SPEG	2	220325944-220326779	NA	0.00372474	NA	0.690285	NA	0.00648499	NA	0.76343	NA	NA	0.129907	0.342581	NA	3.91899e-08	NA	0.088239	protein_coding	+	ENSG00000072195
SPEG	2	220327020-220327108	NA	0.00574988	NA	0.536059	NA	0.0259022	NA	0.224999	NA	NA	0.125471	0.28729	NA	2.14611e-06	NA	0.128414	protein_coding	+	ENSG00000072195
SPEG	2	220329155-220331584	-0.0135317	-0.000737406	0.128418	0.935717	-0.00207471	-0.00932855	0.919438	0.658139	-0.0285796	-0.0657	0.0690395	0.291385	0.472164	8.40341e-06	0.344235	3.40327e-13	protein_coding	+	ENSG00000072195
SPEG	2	220333300-220333458	NA	0.00027245	NA	0.975014	NA	0.0356989	NA	0.0735993	NA	NA	0.176239	0.20499	NA	8.13648e-06	NA	7.96549e-15	protein_coding	+	ENSG00000072195
SPEG	2	220333581-220333770	NA	-0.000633838	NA	0.943123	NA	0.00177356	NA	0.93092	NA	NA	0.183638	0.223028	NA	3.52617e-06	NA	0	protein_coding	+	ENSG00000072195
SPEG	2	220336384-220337053	NA	0.00961416	NA	0.270675	NA	-0.00743518	NA	0.708792	NA	NA	0.092957	0.259945	NA	9.09178e-06	NA	0.175721	protein_coding	+	ENSG00000072195
SPEG	2	220341999-220342167	NA	-0.00203355	NA	0.818043	NA	-0.0309003	NA	0.125715	NA	NA	0.186638	0.205503	NA	4.72478e-06	NA	1.9324e-09	protein_coding	+	ENSG00000072195
SPEG	2	220347820-220349794	NA	0.00162579	NA	0.853349	NA	-0.00606843	NA	0.763258	NA	NA	0.153781	0.276551	NA	2.29954e-07	NA	0.102875	protein_coding	+	ENSG00000072195
SPEG	2	220353220-220353387	NA	-0.0151356	NA	0.109002	NA	0.00399158	NA	0.853905	NA	NA	0.17711	0.301551	NA	1.13833e-07	NA	0.00700675	protein_coding	+	ENSG00000072195
SPEG	2	220353500-220353622	NA	0.000498902	NA	0.958352	NA	-0.00519691	NA	0.813564	NA	NA	0.122951	0.333641	NA	2.26302e-07	NA	0	protein_coding	+	ENSG00000072195
SPEG	2	220353776-220353943	NA	0.0109064	NA	0.230409	NA	0.0134418	NA	0.518309	NA	NA	0.11878	0.284239	NA	1.94905e-06	NA	0.00905313	protein_coding	+	ENSG00000072195
SPEG	2	220354058-220354661	NA	-0.000700278	NA	0.939713	NA	0.00211971	NA	0.920627	NA	NA	0.0964368	0.310967	NA	1.04428e-06	NA	1.64301e-07	protein_coding	+	ENSG00000072195
SPEG	2	220355455-220355678	NA	-0.0061755	NA	0.517727	NA	-0.00711377	NA	0.74711	NA	NA	0.0411636	0.327921	NA	2.87006e-06	NA	0.223176	protein_coding	+	ENSG00000072195
SPEG	2	220356833-220356982	NA	0.00965405	NA	0.285964	NA	0.00489259	NA	0.812708	NA	NA	0.0556259	0.329972	NA	2.58798e-07	NA	0.010857	protein_coding	+	ENSG00000072195
SPEN	1	16264307-16264501	0.0392777	0.0100009	5.67687e-06	0.273307	-0.0168547	0.0416178	0.392761	0.0462815	0.0971776	-0.048082	0.0306157	0.115135	0.144758	0.133744	0.453279	0.309563	protein_coding	+	ENSG00000065526
SPHK2	19	49133691-49133973	0.0442854	0.0488271	3.77405e-07	9.03424e-08	-0.0528313	-0.0478874	0.00761327	0.0201707	-0.0243319	0.0050498	-0.110037	0.0152562	0.898995	0.147563	1.26383e-06	3.21426e-11	protein_coding	+	ENSG00000063176
SPON2	4	1163551-1164364	-0.0101654	-0.0167057	0.235863	0.0499566	-0.0165497	-0.030555	0.415239	0.122026	0.0346682	0.0119553	0.23911	0.184357	0.799024	2.93242e-07	0.673108	0.579933	protein_coding	-	ENSG00000159674
SPON2	4	1164787-1164978	-0.00308813	-0.00627089	0.70755	0.423262	-0.0278036	-0.0177452	0.158077	0.324118	0.00380154	0.0141943	0.154523	0.195793	0.967492	5.62865e-06	0.584457	0.527847	protein_coding	-	ENSG00000159674
SPOP	17	47676246-47677884	-0.0412449	-0.0276186	4.23644e-06	0.000253208	0.0487023	0.0144937	0.0183006	0.399466	0.0578278	0.0520554	0.0627275	0.111526	0.395782	0.0292797	4.34479e-13	0.00336366	protein_coding	-	ENSG00000121067
SPSB1	1	9415766-9416644	0.0803015	0.0163331	2.2e-16	0.0504919	-0.104452	0.0028404	5.52374e-08	0.8817	0.0128308	0.0424462	-0.0274057	-0.0197417	0.723655	0.808594	0.287302	0.0132722	protein_coding	+	ENSG00000171621
SPSB1	1	9427507-9429591	0.0754067	0.0150109	2.2e-16	0.085354	-0.10119	-0.00947495	3.57549e-07	0.63589	-0.0194134	0.0312421	-0.0761188	0.0121423	0.815008	0.377107	0.125926	0.579809	protein_coding	+	ENSG00000171621
SPTAN1	9	131344973-131345128	0.00730835	0.00956446	0.385332	0.136169	0.00444726	0.00936603	0.818928	0.522543	-0.00909545	-0.0479904	0.0857481	-0.216475	0.690169	1.04687e-06	0.326326	0.445441	protein_coding	+	ENSG00000197694
SPTAN1	9	131345356-131345560	0.00730971	0.00924319	0.385958	0.149488	0.0137908	0.0160101	0.477896	0.273664	-0.0252684	-0.058394	0.0481804	-0.218332	0.518714	2.43231e-06	0.273808	0.335537	protein_coding	+	ENSG00000197694
SSPN	12	26274924-26275085	0.0584466	0.0288909	1.50182e-11	0.00101123	-0.0681751	-0.00800192	0.000490946	0.688002	-0.0171299	-0.0513313	0.121775	0.073948	0.645137	0.0306982	0.0593334	1.62716e-17	protein_coding	+	ENSG00000123096
ST3GAL5	2	86066267-86067965	-0.0399961	-0.0367509	4.185e-06	2.47477e-06	0.0706529	0.0162778	0.000434796	0.358714	-0.0295446	-0.0800736	0.0605656	-0.0360546	0.333986	0.384927	0	0	protein_coding	-	ENSG00000115525
ST5	11	8751497-8752756	-0.00229895	0.014743	0.796404	0.040289	-0.00965092	0.0182342	0.638149	0.265405	0.190258	-0.0996769	0.216154	0.0538638	0.00109949	4.70709e-06	4.33498e-11	0	protein_coding	-	ENSG00000166444
ST6GAL1	3	186793350-186796341	0.0396528	0.0141468	4.76354e-06	0.11127	-0.0729396	0.0111692	0.000335191	0.584175	0.0523523	-0.144782	0.103322	-0.000492051	0.0371277	0.18452	0.413822	0.0718051	protein_coding	+	ENSG00000073849
ST6GALNAC1	17	74620847-74621609	0.0354719	0.00153631	3.56437e-05	0.875188	-0.0969637	-0.0583238	1.23283e-06	0.00986682	-0.0552597	-0.164019	-0.0952111	-0.0548008	0.00872257	0.197634	0.277797	1.32425e-08	protein_coding	-	ENSG00000070526
ST6GALNAC1	17	74625094-74625793	0.0388434	0.000940164	9.77099e-06	0.915996	-0.123107	-0.0221043	2.47705e-09	0.277746	0.00416779	-0.138972	-0.0182983	-0.00873066	0.065874	0.93285	0.306359	0.276214	protein_coding	-	ENSG00000070526
STAMBPL1	10	90665200-90665417	-0.0442404	-0.00342816	4.86137e-07	0.712389	0.0310161	0.0256886	0.122195	0.229809	0.000249087	0.14506	-0.067398	-0.0220014	0.0470434	0.467835	0.308746	0.0916001	protein_coding	+	ENSG00000138134
STAMBPL1	10	90674291-90674415	-0.0431949	-0.00951766	5.25107e-07	0.285961	0.0741426	0.00157225	0.000166894	0.938244	0.0334031	0.105635	0.0499868	0.154453	0.134734	0.019652	0.0719598	0	protein_coding	+	ENSG00000138134
STAMBPL1	10	90676437-90676574	-0.0462362	-0.0162876	1.60708e-07	0.069392	0.0662927	0.00617305	0.00114001	0.763076	0.0896382	0.020346	0.0628536	0.11254	0.235641	0.0814519	1.80797e-10	5.4023e-09	protein_coding	+	ENSG00000138134
STAMBPL1	10	90681040-90681152	-0.0550259	-0.00620256	1.65754e-09	0.486312	0.0646436	-0.001058	0.00190045	0.958721	0.0537776	-0.0160115	0.0528737	0.0545534	0.615026	0.39758	0	0.165124	protein_coding	+	ENSG00000138134
STAMBPL1	10	90682094-90682193	-0.0485665	-0.0237018	3.84966e-08	0.00772677	0.0626937	-0.0265777	0.00186645	0.18998	0.103609	-0.035783	0.0067322	0.047349	0.139135	0.717763	0	4.34172e-09	protein_coding	+	ENSG00000138134
STAMBPL1	10	90682925-90683244	-0.0460242	-0.0297785	2.06041e-07	0.00031566	0.0862099	-0.0266856	2.59689e-05	0.154443	0.0367543	0.0530907	0.0134493	0.0140178	0.540326	0.930184	0.420804	9.36183e-14	protein_coding	+	ENSG00000138134
STARD13	13	33677307-33679847	0.0514772	-0.00318907	2.0234e-10	0.637752	-0.052515	-0.00212576	0.00458968	0.89083	-0.0449364	-0.0712087	0.0764095	0.157274	0.267629	0.000342444	0.135533	2.88433e-11	protein_coding	-	ENSG00000133121
STARD13	13	33684010-33684227	0.0448626	0.00866811	4.27953e-07	0.204305	-0.0379408	-0.00158078	0.0621467	0.918882	-0.0694028	-0.0315874	0.0765071	-0.0263297	0.382776	0.178593	0.137281	3.76834e-12	protein_coding	-	ENSG00000133121
STARD13	13	33686858-33687330	0.0414019	0.00793507	3.54332e-06	0.230493	-0.0178392	0.00855448	0.386628	0.570261	-0.0220646	-0.103183	0.10097	0.0502407	0.213893	0.0207092	0	0.0757803	protein_coding	-	ENSG00000133121
STARD13	13	33703066-33704426	0.0385792	0.0138312	9.7098e-06	0.0299004	-0.0175246	0.0133266	0.382068	0.358883	-0.0289687	-0.0651976	0.0602924	-0.0389141	0.465172	0.226792	0.126267	0.307038	protein_coding	-	ENSG00000133121
STARD7	2	96850597-96852652	-0.0386337	-0.00495696	6.634e-06	0.556891	0.0159487	0.0528178	0.420683	0.00668668	0.0145329	0.02838	0.11026	0.0709462	0.854239	0.0451866	0.505651	0.328749	protein_coding	-	ENSG00000084090
STARD8	X	67937054-67938471	0.04431	0.00961088	2.3387e-06	0.217547	-0.0511688	-0.00879332	0.0187697	0.621116	0.146998	-0.0619165	0.0783669	-0.124821	0.0327426	0.0214381	0.0344833	3.87216e-09	protein_coding	+	ENSG00000130052
STARD8	X	67944147-67945684	0.0428261	0.015478	2.1212e-06	0.0986638	-0.0731712	-0.0450461	0.000469473	0.0352241	0.101479	-0.0415922	0.0441371	0.0551101	0.166297	0.48948	0.297953	6.41475e-12	protein_coding	+	ENSG00000130052
STK11	19	1205798-1207202	0.0096168	0.0106752	0.136255	0.140657	0.0201412	0.0429458	0.177643	0.00970065	0.0745094	0.201351	0.0891411	0.0383239	5.11287e-06	0.0939278	0.120614	0.112882	protein_coding	+	ENSG00000118046
STK17B	2	196998290-197002453	-0.0418758	-0.0101893	1.58649e-07	0.210328	0.0337898	-0.00995229	0.0680182	0.596113	-0.0762066	-0.139778	0.0435322	-0.0357662	0.00922742	0.58977	0.435579	1.22215e-13	protein_coding	-	ENSG00000081320
STK35	20	2083414-2084011	0.0442778	0.0182466	4.45606e-07	0.0329573	-0.0436516	-0.00524203	0.0293182	0.787386	0.00344686	0.0158084	0.0769667	-0.0173789	0.962182	0.341958	8.16623e-14	0	protein_coding	+	ENSG00000125834
STK35	20	2097312-2098061	0.0520051	0.0209358	2.4026e-09	0.0106544	-0.062001	-0.0261385	0.0019834	0.160515	0.024182	-0.0421564	0.0820336	-0.141919	0.70943	0.0135848	0.0257541	0	protein_coding	+	ENSG00000125834
STK35	20	2124430-2129201	0.0748372	0.0332576	2.2e-16	0.000424278	-0.11402	-0.0716316	5.75211e-09	0.000965191	0.0452211	0.0759973	0.0883367	-0.000217439	0.258656	0.327247	0.369499	0	protein_coding	+	ENSG00000125834
STK38	6	36461669-36463691	-0.0358022	-0.0242258	9.11162e-06	0.00343138	0.0240964	0.0277732	0.201987	0.144872	-0.0206838	-0.0558775	0.0976914	0.0931788	0.554864	0.0356488	0.360831	4.11832e-11	protein_coding	-	ENSG00000112079
STK38L	12	27475261-27478892	-0.052321	-0.00547232	2.13918e-12	0.435464	0.0783304	-0.00727129	4.35201e-06	0.652947	-0.0073083	-0.176121	0.092981	0.0934715	0.00186747	0.0119582	0.224969	0.0697418	protein_coding	+	ENSG00000211455
STXBP6	14	25278862-25281938	0.00211075	0.0233771	0.812762	0.0041522	-0.0237563	-0.0926292	0.255934	1.35358e-06	0.0520224	-0.0644762	-0.0295224	0.057292	0.395385	0.520272	0.558907	0.310601	protein_coding	-	ENSG00000168952
SYNGR1	22	39770321-39772215	0.0117218	0.00038694	0.173889	0.96099	0.0240154	0.08191	0.227091	7.42581e-06	0.0315809	0.0277282	0.114346	0.12233	0.737336	0.00371544	0.178795	0.293576	protein_coding	+	ENSG00000100321
SYT7	11	61282785-61286203	0.0509647	0.0175654	1.7321e-08	0.0523758	-0.0853012	-0.0102402	4.4533e-05	0.619788	0.0349975	0.00661799	0.0985597	0.157045	0.814073	0.00574764	0.597692	0	protein_coding	-	ENSG00000011347
SYTL2	11	85415900-85416298	-0.0374836	-0.0255175	6.32712e-06	0.00138566	0.0695168	0.0254683	0.000267486	0.163038	0.0262501	-0.0756411	0.066399	0.00553453	0.359368	0.40315	5.14732e-10	0.307581	protein_coding	-	ENSG00000137501
TACC1	8	38602413-38603011	0.0371654	0.013121	4.78527e-06	0.0405627	-0.0183028	-0.0272021	0.32784	0.0638341	-0.0481395	-0.0373563	-0.0414267	-0.0497624	0.504281	0.271581	6.51985e-12	0.592805	protein_coding	+	ENSG00000147526
TACC1	8	38705473-38710546	0.0413619	0.00718026	2.52392e-07	0.251958	-0.0679275	-0.0264431	0.000277703	0.0657502	-0.0183257	-0.0599711	0.0908165	-0.031315	0.498737	0.0587401	0.118017	0.400466	protein_coding	+	ENSG00000147526
TACC2	10	124005988-124008318	0.0422061	-0.0223742	8.63414e-06	0.0109404	-0.0719138	0.0126926	0.00124798	0.529558	0.0611154	0.00800722	0.0346095	0.110778	0.583691	0.133673	0.541378	0.22011	protein_coding	+	ENSG00000138162
TAF5L	1	229728858-229730841	-0.00472638	0.00371264	0.57572	0.662944	-0.014833	-0.00882309	0.44878	0.651431	0.177788	-0.0450564	0.183236	0.185755	0.0034021	8.84579e-06	3.84604e-08	0.0561256	protein_coding	-	ENSG00000135801
TAOK2	16	29997586-29999719	-0.0183458	-0.0167764	0.0273449	0.0542425	0.0502392	0.0273261	0.00980938	0.171848	0.207912	0.104572	0.233659	0.136266	7.34837e-05	6.35773e-06	0.315534	1.6482e-08	protein_coding	+	ENSG00000149930
TAPT1	4	16162128-16165160	-0.0394258	-0.0125066	2.7069e-06	0.0900198	0.0240838	-0.0154111	0.21775	0.36633	0.0269847	0.0433822	0.11639	0.112918	0.652187	0.00266453	0.263926	4.81703e-09	protein_coding	-	ENSG00000169762
TBC1D24	16	2550805-2553486	0.0399298	-0.00304366	3.13045e-06	0.719934	-0.0196129	0.00203123	0.317379	0.916704	0.0935584	0.117869	0.148304	0.0349445	0.0232888	0.0153163	0.131814	0.393933	protein_coding	+	ENSG00000162065
TBC1D2B	15	78337242-78337410	0.00577866	0.00317642	0.521496	0.655302	0.0421459	0.0196878	0.0442612	0.224498	0.0602003	-0.072865	0.139795	-0.211635	0.301924	1.62735e-06	0	0	protein_coding	-	ENSG00000167202
TBXA2R	19	3594504-3595931	0.0410428	0.0261433	2.76922e-06	0.00278093	-0.0785059	-0.0172268	0.000128893	0.391582	0.12777	0.0483283	0.028909	0.123412	0.0435416	0.0917297	0.140095	1.02237e-12	protein_coding	-	ENSG00000006638
TBXA2R	19	3599847-3600715	0.037626	0.0106961	1.16783e-05	0.219513	-0.0932309	-0.019905	3.98124e-06	0.31756	0.0776999	0.0931993	0.0817023	0.112616	0.0881987	0.0410955	2.65564e-14	0.0360205	protein_coding	-	ENSG00000006638
TDRP	8	439803-442744	0.041063	-0.00188249	5.81226e-06	0.791658	-0.0258515	-0.0150625	0.217432	0.35989	0.16305	-0.0242663	0.0708244	0.0717524	0.0169485	0.0809562	0	0.354292	protein_coding	-	ENSG00000180190
TEAD3	6	35444079-35444212	-0.00250737	-0.00566678	0.787911	0.512673	-0.0314104	0.000748634	0.144676	0.96975	0.0573539	0.0979463	0.162436	0.229667	0.177753	2.17346e-06	0.519024	0	protein_coding	-	ENSG00000007866
TEF	22	41777933-41778205	0.0632174	0.0427478	2.94431e-13	3.14032e-07	-0.0602037	-0.0282481	0.00197908	0.132109	-0.0020424	-0.0582446	0.0250674	-0.0242548	0.593908	0.818236	0	0.0633458	protein_coding	+	ENSG00000167074
TEF	22	41783355-41783672	0.0872373	0.046955	2.2e-16	1.30206e-09	-0.117262	-0.0628984	1.1513e-09	0.000329989	0.0494946	-0.0267887	0.0256983	-0.0993979	0.572298	0.142747	0.0765222	0	protein_coding	+	ENSG00000167074
TEF	22	41790100-41790320	0.0878272	0.0459635	2.2e-16	1.13111e-08	-0.109694	-0.0673345	2.47997e-09	0.000220911	0.0878262	-0.0249841	0.00357597	-0.0986648	0.182754	0.182165	0.0562489	0.017397	protein_coding	+	ENSG00000167074
TEF	22	41791749-41795330	0.0948878	0.0740123	2.2e-16	2.2e-16	-0.147197	-0.121865	3.13083e-14	2.24336e-09	-0.0196364	0.0167633	-0.0755927	-0.0547066	0.891368	0.228518	0.314799	5.72475e-19	protein_coding	+	ENSG00000167074
TENC1	12	53447749-53447798	0.040855	-0.00179449	9.09617e-07	0.834526	-0.015036	-0.00546353	0.428235	0.78118	0.157755	0.0800302	0.11172	-0.00745713	0.00258591	0.115197	0.525586	0.0700109	protein_coding	+	ENSG00000111077
TENC1	12	53447811-53448225	0.0397719	0.00098953	3.7011e-06	0.903063	-0.0153849	-0.0095695	0.436233	0.606887	0.132184	0.0734792	0.079522	0.0141344	0.0186249	0.277667	0.643441	0.272531	protein_coding	+	ENSG00000111077
TENC1	12	53451712-53451886	0.0422332	0.00690191	7.75822e-07	0.420983	-0.0384168	-0.0119868	0.0510053	0.539324	0.1764	0.0701597	0.143983	0.0109451	0.0016918	0.0259274	0.456654	0.0574203	protein_coding	+	ENSG00000111077
TENC1	12	53452100-53452638	0.0414005	0.00689104	1.74565e-06	0.426003	-0.0605871	-0.0153737	0.00260264	0.435811	0.149033	0.0643538	0.175071	0.0130343	0.0109644	0.00497337	0.530937	1.62136e-10	protein_coding	+	ENSG00000111077
TENC1	12	53452831-53454042	0.0391999	0.0102934	2.00086e-06	0.20567	-0.0439068	-0.00695777	0.0221023	0.708359	0.0868683	0.122161	0.126419	-0.00657328	0.0200462	0.0468272	0.567057	0.186904	protein_coding	+	ENSG00000111077
TENC1	12	53454129-53454339	0.0434077	0.00262941	1.76918e-07	0.774495	-0.0539906	-0.0207912	0.00497733	0.323942	0.107994	0.0862872	0.0836556	-0.0062561	0.0297832	0.348215	0.669754	2.11956e-08	protein_coding	+	ENSG00000111077
TENC1	12	53454459-53455048	0.0407924	0.00181216	7.71423e-07	0.835535	-0.0453281	-0.0185194	0.0183211	0.357568	0.11573	0.0813818	0.103213	0.000897143	0.0268904	0.174726	0.234714	6.12014e-10	protein_coding	+	ENSG00000111077
TEX30	13	103418340-103418930	-0.0469243	-0.0206921	7.05367e-08	0.0123951	0.0239685	-0.0275389	0.224409	0.146089	0.0251812	0.12986	0.0562107	0.0869034	0.0729612	0.144142	0.22732	0.131702	protein_coding	-	ENSG00000151287
TFPI2	7	93514709-93516208	-0.0487068	-0.00788783	7.49492e-08	0.374355	0.0802743	-0.0122228	0.000156968	0.548464	0.0273322	-0.0603431	0.032448	-0.00577232	0.572295	0.841949	0.197	0.554181	protein_coding	-	ENSG00000105825
TFPI2	7	93516573-93516743	-0.0460631	0.000942189	3.4065e-07	0.917536	0.0640106	0.00284089	0.00221043	0.891007	0.0597954	-0.0457873	0.0425786	0.0862986	0.451661	0.258943	5.90201e-17	6.09143e-17	protein_coding	-	ENSG00000105825
TFPI2	7	93518347-93518535	-0.0460719	0.00781067	5.06996e-07	0.389158	0.0558346	0.00578237	0.00835348	0.779654	0.0519121	-0.0841204	0.0551476	0.114831	0.283431	0.0892805	3.23253e-11	0.13753	protein_coding	-	ENSG00000105825
TFPI2	7	93519230-93519631	-0.041314	NA	5.53805e-06	NA	0.0752884	NA	0.000335477	NA	0.0329783	-0.0860065	NA	NA	0.32795	NA	2.68823e-10	NA	protein_coding	-	ENSG00000105825
THRA	17	38230445-38230794	0.0410928	0.0282936	1.32961e-06	0.00100975	-0.0371525	0.0137667	0.0545584	0.480039	0.104429	0.0875798	0.0766198	0.0270296	0.0373075	0.303234	8.54858e-12	0.126829	protein_coding	+	ENSG00000126351
THRA	17	38233124-38233191	0.0456363	0.0231248	2.32779e-07	0.00739861	-0.0111456	0.0213874	0.57667	0.275223	0.0424685	0.0849496	0.0267555	-0.0759061	0.240119	0.389373	0	0	protein_coding	+	ENSG00000126351
THRA	17	38233761-38233861	0.0495196	NA	3.60449e-08	NA	-0.0377199	NA	0.0635851	NA	0.0872072	-0.00676305	NA	NA	0.283771	NA	7.40591e-11	0	protein_coding	+	ENSG00000126351
THRA	17	38240088-38240235	0.0518989	0.0139339	2.16139e-09	0.114706	-0.0354614	-0.000367325	0.0699784	0.9854	0.0663572	-0.00663553	-0.00516673	0.0635599	0.45449	0.559417	1.57517e-12	9.1249e-14	protein_coding	+	ENSG00000126351
THRA	17	38240863-38241068	0.0520561	0.0165953	9.7871e-11	0.0352763	-0.0634311	0.011286	0.000525948	0.531604	0.0740476	0.0748068	0.0420206	0.0822275	0.111447	0.19826	0.122	0	protein_coding	+	ENSG00000126351
THRA	17	38242960-38243106	0.0489677	0.0128754	2.37012e-09	0.10984	-0.0460218	0.0106575	0.0134128	0.563532	0.0236671	0.0396427	0.0325858	0.0436942	0.676154	0.570928	0	0	protein_coding	+	ENSG00000126351
THRA	17	38244495-38244753	0.0477418	0.0329349	2.61875e-08	3.91641e-05	-0.0450999	0.0227906	0.0219871	0.208344	-0.0156544	0.0488513	0.0597643	0.0615315	0.675928	0.231247	0.0462409	0	protein_coding	+	ENSG00000126351
THRA	17	38245459-38248880	0.0681929	0.0472073	2.22045e-16	5.62127e-08	-0.0890271	-0.0500709	2.27501e-06	0.0108613	0.0840836	0.0734107	-0.00365132	0.0977451	0.0919772	0.234014	0.177747	0.0576146	protein_coding	+	ENSG00000126351
THRA	17	38249273-38250120	0.0472797	0.0512015	4.92498e-09	1.42345e-09	-0.0795047	-0.045595	1.9589e-05	0.0168322	-0.0993955	0.0747213	-0.170502	0.0615037	0.0611708	0.00364814	0.0754273	0.237479	protein_coding	+	ENSG00000126351
TIGD5	8	144680074-144682485	-0.0088984	0.0141674	0.225491	0.0302751	0.0537063	0.0298624	0.00176138	0.046514	0.141013	0.201312	0.00592433	-0.0313219	2.94192e-06	0.77349	1.35994e-12	0.105888	protein_coding	+	ENSG00000179886
TLE2	19	3019281-3019771	-0.00225357	0.00768034	0.769021	0.371416	0.0106198	0.000146306	0.552292	0.994088	0.0740241	-0.0239844	0.173668	0.206487	0.286927	6.46735e-06	0.207991	0.243096	protein_coding	-	ENSG00000065717
TLE3	15	70340129-70343844	0.0512404	-0.0178917	3.93793e-10	0.0333569	-0.0716053	0.0737783	0.000207247	0.000127202	-0.0215506	-0.00670453	-0.0308148	0.165844	0.908745	0.0121603	0.367842	0	protein_coding	-	ENSG00000140332
TLE3	15	70344713-70348713	0.0597372	-0.0185883	3.21521e-13	0.0293073	-0.0663462	0.0621664	0.000461346	0.00144637	-0.00606808	-0.0610322	0.105508	0.0854324	0.544508	0.0392745	0.296752	0.343072	protein_coding	-	ENSG00000140332
TLE3	15	70349798-70351154	0.0577017	-0.0103998	3.30402e-13	0.19082	-0.0531866	0.044457	0.00333646	0.0145012	0.0198355	-0.106916	0.120253	0.0363909	0.128062	0.0375514	0.29074	0.235393	protein_coding	-	ENSG00000140332
TLE3	15	70352869-70352988	0.0532494	-0.00851409	3.23789e-10	0.343674	-0.0494369	0.0198753	0.010801	0.331837	0.0215833	-0.0618377	0.0925296	0.103735	0.521714	0.0478089	0.186918	5.79831e-16	protein_coding	-	ENSG00000140332
TLE3	15	70358353-70358557	0.0546499	0.00683901	4.68039e-11	0.411718	-0.0419499	0.0428013	0.0268873	0.0245396	0.0263721	-0.0222598	0.111377	0.00625843	0.816301	0.0983024	0.195818	0.293016	protein_coding	-	ENSG00000140332
TLE3	15	70366842-70366946	0.0403477	-0.0033983	6.60457e-07	0.686546	-0.0296323	0.00663999	0.11042	0.729959	-0.0624863	0.0111181	0.0412795	-0.00244476	0.455246	0.73477	0.0829938	0.270262	protein_coding	-	ENSG00000140332
TLE3	15	70389114-70390515	0.0503009	0.0056196	9.25482e-13	0.466165	-0.0300914	0.0461647	0.059712	0.00919341	0.0189644	-0.03311	0.0771699	0.0141275	0.717425	0.260146	0.219312	0.176458	protein_coding	-	ENSG00000140332
TMCC1	3	129366635-129370638	-0.0482659	-0.00722706	3.55727e-09	0.322769	0.0610301	0.0272127	0.00107437	0.105232	-0.0144277	-0.0303807	0.0805741	0.066798	0.809071	0.0708851	0.0608999	0.46574	protein_coding	-	ENSG00000172765
TMCC3	12	94960900-94965513	-0.0419368	-0.0388186	1.94674e-06	5.42538e-06	0.0617524	0.0697615	0.00254954	0.000385584	0.00632318	-0.0891527	0.0921117	-0.0264084	0.327782	0.216471	0.601517	0.0545775	protein_coding	-	ENSG00000057704
TMEM110	3	52870772-52874626	-0.0333178	-0.017347	0.000258888	0.0559111	0.0848928	0.0200647	7.14212e-05	0.331439	0.158308	0.0812451	0.314979	0.0301443	0.00836598	2.22172e-07	0.279406	2.32544e-18	protein_coding	-	ENSG00000213533
TMEM120A	7	75623808-75623977	0.0118399	0.0258273	0.148005	0.00110271	-0.00618281	0.0886254	0.743977	1.08744e-06	-0.0545611	0.11264	0.0403917	0.0155243	0.083037	0.671188	0	0.215617	polymorphic_pseudogene	-	ENSG00000189077
TMEM140	7	134849170-134850650	-0.0273827	-0.00345358	0.00239425	0.697459	0.0955899	0.0552418	8.58671e-06	0.00719039	-0.0694178	-0.0149109	0.0957204	-0.038099	0.45946	0.207252	0.392732	9.58531e-11	protein_coding	+	ENSG00000146859
TMEM163	2	135213330-135214347	0.0503623	NA	1.23718e-07	NA	-0.043358	NA	0.0502903	NA	-0.015457	-0.0295044	NA	NA	0.866511	NA	0.0551938	NA	protein_coding	-	ENSG00000152128
TMEM163	2	135223685-135227607	0.047758	NA	2.49994e-07	NA	-0.0157389	NA	0.455418	NA	0.00658154	0.0448447	NA	NA	0.757419	NA	0.28258	NA	protein_coding	-	ENSG00000152128
TMEM2	9	74298282-74300309	-0.0467126	-0.010537	4.25467e-08	0.206448	0.0973557	-0.0388072	7.76994e-07	0.0448342	0.0769903	-0.0802933	0.167506	0.179229	0.144445	2.79749e-05	0.339961	0.18408	protein_coding	-	ENSG00000135048
TMEM2	9	74315558-74315740	-0.0204247	-0.000848505	0.013877	0.899379	0.0868153	0.00746245	7.69983e-06	0.626879	0.0275387	-0.0799998	0.104699	-0.0891457	0.339468	0.00928072	0.334139	0.113768	protein_coding	-	ENSG00000135048
TMEM204	16	1584231-1584556	0.0432327	0.0283505	3.02356e-08	0.000960963	-0.0189383	0.0126272	0.2887	0.517632	0.153015	0.0534276	0.119909	-0.0506372	0.00350221	0.0645317	0.303558	0	protein_coding	+	ENSG00000131634
TMEM204	16	1591922-1592077	0.0454048	0.0185784	9.16143e-09	0.0284756	-0.0203736	0.00774211	0.259556	0.689371	0.103538	0.00114763	0.0996977	-0.0313774	0.108941	0.160032	0.118494	0	protein_coding	+	ENSG00000131634
TMEM204	16	1604783-1605243	0.0410892	0.019225	5.80797e-07	0.0374471	-0.0549221	-0.0189993	0.00379834	0.374204	0.130622	0.0326725	0.045402	-0.0133985	0.0316962	0.736489	0.049167	3.92978e-10	protein_coding	+	ENSG00000131634
TMEM251	14	93652605-93653434	-0.0407819	-0.0186784	2.98801e-06	0.0132218	0.0401355	0.000823436	0.0445309	0.961623	0.00494954	0.0860099	0.00343072	0.125744	0.342636	0.0435103	0.267856	0	protein_coding	+	ENSG00000153485
TMEM41A	3	185207389-185209545	-0.0440569	-0.022819	1.75026e-06	0.00288654	0.0342551	0.0447315	0.105553	0.0115482	0.119448	0.0165616	0.0253008	0.0487597	0.116115	0.547482	0	0.739801	protein_coding	-	ENSG00000163900
TMEM57	1	25824755-25826700	-0.0426049	-0.0123631	5.61095e-07	0.120823	0.0218926	-0.00367588	0.258528	0.840877	-0.00227136	0.0646331	0.0293374	0.091403	0.531973	0.184321	0.00904312	0	protein_coding	+	ENSG00000204178
TMEM63A	1	226044353-226044439	0.0145287	-0.00342607	0.119832	0.697248	0.0281055	-0.0228771	0.193193	0.255284	0.0601674	-0.010718	0.233463	0.20262	0.590307	1.86887e-07	6.74961e-11	0.286554	protein_coding	-	ENSG00000196187
TMEM70	8	74893390-74895018	-0.043024	-0.0300087	1.37671e-06	6.32285e-05	0.0108132	-0.0254928	0.598681	0.133591	0.0408113	0.015371	-0.0473136	0.0244386	0.737733	0.547133	0.208309	1.77751e-09	protein_coding	+	ENSG00000175606
TMEM8B	9	35841523-35841791	0.025274	0.0375115	0.0061791	7.08836e-06	-0.00167925	-0.00899585	0.937591	0.632291	0.000617687	0.00586167	0.0693182	0.0703407	0.995614	0.167495	0.335247	3.34441e-14	protein_coding	+	ENSG00000137103
TMTC1	12	29653757-29659919	0.0533411	0.0153522	8.45768e-11	0.0153233	-0.0637473	-0.0276452	0.00079771	0.055827	0.0149693	-0.105887	0.0656318	0.0603306	0.16042	0.0753604	0.225013	0.0770279	protein_coding	-	ENSG00000133687
TMTC2	12	83525989-83528649	0.0149454	0.0175059	0.0767954	0.0179103	-0.0408674	-0.0763264	0.0388463	9.6007e-06	0.0278781	-0.155628	-0.0424035	-0.0482432	0.0260153	0.395209	0.35399	0.304218	protein_coding	+	ENSG00000179104
TNFAIP8	5	118604387-118604602	0.0295756	-0.0226561	0.000767931	0.0161701	-0.119797	0.00611454	5.28697e-09	0.776016	-0.0210745	-0.0671926	0.0631018	0.010725	0.482188	0.542649	0.426059	0	protein_coding	+	ENSG00000145779
TNFAIP8	5	118728511-118730294	0.0145283	-0.0246551	0.103404	0.00250967	-0.122763	0.0221219	8.22018e-09	0.239364	-0.107398	-0.0404491	0.0193324	0.0222978	0.125065	0.852932	0.584108	0.117143	protein_coding	+	ENSG00000145779
TNFRSF12A	16	3071556-3071690	-0.0114898	0.0104675	0.156042	0.257354	0.00737103	0.0232288	0.696225	0.274085	0.0575911	0.0328534	0.223031	0.261776	0.42585	6.72404e-08	0.410575	0.18729	protein_coding	+	ENSG00000006327
TNFRSF12A	16	3071772-3072384	-0.0182085	0.00838103	0.021914	0.368137	0.00859873	0.0167709	0.642563	0.432957	0.0589371	0.0446917	0.150936	0.275376	0.335519	1.89665e-06	0.478656	0.270627	protein_coding	+	ENSG00000006327
TNFRSF25	1	6522379-6522667	0.058696	-0.00853149	1.05248e-10	0.319638	-0.0410108	-0.0200944	0.0487817	0.307438	0.0429052	-0.0402622	-0.0477605	0.115106	0.620914	0.107511	0	0.029528	protein_coding	-	ENSG00000215788
TNFRSF25	1	6525500-6526255	0.0486438	-0.00692518	1.86182e-09	0.4481	-0.0449568	-0.0111296	0.0166643	0.598031	0.00585085	0.0262276	0.0328788	0.0716583	0.884372	0.422072	0.584382	0	protein_coding	-	ENSG00000215788
TNK2	3	195594232-195597275	0.0309356	-0.0149117	5.09685e-06	0.0711147	-0.0184541	-0.00533486	0.235056	0.780013	0.0848406	0.152915	0.0382997	0.156242	0.000429455	0.0144185	0.178308	0	protein_coding	-	ENSG00000061938
TNK2	3	195610028-195613144	0.0461261	-0.0148306	3.48442e-09	0.107899	-0.0307175	0.000263752	0.0832201	0.99009	0.0574133	0.114798	0.0739847	0.113981	0.0386238	0.0746748	0.0840381	3.29567e-16	protein_coding	-	ENSG00000061938
TNNT2	1	201342247-201344496	NA	-0.0446332	NA	9.7625e-07	NA	0.0628144	NA	0.00265656	NA	NA	0.104562	0.0542641	NA	0.110595	NA	0.254072	protein_coding	-	ENSG00000118194
TOR1AIP2	1	179828165-179834989	-0.0381885	-0.0134323	8.80099e-06	0.0982198	0.0728544	0.0157427	0.000290357	0.400059	0.0396637	-0.00807194	-0.0252106	0.0156996	0.764818	0.859376	0.0508846	1.14139e-17	protein_coding	-	ENSG00000169905
TPM1	15	63334831-63336351	-0.00604724	-0.00574112	0.517803	0.543231	0.00544891	0.011611	0.802421	0.5942	-0.00657592	-0.119913	0.180511	0.229233	0.172094	9.78937e-06	0.168296	0.167341	protein_coding	+	ENSG00000140416
TPM1	15	63347928-63349317	-0.0136343	-0.000923324	0.138414	0.915176	-0.0274596	0.00679175	0.200243	0.733933	0.0225095	-0.0882879	0.200819	0.207792	0.35623	1.30419e-06	0.292014	0.258561	protein_coding	+	ENSG00000140416
TPM2	9	35681989-35682901	-0.0194467	-0.00624982	0.0147054	0.498558	0.0203968	0.00366155	0.267406	0.863618	0.0329072	-0.00915404	0.0950258	0.317774	0.798405	7.87966e-07	0.288676	3.14678e-12	protein_coding	-	ENSG00000198467
TPM2	9	35684485-35685336	-0.0123416	0.00014384	0.10679	0.987833	0.0149977	0.00363721	0.399511	0.867624	-0.0348563	0.000602506	0.0905415	0.29512	0.772454	7.7196e-06	0.18381	0.074681	protein_coding	-	ENSG00000198467
TPM2	9	35685644-35685777	-0.0157182	0.0020243	0.0498593	0.829165	0.0179729	0.0198358	0.333574	0.360294	-0.0344326	0.0200745	0.0817661	0.326196	0.749964	8.43268e-07	0.426154	0.0504033	protein_coding	-	ENSG00000198467
TPM2	9	35689143-35689268	-0.0150287	0.000880044	0.05978	0.925797	0.0170367	0.0213219	0.361144	0.328439	-0.0234092	-0.00765356	0.0770928	0.301986	0.886422	6.06257e-06	0.621688	0.0439811	protein_coding	-	ENSG00000198467
TPM2	9	35689701-35691017	-0.000347975	0.000861526	0.963898	0.926199	0.037034	0.0188938	0.0412532	0.37835	-0.0365732	0.052834	0.116044	0.290503	0.480785	2.9142e-06	0.544419	2.06821e-09	protein_coding	-	ENSG00000198467
TPO	2	1499761-1499969	0.0144439	NA	0.115016	NA	-0.0959334	NA	8.6954e-06	NA	0.019925	-0.190492	NA	NA	0.009837	NA	0.198602	NA	protein_coding	+	ENSG00000115705
TPO	2	1500367-1500537	0.00954276	NA	0.283745	NA	-0.0933351	NA	9.05713e-06	NA	0.0101495	-0.185468	NA	NA	0.0101936	NA	0.669916	NA	protein_coding	+	ENSG00000115705
TPO	2	1544366-1547483	0.0166838	0.00650733	0.0652535	0.515359	-0.117434	-0.0535419	7.01612e-08	0.0222719	0.00493131	-0.158524	0.106301	0.0833032	0.0429408	0.107141	0.380659	0.264405	protein_coding	+	ENSG00000115705
TREH	11	118531575-118531991	0.04482	NA	6.55712e-08	NA	0.00786979	NA	0.676753	NA	0.124419	0.0654707	NA	NA	0.0224881	NA	0.413892	NA	protein_coding	-	ENSG00000118094
TRIM27	6	28870779-28876617	-0.0364845	-0.0158839	9.92309e-06	0.0763215	0.0572113	0.0137699	0.00292796	0.506892	0.17933	0.0760222	0.223434	0.132281	0.00119807	3.28223e-05	0	0.195426	protein_coding	-	ENSG00000204713
TRIM35	8	27142404-27145644	-0.0112692	0.0402758	0.2194	1.51054e-05	0.0165091	-0.111638	0.44256	2.82061e-07	0.172646	0.0286236	-0.116161	-0.0750036	0.0112188	0.0594483	4.00856e-09	0	protein_coding	-	ENSG00000104228
TSC2	16	2097466-2098066	0.0380144	-0.0049231	7.46872e-06	0.590445	-0.0705179	0.00436227	0.00031481	0.834843	0.0356968	0.0129653	0.0530749	-0.0368646	0.770363	0.562432	0.35979	0.360005	protein_coding	+	ENSG00000103197
TSC22D3	X	106956451-106957979	0.0605901	0.0549829	5.83533e-13	2.23405e-09	-0.15107	-0.148529	3.24185e-14	6.23324e-12	-0.0608135	0.00776603	-0.0975996	-0.0921235	0.507454	0.0645342	1.48607e-18	3.99837e-10	protein_coding	-	ENSG00000157514
TSC22D3	X	106959003-106959775	0.0464858	0.0238522	3.10329e-07	0.0138991	-0.0799616	-0.0921836	0.000164391	5.01063e-05	0.0170197	-0.0822172	0.00615954	-0.0856386	0.40436	0.438477	0.174263	7.39077e-11	protein_coding	-	ENSG00000157514
TSC22D3	X	106959920-106960365	0.069841	0.0435932	2.2e-16	9.50162e-07	-0.139726	-0.0998599	8.5798e-13	1.18394e-06	0.0275815	0.00276784	-0.022412	-0.082615	0.864934	0.345138	0	0	protein_coding	-	ENSG00000157514
TSC22D3	X	107018330-107019218	0.0683263	0.0388573	4.44089e-16	1.51148e-05	-0.129787	-0.0734256	2.23404e-11	0.000349623	0.0200066	0.00453421	-0.0514115	-0.110066	0.922178	0.10587	7.55355e-09	3.22746e-10	protein_coding	-	ENSG00000157514
TSEN15	1	184041961-184043346	-0.0399143	-0.0170938	4.37184e-06	0.0204743	0.0242048	-0.0330417	0.229002	0.0505217	0.0199519	-0.0885571	0.0313556	0.0480771	0.313565	0.469174	0.271524	4.80212e-09	protein_coding	+	ENSG00000198860
TSPAN12	7	120427376-120428951	-0.0527447	-0.00731006	3.72313e-10	0.345747	0.0839916	-0.00418748	1.87715e-05	0.814053	0.045815	-0.107944	0.0473371	0.0610266	0.12974	0.290556	1.31562e-11	0.131475	protein_coding	-	ENSG00000106025
TSPAN9	12	3392211-3395730	-0.0117528	-0.0282696	0.183836	0.000548719	0.021732	0.0899255	0.302603	2.24363e-06	0.0438978	0.0971434	0.0854846	0.0996019	0.215961	0.0388603	0.128173	0.0488295	protein_coding	+	ENSG00000011105
TTC30B	2	178414890-178417742	0.0404983	-0.0106475	3.63673e-06	0.113863	-0.0412944	0.00873834	0.0394678	0.569255	0.00967931	-0.103785	0.0336048	0.0188034	0.209397	0.648762	0	0	protein_coding	-	ENSG00000196659
TUBG1	17	40766278-40766430	-0.00871104	-0.040314	0.295117	8.40921e-06	-0.0180087	-0.01446	0.35251	0.484235	0.0247221	0.065768	-0.0376687	0.0678605	0.448412	0.451929	0.176068	0.0990498	protein_coding	+	ENSG00000131462
TUSC2	3	50357458-50357966	0.0321326	0.0245892	0.000408922	0.00572403	-0.0958666	-0.052669	8.19031e-06	0.00962709	0.0800207	-0.0831118	0.0999015	-0.0433869	0.175794	0.172549	4.13556e-11	0	protein_coding	-	ENSG00000114383
TUSC5	17	1182957-1183682	0.034239	NA	9.56787e-06	NA	-0.00849745	NA	0.632639	NA	0.0626322	0.00811692	NA	NA	0.421272	NA	0.502124	NA	protein_coding	+	ENSG00000184811
TUSC5	17	1201545-1204281	0.0264561	0.00891851	0.00141276	0.32592	-0.0281171	0.0119479	0.151947	0.569125	-0.0153476	0.0792651	0.214052	0.201657	0.382824	2.92548e-06	0.485039	7.11744e-11	protein_coding	+	ENSG00000184811
TXLNG	X	16859551-16862642	-0.0488162	-0.0110891	1.19029e-09	0.15401	0.0688957	0.00107948	0.000233092	0.952319	0.089263	0.0338399	0.169487	0.139803	0.163464	5.63461e-05	0.174104	0.0174074	protein_coding	+	ENSG00000086712
UACA	15	70952490-70954035	0.0414964	-0.00972422	4.35702e-06	0.259814	-0.027761	0.00579648	0.176689	0.77115	0.0871986	-0.12606	0.0299161	0.104573	0.0401175	0.163865	4.48235e-09	1.31229e-09	protein_coding	-	ENSG00000137831
UAP1	1	162546567-162546771	0.01889	0.00684028	0.0289405	0.392483	-0.035975	-0.0256033	0.07205	0.16144	0.0147459	-0.0481676	0.189707	0.157575	0.701183	4.93604e-06	0	0.0578875	protein_coding	+	ENSG00000117143
UBA1	X	47067961-47069086	-0.00740192	-0.00314561	0.40304	0.714039	0.0144078	-0.00108433	0.481397	0.95585	0.157851	0.0170357	0.195195	0.25051	0.0174472	7.21164e-08	0.103892	0.117085	protein_coding	+	ENSG00000130985
UBE2H	7	129470572-129474901	-0.0119282	-0.00850494	0.167427	0.247265	0.0198347	0.0189519	0.325113	0.260463	-0.0469893	-0.115113	0.160374	0.165752	0.0952035	4.64497e-06	0.570052	2.47513e-10	protein_coding	-	ENSG00000186591
UBE2O	17	74392209-74392902	0.00443109	-0.00406666	0.615548	0.642293	0.0245755	0.00408397	0.22919	0.837624	0.292025	0.0228711	0.159049	-0.0311877	1.07061e-06	0.0136839	0.0349038	0	protein_coding	-	ENSG00000175931
UBE3C	7	157060279-157062066	-0.00815223	0.000378603	0.381166	0.96266	0.00582065	-0.0307879	0.787767	0.0997952	0.0715575	-0.139301	0.155409	0.246605	0.0506249	2.56657e-07	0.186489	1.65151e-10	protein_coding	+	ENSG00000009335
UBFD1	16	23581801-23585710	0.00616232	-0.0166268	0.487451	0.0506201	-0.00783345	0.042765	0.704046	0.0282539	0.0241583	0.00319648	0.241555	0.154529	0.907157	5.31792e-07	0.361255	6.47802e-11	protein_coding	+	ENSG00000103353
UCK2	1	165876921-165880855	-0.0438902	0.0037932	1.27311e-08	0.658392	0.0247931	0.0207072	0.168791	0.295463	0.016188	-0.0971829	0.0596093	0.0925759	0.183596	0.136433	0.174967	0.0522406	protein_coding	+	ENSG00000143179
UNC5CL	6	40994772-40996334	-0.0259197	-0.0422993	0.00396715	6.46074e-07	0.0634476	0.0113445	0.00218986	0.558211	0.0160173	-0.0360852	0.12088	0.129172	0.808065	0.00419666	0.446791	0	protein_coding	-	ENSG00000124602
UPRT	X	74523240-74524435	-0.0378851	-0.0164514	5.02893e-06	0.0377715	0.00697797	-0.00208071	0.71295	0.908862	-0.0622459	-0.0248343	0.0256568	0.0662643	0.424738	0.386402	0.404329	3.21504e-12	protein_coding	+	ENSG00000094841
URGCP	7	43927014-43929233	-0.00614239	-0.00484537	0.478985	0.525097	0.050299	0.0167427	0.0133886	0.337892	0.119756	0.0166635	0.23804	0.0539059	0.0880442	2.08702e-06	1.78923e-12	0.811316	protein_coding	-	ENSG00000106608
UROS	10	127477852-127478097	-0.0200678	-0.0409716	0.0307489	1.25067e-06	0.0483778	-0.00994296	0.0234934	0.602073	0.0730471	-0.0311787	0.031683	0.151818	0.40121	0.0193868	0.306732	0	protein_coding	-	ENSG00000188690
UTP15	5	72875702-72877794	-0.0430946	-0.0115551	3.45151e-07	0.116477	0.0285959	-0.0209098	0.1383	0.218589	0.0378484	0.0354893	0.0542443	0.106933	0.608976	0.0411295	6.46614e-10	9.69091e-10	protein_coding	+	ENSG00000164338
UTS2	1	7903143-7904010	0.0816089	0.0524014	2.2e-16	7.5473e-12	-0.13083	-0.132243	1.17772e-12	1.53655e-13	0.0251386	-0.0543623	0.0449314	-0.0731069	0.525956	0.247754	0.26691	0.154015	protein_coding	-	ENSG00000049247
VASP	19	46029398-46030236	-0.0468618	-0.0028271	3.06903e-08	0.752766	0.0466618	0.0300365	0.0164773	0.145141	0.0441554	-0.0662025	0.0278272	0.0454104	0.378002	0.647343	1.98239e-09	0.339956	protein_coding	+	ENSG00000125753
VCL	10	75877781-75879918	-0.00771615	0.00602365	0.366667	0.428325	0.0144628	0.00352196	0.474171	0.841231	0.159134	-0.042359	0.120649	0.22858	0.0138874	1.74713e-06	0.308435	0.164627	protein_coding	+	ENSG00000035403
VEGFA	6	43740909-43746501	0.0281685	-0.0277299	0.00144951	0.0014865	-0.013846	-0.00173331	0.498386	0.931067	0.187944	0.0671263	0.248863	0.0985733	0.00143566	7.72937e-06	0.00246461	0.192834	protein_coding	+	ENSG00000112715
VEGFA	6	43746626-43754224	0.0215565	-0.0340044	0.0112061	8.17904e-05	0.000331399	0.0157279	0.986558	0.428815	0.195242	0.0972116	0.254974	0.100672	0.000201745	3.29237e-06	0.440334	1.25924e-11	protein_coding	+	ENSG00000112715
WDR24	16	736744-737416	0.00273735	-0.00796773	0.704745	0.290439	0.00245103	0.0387053	0.88242	0.0248129	0.0536581	0.229222	0.0163428	0.0314871	8.72824e-06	0.763419	4.18195e-09	0.19867	protein_coding	-	ENSG00000127580
WDR45B	17	80572438-80573901	-0.0223325	-0.0140134	0.00717717	0.110378	0.00927879	-0.00113814	0.632406	0.955485	-0.024246	-0.024287	0.0894626	0.276154	0.814969	6.62586e-06	0.0683243	2.37444e-18	protein_coding	-	ENSG00000141580
WDR81	17	1628254-1631920	0.0366402	0.0227815	1.94307e-06	0.0025239	0.00389072	0.0217438	0.824208	0.203764	0.0576383	0.0123219	0.124435	-0.09621	0.458678	0.00686352	0.210357	0.18575	protein_coding	+	ENSG00000167716
WDR81	17	1634049-1634239	0.0382254	0.0175563	3.88506e-06	0.0310504	0.00202293	0.0252457	0.915121	0.172799	0.0257271	0.0410036	0.0371746	-0.0543807	0.663773	0.489648	0	0	protein_coding	+	ENSG00000167716
WEE1	11	9609996-9611298	0.000975467	0.0199377	0.91555	0.0302544	-0.0526376	-0.112601	0.0138366	1.80631e-07	-0.0567309	-0.054161	-0.0074399	0.206951	0.406605	0.00424462	0.148892	0	protein_coding	+	ENSG00000166483
WHSC1L1	8	38173935-38175556	-0.0537159	-0.00964037	1.51128e-09	0.230737	0.0409782	-0.0112698	0.04317	0.538553	-0.0161382	0.168314	-0.116084	0.168973	0.020595	0.000863932	8.49267e-10	7.16594e-09	protein_coding	-	ENSG00000147548
WHSC1L1	8	38177273-38178690	-0.0567816	-0.00671412	3.13696e-11	0.358693	0.00906559	-0.00240876	0.637053	0.885855	0.0253834	0.0152063	0.0530112	-0.0266861	0.84867	0.464305	0	0.0933655	protein_coding	-	ENSG00000147548
WNK1	12	936208-936667	0.0125028	0.00845606	0.11689	0.17651	-0.00402855	0.0180035	0.82706	0.206875	-0.0741665	0.00548711	0.00345646	-0.204854	0.334012	8.25972e-06	0.0625001	0	protein_coding	+	ENSG00000060237
XPO5	6	43490072-43491743	-0.0474102	-0.0178676	1.79593e-08	0.0240165	0.0656451	0.0103664	0.00069236	0.566066	0.140221	0.139327	0.0330395	0.10871	0.00130818	0.089538	6.61472e-11	0.128753	protein_coding	-	ENSG00000124571
YPEL2	17	57474462-57479095	0.0521844	-0.0103505	3.0167e-10	0.141773	-0.0846382	0.00779251	1.01999e-05	0.629859	-0.123563	-0.150066	0.0779276	-0.043358	0.00119361	0.154133	0.332438	0.174979	protein_coding	+	ENSG00000175155
ZBTB16	11	113930315-113930604	0.0526233	0.04997	9.88779e-10	3.0337e-09	-0.0973413	-0.109282	9.04195e-07	2.39554e-08	-0.0641859	-0.0362522	0.0403219	-0.0779667	0.386573	0.311228	1.52459e-10	0	protein_coding	+	ENSG00000109906
ZBTB16	11	113933933-113935290	0.0635572	0.0594444	4.97158e-13	7.50955e-13	-0.114456	-0.129656	2.19274e-08	1.30798e-11	-0.0556057	-0.028525	-0.0411041	-0.0299263	0.517696	0.599269	0.0150069	0.0208369	protein_coding	+	ENSG00000109906
ZBTB16	11	114027059-114027156	0.0601509	0.0546197	7.36744e-12	2.65159e-10	-0.104736	-0.111701	2.69094e-07	1.79297e-08	-0.157777	-0.0617119	0.00272845	0.0089808	0.00806018	0.98575	0.173234	0.000133837	protein_coding	+	ENSG00000109906
ZBTB16	11	114057674-114060486	0.048565	0.0412755	6.09178e-08	1.0347e-06	-0.0860331	-0.10927	4.26402e-05	2.57383e-08	-0.158805	-0.0170464	-0.0645149	0.0334482	0.0192377	0.417966	1.9736e-09	0.404763	protein_coding	+	ENSG00000109906
ZBTB16	11	114112889-114113059	0.0593809	0.052913	4.08331e-11	2.74831e-09	-0.106956	-0.130176	3.46783e-07	3.34242e-10	-0.123657	-0.0377976	-0.0270997	-0.0222587	0.0704493	0.814955	0.224326	0.208324	protein_coding	+	ENSG00000109906
ZBTB16	11	114117512-114118087	0.0563425	0.0507408	2.47319e-10	8.45146e-09	-0.118745	-0.119793	1.31322e-08	4.62233e-09	-0.0776797	-0.0748663	-0.012593	-0.0186325	0.166476	0.920314	0.170975	0.00738427	protein_coding	+	ENSG00000109906
ZBTB16	11	114121048-114121398	0.0611502	0.0537347	1.80078e-12	9.94764e-10	-0.124512	-0.131256	1.02571e-09	1.64518e-10	-0.072816	-0.0826134	-0.0682562	-0.0285953	0.140322	0.395297	0.10766	0.116626	protein_coding	+	ENSG00000109906
ZC3H7B	22	41753181-41756151	0.0223738	0.0397406	0.00835517	5.88616e-06	-0.0352587	-0.0425806	0.0724483	0.033281	0.0449173	0.121167	0.120597	0.221784	0.071981	5.6235e-05	9.73047e-12	0.04617	protein_coding	+	ENSG00000100403
ZFP36	19	39898383-39900045	0.00076888	-0.00170476	0.930862	0.85338	0.0251445	-0.0238058	0.219608	0.26277	0.240165	-0.174188	0.0525124	0.00475781	3.79462e-06	0.662385	2.49073e-17	0.106007	protein_coding	+	ENSG00000128016
ZFP36L2	2	43449541-43452891	0.0413409	-0.0032487	1.77253e-06	0.709321	-0.020098	-0.046345	0.315296	0.0218984	0.0687665	-0.0404127	0.0761867	-0.0447553	0.372941	0.315645	0.0117116	0	protein_coding	-	ENSG00000152518
ZFP36L2	2	43453404-43453748	0.0369707	0.00173799	6.54647e-06	0.835316	-0.00393244	0.00586575	0.833951	0.758638	0.0732302	-0.0646837	0.0789051	-0.0749417	0.194256	0.149202	5.9283e-14	0.195435	protein_coding	-	ENSG00000152518
ZHX1-C8ORF76	8	124243540-124243997	-0.0409628	-0.0318538	4.16175e-06	9.34259e-05	0.0529216	0.000598911	0.0100861	0.974098	-0.0094954	0.0289869	0.080446	-0.0115475	0.882203	0.278199	0.121173	0.222919	protein_coding	-	ENSG00000259305
ZKSCAN2	16	25247326-25252059	0.0543804	0.00693802	1.39275e-09	0.396212	0.0117757	0.00700487	0.566818	0.708471	-0.0105183	0.0432051	-0.0241077	0.0772393	0.763657	0.344508	0.415972	0.695115	protein_coding	-	ENSG00000155592
ZMYM3	X	70462020-70462274	0.0148804	-0.0138851	0.100244	0.142965	-0.018399	-0.00211907	0.380878	0.922283	0.06216	-0.0135616	0.291006	0.015924	0.544474	7.86914e-06	0	7.13374e-09	protein_coding	-	ENSG00000147130
ZMYM3	X	70467195-70467756	0.0140879	0.00356556	0.12152	0.667295	-0.0014439	0.0268788	0.945436	0.155484	0.137169	-0.0251326	0.24172	-0.108641	0.0527996	5.98735e-06	0.32365	0.312152	protein_coding	-	ENSG00000147130
ZNF142	2	219506751-219509787	-0.00113054	0.00630682	0.900479	0.421298	0.0270206	0.0279385	0.200155	0.118711	0.216212	-0.00860579	0.22631	0.0657703	0.000826567	8.83627e-06	0.318185	0.263632	protein_coding	-	ENSG00000115568
ZNF184	6	27418522-27421039	-0.0442006	-0.0218192	3.30943e-07	0.0054991	0.0428789	0.0146602	0.0310704	0.417618	0.0929163	-0.125607	0.019307	-0.0918755	0.0280243	0.216838	0	0.302569	protein_coding	-	ENSG00000096654
ZNF354A	5	178138593-178140622	-0.055296	-0.0122776	2.06819e-11	0.127781	0.0480153	-0.00449785	0.0110737	0.809325	0.188225	0.0464164	0.121205	0.0578018	0.000811673	0.0289134	0.112949	0.0162971	protein_coding	-	ENSG00000169131
ZNF384	12	6797869-6798062	-0.00919493	-0.0186093	0.28721	0.0426157	-0.0364105	0.0415363	0.0666076	0.0483309	0.100026	-0.0793539	0.286869	-0.0275492	0.0823539	5.8991e-06	0.0274284	2.74626e-09	protein_coding	-	ENSG00000126746
ZNF609	15	64973891-64978264	-0.0414337	-0.0153357	3.89693e-06	0.0821128	0.0660815	0.103014	0.00148702	4.95935e-07	0.14875	-0.0663535	0.201706	-0.0155036	0.0198757	0.00131988	2.36728e-10	0.131761	protein_coding	+	ENSG00000180357
ZNF641	12	48733791-48737510	-0.011839	-0.00956282	0.155183	0.205661	0.0364456	0.023432	0.0614662	0.175065	0.1249	0.052865	0.232754	0.0350041	0.0360519	3.81697e-06	0.0516045	0.418502	protein_coding	-	ENSG00000167528
ZNF74	22	20759667-20762745	-0.048999	-0.0376418	1.91984e-08	2.14649e-05	0.0902127	0.0316989	9.26334e-06	0.117612	0.159084	0.0938645	0.196268	0.115778	0.00356313	0.000216274	0.0753274	0.0194982	protein_coding	+	ENSG00000185252
ZNF821	16	71893589-71894575	-0.0376277	-0.00707272	2.52714e-06	0.336757	0.0713569	-0.0175106	0.000107426	0.298471	-0.0293515	0.173155	-0.0402618	0.149811	0.00589552	0.00897004	0.100643	1.50079e-12	protein_coding	-	ENSG00000102984
ENSG00000181877	4	1193480-1195204	0.00413692	-0.0156767	0.654078	0.0834856	-0.00266987	0.0127957	0.90078	0.536065	0.035028	0.0777041	0.126654	0.268777	0.373959	3.72562e-06	0	0	NA	NA	ENSG00000181877
ENSG00000205036	16	88632967-88634203	-0.00540729	-0.00745857	0.548451	0.43135	0.0964145	0.011839	4.50996e-06	0.585431	0.00441174	0.0421919	0.0339824	-0.0475538	0.781914	0.66255	0.416451	8.68182e-08	NA	NA	ENSG00000205036
ENSG00000233165	10	88728799-88728935	0.0453993	0.00451149	1.14753e-06	0.613149	-0.0514456	-0.0731811	0.0165009	0.000419255	0.0130588	-0.00896101	-0.0392058	0.0539932	0.966863	0.549783	0	2.55412e-17	NA	NA	ENSG00000233165
ENSG00000233165	10	88729020-88729158	0.0456319	0.00602179	1.20342e-07	0.46961	-0.076072	-0.0857544	0.000117885	9.43975e-06	0.036878	-0.0409972	-0.0192857	0.0465039	0.626219	0.673415	1.80971e-10	0.0520539	NA	NA	ENSG00000233165
ENSG00000235167	20	36120874-36121351	0.0489574	-0.00453714	8.0881e-08	0.614174	-0.0153543	-0.0179735	0.462616	0.384175	0.00939584	-0.0552701	-0.0332479	0.0787718	0.662133	0.384255	0.0681869	0	NA	NA	ENSG00000235167

## Sheet: Table S2. Literature replicabil
	Fat (367 signif genes in HF)			Skin (79 signif genes in HF)			Study
PUBMED	%Overlap	N Overlap	P	%Overlap	N Overlap	P	Number genes	Median overlap W/ literature	Replic / Total	species	Tissue	Sample	Sex	Platform	Intervention	Study
15941876	0.0126582	1	0.769154	0	0	0.268955	79	0.03	0.86	human	abdominal subcutaneous adipose tissue	23	Women	Microarray	CR	10 weeks of calorie restriction (600 kcal/d less than daily energy required). Mean differences in expression before and after diet validated with RT-qPCR. Obese subjects recruited among eight European clinical centers were followed up 10 wk of either a low-fat (high carbohydrate) or a moderate-fat (low carbohydrate) hypoenergetic diet.
D28793995	0.0146628	5	0.75284	0.0126582	1	0.743658	341	0.05	0.41	human	abdominal subcutaneous adipose tissue	191	Both	RNA-Seq Discovery + RT-qPCR replication	CR	800Kcal for 8 wk. Overweight or obese nondiabetic subjects from 8 european countries. 191 Discovery and 350 Replication individuals with matched RNA samples. Mean differences adjusted for sex, age, and center using Dseq. Only Subset of genes associated wth BMI
18782868	0.0544959	20	0.00609358	0.0379747	3	0.409237	586	0.06	0.68	human	abdominal subcutaneous adipose tissue	47	Women	RT-qPCR/Microarray	CR	10 weeks of calorie restriction (600 kcal/d less than daily energy required). Mean differences in expression before and after diet. Obese subjects recruited among eight European clinical centers were followed up 10 wk of either a low-fat (high carbohydrate) or a moderate-fat (low carbohydrate) hypoenergetic diet.
26486851	0	0	0.256539	0	0	0.0613841	16	0	0.88	human	abdominal subcutaneous adipose tissue	8	Both	Microarray	CR	Six month at 25% or 12% calorie restriction within a RCT of healthy overweigth individuals. Mean differences between control and intervention of the log-transformed to base 2, quantile-normalized, and adjusted for sex, race, and age expression levels.
23028366	0	0	0.581665	0	0	0.169919	47	0.02	0.57	human	abdominal subcutaneous adipose tissue	311	Both	RT-qPCR	DR	8 weeks of 800-1200Kcal diet for obsese and overweight individuals. 271 genes were analysed using massivelly parallel RT-qPCR selected according to these criteria: regulation during dietary weight loss programs [12]–[14] and differential expression according to the presence or absence of obesity and metabolic syndrome [15-16].
CR23341572	0	0	0.153561	0	0	0.0350003	9	0	0.78	human	abdominal subcutaneous adipose tissue	8	females	Microarray	CR	6 months months of 1,200 to 2,000 kcal restricted diet. diet intervention (n = 8), the exercise intervention (n = 14), the diet + exercise intervention (n = 16), or the control group (n = 7). In the first candidate gene analysis, microarray data from 45 participants were used to compare changes in expression between baseline and 6 months, for 82 candidate genes. Difference in mean of these differ…
CR23341572	0	0	0.334799	0	0	0.083431	22	0	0.64	human	abdominal subcutaneous adipose tissue	8	females	Microarray	WL	6 months months of 1,200 to 2,000 kcal restricted diet. diet intervention (n = 8), the exercise intervention (n = 14), the diet + exercise intervention (n = 16), or the control group (n = 7). In the first candidate gene analysis, microarray data from 45 participants were used to compare changes in expression between baseline and 6 months, for 82 candidate genes. Difference in mean of these differ…
23512807	0.0535714	3	0.083472	0.0178571	1	0.19904	56	0.05	0.84	human	skeletal muscle	26	Both	RT-PCR	F	48h of fasting. Mean differences in expression before and after fasting of 56 genes across multiple pathways measured using RT-PCR
23601134	0.125	2	0.0340089	0	0	0.0613841	16	0.06	0.88	human	skeletal muscle	15	Both	Microarray	CR	4-20 yrs of 30% calorie restriction. Differences in mean between 15 CR and 15 AL individuals.
25249505	0.0909091	1	0.184355	0.181818	2	0.000827964	11	0	0.91	human	skeletal muscle	12	man	Microarray	F	24h fast. Blood samples were taken after breakfast (postmeal, t = 90 min) and after 10 and 24 h of fasting by the means of an intravenous cannula, which was inserted in the elbow just before breakfast. Muscle biopsies from musculus vastus lateralis were collected after breakfast (baseline, t = 105 min) and after 10 and 24 h of fasting under localized 1% lidocain anesthesia.
18804985	0.0365854	3	0.190899	0	0	0.277618	82	0.04	0.73	human	liver	4	Women	Microarray	CR	8 week of 1200kcal. Difference in means between 4 diet and 4 control individuals. The microarray data was validated by performing relative quantitative real-time PCR (qRT-PCR) using liver samples from seven intervention subjects and eight control subjects, including the samples used in the microarray analysis.
21147860	0.0735294	5	0.00820619	0.0147059	1	0.236303	68	0.03	0.44	human	rectosigmoid mucosa	10	Women	Microarray	CR	3 days of 50% of calorie restriction followed by low calorie diet of 782 kcal/d. Samples were collected before and after diet from 10 obese premenopausal women. Mean differences before and after CR were assessed.
28319853	0.0245232	9	0.86224	0.0253165	2	0.742032	663	0.04	0.48	human	whole blood	7	Both	Microarray	RF	Area under the gene expression response curve to 3 high-fat meals after a overnight fast, with at least 1 week of interval btw meals. The randomized crossover study included seven normal weight and seven obese men consuming three doses (500/1000/1500 kcal) of a high-fat meal.
17991667	0.0435967	16	0.560708	0.0253165	2	0.870087	885	0.04	0.44	human	PBMC	4	Male	Microarray	F	24 and 48h of fasting. Blood at baseline, 24h and 48h was drawn and after 2 months the procedure was repeated. Mean difference between baseline, 24h and 48h. RT—qPCR validation on the second visit.
11309484	0.0221239	5	0.40028	0.0126582	1	0.593246	226	0.03	0.54	monkey	skeletal muscle	3	Male	Microarray	CR	9 yrs of 30% Caloric restriction. Mean differences between all pairs of CR and AL individuals.
20814446	0.0227273	1	0.557708	0	0	0.159982	44	0.02	0.48	monkey	pituitary	10	Male	Microarray	CR	8 yrs of 30% caloric restriction. Difference in means between CR and AL at 12yrs
F19366786	0.277929	102	0.00582536	0.329114	26	0.0176594	4424	0.3	0.74	pig	Fat	12	females	Microarray	F	3 days of Fasting. Difference in means between CR and AL using randomized blocks design with and without melanocortin-4 receptor D298N variant
L19366786	0.0980926	36	0.023218	0.101266	8	0.182111	1390	0.14	0.77	pig	Liver	12	females	Microarray	F	3 days of Fasting. Difference in means between CR and AL using randomized blocks design with and without melanocortin-4 receptor D298N variant
F19939971	0.26703	98	6.71328e-05	0.202532	16	0.392272	3710	0.29	0.81	pig	Fat	10	females	Microarray	CR	8 days of 20% Caloric restriction. Difference in means between CR and AL using randomized blocks design of low and high residual feeding intake
L19939971	0.030837	7	0.125504	0.0379747	3	0.0609108	227	0.04	0.86	pig	Liver	10	females	Microarray	CR	8 days of 20% Caloric restriction. Difference in means between CR and AL using randomized blocks design of low and high residual feeding intake
28539586	0.0358974	7	0.0687028	0	0	0.53955	195	0.03	0.52	sheep	whole blood	12	females	RNA-Seq	CR	15 days of 60% caloric restriction. Mean differences of samples collected before and after CR.
29121875	0.0241935	3	0.398316	0	0	0.388774	124	0.02	0.38	bovine	hypothalamus	40	females	Microarray	CR	18 days of 60% caloric restriction, difference in means between control and CR, females
22327899	0.0988372	17	1.98319e-08	0.151899	12	3.45514e-12	172	0.04	0.7	Mouse, Rat, Wild Boar	N.A.	N.A.	N.A.	Microarray	CR	Meta-analysis of directionally consistent genes
22912585	0.0387597	5	0.0892822	0.0126582	1	0.400826	129	0.04	0.54	Yeast, Worm, Fly, Mouse	N.A.	N.A.	N.A.	N.A.	CR	Gene knockouts that abrrogate life extension by caloric restriction
22210149	0.0871935	32	1.49913e-06	0.164557	13	2.70871e-06	687	0.1	0.69	Mice, Rat	Multiple tissues	N.A.	N.A.	Microarray	CR	Meta-analysis of gene expression effect sizes across harmonized microarray data. Directionally consistent across tissues and strains
Total	0.53	194	5.6e-06	0.57	45	0.00380012	8288
Legend	CR – calorie restriction, WL – weight loss, F – fasting, DR – diet response, RF – Area under the expression response curve to 3 high fat meals after overnight fast

## Sheet: Table S3. Gene Replicability
Tissue	Gene_Symbol	GeneName	#Human studies	#Non-human studies	Replication status
Skin	ENSG00000223947	AC016738.4	0	0	Novel
Skin	ENSG00000124942	AHNAK	0	0	Novel
Skin	ENSG00000159423	ALDH4A1	0	3	Nonhumans only
Skin	ENSG00000171388	APLN	0	1	Nonhumans only
Skin	ENSG00000133794	ARNTL	0	3	Nonhumans only
Skin	ENSG00000117411	B4GALT2	0	0	Novel
Skin	ENSG00000108641	B9D1	0	2	Nonhumans only
Skin	ENSG00000141376	BCAS3	0	0	Novel
Skin	ENSG00000123095	BHLHE41	0	1	Nonhumans only
Skin	ENSG00000104765	BNIP3L	0	2	Nonhumans only
Skin	ENSG00000162813	BPNT1	0	2	Nonhumans only
Skin	ENSG00000168000	BSCL2	0	1	Nonhumans only
Skin	ENSG00000151135	C12orf23	0	3	Nonhumans only
Skin	ENSG00000174456	C12orf76	0	0	Novel
Skin	ENSG00000159208	C1orf51	0	0	Novel
Skin	ENSG00000180044	C3orf80	0	0	Novel
Skin	ENSG00000107159	CA9	0	0	Novel
Skin	ENSG00000004660	CAMKK1	1	1	Across Taxa
Skin	ENSG00000112576	CCND3	0	0	Novel
Skin	ENSG00000100422	CERK	0	0	Novel
Skin	ENSG00000121671	CRY2	0	1	Nonhumans only
Skin	ENSG00000105516	DBP	0	4	Nonhumans only
Skin	ENSG00000119522	DENND1A	0	0	Novel
Skin	ENSG00000168724	DNAJC21	0	1	Nonhumans only
Skin	ENSG00000134153	EMC7	0	2	Nonhumans only
Skin	ENSG00000111405	ENDOU	0	0	Novel
Skin	ENSG00000164687	FABP5	1	3	Across Taxa
Skin	ENSG00000114023	FAM162A	0	2	Nonhumans only
Skin	ENSG00000158246	FAM46B	0	0	Novel
Skin	ENSG00000145982	FARS2	0	2	Nonhumans only
Skin	ENSG00000096060	FKBP5	0	2	Nonhumans only
Skin	ENSG00000258920	FOXN3-AS1	0	0	Novel
Skin	ENSG00000250208	FZD10-AS1	0	0	Novel
Skin	ENSG00000116717	GADD45A	1	1	Across Taxa
Skin	ENSG00000115486	GGCX	0	0	Novel
Skin	ENSG00000101216	GMEB2	0	0	Novel
Skin	ENSG00000152133	GPATCH11	1	0	Humans only
Skin	ENSG00000006704	GTF2IRD1	0	1	Nonhumans only
Skin	ENSG00000172534	HCFC1	0	1	Nonhumans only
Skin	ENSG00000152804	HHEX	0	0	Novel
Skin	ENSG00000016402	IL20RA	0	0	Novel
Skin	ENSG00000142687	KIAA0319L	0	1	Nonhumans only
Skin	ENSG00000162849	KIF26B	0	3	Nonhumans only
Skin	ENSG00000119138	KLF9	0	4	Nonhumans only
Skin	ENSG00000147036	LANCL3	0	0	Novel
Skin	ENSG00000176454	LPCAT4	0	2	Nonhumans only
Skin	ENSG00000070444	MNT	0	2	Nonhumans only
Skin	ENSG00000141562	NARF	0	1	Nonhumans only
Skin	ENSG00000160194	NDUFV3	0	0	Novel
Skin	ENSG00000165030	NFIL3	1	1	Across Taxa
Skin	ENSG00000170485	NPAS2	0	1	Nonhumans only
Skin	ENSG00000126368	NR1D1	0	2	Nonhumans only
Skin	ENSG00000174738	NR1D2	1	0	Humans only
Skin	ENSG00000085465	OVGP1	0	0	Novel
Skin	ENSG00000122884	P4HA1	0	2	Nonhumans only
Skin	ENSG00000179094	PER1	1	4	Across Taxa
Skin	ENSG00000132326	PER2	0	3	Nonhumans only
Skin	ENSG00000049246	PER3	0	0	Novel
Skin	ENSG00000116711	PLA2G4A	2	0	Humans only
Skin	ENSG00000143847	PPFIA4	0	0	Novel
Skin	ENSG00000183010	PYCR1	0	2	Nonhumans only
Skin	ENSG00000132005	RFX1	0	0	Novel
Skin	ENSG00000087903	RFX2	0	0	Novel
Skin	ENSG00000236266	RP3-467L1.4	0	0	Novel
Skin	ENSG00000157637	SLC38A10	0	0	Novel
Skin	ENSG00000063176	SPHK2	1	1	Across Taxa
Skin	ENSG00000115525	ST3GAL5	0	1	Nonhumans only
Skin	ENSG00000167074	TEF	0	0	Novel
Skin	ENSG00000126351	THRA	0	1	Nonhumans only
Skin	ENSG00000057704	TMCC3	0	0	Novel
Skin	ENSG00000137103	TMEM8B	0	0	Novel
Skin	ENSG00000118194	TNNT2	0	0	Novel
Skin	ENSG00000157514	TSC22D3	0	4	Nonhumans only
Skin	ENSG00000131462	TUBG1	1	2	Across Taxa
Skin	ENSG00000124602	UNC5CL	0	0	Novel
Skin	ENSG00000188690	UROS	0	1	Nonhumans only
Skin	ENSG00000049247	UTS2	0	0	Novel
Skin	ENSG00000109906	ZBTB16	0	2	Nonhumans only
Skin	ENSG00000100403	ZC3H7B	1	1	Across Taxa
Fat	ENSG00000023839	ABCC2	0	1	Nonhumans only
Fat	ENSG00000164163	ABCE1	0	1	Nonhumans only
Fat	ENSG00000033050	ABCF2	1	0	Humans only
Fat	ENSG00000160179	ABCG1	0	0	Novel
Fat	ENSG00000230259	AC008738.1	0	0	Novel
Fat	ENSG00000225057	AC096574.4	0	0	Novel
Fat	ENSG00000236530	AC097711.1	0	0	Novel
Fat	ENSG00000129048	ACKR4	0	0	Novel
Fat	ENSG00000123983	ACSL3	1	1	Across Taxa
Fat	ENSG00000107796	ACTA2	1	0	Humans only
Fat	ENSG00000180139	ACTA2-AS1	0	0	Novel
Fat	ENSG00000135503	ACVR1B	0	2	Nonhumans only
Fat	ENSG00000135074	ADAM19	0	0	Novel
Fat	ENSG00000154734	ADAMTS1	0	1	Nonhumans only
Fat	ENSG00000140470	ADAMTS17	0	3	Nonhumans only
Fat	ENSG00000140873	ADAMTS18	0	0	Novel
Fat	ENSG00000158859	ADAMTS4	0	0	Novel
Fat	ENSG00000154736	ADAMTS5	1	0	Humans only
Fat	ENSG00000173175	ADCY5	0	0	Novel
Fat	ENSG00000170214	ADRA1B	0	0	Novel
Fat	ENSG00000151303	AGAP11	1	0	Humans only
Fat	ENSG00000086848	ALG9	2	2	Across Taxa
Fat	ENSG00000258529	ALG9	0	0	Novel
Fat	ENSG00000178038	ALS2CL	0	0	Novel
Fat	ENSG00000242110	AMACR	1	3	Across Taxa
Fat	ENSG00000106524	ANKMY2	0	1	Nonhumans only
Fat	ENSG00000101745	ANKRD12	0	2	Nonhumans only
Fat	ENSG00000154065	ANKRD29	0	2	Nonhumans only
Fat	ENSG00000255176	AP002954.3	0	0	Novel
Fat	ENSG00000171388	APLN	0	1	Nonhumans only
Fat	ENSG00000186466	AQP7P1	0	0	Novel
Fat	ENSG00000088756	ARHGAP28	0	0	Novel
Fat	ENSG00000241484	ARHGAP8	0	0	Novel
Fat	ENSG00000122644	ARL4A	0	3	Nonhumans only
Fat	ENSG00000133794	ARNTL	0	3	Nonhumans only
Fat	ENSG00000162174	ASRGL1	0	1	Nonhumans only
Fat	ENSG00000168874	ATOH8	0	0	Novel
Fat	ENSG00000133657	ATP13A3	0	0	Novel
Fat	ENSG00000198604	BAZ1A	0	2	Nonhumans only
Fat	ENSG00000171791	BCL2	0	1	Nonhumans only
Fat	ENSG00000134107	BHLHE40	0	3	Nonhumans only
Fat	ENSG00000123095	BHLHE41	0	1	Nonhumans only
Fat	ENSG00000102010	BMX	0	1	Nonhumans only
Fat	ENSG00000133639	BTG1	0	2	Nonhumans only
Fat	ENSG00000186265	BTLA	0	0	Novel
Fat	ENSG00000136261	BZW2	0	0	Novel
Fat	ENSG00000187479	C11orf96	0	0	Novel
Fat	ENSG00000174206	C12orf66	0	0	Novel
Fat	ENSG00000167173	C15orf39	0	0	Novel
Fat	ENSG00000186665	C17orf58	0	0	Novel
Fat	ENSG00000131943	C19orf12	1	3	Across Taxa
Fat	ENSG00000159208	C1orf51	0	0	Novel
Fat	ENSG00000173918	C1QTNF1	0	0	Novel
Fat	ENSG00000082196	C1QTNF3	0	1	Nonhumans only
Fat	ENSG00000181744	C3orf58	0	2	Nonhumans only
Fat	ENSG00000174749	C4orf32	0	2	Nonhumans only
Fat	ENSG00000146826	C7orf43	0	0	Novel
Fat	ENSG00000189376	C8orf76	0	1	Nonhumans only
Fat	ENSG00000004660	CAMKK1	1	1	Across Taxa
Fat	ENSG00000110619	CARS	1	1	Across Taxa
Fat	ENSG00000129993	CBFA2T3	0	0	Novel
Fat	ENSG00000166510	CCDC68	0	0	Novel
Fat	ENSG00000112576	CCND3	0	0	Novel
Fat	ENSG00000245848	CEBPA	0	2	Nonhumans only
Fat	ENSG00000003402	CFLAR	1	2	Across Taxa
Fat	ENSG00000175040	CHST2	0	0	Novel
Fat	ENSG00000074054	CLASP1	0	0	Novel
Fat	ENSG00000113240	CLK4	1	2	Across Taxa
Fat	ENSG00000107864	CPEB3	0	0	Novel
Fat	ENSG00000165934	CPSF2	0	3	Nonhumans only
Fat	ENSG00000095794	CREM	1	2	Across Taxa
Fat	ENSG00000145708	CRHBP	1	0	Humans only
Fat	ENSG00000121671	CRY2	0	1	Nonhumans only
Fat	ENSG00000171793	CTPS1	0	0	Novel
Fat	ENSG00000142973	CYP4B1	0	2	Nonhumans only
Fat	ENSG00000186160	CYP4Z1	0	0	Novel
Fat	ENSG00000105516	DBP	0	4	Nonhumans only
Fat	ENSG00000168209	DDIT4	2	1	Across Taxa
Fat	ENSG00000204580	DDR1	0	4	Nonhumans only
Fat	ENSG00000165732	DDX21	0	2	Nonhumans only
Fat	ENSG00000174485	DENND4A	0	0	Novel
Fat	ENSG00000153933	DGKE	0	0	Novel
Fat	ENSG00000162496	DHRS3	0	3	Nonhumans only
Fat	ENSG00000132002	DNAJB1	0	0	Novel
Fat	ENSG00000197959	DNM3	0	1	Nonhumans only
Fat	ENSG00000088387	DOCK9	0	2	Nonhumans only
Fat	ENSG00000120875	DUSP4	0	0	Novel
Fat	ENSG00000135636	DYSF	0	1	Nonhumans only
Fat	ENSG00000074266	EED	0	0	Novel
Fat	ENSG00000103319	EEF2K	0	0	Novel
Fat	ENSG00000134954	ETS1	0	0	Novel
Fat	ENSG00000138190	EXOC6	0	1	Nonhumans only
Fat	ENSG00000108799	EZH1	0	0	Novel
Fat	ENSG00000197798	FAM118B	0	1	Nonhumans only
Fat	ENSG00000124019	FAM124B	0	0	Novel
Fat	ENSG00000183807	FAM162B	0	0	Novel
Fat	ENSG00000047346	FAM214A	0	0	Novel
Fat	ENSG00000158246	FAM46B	0	0	Novel
Fat	ENSG00000197872	FAM49A	0	0	Novel
Fat	ENSG00000188522	FAM83G	0	0	Novel
Fat	ENSG00000158169	FANCC	0	0	Novel
Fat	ENSG00000183580	FBXL7	1	0	Humans only
Fat	ENSG00000114279	FGF12	0	0	Novel
Fat	ENSG00000179431	FJX1	0	0	Novel
Fat	ENSG00000096060	FKBP5	0	2	Nonhumans only
Fat	ENSG00000136068	FLNB	0	2	Nonhumans only
Fat	ENSG00000102755	FLT1	0	0	Novel
Fat	ENSG00000229515	FLT1P1	0	0	Novel
Fat	ENSG00000137942	FNBP1L	0	2	Nonhumans only
Fat	ENSG00000065970	FOXJ2	0	1	Nonhumans only
Fat	ENSG00000150907	FOXO1	0	2	Nonhumans only
Fat	ENSG00000118689	FOXO3	0	0	Novel
Fat	ENSG00000151474	FRMD4A	0	0	Novel
Fat	ENSG00000174804	FZD4	1	1	Across Taxa
Fat	ENSG00000177283	FZD8	0	1	Nonhumans only
Fat	ENSG00000099860	GADD45B	0	3	Nonhumans only
Fat	ENSG00000141441	GAREM	0	0	Novel
Fat	ENSG00000234741	GAS5	1	0	Humans only
Fat	ENSG00000001084	GCLC	0	3	Nonhumans only
Fat	ENSG00000106415	GLCCI1	0	0	Novel
Fat	ENSG00000176533	GNG7	0	2	Nonhumans only
Fat	ENSG00000152133	GPATCH11	1	0	Humans only
Fat	ENSG00000069122	GPR116	1	0	Humans only
Fat	ENSG00000170775	GPR37	0	0	Novel
Fat	ENSG00000177464	GPR4	0	1	Nonhumans only
Fat	ENSG00000155324	GRAMD3	0	0	Novel
Fat	ENSG00000106070	GRB10	0	1	Nonhumans only
Fat	ENSG00000131149	GSE1	0	3	Nonhumans only
Fat	ENSG00000153767	GTF2E1	0	0	Novel
Fat	ENSG00000108840	HDAC5	0	0	Novel
Fat	ENSG00000138411	HECW2	0	0	Novel
Fat	ENSG00000114735	HEMK1	0	0	Novel
Fat	ENSG00000152804	HHEX	0	0	Novel
Fat	ENSG00000124440	HIF3A	0	1	Nonhumans only
Fat	ENSG00000010818	HIVEP2	0	2	Nonhumans only
Fat	ENSG00000159399	HK2	2	1	Across Taxa
Fat	ENSG00000228612	HK2P1	0	0	Novel
Fat	ENSG00000108924	HLF	0	0	Novel
Fat	ENSG00000112972	HMGCS1	1	4	Across Taxa
Fat	ENSG00000095066	HOOK2	1	2	Across Taxa
Fat	ENSG00000132622	HSPA12B	0	0	Novel
Fat	ENSG00000067064	IDI1	1	5	Across Taxa
Fat	ENSG00000169991	IFFO2	0	0	Novel
Fat	ENSG00000006652	IFRD1	0	2	Nonhumans only
Fat	ENSG00000160712	IL6R	0	0	Novel
Fat	ENSG00000151689	INPP1	0	0	Novel
Fat	ENSG00000119669	IRF2BPL	0	2	Nonhumans only
Fat	ENSG00000066583	ISOC1	0	3	Nonhumans only
Fat	ENSG00000135424	ITGA7	1	2	Across Taxa
Fat	ENSG00000086544	ITPKC	0	0	Novel
Fat	ENSG00000116396	KCNC4	0	1	Nonhumans only
Fat	ENSG00000189367	KIAA0408	0	1	Nonhumans only
Fat	ENSG00000155090	KLF10	1	4	Across Taxa
Fat	ENSG00000172059	KLF11	2	1	Across Taxa
Fat	ENSG00000169926	KLF13	0	1	Nonhumans only
Fat	ENSG00000163884	KLF15	0	3	Nonhumans only
Fat	ENSG00000119138	KLF9	0	4	Nonhumans only
Fat	ENSG00000003096	KLHL13	0	0	Novel
Fat	ENSG00000162413	KLHL21	0	0	Novel
Fat	ENSG00000183655	KLHL25	0	0	Novel
Fat	ENSG00000167487	KLHL26	0	0	Novel
Fat	ENSG00000182481	KPNA2	1	2	Across Taxa
Fat	ENSG00000143815	LBR	0	2	Nonhumans only
Fat	ENSG00000106852	LHX6	0	1	Nonhumans only
Fat	ENSG00000113594	LIFR	0	1	Nonhumans only
Fat	ENSG00000071282	LMCD1	0	1	Nonhumans only
Fat	ENSG00000143013	LMO4	1	3	Across Taxa
Fat	ENSG00000072201	LNX1	0	0	Novel
Fat	ENSG00000175556	LONRF3	0	0	Novel
Fat	ENSG00000132793	LPIN3	0	0	Novel
Fat	ENSG00000173621	LRFN4	0	0	Novel
Fat	ENSG00000171236	LRG1	0	2	Nonhumans only
Fat	ENSG00000128594	LRRC4	0	0	Novel
Fat	ENSG00000143353	LYPLAL1	0	0	Novel
Fat	ENSG00000183060	LYSMD4	0	0	Novel
Fat	ENSG00000002822	MAD1L1	0	0	Novel
Fat	ENSG00000142733	MAP3K6	0	2	Nonhumans only
Fat	ENSG00000099308	MAST3	0	1	Nonhumans only
Fat	ENSG00000204406	MBD5	0	0	Novel
Fat	ENSG00000126217	MCF2L	1	0	Humans only
Fat	ENSG00000156026	MCU	0	0	Novel
Fat	ENSG00000068305	MEF2A	0	3	Nonhumans only
Fat	ENSG00000168282	MGAT2	0	0	Novel
Fat	ENSG00000101871	MID1	0	0	Novel
Fat	ENSG00000249669	MIR143HG	0	0	Novel
Fat	ENSG00000173269	MMRN2	0	1	Nonhumans only
Fat	ENSG00000070444	MNT	0	2	Nonhumans only
Fat	ENSG00000149573	MPZL2	0	2	Nonhumans only
Fat	ENSG00000129422	MTUS1	0	2	Nonhumans only
Fat	ENSG00000136997	MYC	0	0	Novel
Fat	ENSG00000145949	MYLK4	0	0	Novel
Fat	ENSG00000173559	NABP1	0	1	Nonhumans only
Fat	ENSG00000124151	NCOA3	1	0	Humans only
Fat	ENSG00000166579	NDEL1	0	2	Nonhumans only
Fat	ENSG00000102471	NDFIP2	0	2	Nonhumans only
Fat	ENSG00000141905	NFIC	0	1	Nonhumans only
Fat	ENSG00000165030	NFIL3	1	1	Across Taxa
Fat	ENSG00000001461	NIPAL3	1	0	Humans only
Fat	ENSG00000111641	NOP2	0	2	Nonhumans only
Fat	ENSG00000148400	NOTCH1	0	2	Nonhumans only
Fat	ENSG00000126368	NR1D1	0	2	Nonhumans only
Fat	ENSG00000174738	NR1D2	1	0	Humans only
Fat	ENSG00000111696	NT5DC3	0	0	Novel
Fat	ENSG00000144645	OSBPL10	0	3	Nonhumans only
Fat	ENSG00000164823	OSGIN2	0	2	Nonhumans only
Fat	ENSG00000173599	PC	1	4	Across Taxa
Fat	ENSG00000107438	PDLIM1	0	2	Nonhumans only
Fat	ENSG00000196923	PDLIM7	0	0	Novel
Fat	ENSG00000179094	PER1	1	4	Across Taxa
Fat	ENSG00000132326	PER2	0	3	Nonhumans only
Fat	ENSG00000049246	PER3	0	0	Novel
Fat	ENSG00000124587	PEX6	0	1	Nonhumans only
Fat	ENSG00000043143	PHF15	0	3	Nonhumans only
Fat	ENSG00000102221	PHF16	0	2	Nonhumans only
Fat	ENSG00000019144	PHLDB1	0	3	Nonhumans only
Fat	ENSG00000133056	PIK3C2B	0	0	Novel
Fat	ENSG00000145675	PIK3R1	2	0	Humans only
Fat	ENSG00000174238	PITPNA	0	2	Nonhumans only
Fat	ENSG00000154217	PITPNC1	0	3	Nonhumans only
Fat	ENSG00000179598	PLD6	0	0	Novel
Fat	ENSG00000178209	PLEC	0	1	Nonhumans only
Fat	ENSG00000147872	PLIN2	1	1	Across Taxa
Fat	ENSG00000004399	PLXND1	0	0	Novel
Fat	ENSG00000124225	PMEPA1	1	2	Across Taxa
Fat	ENSG00000128567	PODXL	0	1	Nonhumans only
Fat	ENSG00000132170	PPARG	0	1	Nonhumans only
Fat	ENSG00000110841	PPFIBP1	0	1	Nonhumans only
Fat	ENSG00000118898	PPL	0	0	Novel
Fat	ENSG00000137713	PPP2R1B	2	0	Humans only
Fat	ENSG00000138814	PPP3CA	0	1	Nonhumans only
Fat	ENSG00000221823	PPP3R1	1	0	Humans only
Fat	ENSG00000163932	PRKCD	0	0	Novel
Fat	ENSG00000161542	PRPSAP1	0	0	Novel
Fat	ENSG00000184838	PRR16	0	0	Novel
Fat	ENSG00000186654	PRR5	0	0	Novel
Fat	ENSG00000248405	PRR5-ARHGAP8	0	0	Novel
Fat	ENSG00000135362	PRR5L	1	0	Humans only
Fat	ENSG00000108671	PSMD11	0	2	Nonhumans only
Fat	ENSG00000068878	PSME4	0	1	Nonhumans only
Fat	ENSG00000171522	PTGER4	0	0	Novel
Fat	ENSG00000184489	PTP4A3	0	0	Novel
Fat	ENSG00000070159	PTPN3	1	1	Across Taxa
Fat	ENSG00000152932	RAB3C	0	0	Novel
Fat	ENSG00000136828	RALGPS1	0	0	Novel
Fat	ENSG00000107263	RAPGEF1	0	1	Nonhumans only
Fat	ENSG00000079337	RAPGEF3	0	3	Nonhumans only
Fat	ENSG00000075391	RASAL2	0	1	Nonhumans only
Fat	ENSG00000100461	RBM23	0	0	Novel
Fat	ENSG00000147274	RBMX	0	3	Nonhumans only
Fat	ENSG00000132669	RIN2	0	0	Novel
Fat	ENSG00000196204	RNF216P1	0	0	Novel
Fat	ENSG00000253177	RP11-100L22.1	0	0	Novel
Fat	ENSG00000234944	RP11-124O11.1	0	0	Novel
Fat	ENSG00000240758	RP11-155G14.6	0	0	Novel
Fat	ENSG00000229116	RP11-20J15.3	0	0	Novel
Fat	ENSG00000258711	RP11-218E20.3	0	0	Novel
Fat	ENSG00000239665	RP11-295P9.3	0	0	Novel
Fat	ENSG00000258377	RP11-649E7.5	0	0	Novel
Fat	ENSG00000205018	RP11-830F9.6	0	0	Novel
Fat	ENSG00000257433	RP1-197B17.3	0	0	Novel
Fat	ENSG00000255275	RP13-279N23.2	0	0	Novel
Fat	ENSG00000236266	RP3-467L1.4	0	0	Novel
Fat	ENSG00000254154	RP4-798P15.3	0	0	Novel
Fat	ENSG00000130066	SAT1	1	2	Across Taxa
Fat	ENSG00000073060	SCARB1	0	1	Nonhumans only
Fat	ENSG00000007314	SCN4A	0	0	Novel
Fat	ENSG00000125775	SDCBP2	0	0	Novel
Fat	ENSG00000185033	SEMA4B	0	0	Novel
Fat	ENSG00000167680	SEMA6B	0	0	Novel
Fat	ENSG00000138758	SEPT11	0	0	Novel
Fat	ENSG00000172985	SH3RF3	0	0	Novel
Fat	ENSG00000169247	SH3TC2	0	0	Novel
Fat	ENSG00000196470	SIAH1	0	0	Novel
Fat	ENSG00000181788	SIAH2	0	1	Nonhumans only
Fat	ENSG00000112246	SIM1	0	0	Novel
Fat	ENSG00000127511	SIN3B	0	3	Nonhumans only
Fat	ENSG00000157933	SKI	0	2	Nonhumans only
Fat	ENSG00000079215	SLC1A3	0	1	Nonhumans only
Fat	ENSG00000168575	SLC20A2	0	2	Nonhumans only
Fat	ENSG00000148339	SLC25A25	0	1	Nonhumans only
Fat	ENSG00000138449	SLC40A1	1	2	Across Taxa
Fat	ENSG00000162426	SLC45A1	0	0	Novel
Fat	ENSG00000211584	SLC48A1	0	1	Nonhumans only
Fat	ENSG00000138074	SLC5A6	1	0	Humans only
Fat	ENSG00000103064	SLC7A6	0	1	Nonhumans only
Fat	ENSG00000103061	SLC7A6OS	0	0	Novel
Fat	ENSG00000065054	SLC9A3R2	0	1	Nonhumans only
Fat	ENSG00000101187	SLCO4A1	0	0	Novel
Fat	ENSG00000137776	SLTM	0	1	Nonhumans only
Fat	ENSG00000137834	SMAD6	0	2	Nonhumans only
Fat	ENSG00000101665	SMAD7	0	0	Novel
Fat	ENSG00000214338	SOGA3	0	0	Novel
Fat	ENSG00000255330	SOGA3	0	0	Novel
Fat	ENSG00000124766	SOX4	0	4	Nonhumans only
Fat	ENSG00000065526	SPEN	1	2	Across Taxa
Fat	ENSG00000063176	SPHK2	1	1	Across Taxa
Fat	ENSG00000121067	SPOP	1	0	Humans only
Fat	ENSG00000171621	SPSB1	0	0	Novel
Fat	ENSG00000123096	SSPN	0	0	Novel
Fat	ENSG00000115525	ST3GAL5	0	1	Nonhumans only
Fat	ENSG00000073849	ST6GAL1	0	1	Nonhumans only
Fat	ENSG00000070526	ST6GALNAC1	0	0	Novel
Fat	ENSG00000138134	STAMBPL1	1	0	Humans only
Fat	ENSG00000133121	STARD13	0	2	Nonhumans only
Fat	ENSG00000084090	STARD7	1	0	Humans only
Fat	ENSG00000130052	STARD8	0	0	Novel
Fat	ENSG00000081320	STK17B	1	0	Humans only
Fat	ENSG00000125834	STK35	0	0	Novel
Fat	ENSG00000112079	STK38	0	0	Novel
Fat	ENSG00000211455	STK38L	0	1	Nonhumans only
Fat	ENSG00000011347	SYT7	0	1	Nonhumans only
Fat	ENSG00000137501	SYTL2	0	2	Nonhumans only
Fat	ENSG00000147526	TACC1	0	2	Nonhumans only
Fat	ENSG00000138162	TACC2	0	2	Nonhumans only
Fat	ENSG00000169762	TAPT1	0	0	Novel
Fat	ENSG00000162065	TBC1D24	0	0	Novel
Fat	ENSG00000006638	TBXA2R	0	0	Novel
Fat	ENSG00000180190	TDRP	0	0	Novel
Fat	ENSG00000167074	TEF	0	0	Novel
Fat	ENSG00000111077	TENC1	0	3	Nonhumans only
Fat	ENSG00000151287	TEX30	0	0	Novel
Fat	ENSG00000105825	TFPI2	2	1	Across Taxa
Fat	ENSG00000126351	THRA	0	1	Nonhumans only
Fat	ENSG00000140332	TLE3	0	0	Novel
Fat	ENSG00000172765	TMCC1	0	3	Nonhumans only
Fat	ENSG00000057704	TMCC3	0	0	Novel
Fat	ENSG00000152128	TMEM163	0	0	Novel
Fat	ENSG00000135048	TMEM2	0	0	Novel
Fat	ENSG00000131634	TMEM204	0	0	Novel
Fat	ENSG00000153485	TMEM251	1	0	Humans only
Fat	ENSG00000163900	TMEM41A	0	0	Novel
Fat	ENSG00000204178	TMEM57	0	0	Novel
Fat	ENSG00000175606	TMEM70	0	2	Nonhumans only
Fat	ENSG00000133687	TMTC1	0	2	Nonhumans only
Fat	ENSG00000215788	TNFRSF25	2	0	Humans only
Fat	ENSG00000061938	TNK2	0	2	Nonhumans only
Fat	ENSG00000169905	TOR1AIP2	0	0	Novel
Fat	ENSG00000118094	TREH	0	0	Novel
Fat	ENSG00000204713	TRIM27	0	0	Novel
Fat	ENSG00000103197	TSC2	0	1	Nonhumans only
Fat	ENSG00000157514	TSC22D3	0	4	Nonhumans only
Fat	ENSG00000198860	TSEN15	0	0	Novel
Fat	ENSG00000106025	TSPAN12	0	3	Nonhumans only
Fat	ENSG00000196659	TTC30B	0	0	Novel
Fat	ENSG00000184811	TUSC5	0	0	Novel
Fat	ENSG00000086712	TXLNG	0	1	Nonhumans only
Fat	ENSG00000137831	UACA	1	1	Across Taxa
Fat	ENSG00000143179	UCK2	0	1	Nonhumans only
Fat	ENSG00000094841	UPRT	0	0	Novel
Fat	ENSG00000164338	UTP15	0	0	Novel
Fat	ENSG00000049247	UTS2	0	0	Novel
Fat	ENSG00000125753	VASP	0	0	Novel
Fat	ENSG00000167716	WDR81	0	1	Nonhumans only
Fat	ENSG00000147548	WHSC1L1	0	2	Nonhumans only
Fat	ENSG00000124571	XPO5	0	1	Nonhumans only
Fat	ENSG00000175155	YPEL2	0	1	Nonhumans only
Fat	ENSG00000109906	ZBTB16	0	2	Nonhumans only
Fat	ENSG00000152518	ZFP36L2	0	2	Nonhumans only
Fat	ENSG00000259305	ZHX1-C8ORF76	0	0	Novel
Fat	ENSG00000155592	ZKSCAN2	0	0	Novel
Fat	ENSG00000096654	ZNF184	0	2	Nonhumans only
Fat	ENSG00000169131	ZNF354A	1	1	Across Taxa
Fat	ENSG00000180357	ZNF609	0	0	Novel
Fat	ENSG00000185252	ZNF74	0	0	Novel
Fat	ENSG00000102984	ZNF821	0	1	Nonhumans only
Fat	ENSG00000233165	NA	0	0	Novel
Fat	ENSG00000235167	NA	0	0	Novel

## Sheet: Table S4. TopGO. TWAS P<1E-5 
Tissue	Exposure	GO.ID	Term	Annotated	Significant	Expected	Signif / Annot	(Signif – Exp) / Annot	Fisher	Fisher Elim	Fisher Weight	Fisher Weight01	FisherLea	FisherPC	Row max P	fdr.FisherElim	fdr.Fisher
Fat	HoursFasting	GO:0030947	regulation of vascular endothelial growth factor receptor signaling pathway	25	8	0.79	0.32	0.2884	6.4e-07	6.4e-07	6.4e-07	3.8e-07	6.4e-07	7.3e-06	7.3e-06	0.0316445	0.00336223
Fat	HoursFasting	GO:0042593	glucose homeostasis	168	22	5.32	0.130952	0.0992857	1.6e-08	3.8e-06	2e-07	3.8e-06	1.6e-08	1	1	0.0939446	0.000197778
Fat	HoursFasting	GO:0032922	circadian regulation of gene expression	50	9	1.58	0.18	0.1484	2.3e-05	2.3e-05	1	2.3e-05	2.3e-05	0.00012	1	0.379075	0.0494445
Fat	HoursFasting	GO:0042752	regulation of circadian rhythm	79	14	2.5	0.177215	0.14557	1.5e-07	4.7e-05	1	0.0012	1.5e-07	6.3e-07	1	0.580973	0.00123611
Fat	HoursFasting	GO:1901653	cellular response to peptide	271	28	8.58	0.103321	0.0716605	3.6e-08	0.00022	4.8e-05	0.00035	3.6e-08	0.00248	0.00248	1	0.000356001
Fat	HoursFasting	GO:0048511	rhythmic process	243	29	7.7	0.119342	0.0876543	7.3e-10	0.00034	4.4e-07	0.12001	7.3e-10	7.3e-10	0.12001	1	3.60945e-05
Fat	HoursFasting	GO:0090276	regulation of peptide hormone secretion	138	17	4.37	0.123188	0.0915217	1.7e-06	0.00071	1.7e-06	0.00889	1.7e-06	0.00016	0.00889	1	0.00700464
Fat	HoursFasting	GO:0007623	circadian rhythm	154	21	4.88	0.136364	0.104675	1.6e-08	0.01802	1	0.03312	1.6e-08	0.19291	1	1	0.000197778
Fat	HoursFasting	GO:0071375	cellular response to peptide hormone stimulus	250	23	7.92	0.092	0.06032	4.5e-06	0.0326	1	0.55288	4.5e-06	0.13198	1	1	0.0148334
Fat	HoursFasting	GO:1901342	regulation of vasculature development	200	19	6.33	0.095	0.06335	2e-05	0.04768	1	1	0.42946	0.00473	1	1	0.04709
Fat	HoursFasting	GO:0071396	cellular response to lipid	440	33	13.93	0.075	0.0433409	3.9e-06	0.05333	0.01302	0.58822	3.9e-06	0.00285	0.58822	1	0.0137738
Fat	HoursFasting	GO:0045765	regulation of angiogenesis	182	18	5.76	0.0989011	0.0672527	1.9e-05	0.05587	0.00079	0.12494	1.9e-05	0.0014	0.12494	1	0.0469723
Fat	HoursFasting	GO:0001568	blood vessel development	494	34	15.64	0.0688259	0.037166	1.8e-05	0.11291	0.63555	0.12003	1.8e-05	0.0042	0.63555	1	0.0468422
Fat	HoursFasting	GO:1903053	regulation of extracellular matrix organization	26	7	0.82	0.269231	0.237692	1.2e-05	0.11925	1.2e-05	1	1.2e-05	3e-05	1	1	0.034902
Fat	HoursFasting	GO:0046883	regulation of hormone secretion	169	19	5.35	0.112426	0.0807692	1.7e-06	0.24551	1	1	0.24551	0.00023	1	1	0.00700464
Fat	HoursFasting	GO:0009914	hormone transport	205	22	6.49	0.107317	0.0756585	5.6e-07	0.36759	0.09353	0.00876	5.6e-07	5.9e-07	0.36759	1	0.00336223
Fat	HoursFasting	GO:0010817	regulation of hormone levels	315	25	9.98	0.0793651	0.0476825	2.3e-05	0.49504	1	1	0.65475	0.0009	1	1	0.0494445
Fat	HoursFasting	GO:1901699	cellular response to nitrogen compound	492	36	15.58	0.0731707	0.0415041	2.5e-06	0.51755	1	1	0.60097	0.00098	1	1	0.00950856
Fat	HoursFasting	GO:0071417	cellular response to organonitrogen compound	425	34	13.46	0.08	0.0483294	6.5e-07	0.51905	1	1	0.31839	0.00046	1	1	0.00336223
Fat	HoursFasting	GO:1901652	response to peptide	368	31	11.65	0.0842391	0.0525815	6.8e-07	0.56219	1	1	0.56219	0.00148	1	1	0.00336223
Fat	HoursFasting	GO:0030072	peptide hormone secretion	164	17	5.19	0.103659	0.0720122	1.7e-05	1	1	1	1	0.00113	1	1	0.0466976
Fat	HoursFasting	GO:0033500	carbohydrate homeostasis	168	22	5.32	0.130952	0.0992857	1.6e-08	1	1	1	1	2.5e-05	1	1	0.000197778
Fat	HoursFasting	GO:0046879	hormone secretion	200	20	6.33	0.1	0.06835	5.5e-06	1	1	1	0.61839	0.02892	1	1	0.0169966
Fat	TimeOfDay	GO:0032922	circadian regulation of gene expression	50	8	0.5	0.16	0.15	2.8e-08	2.8e-08	2.8e-08	2.8e-08	2.8e-08	1.3e-07	1.3e-07	0.00138445	0.000346112
Fat	TimeOfDay	GO:0042752	regulation of circadian rhythm	79	9	0.78	0.113924	0.104051	7.9e-08	0.00023	2.5e-06	0.0005	7.9e-08	4e-07	0.0005	1	0.00065102
Fat	TimeOfDay	GO:0042593	glucose homeostasis	168	11	1.67	0.0654762	0.0555357	8.5e-07	0.00035	1.6e-06	0.00035	8.5e-07	1	1	1	0.00391061
Fat	TimeOfDay	GO:0090276	regulation of peptide hormone secretion	138	10	1.37	0.0724638	0.0625362	1.1e-06	0.00736	0.0134	0.04563	1.1e-06	0.00042	0.0456	1	0.00453242
Fat	TimeOfDay	GO:0007623	circadian rhythm	154	14	1.53	0.0909091	0.080974	3.5e-10	0.00842	1	0.00571	3.5e-10	0.07304	1	1	8.65279e-06
Fat	TimeOfDay	GO:1901655	cellular response to ketone	73	7	0.72	0.0958904	0.0860274	7.5e-06	0.00918	7.5e-06	0.03305	7.5e-06	0.00156	0.0331	1	0.0218138
Fat	TimeOfDay	GO:0071385	cellular response to glucocorticoid stimulus	44	6	0.44	0.136364	0.126364	4.4e-06	0.01008	4.4e-06	0.01008	4.4e-06	0.00279	0.0101	1	0.0167351
Fat	TimeOfDay	GO:0071383	cellular response to steroid hormone stimulus	206	15	2.04	0.0728155	0.0629126	1.8e-09	0.01375	1	1	1.8e-09	3.1e-05	1	1	2.96667e-05
Fat	TimeOfDay	GO:0071384	cellular response to corticosteroid stimulus	48	6	0.48	0.125	0.115	7.3e-06	0.01557	1	1	1	0.03988	1	1	0.0218138
Fat	TimeOfDay	GO:0031958	corticosteroid receptor signaling pathway	17	4	0.17	0.235294	0.225294	2e-05	0.01928	2e-05	0.01928	2e-05	0.00151	0.0193	1	0.04709
Fat	TimeOfDay	GO:0048511	rhythmic process	243	17	2.41	0.0699588	0.0600412	2.5e-10	0.04498	0.0014	0.01336	2.5e-10	2.5e-10	0.045	1	8.65279e-06
Fat	TimeOfDay	GO:0071396	cellular response to lipid	440	18	4.36	0.0409091	0.031	3.2e-07	0.07946	0.56955	1	0.34355	0.00166	1	1	0.00226032
Fat	TimeOfDay	GO:0071407	cellular response to organic cyclic compound	453	18	4.49	0.0397351	0.0298234	4.9e-07	0.09347	1	1	0.37506	0.00209	1	1	0.00302848
Fat	TimeOfDay	GO:0048545	response to steroid hormone	306	16	3.03	0.0522876	0.0423856	5.6e-08	0.09411	0.46072	1	0.59091	8.8e-05	1	1	0.000553779
Fat	TimeOfDay	GO:0009914	hormone transport	205	12	2.03	0.0585366	0.0486341	8.7e-07	0.12678	0.0131	0.00084	8.7e-07	1.4e-06	0.1268	1	0.00391061
Fat	TimeOfDay	GO:1901654	response to ketone	149	9	1.48	0.0604027	0.0504698	1.7e-05	0.16033	1	1	0.16033	0.00076	1	1	0.0420279
Fat	TimeOfDay	GO:0009755	hormone-mediated signaling pathway	180	10	1.78	0.0555556	0.0456667	1.2e-05	0.17855	0.00216	0.17855	1.2e-05	0.00019	0.1786	1	0.032963
Fat	TimeOfDay	GO:0010817	regulation of hormone levels	315	13	3.12	0.0412698	0.0313651	1.4e-05	0.22367	1	1	0.63604	0.00053	1	1	0.0364328
Fat	TimeOfDay	GO:0030072	peptide hormone secretion	164	10	1.63	0.0609756	0.0510366	5.2e-06	1	1	1	1	0.00048	1	1	0.0183651
Fat	TimeOfDay	GO:0033500	carbohydrate homeostasis	168	11	1.67	0.0654762	0.0555357	8.5e-07	1	1	1	1	0.00202	1	1	0.00391061
Fat	TimeOfDay	GO:0046883	regulation of hormone secretion	169	10	1.68	0.0591716	0.0492308	6.8e-06	1	1	1	1	0.00087	1	1	0.0218138
Skin	HoursFasting	GO:0032922	circadian regulation of gene expression	51	7	0.5	0.137255	0.127451	5.7e-07	5.7e-07	5.7e-07	5.7e-07	5.7e-07	3e-07	5.7e-07	0.0290308	0.0290308
Skin	TimeOfDay	GO:0032922	circadian regulation of gene expression	51	8	0.11	0.156863	0.154706	1.1e-13	1.1e-13	1.1e-13	1.1e-13	1.1e-13	1.8e-12	1.8e-12	5.60244e-09	1.86748e-09
Skin	TimeOfDay	GO:0042921	glucocorticoid receptor signaling pathway	15	3	0.03	0.2	0.198	4.2e-06	4.2e-06	4.2e-06	4.2e-06	4.2e-06	0.66912	0.66912	0.106956	0.0267389
Skin	TimeOfDay	GO:0042752	regulation of circadian rhythm	80	8	0.18	0.1	0.09775	4.8e-12	0.00207	2.5e-09	0.00176	4.8e-12	7.5e-11	0.00207	1	6.11176e-08
Skin	TimeOfDay	GO:0045598	regulation of fat cell differentiation	100	5	0.22	0.05	0.0478	2.3e-06	0.00615	1	0.02257	2.3e-06	0.0001	1	1	0.0195237
Skin	TimeOfDay	GO:0048511	rhythmic process	252	12	0.55	0.047619	0.0454365	6.7e-14	0.01782	0.01667	0.12415	0.12536	6.7e-14	0.12536	1	1.7062e-09
Skin	TimeOfDay	GO:0007623	circadian rhythm	155	11	0.34	0.0709677	0.0687742	1.1e-14	0.06451	1	0.05635	1.1e-14	0.02245	1	1	5.60244e-10
Skin	TimeOfDay	GO:0071396	cellular response to lipid	452	8	0.99	0.0176991	0.0155088	3.9e-06	0.09288	0.05568	1	3.9e-06	0.00016	1	1	0.0267389
Skin	TimeOfDay	GO:0045444	fat cell differentiation	181	6	0.4	0.0331492	0.0309392	2.2e-06	0.13795	2.2e-06	1	2.2e-06	1.6e-05	1	1	0.0195237
Skin	TimeOfDay	GO:0031958	corticosteroid receptor signaling pathway	17	3	0.04	0.176471	0.174118	6.3e-06	1	1	1	1	0.00255	1	1	0.0356519

## Sheet: Table S5. ToppFun
Tissue	Exposure	Term	Significant (Annotated)	Expected	P	FDR (BH)
Fat	HoursFasting	regulation of circadian rhythm	12 (80)	1.38	2.3e-06	0.0045
Fat	HoursFasting	circadian regulation of gene expression	8 (50)	0.86	1.9e-06	0.0045
Fat	HoursFasting	glomerular mesangium development	4 (11)	0.19	2.6e-05	0.025
Fat	HoursFasting	negative regulation of cell migration involved in sprouting angiogenesis	4 (11)	0.19	2.6e-05	0.025
Fat	HoursFasting	negative regulation of myotube differentiation	4 (11)	0.19	2.6e-05	0.025
Fat	HoursFasting	cellular response to ketone	8 (73)	1.26	3.5e-05	0.029
Fat	HoursFasting	regulation of vascular endothelial growth factor receptor signaling pathway	5 (25)	0.43	5.8e-05	0.042
Fat	TimeOfDay	circadian regulation of gene expression	8 (50)	0.31	6.9e-10	4e-06
Skin	HoursFasting	circadian regulation of gene expression	7 (51)	0.21	1.4e-09	8.4e-06
Skin	TimeOfDay	circadian regulation of gene expression	8 (51)	0.12	2e-13	1.2e-09
Skin	TimeOfDay	glucocorticoid receptor signaling pathway	3 (15)	0.04	5.2e-06	0.016

## Sheet: Table S6. Ingenuity
Tissue	Exposure	Ingenuity Canonical Pathways	-log(p-value)	Ratio	P	Molecules
Fat	HoursFasting	Circadian Rhythm Signaling	7.43	0.212	3.71535e-08	ARNTL,CRY2,PER3,PER2,PER1,BHLHE41,NR1D1
Fat	HoursFasting	Molecular Mechanisms of Cancer	4.46	0.0374	3.46737e-05	NOTCH1,ADCY5,SMAD6,PIK3R1,FZD4,RAPGEF3,CCND3,PRKCD,CFLAR,SMAD7,BCL2,FZD8,RAPGEF1,FOXO1
Fat	TimeOfDay	Circadian Rhythm Signaling	11.5	0.212	3.16228e-12	ARNTL,CRY2,PER3,PER2,PER1,BHLHE41,NR1D1
Fat	TimeOfDay	Adipogenesis pathway	5.76	0.0448	1.7378e-06	ARNTL,PER2,NR1D2,FZD8,PPARG,FOXO1
Skin	HoursFasting	Circadian Rhythm Signaling	6.25	0.0909	5.62341e-07	CRY2,PER3,PER1
Skin	TimeOfDay	Circadian Rhythm Signaling	10.5	0.152	3.16228e-11	ARNTL,CRY2,PER3,PER2,PER1
Skin	TimeOfDay	Adipogenesis pathway	3.89	0.0224	0.000128825	ARNTL,FZD10,PER2

## Sheet: Table S7. TopGO. TWAS P<2E-6
Tissue	Exposure	GO.ID	GO Term	Annotated	Significant	Expected	Signif / Annot	(Signif – Exp) / Annot	Fisher	FisherElim	FisherWeight	FisherWeight01	FisherLea	FisherPC	Row max P	fdr.FisherElim	fdr.Fisher
Fat	HoursFasting	GO:0042752	regulation of circadian rhythm	79	11	1.26	0.139241	0.123291	4.7e-08	4.7e-08	6e-07	2.9e-05	4.7e-08	2e-07	2.9e-05	0.00232389	0.000774631
Fat	HoursFasting	GO:0032922	circadian regulation of gene expression	50	8	0.8	0.16	0.144	1.1e-06	1.1e-06	1.1e-06	1.1e-06	1.1e-06	9.1e-06	9.1e-06	0.0271945	0.00906483
Fat	HoursFasting	GO:0030947	regulation of vascular endothelial growth factor receptor signaling pathway	25	6	0.4	0.24	0.224	2.1e-06	2.1e-06	2.1e-06	1.9e-05	2.1e-06	3.6e-05	3.6e-05	0.0346112	0.0103384
Fat	HoursFasting	GO:0072109	glomerular mesangium development	11	4	0.18	0.363636	0.347273	1.9e-05	1.9e-05	1.9e-05	1.9e-05	1.9e-05	0.00017	0.00017	0.234862	0.0408455
Fat	HoursFasting	GO:1901655	cellular response to ketone	73	9	1.17	0.123288	0.10726	2.3e-06	0.00067	2.3e-06	0.01107	2.3e-06	0.00142	0.01107	1	0.0103384
Fat	HoursFasting	GO:0048511	rhythmic process	243	21	3.89	0.0864198	0.0704115	3.1e-10	0.00075	0.00874	0.03449	3.1e-10	3.1e-10	0.03449	1	1.53278e-05
Fat	HoursFasting	GO:0071385	cellular response to glucocorticoid stimulus	44	7	0.7	0.159091	0.143182	5.6e-06	0.00184	5.6e-06	0.00184	5.6e-06	0.00551	0.00551	1	0.0184593
Fat	HoursFasting	GO:0001568	blood vessel development	494	22	7.9	0.0445344	0.0285425	1.4e-05	0.00291	0.00212	0.02192	1.4e-05	0.00393	0.02192	1	0.0364328
Fat	HoursFasting	GO:1901653	cellular response to peptide	271	17	4.33	0.0627306	0.0467528	1.6e-06	0.00374	8.1e-05	0.00374	1.6e-06	0.01683	0.01683	1	0.0103384
Fat	HoursFasting	GO:0009914	hormone transport	205	14	3.28	0.0682927	0.0522927	5.3e-06	0.00825	0.02711	0.00225	5.3e-06	1.4e-06	0.02711	1	0.0184593
Fat	HoursFasting	GO:0033500	carbohydrate homeostasis	168	13	2.69	0.077381	0.061369	2.9e-06	0.0169	1	1	1	0.0005	1	1	0.0110299
Fat	HoursFasting	GO:0042593	glucose homeostasis	168	13	2.69	0.077381	0.061369	2.9e-06	0.0169	1.3e-05	0.0169	2.9e-06	1	1	1	0.0110299
Fat	HoursFasting	GO:0090276	regulation of peptide hormone secretion	138	11	2.21	0.0797101	0.0636957	1.3e-05	0.01907	1.3e-05	1	1.3e-05	0.00017	1	1	0.0357099
Fat	HoursFasting	GO:0007623	circadian rhythm	154	16	2.46	0.103896	0.0879221	3.1e-09	0.0222	1	0.0222	3.1e-09	0.14915	1	1	7.6639e-05
Fat	HoursFasting	GO:0071383	cellular response to steroid hormone stimulus	206	16	3.29	0.0776699	0.061699	1.9e-07	0.02594	0.29408	1	1.9e-07	0.00306	1	1	0.00234862
Fat	HoursFasting	GO:0048545	response to steroid hormone	306	18	4.89	0.0588235	0.0428431	2e-06	0.03656	1	1	0.44277	0.0049	1	1	0.0103384
Fat	HoursFasting	GO:0071396	cellular response to lipid	440	22	7.04	0.05	0.034	2.1e-06	0.04786	0.457	0.3514	0.13906	0.00795	0.457	1	0.0103384
Fat	HoursFasting	GO:0071407	cellular response to organic cyclic compound	453	24	7.25	0.0529801	0.0369757	2.5e-07	0.06987	0.72681	0.63198	0.03235	0.00252	0.72681	1	0.00247223
Fat	HoursFasting	GO:0007519	skeletal muscle tissue development	117	10	1.87	0.0854701	0.0694872	1.8e-05	0.11138	1.8e-05	0.11138	1.8e-05	0.0135	0.11138	1	0.0404546
Fat	HoursFasting	GO:1901652	response to peptide	368	19	5.89	0.0516304	0.035625	7e-06	0.42738	1	1	0.42738	0.01313	1	1	0.021632
Fat	HoursFasting	GO:0090287	regulation of cellular response to growth factor stimulus	198	13	3.17	0.0656566	0.0496465	1.8e-05	0.75607	1	1	0.01847	0.00011	1	1	0.0404546
Fat	HoursFasting	GO:0071417	cellular response to organonitrogen compound	425	20	6.8	0.0470588	0.0310588	1.6e-05	0.84699	1	1	0.406	0.02082	1	1	0.0395556
Fat	HoursFasting	GO:0071384	cellular response to corticosteroid stimulus	48	7	0.77	0.145833	0.129792	1e-05	1	1	1	1	0.02114	1	1	0.029085
Fat	TimeOfDay	GO:0032922	circadian regulation of gene expression	50	8	0.22	0.16	0.1556	3.8e-11	3.8e-11	3.8e-11	3.8e-11	3.8e-11	4.2e-10	4.2e-10	1.87889e-06	6.18057e-07
Fat	TimeOfDay	GO:0042752	regulation of circadian rhythm	79	9	0.35	0.113924	0.109494	5e-11	2.3e-05	6.8e-09	1.7e-05	5e-11	2e-10	2.3e-05	0.379075	6.18057e-07
Fat	TimeOfDay	GO:0007623	circadian rhythm	154	14	0.68	0.0909091	0.0864935	2.9e-15	0.00057	1	0.00038	2.9e-15	0.07304	1	1	7.16946e-11
Fat	TimeOfDay	GO:0048511	rhythmic process	243	17	1.07	0.0699588	0.0655556	1.6e-16	0.00316	1.3e-05	0.00189	1.6e-16	1.6e-16	0.0032	1	7.91113e-12
Fat	TimeOfDay	GO:0071383	cellular response to steroid hormone stimulus	206	9	0.91	0.0436893	0.0392718	2.5e-07	0.01308	1	1	2.5e-07	1.3e-05	1	1	0.00247223
Skin	HoursFasting	GO:0032922	circadian regulation of gene expression	51	6	0.1	0.117647	0.115686	4e-10	4e-10	4e-10	4e-10	4e-10	2.4e-09	2.4e-09	2.03725e-05	7.46992e-06
Skin	HoursFasting	GO:0042921	glucocorticoid receptor signaling pathway	15	3	0.03	0.2	0.198	2.7e-06	2.7e-06	2.7e-06	2.7e-06	2.7e-06	0.66912	0.66912	0.0687572	0.0343786
Skin	HoursFasting	GO:0007623	circadian rhythm	155	8	0.29	0.0516129	0.0497419	2.7e-10	0.00233	1	0.0015	2.7e-10	0.07974	1	1	7.46992e-06
Skin	HoursFasting	GO:0048511	rhythmic process	252	9	0.48	0.0357143	0.0338095	4.4e-10	0.11882	0.00112	0.11767	0.11882	4.4e-10	0.11882	1	7.46992e-06
Skin	HoursFasting	GO:0031958	corticosteroid receptor signaling pathway	17	3	0.03	0.176471	0.174706	4e-06	1	1	1	1	0.00255	1	1	0.040745
Skin	TimeOfDay	GO:0032922	circadian regulation of gene expression	51	7	0.06	0.137255	0.136078	9.1e-14	9.1e-14	9.1e-14	9.1e-14	9.1e-14	3.1e-12	3.1e-12	4.63475e-09	4.63475e-09
Skin	TimeOfDay	GO:0042921	glucocorticoid receptor signaling pathway	15	3	0.02	0.2	0.198667	6.5e-07	6.5e-07	6.5e-07	6.5e-07	6.5e-07	0.66912	0.66912	0.0165527	0.00662107
Skin	TimeOfDay	GO:0033144	negative regulation of intracellular steroid hormone receptor signaling pathway	30	3	0.04	0.1	0.0986667	5.8e-06	5.8e-06	5.8e-06	5.8e-06	5.8e-06	2.1e-05	2.1e-05	0.0984672	0.0328224
Skin	TimeOfDay	GO:0048512	circadian behavior	29	3	0.04	0.103448	0.102069	5.2e-06	0.01576	1	1	5.2e-06	0.16804	1	1	0.0328224
Skin	TimeOfDay	GO:0007622	rhythmic behavior	30	3	0.04	0.1	0.0986667	5.8e-06	0.0168	1	1	1	0.00733	1	1	0.0328224
Skin	TimeOfDay	GO:0048511	rhythmic process	252	9	0.3	0.0357143	0.0345238	2.9e-12	0.10096	0.08049	0.05719	0.00774	2.9e-12	0.10096	1	5.94198e-08
Skin	TimeOfDay	GO:0007623	circadian rhythm	155	8	0.19	0.0516129	0.0503871	3.5e-12	1	1	1	0.06875	0.07974	1	1	5.94198e-08
Skin	TimeOfDay	GO:0031958	corticosteroid receptor signaling pathway	17	3	0.02	0.176471	0.175294	9.7e-07	1	1	1	1	0.00255	1	1	0.00823389
Skin	TimeOfDay	GO:0042752	regulation of circadian rhythm	80	6	0.1	0.075	0.07375	3.1e-10	1	4.5e-07	1	3.1e-10	2.5e-09	1	1	3.94718e-06

## Sheet: Table S8. TopGO. TWAS P<5E-7 
TISSUE	EXPOSURE	GO.ID	GO Term	Annotated	Significant	Expected	Signif / Annot	(Signif – Exp) / Annot	Fisher	FisherElim	FisherWeight	FisherWeight01	FisherLea	FisherPC	Row max P	fdr.FisherElim	fdr.Fisher
Fat	HoursFasting	GO:0032922	circadian regulation of gene expression	50	8	0.66	0.16	0.1468	2.5e-07	2.5e-07	2.5e-07	2.5e-07	2.5e-07	2.1e-06	2.1e-06	0.0123611	0.00309028
Fat	HoursFasting	GO:0042752	regulation of circadian rhythm	79	11	1.04	0.139241	0.126076	5.9e-09	8.7e-06	1.1e-07	9e-06	5.9e-09	2.8e-08	9e-06	0.215084	9.72409e-05
Fat	HoursFasting	GO:0048511	rhythmic process	243	20	3.19	0.0823045	0.069177	5.5e-11	0.001	0.0044	0.02318	5.5e-11	5.5e-11	0.02318	1	2.71945e-06
Fat	HoursFasting	GO:0007623	circadian rhythm	154	16	2.02	0.103896	0.0907792	1.6e-10	0.01261	1	0.01261	1.6e-10	0.08211	1	1	3.95556e-06
Fat	TimeOfDay	GO:0032922	circadian regulation of gene expression	50	8	0.19	0.16	0.1562	1.2e-11	1.2e-11	1.2e-11	1.2e-11	1.2e-11	9.9e-11	9.9e-11	5.93334e-07	1.97778e-07
Fat	TimeOfDay	GO:0007623	circadian rhythm	154	13	0.59	0.0844156	0.0805844	1.2e-14	0.00037	1	0.00024	1.2e-14	0.04285	1	1	2.96667e-10
Fat	TimeOfDay	GO:0042752	regulation of circadian rhythm	79	8	0.3	0.101266	0.0974684	5.4e-10	0.0004	9.4e-08	0.00032	5.4e-10	1.6e-09	0.0004	1	6.67501e-06
Fat	TimeOfDay	GO:0048511	rhythmic process	243	15	0.93	0.0617284	0.0579012	8.5e-15	0.02619	4.5e-05	0.02565	8.5e-15	8.5e-15	0.02619	1	2.96667e-10
Skin	HoursFasting	GO:0032922	circadian regulation of gene expression	51	6	0.07	0.117647	0.116275	6.3e-11	6.3e-11	6.3e-11	6.3e-11	6.3e-11	6.6e-10	6.6e-10	3.20867e-06	1.06956e-06
Skin	HoursFasting	GO:0042921	glucocorticoid receptor signaling pathway	15	3	0.02	0.2	0.198667	1.1e-06	1.1e-06	1.1e-06	1.1e-06	1.1e-06	0.66912	0.66912	0.0280122	0.0140061
Skin	HoursFasting	GO:0007623	circadian rhythm	155	8	0.22	0.0516129	0.0501935	2e-11	0.00108	1	0.00069	2e-11	0.07974	1	1	5.60244e-07
Skin	HoursFasting	GO:0042752	regulation of circadian rhythm	80	4	0.11	0.05	0.048625	4.5e-06	0.00281	0.0029	0.04624	4.5e-06	2.4e-05	0.04624	1	0.0299221
Skin	HoursFasting	GO:0043401	steroid hormone mediated signaling pathway	161	5	0.23	0.0310559	0.0296273	2.5e-06	0.00948	0.00726	0.00122	0.01277	0.15448	0.15448	1	0.0212214
Skin	HoursFasting	GO:0048511	rhythmic process	252	9	0.36	0.0357143	0.0342857	2.2e-11	0.07857	0.00035	0.0778	0.07857	2.2e-11	0.07857	1	5.60244e-07
Skin	HoursFasting	GO:0009755	hormone-mediated signaling pathway	183	5	0.26	0.0273224	0.0259016	4.7e-06	1	1	1	1	1.3e-05	1	1	0.0299221
Skin	HoursFasting	GO:0031958	corticosteroid receptor signaling pathway	17	3	0.02	0.176471	0.175294	1.7e-06	1	1	1	1	0.00255	1	1	0.0173166
Skin	TimeOfDay	GO:0032922	circadian regulation of gene expression	51	6	0.05	0.117647	0.116667	4e-12	4e-12	4e-12	4e-12	4e-12	6.2e-11	6.2e-11	2.03725e-07	2.03725e-07
Skin	TimeOfDay	GO:0042921	glucocorticoid receptor signaling pathway	15	3	0.01	0.2	0.199333	3.3e-07	3.3e-07	3.3e-07	3.3e-07	3.3e-07	0.66912	0.6691	0.00840366	0.00336147
Skin	TimeOfDay	GO:0033144	negative regulation of intracellular steroid hormone receptor signaling pathway	30	3	0.03	0.1	0.099	3e-06	3e-06	3e-06	3e-06	3e-06	2.1e-05	2.1e-05	0.0509313	0.0169771
Skin	TimeOfDay	GO:0048511	rhythmic process	252	8	0.25	0.031746	0.030754	1.8e-11	0.07503	0.06099	0.04321	0.00461	1.8e-11	0.075	1	4.58382e-07
Skin	TimeOfDay	GO:0007622	rhythmic behavior	30	3	0.03	0.1	0.099	3e-06	1	1	1	1	0.00505	1	1	0.0169771
Skin	TimeOfDay	GO:0007623	circadian rhythm	155	7	0.15	0.0451613	0.0441935	4.2e-11	1	1	1	0.05389	0.11908	1	1	7.13038e-07
Skin	TimeOfDay	GO:0031958	corticosteroid receptor signaling pathway	17	3	0.02	0.176471	0.175294	5e-07	1	1	1	1	0.00255	1	1	0.00424427
Skin	TimeOfDay	GO:0042752	regulation of circadian rhythm	80	6	0.08	0.075	0.074	6.6e-11	1	1.5e-07	1	6.6e-11	4.7e-10	1	1	8.40366e-07
Skin	TimeOfDay	GO:0048512	circadian behavior	29	3	0.03	0.103448	0.102414	2.7e-06	1	1	1	2.7e-06	0.11998	1	1	0.0169771

## Sheet: Table S9. Alternative TWAS
Tissue	Model-Specific Adjustments	Genes	Exons	<FDR
Fat		256	626	0.0003
Fat	Seasonality	239	595	0.0003
Fat	Seasonality, total cholesterol and glucose	176	418	0.0005
Fat	Restricted to PM visits	108	253	0.001
Fat	Seasonality, Restricted to PM visits	83	207	0.001
Fat	Seasonality + Gene P values adjusted for confounders and inflation (Originally 246 out of 19080 Genes)	149	N.D.	0.0003
Skin		50	135	0.001
Skin	Seasonality	30	87	0.002
Skin	Seasonality, total cholesterol and glucose	41	91	0.002
Skin	Restricted to PM visits	24	66	0.003
Skin	Seasonality, Restricted to PM visits	21	49	0.003
Skin	Seasonality, Gene P values adjusted for confounders and inflation (Originally 36 significant out of 19863 Genes)	14	N.D.	0.002

## Sheet: Table S10. Top GOTerm AltModel
Tissue	Model-Specific Adjustments, Sample restrictions	Top GO Term	Observed (Total measured)	Expected	P
Fat		Circadian regulation of gene expression	9 (56)	0.98	5×10-7
Fat	Seasonality	Circadian regulation of gene expression	9 (56)	0.92	3×10-7
Fat	Seasonality, total cholesterol and glucose	Circadian regulation of gene expression	9 (56)	0.71	3×10-8
Fat	Restricted to PM visits	Circadian regulation of gene expression	8 (56)	0.47	2×10-8
Fat	Seasonality, Restricted to PM visits	Circadian regulation of gene expression	8 (56)	0.3	1×10-9
Fat	P-value correction for RNA and gene annotation confounders*	Circadian regulation of gene expression	8 (56)	0.56	7×10-8
Skin		Circadian regulation of gene expression	7 (57)	0.2	9×10-9
Skin	Seasonality	Circadian regulation of gene expression	8 (57)	0.17	5×10-12
Skin	Seasonality, total cholesterol and glucose	Circadian regulation of gene expression	6 (57)	0.22	9×10-10
Skin	Restricted to PM visits	Circadian regulation of gene expression	6 (57)	0.11	9×10-10
Skin	Seasonality, Restricted to PM visits	Circadian regulation of gene expression	4 (57)	0.1	3×10-6
Skin	P-value correction for RNA and gene annotation confounders*	Circadian regulation of gene expression	5 (57)	0.06	2×10-9

[truncated: 10 more sheets: Table S11 Cardiometabolic bioma, Table S12. Phenoscanner eqtl, Table S13. GxE, Main Table. Phenoscanner, Main Table XXX. Merge  GxE with, Main Table 6. GxE main paper, Table XXX. GxE analysis merged , TableXXX GxE analysis merged by, Table S11. Heritability, Table S12.  heritability GO]
